# Supplementary material for: Structure of Myosin VI/Tom1 complex reveals a cargo recognition mode of Myosin VI for tethering
Source: Nat Commun. 2019 Aug 1;10:3459. doi: 10.1038/s41467-019-11481-6 (PMC6673701; doi:10.1038/s41467-019-11481-6)
Supplement: Supplementary file 4 — Source Data [file 41467_2019_11481_MOESM4_ESM.xlsx]

## Sheet: Figure 1c-f
Figure 1c							Figure 1d					Figure 1e						Figure 1f
DP_X	DP_Y	Fit_X	Fit_Y	NDH_X	NDH_Y		DP_X	DP_Y	NDH_X	NDH_Y		DP_X	DP_Y	Fit_X	Fit_Y	NDH_X	NDH_Y	volume (mL)	Trx Myosin6(1157 1285) 180608 (UV)	volume (mL)	Trx Myosin6(1157 1285) 180608 (Molar mass)	volume (mL)	Trx Myosin6(1157 1285) with Trx TOM1(437 463) 180608 (UV)	volume (mL)	Trx Myosin6(1157 1285) with Trx TOM1(437 463) 180608 (Molar mass)
0.083333	-0.002376	0.02466	-10.4439	0.123909	-10.4351		0.083333	-0.007705	0.205108	-3.7582		0.083333	-5.2e-05	0.024349	-14.6027	0.12234	-14.551	0.00477	-0.000322555	15.4432	29389.1	0.00523	0.000396801	--	--
0.166667	-0.000878	0.123909	-10.4141	0.22413	-10.3908		0.166667	-0.010053	0.371005	-3.00979		0.1	0.000124	0.12234	-14.5337	0.221277	-14.4553	0.01319	-0.000347471	15.4516	29509.7	0.01365	0.000463336	--	--
0.25	0.00108	0.22413	-10.351	0.325324	-10.5684		0.25	-0.018201	0.538512	-3.56871		0.116667	-0.000531	0.221277	-14.3804	0.32116	-14.134	0.02161	-0.000354187	15.46	29658.6	0.02207	0.000517354	--	--
0.333333	-0.000159	0.325324	-10.2576	0.42749	-10.0276		0.333333	-0.013318	0.707629	-3.6351		0.133333	-0.000765	0.32116	-14.1336	0.42199	-13.6666	0.03003	-0.00034268	15.4685	29782.4	0.03049	0.000555785	--	--
0.416667	0.001124	0.42749	-10.1129	0.530629	-9.57846		0.416667	0.000887	0.878356	-3.34827		0.15	-0.00096	0.42199	-13.7097	0.523767	-12.9676	0.03844	-0.000323364	15.4769	29905.3	0.0389	0.000579256	--	--
0.5	0.001821	0.530629	-9.87514	0.63474	-9.46124		0.5	-0.005045	1.05069	-3.53851		0.166667	-0.001094	0.523767	-12.928	0.626489	-11.375	0.04686	-0.000305476	15.4853	30030.4	0.04732	0.000593069	--	--
0.583333	0.003512	0.63474	-9.45719	0.739824	-8.65537		0.583333	0.003548	1.22464	-2.9868		0.183333	-0.000758	0.626489	-11.4282	0.730158	-8.62881	0.05528	-0.000294321	15.4937	30218.4	0.05574	0.000600864	--	--
0.666667	0.000867	0.739824	-8.6786	0.845881	-7.18551		0.666667	-0.003163	1.4002	-3.48464		0.2	-2.2e-05	0.730158	-8.81923	0.834774	-5.8316	0.0637	-0.000297625	15.5021	30466.7	0.06415	0.00060191	--	--
0.75	0.001085	0.845881	-7.25358	0.95291	-5.37623		0.75	0.005444	1.57736	-3.91435		0.216667	0.000624	0.834774	-5.61129	0.940336	-3.2678	0.07211	-0.000327544	15.5105	30647	0.07257	0.000594856	--	--
0.833333	0.001722	0.95291	-5.1467	1.06091	-2.9758		0.833333	0.00262	1.75614	-3.41797		0.233333	0.00095	0.940336	-3.16116	1.04684	-1.77461	0.08053	-0.00038463	15.519	30769.6	0.08099	0.000582208	--	--
0.916667	0.000968	1.06091	-3.1068	1.16989	-1.66436		0.916667	0.002686	1.93652	-3.35263		0.25	0.000596	1.04684	-1.801	1.1543	-0.97812	0.08895	-0.000440779	15.5274	30862.5	0.08941	0.000571887	--	--
1	0.000239	1.16989	-1.79316	1.27983	-1.25111		1	0.005835	2.11852	-3.09007		0.266667	-8e-06	1.1543	-1.10073	1.2627	-0.609659	0.09737	-0.000471988	15.5358	30936.7	0.09782	0.00056944	--	--
1.08333	-0.000278	1.27983	-1.09168	1.39075	-0.686565		1.08333	0.005216	2.30213	-3.1515		0.283333	-0.000282	1.2627	-0.722802	1.37205	-0.343078	0.10578	-0.000486424	15.5442	30997.2	0.10624	0.00057248	--	--
1.16667	0.000235	1.39075	-0.71878	1.50264	-0.324549		1.16667	0.003902	2.48734	-3.919		0.3	-0.000385	1.37205	-0.503288	1.48234	-0.234459	0.1142	-0.000496167	15.5526	31087.9	0.11466	0.000575908	14.4841	41140.3
1.25	-0.001358	1.50264	-0.508058	1.61551	-0.216582		1.25	0.008203	2.67417	-2.99456		0.316667	-0.000708	1.48234	-0.366768	1.59358	-0.038554	0.12262	-0.000501624	15.561	31176.7	0.12308	0.000575553	14.4925	41477.5
1.33333	-0.001268	1.61551	-0.380479	1.72934	-0.452836		1.33333	0.011259	2.8626	-2.80743		0.333333	-0.000821	1.59358	-0.27685	1.70577	-0.10164	0.13103	-0.000497153	15.5695	31272	0.13149	0.000568129	14.5009	41799.6
1.41667	-0.001579	1.72934	-0.298375	1.84415	-0.419442		1.41667	0.003392	3.05265	-2.63178		0.35	-0.000884	1.70577	-0.214763	1.8189	-0.036706	0.13945	-0.000481232	15.5779	31396.2	0.13991	0.000555451	14.5093	42086.7
1.5	-0.002572	1.84415	-0.242769	1.95994	-0.220476		1.5	0.001902	3.2443	-2.5438		0.366667	-0.000677	1.8189	-0.170185	1.93298	-0.059527	0.14787	-0.000460435	15.5863	31520.7	0.14833	0.000546421	14.5178	42360.5
1.58333	-0.00114	1.95994	-0.203476				1.58333	0.003579	3.43757	-3.72769		0.383333	-0.00044	1.93298	-0.137113	2.048	0.087673	0.15629	-0.000440347	15.5947	31667.7	0.15674	0.00054963	14.5262	42624.7
1.66667	-0.000984						1.66667	0.004522				0.4	3.9e-05	2.048	-0.111884			0.1647	-0.000421612	15.6031	31802.1	0.16516	0.00056707	14.5346	42885.8
1.75	0.002686						1.75	0.003672				0.416667	0.000208					0.17312	-0.000401783	15.6115	31917.4	0.17358	0.000593833	14.543	43148.6
1.83333	0.0005						1.83333	0.002779				0.433333	0.000387					0.18154	-0.000376637	15.62	32022.2	0.182	0.000621561	14.5514	43413.2
1.91667	0.001017						1.91667	0.002022				0.45	0.000756					0.18996	-0.000342594	15.6284	32097.5	0.19041	0.000644916	14.5599	43665.8
2	0.000776						2	0.002581				0.466667	0.000895					0.19837	-0.000299506	15.6368	32153.7	0.19883	0.00066213	14.5683	43913.5
2.08333	-0.034805						2.08333	-0.007723				0.483333	0.001024					0.20679	-0.000253058	15.6452	32215	0.20725	0.000671991	14.5767	44130.7
2.16667	-0.206568						2.16667	-0.052552				0.5	0.001006					0.21521	-0.000213183	15.6536	32278.9	0.21567	0.000671107	14.5851	44334.3
2.25	-0.069295						2.25	-0.044876				0.516667	0.000968					0.22362	-0.000187357	15.6621	32352.5	0.22408	0.000652772	14.5935	44523.6
2.33333	-0.026267						2.33333	-0.036475				0.533333	0.00081					0.23204	-0.000181101	15.6705	32412.3	0.2325	0.000616146	14.6019	44700.8
2.41667	-0.016085						2.41667	-0.0176				0.55	0.000272					0.24046	-0.000198949	15.6789	32462.5	0.24092	0.000570979	14.6104	44850.3
2.5	-0.006832						2.5	-0.012091				0.566667	-0.000226					0.24888	-0.000242502	15.6873	32506.9	0.24933	0.000528034	14.6188	44987.6
2.58333	-0.006368						2.58333	-0.007828				0.583333	-0.000214					0.25729	-0.000306368	15.6957	32552.1	0.25775	0.000497274	14.6272	45117.5
2.66667	-0.008285						2.66667	-0.003692				0.6	-0.000298					0.26571	-0.000373792	15.7041	32589.4	0.26617	0.000482097	14.6356	45228.9
2.75	-0.004855						2.75	-0.000902				0.616667	-0.000703					0.27413	-0.000424141	15.7126	32632.6	0.27459	0.000477368	14.644	45343.7
2.83333	-0.001549						2.83333	0.000139				0.633333	-0.001187					0.28255	-0.000448813	15.721	32662.6	0.283	0.000481055	14.6524	45437.5
2.91667	-0.001866						2.91667	-0.000327				0.65	-0.001481					0.29096	-0.000451695	15.7294	32688.8	0.29142	0.000494526	14.6608	45497.6
3	-0.002837						3	-0.001381				0.666667	-0.001696					0.29938	-0.000438723	15.7378	32713.5	0.29984	0.000516573	14.6693	45520.8
3.08333	0.00077						3.08333	-0.000473				0.683333	-0.00193					0.3078	-0.000418355	15.7462	32755.7	0.30826	0.000545642	14.6777	45565.4
3.16667	-0.000272						3.16667	-0.002224				0.7	-0.002041					0.31621	-0.000403195	15.7546	32753.6	0.31667	0.000578208	14.6861	45576
3.25	-0.000131						3.25	-0.000805				0.716667	-0.001791					0.32463	-0.000403885	15.7631	32744.3	0.32509	0.000605813	14.6945	45579.2
3.33333	0.001435						3.33333	-0.000975				0.733333	-0.001561					0.33305	-0.000423447	15.7715	32741.9	0.33351	0.000617672	14.7029	45581.7
3.41667	0.001039						3.41667	-0.001964				0.75	-0.001352					0.34147	-0.000455104	15.7799	32755.9	0.34192	0.000608269	14.7114	45587.9
3.5	-0.000618						3.5	-0.004804				0.766667	-0.001172					0.34988	-0.000483475	15.7883	32754.4	0.35034	0.000586584	14.7198	45587.8
3.58333	0.000246						3.58333	-0.003114				0.783333	-0.000892					0.3583	-0.000498644	15.7967	32738.6	0.35876	0.000566229	14.7282	45577.5
3.66667	-0.001687						3.66667	-0.003554				0.8	-0.000156					0.36672	-0.000503876	15.8051	32742.2	0.36718	0.000552302	14.7366	45533.8
3.75	-0.002206						3.75	-0.004025				0.816667	0.000321					0.37514	-0.00050445	15.8136	32759	0.37559	0.000542381	14.745	45478.6
3.83333	0.001242						3.83333	-0.004596				0.833333	0.000588					0.38355	-0.000501372	15.822	32753.8	0.38401	0.000532172	14.7534	45419.9
3.91667	0.00247						3.91667	-0.007688				0.85	0.000654					0.39197	-0.000495542	15.8304	32739.1	0.39243	0.000521065	14.7619	45362.7
4	0.001159						4	-0.005019				0.866667	0.001051					0.40039	-0.000491417	15.8388	32695.5	0.40085	0.000515871	14.7703	45301
4.08333	-0.057048						4.08333	-0.069059				0.883333	0.001118					0.4088	-0.000492991	15.8472	32668.2	0.40926	0.000522319	14.7787	45238
4.16667	-0.826939						4.16667	-0.279118				0.9	0.001234					0.41722	-0.000498865	15.8557	32657.7	0.41768	0.000533629	14.7871	45177.4
4.25	-0.667163						4.25	-0.296826				0.916667	0.002441					0.42564	-0.000504487	15.8641	32624.5	0.4261	0.000540864	14.7955	45118.1
4.33333	-0.237999						4.33333	-0.224122				0.933333	0.003649					0.43406	-0.00050752	15.8725	32574.4	0.43451	0.000539065	14.804	45071.6
4.41667	-0.124734						4.41667	-0.146727				0.95	0.003796					0.44247	-0.000506834	15.8809	32548	0.44293	0.000521945	14.8124	45013.3
4.5	-0.069507						4.5	-0.092369				0.966667	0.003013					0.45089	-0.000497908	15.8893	32528.3	0.45135	0.000480941	14.8208	44927.6
4.58333	-0.038815						4.58333	-0.060078				0.983333	0.00191					0.45931	-0.000478624	15.8977	32500	0.45977	0.000417458	14.8292	44834.5
4.66667	-0.022888						4.66667	-0.033815				1	-0.003572					0.46773	-0.000455897	15.9062	32458.7	0.46818	0.000348036	14.8376	44733
4.75	-0.017504						4.75	-0.020808				1.01667	-0.004843					0.47614	-0.000436648	15.9146	32444.1	0.4766	0.00028546	14.846	44641
4.83333	-0.011771						4.83333	-0.009357				1.03333	-0.010734					0.48456	-0.000423162	15.923	32409.2	0.48502	0.000229987	14.8544	44570.1
4.91667	-0.004777						4.91667	-0.006122				1.05	-0.050015					0.49298	-0.000414811	15.9314	32320.7	0.49344	0.000175681	14.8629	44516.5
5	-0.003951						5	0.001457				1.06667	-0.161215					0.50139	-0.000407301	15.9398	32258.6	0.50185	0.000117851	14.8713	44427.9
5.08333	-0.004291						5.08333	0.002101				1.08333	-0.288076					0.50981	-0.000395877	15.9482	32199.3	0.51027	5.97255e-05	14.8797	44329.2
5.16667	-0.000965						5.16667	0.00536				1.1	-0.350687					0.51823	-0.000382062	15.9566	32151.6	0.51869	1.07395e-05	14.8881	44221.8
5.25	-0.001492						5.25	0.005554				1.11667	-0.341496					0.52665	-0.000371471	15.9651	32115.9	0.5271	-2.33001e-05	14.8965	44107.4
5.33333	-0.000839						5.33333	0.006104				1.13333	-0.290536					0.53506	-0.000369416	15.9735	32061.7	0.53552	-4.72707e-05	14.905	43990.6
5.41667	0.000755						5.41667	0.00508				1.15	-0.230835					0.54348	-0.000381366	15.9819	31989.8	0.54394	-6.96025e-05	14.9134	43889.6
5.5	0.001245						5.5	0.004883				1.16667	-0.178015					0.5519	-0.000405941	15.9903	31920.3	0.55236	-9.43847e-05	14.9218	43813.4
5.58333	0.003232						5.58333	0.005011				1.18333	-0.135945					0.56032	-0.000433018	15.9987	31867.8	0.56077	-0.000116667	14.9302	43710.9
5.66667	0.001028						5.66667	0.004546				1.2	-0.103394					0.56873	-0.000457314	16.0072	31808.4	0.56919	-0.000121954	14.9386	43598.6
5.75	0.003824						5.75	0.004887				1.21667	-0.085463					0.57715	-0.000479644	16.0156	31754.3	0.57761	-0.00010273	14.947	43468.1
5.83333	0.001152						5.83333	0.003953				1.23333	-0.069752					0.58557	-0.00049901	16.024	31729.6	0.58603	-6.87028e-05	14.9555	43343.1
5.91667	0.003249						5.91667	0.007234				1.25	-0.059101					0.59398	-0.000508795	16.0324	31695	0.59444	-3.37904e-05	14.9639	43233.3
6	0.003656						6	0.00706				1.26667	-0.04939					0.6024	-0.000504932	16.0408	31624.2	0.60286	-5.86842e-06	14.9723	43133.2
6.08333	-0.049532						6.08333	-0.101001				1.28333	-0.043839					0.61082	-0.000493735	16.0492	31574.9	0.61128	1.52321e-05	14.9807	43042.4
6.16667	-0.775965						6.16667	-0.257848				1.3	-0.039729					0.61924	-0.000482247	16.0577	31532.6	0.61969	4.22307e-05	14.9891	42931.5
6.25	-0.651656						6.25	-0.266263				1.31667	-0.036988					0.62765	-0.000474884	16.0661	31445	0.62811	9.22777e-05	14.9976	42803
6.33333	-0.240178						6.33333	-0.198276				1.33333	-0.034937					0.63607	-0.000478431	16.0745	31381.1	0.63653	0.000163009	15.006	42675.5
6.41667	-0.132854						6.41667	-0.123869				1.35	-0.032387					0.64449	-0.000499742	16.0829	31331.7	0.64495	0.000235771	15.0144	42577.6
6.5	-0.083286						6.5	-0.07421				1.36667	-0.030206					0.65291	-0.000532851	16.0913	31359.5	0.65336	0.000293333	15.0228	42501.9
6.58333	-0.053866						6.58333	-0.046763				1.38333	-0.027835					0.66132	-0.000559095	16.0998	31398	0.66178	0.000324223	15.0312	42389.1
6.66667	-0.036997						6.66667	-0.024256				1.4	-0.024116					0.66974	-0.000565622	16.1082	31347.3	0.6702	0.000322722	15.0396	42274.6
6.75	-0.023802						6.75	-0.015451				1.41667	-0.021146					0.67816	-0.000554103	16.1166	31324.8	0.67862	0.000288829	15.048	42156.8
6.83333	-0.015703						6.83333	-0.005258				1.43333	-0.018736					0.68657	-0.000534039	16.125	31230	0.68703	0.00023774	15.0565	42028
6.91667	-0.008832						6.91667	0.003912				1.45	-0.016906					0.69499	-0.00051412	16.1334	31141.7	0.69545	0.000198928	--	--
7	-0.002952						7	0.008449				1.46667	-0.015897					0.70341	-0.000498951	16.1418	31094.7	0.70387	0.000188431	--	--
7.08333	-0.003046						7.08333	0.008131				1.48333	-0.014957					0.71183	-0.000489346	16.1502	31013.1	0.71228	0.000196932	--	--
7.16667	-0.001226						7.16667	0.012778				1.5	-0.013899					0.72024	-0.000481362	16.1587	30980.5	0.7207	0.000207363	--	--
7.25	-0.001475						7.25	0.01602				1.51667	-0.012811					0.72866	-0.000471472	--	--	0.72912	0.000208258	--	--
7.33333	0.000896						7.33333	0.017086				1.53333	-0.011953					0.73708	-0.000460468	--	--	0.73754	0.00019461	--	--
7.41667	-0.000326						7.41667	0.009435				1.55	-0.011285					0.7455	-0.000445919	--	--	0.74595	0.000166875	--	--
7.5	-0.002514						7.5	0.011976				1.56667	-0.010387					0.75391	-0.000424588	--	--	0.75437	0.000131593	--	--
7.58333	-0.001289						7.58333	0.010099				1.58333	-0.009669					0.76233	-0.000399505	--	--	0.76279	9.43607e-05	--	--
7.66667	-0.004002						7.66667	0.009203				1.6	-0.008764					0.77075	-0.000374518	--	--	0.77121	5.2036e-05	--	--
7.75	-0.000764						7.75	0.006378				1.61667	-0.007809					0.77916	-0.000351296	--	--	0.77962	-1.29318e-06	--	--
7.83333	-0.000485						7.83333	0.004023				1.63333	-0.007153					0.78758	-0.000331299	--	--	0.78804	-6.66751e-05	--	--
7.91667	-0.000713						7.91667	0.008376				1.65	-0.006617					0.796	-0.000316749	--	--	0.79646	-0.000142567	--	--
8	-0.000808						8	0.005118				1.66667	-0.005802					0.80442	-0.000309933	--	--	0.80487	-0.000220066	--	--
8.08333	-0.035187						8.08333	-0.106443				1.68333	-0.004856					0.81283	-0.000312836	--	--	0.81329	-0.000285921	--	--
8.16667	-0.66729						8.16667	-0.251208				1.7	-0.004025					0.82125	-0.000324023	--	--	0.82171	-0.000333733	--	--
8.25	-0.705205						8.25	-0.261238				1.71667	-0.003663					0.82967	-0.000331643	--	--	0.83013	-0.000363118	--	--
8.33333	-0.29233						8.33333	-0.197254				1.73333	-0.00381					0.83809	-0.000323534	--	--	0.83854	-0.0003773	--	--
8.41667	-0.156435						8.41667	-0.119117				1.75	-0.003918					0.8465	-0.000304027	--	--	0.84696	-0.000378651	--	--
8.5	-0.093137						8.5	-0.076747				1.76667	-0.003096					0.85492	-0.000279686	--	--	0.85538	-0.000361453	--	--
8.58333	-0.057366						8.58333	-0.057056				1.78333	-0.002284					0.86334	-0.000250594	--	--	0.8638	-0.000315911	--	--
8.66667	-0.036589						8.66667	-0.040675				1.8	-0.001666					0.87175	-0.00021366	--	--	0.87221	-0.000247097
8.75	-0.023995						8.75	-0.025784				1.81667	-0.001898					0.88017	-0.000166438			0.88063	-0.000176243
8.83333	-0.016053						8.83333	-0.012265				1.83333	-0.00222					0.88859	-0.000111772			0.88905	-0.000116756
8.91667	-0.010441						8.91667	-0.018249				1.85	-0.002352					0.89701	-5.59695e-05			0.89746	-7.01315e-05
9	-0.008857						9	-0.010566				1.86667	-0.002144					0.90542	-4.22555e-06			0.90588	-3.57558e-05
9.08333	-0.004141						9.08333	-0.005097				1.88333	-0.001846					0.91384	4.04303e-05			0.9143	-1.63485e-05
9.16667	-0.00253						9.16667	-0.009424				1.9	-0.001363					0.92226	7.46435e-05			0.92272	-1.59986e-05
9.25	-0.002603						9.25	-0.006967				1.91667	-0.00105					0.93068	9.171e-05			0.93113	-3.5201e-05
9.33333	-0.001459						9.33333	-0.007827				1.93333	-0.001047					0.93909	9.00149e-05			0.93955	-6.36229e-05
9.41667	-0.000335						9.41667	-0.008116				1.95	-0.001533					0.94751	8.27578e-05			0.94797	-8.80899e-05
9.5	-0.001748						9.5	-0.009864				1.96667	-0.00158					0.95593	8.09058e-05			0.95639	-0.000105856
9.58333	0.004165						9.58333	-0.008591				1.98333	-0.001947					0.96434	7.96885e-05			0.9648	-0.000117655
9.66667	0.003137						9.66667	-0.011487				2	-0.00219					0.97276	7.15954e-05			0.97322	-0.000121745
9.75	0.0012						9.75	-0.010134				2.01667	-0.002712					0.98118	5.46791e-05			0.98164	-0.000118806
9.83333	0.000756						9.83333	-0.008119				2.03333	-0.003135					0.9896	3.60004e-05			0.99006	-0.000114828
9.91667	0.002326						9.91667	-0.010593				2.05	-0.003497					0.99801	2.50487e-05			0.99847	-0.000113189
10	0.005099						10	-0.016215				2.06667	-0.0036					1.00643	1.96921e-05			1.00689	-0.000107057
10.0833	-0.043744						10.0833	-0.137474				2.08333	-0.003522					1.01485	8.07672e-06			1.01531	-8.95054e-05
10.1667	-0.638395						10.1667	-0.27308				2.1	-0.004202					1.02327	-1.9663e-05			1.02372	-6.61225e-05
10.25	-0.605234						10.25	-0.23778				2.11667	-0.00478					1.03168	-5.79378e-05			1.03214	-4.35581e-05
10.3333	-0.284001						10.3333	-0.178034				2.13333	-0.004689					1.0401	-8.77691e-05			1.04056	-1.93021e-05
10.4167	-0.169427						10.4167	-0.129922				2.15	-0.002438					1.04852	-9.87878e-05			1.04898	9.98957e-06
10.5	-0.097892						10.5	-0.090781				2.16667	-0.000357					1.05693	-9.91542e-05			1.05739	3.92259e-05
10.5833	-0.060648						10.5833	-0.058212				2.18333	0.000374					1.06535	-9.89017e-05			1.06581	6.02399e-05
10.6667	-0.039524						10.6667	-0.034044				2.2	0.000597					1.07377	-0.000102664			1.07423	6.81023e-05
10.75	-0.026041						10.75	-0.018705				2.21667	0.001031					1.08219	-0.000112374			1.08265	6.68393e-05
10.8333	-0.018319						10.8333	-0.010634				2.23333	0.001975					1.0906	-0.00012378			1.09106	6.88397e-05
10.9167	-0.01134						10.9167	-0.002482				2.25	0.003599					1.09902	-0.0001266			1.09948	8.2082e-05
11	-0.007824						11	-0.001116				2.26667	0.006233					1.10744	-0.000116982			1.1079	0.000102957
11.0833	-0.003062						11.0833	0.000514				2.28333	0.010157					1.11586	-0.00010177			1.11631	0.000125817
11.1667	-0.004623						11.1667	0.003159				2.3	0.013642					1.12427	-8.98818e-05			1.12473	0.00014795
11.25	-0.003838						11.25	0.00423				2.31667	0.014728					1.13269	-8.82218e-05			1.13315	0.000169518
11.3333	-0.001729						11.3333	0.001658				2.33333	0.019254					1.14111	-0.000100968			1.14157	0.000192077
11.4167	-0.000333						11.4167	0.002563				2.35	0.00578					1.14952	-0.000123868			1.14998	0.000215571
11.5	-0.00077						11.5	0.002397				2.36667	-0.002824					1.15794	-0.000141615			1.1584	0.000238942
11.5833	0.002022						11.5833	0.002359				2.38333	-0.006089					1.16636	-0.00014268			1.16682	0.000263358
11.6667	0.000465						11.6667	0.004111				2.4	-0.006102					1.17478	-0.000126009			1.17524	0.000288038
11.75	0.002281						11.75	0.002743				2.41667	-0.006215					1.18319	-9.59946e-05			1.18365	0.000306584
11.8333	0.002309						11.8333	0.000846				2.43333	-0.005898					1.19161	-6.14727e-05			1.19207	0.000313448
11.9167	0.00362						11.9167	0.00337				2.45	-0.004911					1.20003	-3.14152e-05			1.20049	0.00030993
12	0.001733						12	-0.001926				2.46667	-0.004304					1.20845	-1.23673e-05			1.2089	0.000304613
12.0833	-0.058383						12.0833	-0.133019				2.48333	-0.004126					1.21686	-8.86816e-06			1.21732	0.000304267
12.1667	-0.60419						12.1667	-0.257282				2.5	-0.004689					1.22528	-2.25048e-05			1.22574	0.000311336
12.25	-0.521531						12.25	-0.220731				2.51667	-0.005022					1.2337	-4.6442e-05			1.23416	0.000325064
12.3333	-0.264217						12.3333	-0.165459				2.53333	-0.004544					1.24211	-7.0419e-05			1.24257	0.000339437
12.4167	-0.162991						12.4167	-0.119544				2.55	-0.003657					1.25053	-9.42574e-05			1.25099	0.000348602
12.5	-0.104964						12.5	-0.082326				2.56667	-0.002929					1.25895	-0.000130468			1.25941	0.0003483
12.5833	-0.06967						12.5833	-0.053065				2.58333	-0.002372					1.26737	-0.000191591			1.26783	0.000336668
12.6667	-0.045478						12.6667	-0.03388				2.6	-0.001905					1.27578	-0.000267168			1.27624	0.000316322
12.75	-0.032523						12.75	-0.020641				2.61667	-0.001657					1.2842	-0.00033376			1.28466	0.000294551
12.8333	-0.023366						12.8333	-0.013299				2.63333	-0.0015					1.29262	-0.000384176			1.29308	0.000286208
12.9167	-0.014159						12.9167	-0.006061				2.65	-0.001063					1.30104	-0.000423221			1.30149	0.00030718
13	-0.007254						13	-0.001729				2.66667	-0.000506					1.30945	-0.000453451			1.30991	0.000355773
13.0833	-0.004513						13.0833	-0.002532				2.68333	0.000131					1.31787	-0.00047032			1.31833	0.000414728
13.1667	-0.004328						13.1667	0.0011				2.7	0.000547					1.32629	-0.00046571			1.32675	0.000471706
13.25	-0.001782						13.25	0.000668				2.71667	0.000674					1.3347	-0.00043798			1.33516	0.000521155
13.3333	-0.002485						13.3333	0.001832				2.73333	0.00054					1.34312	-0.000396061			1.34358	0.000559472
13.4167	-0.00046						13.4167	0.001012				2.75	0.000566					1.35154	-0.000351579			1.352	0.000584605
13.5	0.000174						13.5	0.003329				2.76667	0.000682					1.35996	-0.000307533			1.36042	0.000597654
13.5833	-0.001925						13.5833	0.001242				2.78333	0.000839					1.36837	-0.000261144			1.36883	0.000609375
13.6667	-0.001117						13.6667	0.000512				2.8	0.000714					1.37679	-0.000210602			1.37725	0.000637127
13.75	-6.1e-05						13.75	0.001579				2.81667	0.000449					1.38521	-0.000152162			1.38567	0.000685441
13.8333	-0.000636						13.8333	-0.000617				2.83333	0.000244					1.39363	-8.20174e-05			1.39408	0.000743409
13.9167	-6.2e-05						13.9167	-0.001436				2.85	-0.000292					1.40204	-5.90178e-06			1.4025	0.000803833
14	-0.000788						14	-0.004998				2.86667	-0.000807					1.41046	6.41759e-05			1.41092	0.000865692
14.0833	-0.065142						14.0833	-0.140922				2.88333	-0.001372					1.41888	0.000121185			1.41934	0.000925059
14.1667	-0.550164						14.1667	-0.25055				2.9	-0.001639					1.42729	0.000164777			1.42775	0.000977177
14.25	-0.510363						14.25	-0.22668				2.91667	-0.001456					1.43571	0.000196544			1.43617	0.00102
14.3333	-0.282637						14.3333	-0.168983				2.93333	-0.001114					1.44413	0.000211497			1.44459	0.00104
14.4167	-0.178555						14.4167	-0.119939				2.95	-0.000671					1.45255	0.000201606			1.45301	0.00103
14.5	-0.109077						14.5	-0.085158				2.96667	-0.000229					1.46096	0.000165522			1.46142	0.00101
14.5833	-0.068881						14.5833	-0.059359				2.98333	4.4e-05					1.46938	0.000111124			1.46984	0.000993307
14.6667	-0.042776						14.6667	-0.041393				3	1.5e-05					1.4778	6.04982e-05			1.47826	0.000976024
14.75	-0.030322						14.75	-0.030029				3.01667	-0.000235					1.48622	3.35719e-05			1.48667	0.000960726
14.8333	-0.018576						14.8333	-0.019539				3.03333	-0.000655					1.49463	2.81326e-05			1.49509	0.000942087
14.9167	-0.013759						14.9167	-0.01353				3.05	-0.000935					1.50305	3.39061e-05			1.50351	0.000904912
15	-0.009139						15	-0.005674				3.06667	-0.001225					1.51147	4.42276e-05			1.51193	0.000837493
15.0833	-0.005935						15.0833	-0.003451				3.08333	-0.001655					1.51988	5.45293e-05			1.52034	0.000751976
15.1667	-0.002425						15.1667	0.00026				3.1	-0.001916					1.5283	6.14936e-05			1.52876	0.000667055
15.25	0.000211						15.25	0.000709				3.11667	-0.001927					1.53672	6.25114e-05			1.53718	0.000591386
15.3333	-0.001136						15.3333	0.000735				3.13333	-0.001599					1.54514	5.36194e-05			1.5456	0.000531678
15.4167	-0.002575						15.4167	0.00062				3.15	-0.00113					1.55355	3.24092e-05			1.55401	0.00049231
15.5	0.000177						15.5	0.000891				3.16667	-0.000901					1.56197	3.067e-06			1.56243	0.0004669
15.5833	0.001571						15.5833	-0.000779				3.18333	-0.000513					1.57039	-3.23593e-05			1.57085	0.000445387
15.6667	-0.001741						15.6667	0.003229				3.2	-6.3e-05					1.57881	-7.5056e-05			1.57926	0.000422457
15.75	0.000184						15.75	0.002084				3.21667	0.000317					1.58722	-0.000120529			1.58768	0.000400101
15.8333	0.004048						15.8333	0.003037				3.23333	0.000676					1.59564	-0.000160088			1.5961	0.000382803
15.9167	0.002773						15.9167	0.008528				3.25	0.001036					1.60406	-0.000187196			1.60452	0.00036967
16	-0.00094						16	-0.006633				3.26667	0.001416					1.61247	-0.0002019			1.61293	0.000353876
16.0833	-0.056421						16.0833	-0.150747				3.28333	0.001485					1.62089	-0.000211765			1.62135	0.000329021
16.1667	-0.442051						16.1667	-0.219684				3.3	0.001418					1.62931	-0.000224345			1.62977	0.000298152
16.25	-0.437219						16.25	-0.213534				3.31667	0.001032					1.63773	-0.000243645			1.63819	0.000274996
16.3333	-0.276495						16.3333	-0.159407				3.33333	0.000516					1.64614	-0.00027027			1.6466	0.000271935
16.4167	-0.18431						16.4167	-0.105834				3.35	0.00026					1.65456	-0.000301473			1.65502	0.000287453
16.5	-0.113864						16.5	-0.072805				3.36667	0.000684					1.66298	-0.000323933			1.66344	0.000313984
16.5833	-0.073357						16.5833	-0.048999				3.38333	0.001487					1.6714	-0.000320169			1.67185	0.000347921
16.6667	-0.04995						16.6667	-0.033968				3.4	0.001806					1.67981	-0.000292548			1.68027	0.00038508
16.75	-0.032851						16.75	-0.02218				3.41667	0.001915					1.68823	-0.000257225			1.68869	0.00041819
16.8333	-0.022202						16.8333	-0.010818				3.43333	0.002125					1.69665	-0.000224964			1.69711	0.000439972
16.9167	-0.016093						16.9167	-0.00124				3.45	0.001915					1.70507	-0.0002			1.70552	0.000446131
17	-0.010273						17	-0.001157				3.46667	0.001214					1.71348	-0.000181986			1.71394	0.000437274
17.0833	-0.004664						17.0833	0.001631				3.48333	-0.001696					1.7219	-0.000162687			1.72236	0.000419703
17.1667	-0.006554						17.1667	0.003923				3.5	-0.005772					1.73032	-0.000129952			1.73078	0.000401209
17.25	-0.003506						17.25	0.00274				3.51667	-0.007476					1.73873	-8.55334e-05			1.73919	0.00038653
17.3333	-0.003367						17.3333	0.006552				3.53333	-0.012821					1.74715	-4.49377e-05			1.74761	0.000374718
17.4167	-0.001419						17.4167	0.008377				3.55	-0.045405					1.75557	-1.825e-05			1.75603	0.000363165
17.5	0.002729						17.5	0.010226				3.56667	-0.1588					1.76399	-5.22155e-06			1.76444	0.00034951
17.5833	0.001489						17.5833	0.012819				3.58333	-0.384514					1.7724	-1.65308e-06			1.77286	0.00032932
17.6667	0.001382						17.6667	0.007705				3.6	-0.688345					1.78082	-6.78695e-06			1.78128	0.000297305
17.75	-0.000183						17.75	0.006415				3.61667	-0.991554					1.78924	-1.92372e-05			1.7897	0.000250766
17.8333	0.001684						17.8333	0.011267				3.63333	-1.19212					1.79766	-3.19658e-05			1.79811	0.000189105
17.9167	0.000942						17.9167	0.004082				3.65	-1.23453					1.80607	-3.77924e-05			1.80653	0.000117512
18	0.004362						18	-0.01723				3.66667	-1.13673					1.81449	-3.56702e-05			1.81495	4.71701e-05
18.0833	-0.050309						18.0833	-0.163882				3.68333	-0.951322					1.82291	-3.06703e-05			1.82337	-1.62608e-05
18.1667	-0.339632						18.1667	-0.216903				3.7	-0.748458					1.83132	-2.83808e-05			1.83178	-7.39546e-05
18.25	-0.323996						18.25	-0.212255				3.71667	-0.580733					1.83974	-3.17264e-05			1.8402	-0.000125381
18.3333	-0.229604						18.3333	-0.146997				3.73333	-0.455528					1.84816	-4.26197e-05			1.84862	-0.000165878
18.4167	-0.165677						18.4167	-0.103211				3.75	-0.362803					1.85658	-6.45309e-05			1.85703	-0.000195894
18.5	-0.111485						18.5	-0.076768				3.76667	-0.303258					1.86499	-0.000102074			1.86545	-0.00022196
18.5833	-0.07554						18.5833	-0.053527				3.78333	-0.253954					1.87341	-0.000151031			1.87387	-0.00024931
18.6667	-0.050032						18.6667	-0.042451				3.8	-0.222596					1.88183	-0.000196954			1.88229	-0.000281505
18.75	-0.034632						18.75	-0.024218				3.81667	-0.194818					1.89025	-0.000231684			1.8907	-0.000323108
18.8333	-0.025882						18.8333	-0.018692				3.83333	-0.177499					1.89866	-0.000256003			1.89912	-0.000374593
18.9167	-0.015633						18.9167	-0.013551				3.85	-0.162251					1.90708	-0.000271157			1.90754	-0.000425397
19	-0.008236						19	-0.011297				3.86667	-0.146322					1.9155	-0.000278204			1.91596	-0.000461659
19.0833	-0.006551						19.0833	-0.0092				3.88333	-0.132994					1.92391	-0.000279086			1.92437	-0.000473959
19.1667	-0.00633						19.1667	-0.007701				3.9	-0.123834					1.93233	-0.000272797			1.93279	-0.000459628
19.25	-0.003694						19.25	-0.008932				3.91667	-0.114553					1.94075	-0.000258935			1.94121	-0.000426231
19.3333	0.000426						19.3333	-0.008241				3.93333	-0.102982					1.94917	-0.00024381			1.94962	-0.00038703
19.4167	-0.000258						19.4167	-0.008631				3.95	-0.092841					1.95758	-0.000234524			1.95804	-0.000351009
19.5	-0.001279						19.5	-0.011032				3.96667	-0.08453					1.966	-0.000232023			1.96646	-0.000317599
19.5833	0.000766						19.5833	-0.012645				3.98333	-0.072559					1.97442	-0.000228842			1.97488	-0.000283134
19.6667	0.000417						19.6667	-0.01193				4	-0.059406					1.98284	-0.000215234			1.98329	-0.00024807
19.75	0.001114						19.75	-0.015019				4.01667	-0.051793					1.99125	-0.000187707			1.99171	-0.000213627
19.8333	0.001977						19.8333	-0.01094				4.03333	-0.04666					1.99967	-0.000148183			2.00013	-0.000180277
19.9167	0.001327						19.9167	-0.012065				4.05	-0.043667					2.00809	-0.000104738			2.00855	-0.000149718
20	0.000892						20	-0.041844				4.06667	-0.040614					2.0165	-6.49558e-05			2.01696	-0.000125293
20.0833	-0.051008						20.0833	-0.203675				4.08333	-0.037572					2.02492	-3.12835e-05			2.02538	-0.000110938
20.1667	-0.250143						20.1667	-0.229419				4.1	-0.033411					2.03334	-2.28507e-06			2.0338	-0.00010328
20.25	-0.229756						20.25	-0.205975				4.11667	-0.029379					2.04176	2.44927e-05			2.04222	-9.23669e-05
20.3333	-0.174987						20.3333	-0.164142				4.13333	-0.025437					2.05017	4.91224e-05			2.05063	-7.78299e-05
20.4167	-0.126106						20.4167	-0.12304				4.15	-0.020885					2.05859	6.99891e-05			2.05905	-6.64903e-05
20.5	-0.079314						20.5	-0.091969				4.16667	-0.016993					2.06701	8.39706e-05			2.06747	-6.17007e-05
20.5833	-0.055792						20.5833	-0.068178				4.18333	-0.013771					2.07543	8.65932e-05			2.07588	-5.70611e-05
20.6667	-0.037362						20.6667	-0.049838				4.2	-0.011584					2.08384	7.45337e-05			2.0843	-4.43535e-05
20.75	-0.024553						20.75	-0.031907				4.21667	-0.009818					2.09226	4.66863e-05			2.09272	-2.56555e-05
20.8333	-0.016977						20.8333	-0.023435				4.23333	-0.008203					2.10068	9.47401e-06			2.10114	-6.80006e-06
20.9167	-0.011415						20.9167	-0.014982				4.25	-0.006807					2.10909	-2.4803e-05			2.10955	1.04711e-05
21	-0.009117						21	-0.008597				4.26667	-0.005772					2.11751	-5.21065e-05			2.11797	2.75509e-05
21.0833	-0.007234						21.0833	-0.006961				4.28333	-0.004576					2.12593	-7.44977e-05			2.12639	4.68805e-05
21.1667	-0.005078						21.1667	-0.006542				4.3	-0.003271					2.13435	-9.22301e-05			2.13481	6.86597e-05
21.25	-0.004599						21.25	-0.00641				4.31667	-0.002009					2.14276	-0.000100996			2.14322	8.84412e-05
21.3333	-0.001917						21.3333	-0.003866				4.33333	-0.001236					2.15118	-9.23314e-05			2.15164	0.000100873
21.4167	-0.001471						21.4167	0.000832				4.35	-0.000814					2.1596	-6.36728e-05			2.16006	0.000100483
21.5	-0.000651						21.5	0.003304				4.36667	-0.000391					2.16802	-2.54331e-05			2.16847	8.08007e-05
21.5833	0.000246						21.5833	0.000531				4.38333	-9.9e-05					2.17643	9.78679e-06			2.17689	3.76656e-05
21.6667	0.000813						21.6667	0.000692				4.4	-0.00026					2.18485	3.22328e-05			2.18531	-2.56946e-05
21.75	0.002301						21.75	-0.000273				4.41667	-0.000513					2.19327	3.33461e-05			2.19373	-9.29834e-05
21.8333	0.001063						21.8333	0.002299				4.43333	-0.000875					2.20168	9.41523e-06			2.20214	-0.000144547
21.9167	-0.000501						21.9167	-0.001624				4.45	-0.001358					2.2101	-3.28405e-05			2.21056	-0.000174398
22	0.000181						22	-0.026571				4.46667	-0.00171					2.21852	-7.89777e-05			2.21898	-0.00018915
22.0833	-0.029981						22.0833	-0.190772				4.48333	-0.001983					2.22694	-0.000118798			2.2274	-0.000199181
22.1667	-0.143176						22.1667	-0.216105				4.5	-0.001891					2.23535	-0.000141829			2.23581	-0.000214486
22.25	-0.133504						22.25	-0.184632				4.51667	-0.002022					2.24377	-0.000137901			2.24423	-0.000246832
22.3333	-0.101243						22.3333	-0.142571				4.53333	-0.002113					2.25219	-0.000111476			2.25265	-0.000299206
22.4167	-0.071183						22.4167	-0.112742				4.55	-0.002014					2.26061	-7.86586e-05			2.26106	-0.000351954
22.5	-0.045462						22.5	-0.082576				4.56667	-0.001735					2.26902	-5.22013e-05			2.26948	-0.000384098
22.5833	-0.027822						22.5833	-0.05616				4.58333	-0.001006					2.27744	-3.59887e-05			2.2779	-0.000396864
22.6667	-0.01708						22.6667	-0.037926				4.6	-0.000419					2.28586	-2.94981e-05			2.28632	-0.000397179
22.75	-0.010525						22.75	-0.022863				4.61667	-0.000235					2.29427	-3.0171e-05			2.29473	-0.000387496
22.8333	-0.005638						22.8333	-0.019871				4.63333	-0.00046					2.30269	-3.54454e-05			2.30315	-0.000371846
22.9167	-0.003798						22.9167	-0.011769				4.65	-0.000866					2.31111	-4.4622e-05			2.31157	-0.000355006
23	-0.002593						23	-0.006907				4.66667	-0.001301					2.31953	-4.979e-05			2.31999	-0.000340709
23.0833	-0.001983						23.0833	-0.007644				4.68333	-0.001837					2.32794	-3.1163e-05			2.3284	-0.000331443
23.1667	-0.000387						23.1667	-0.003671				4.7	-0.002109					2.33636	2.13885e-05			2.33682	-0.000328334
23.25	0.002355						23.25	-0.001896				4.71667	-0.002136					2.34478	9.09561e-05			2.34524	-0.000328595
23.3333	0.000945						23.3333	-0.002281				4.73333	-0.002163					2.3532	0.000153283			2.35365	-0.000322717
23.4167	-0.001058						23.4167	-0.000303				4.75	-0.002299					2.36161	0.000193403			2.36207	-0.000301401
23.5	-0.000315						23.5	-0.002244				4.76667	-0.002356					2.37003	0.000209593			2.37049	-0.00026553
23.5833	-0.000105						23.5833	0.001368				4.78333	-0.002093					2.37845	0.000209914			2.37891	-0.000222396
23.6667	0.001162						23.6667	0.000602				4.8	-0.001582					2.38686	0.000203796			2.38732	-0.00018048
23.75	0.000545						23.75	0.00129				4.81667	-0.000973					2.39528	0.000194299			2.39574	-0.000145972
23.8333	-0.000726						23.8333	0.001851				4.83333	-0.000443					2.4037	0.000180547			2.40416	-0.000123026
23.9167	0.001949						23.9167	-0.001595				4.85	0.000376					2.41212	0.000162228			2.41258	-0.000116176
24	0.001969						24	-0.042407				4.86667	0.000976					2.42053	0.000138774			2.42099	-0.000125835
24.0833	-0.026085						24.0833	-0.201704				4.88333	0.001335					2.42895	0.000112885			2.42941	-0.000143407
24.1667	-0.086455						24.1667	-0.212348				4.9	0.001333					2.43737	8.89549e-05			2.43783	-0.000160575
24.25	-0.068851						24.25	-0.178856				4.91667	0.00056					2.44579	6.36105e-05			2.44624	-0.000178202
24.3333	-0.055182						24.3333	-0.13084				4.93333	-0.000413					2.4542	2.93744e-05			2.45466	-0.000201198
24.4167	-0.037479						24.4167	-0.097208				4.95	-0.000975					2.46262	-1.67504e-05			2.46308	-0.000233476
24.5	-0.023453						24.5	-0.069321				4.96667	-0.001308					2.47104	-6.63651e-05			2.4715	-0.000265327
24.5833	-0.016894						24.5833	-0.051808				4.98333	-0.001421					2.47945	-0.000109444			2.47991	-0.000272555
24.6667	-0.009282						24.6667	-0.038389				5	-0.001274					2.48787	-0.000149245			2.48833	-0.000249673
24.75	-0.004758						24.75	-0.026984				5.01667	-0.000898					2.49629	-0.000195574			2.49675	-0.000215496
24.8333	-0.001571						24.8333	-0.020012				5.03333	-0.000212					2.50471	-0.000252214			2.50517	-0.000184691
24.9167	4.8e-05						24.9167	-0.014483				5.05	0.000335					2.51312	-0.00031468			2.51358	-0.000162719
25	-0.003391						25	-0.011017				5.06667	0.000421					2.52154	-0.00037414			2.522	-0.000150431
25.0833	-0.001749						25.0833	-0.005854				5.08333	0.000608					2.52996	-0.000423492			2.53042	-0.000145103
25.1667	-0.001316						25.1667	-0.002494				5.1	0.000635					2.53838	-0.000460609			2.53883	-0.00014884
25.25	-0.000883						25.25	-0.001175				5.11667	0.000623					2.54679	-0.000487671			2.54725	-0.000170853
25.3333	0.000401						25.3333	-0.002318				5.13333	0.000571					2.55521	-0.00050402			2.55567	-0.000214703
25.4167	0.001706						25.4167	-0.001522				5.15	0.000508					2.56363	-0.000508328			2.56409	-0.000269198
25.5	0.000481						25.5	0.000262				5.16667	0.000456					2.57204	-0.000503235			2.5725	-0.000317282
25.5833	0.000445						25.5833	0.001105				5.18333	0.000364					2.58046	-0.000486881			2.58092	-0.000348261
25.6667	-0.001352						25.6667	0.002717				5.2	0.000164					2.58888	-0.000450007			2.58934	-0.000365361
25.75	-0.000932						25.75	0.002629				5.21667	-4.5e-05					2.5973	-0.000386477			2.59776	-0.000380387
25.8333	0.000465						25.8333	0.000641				5.23333	-0.000114					2.60571	-0.000302437			2.60617	-0.000401354
25.9167	0.000239						25.9167	0.001282				5.25	6.7e-05					2.61413	-0.000209268			2.61459	-0.000424332
26	-0.000921						26	-0.087046				5.26667	0.000198					2.62255	-0.000116283			2.62301	-0.000438664
26.0833	-0.026295						26.0833	-0.192264				5.28333	0.000349					2.63097	-3.78673e-05			2.63142	-0.000441667
26.1667	-0.062694						26.1667	-0.192263				5.3	0.000483					2.63938	9.49229e-06			2.63984	-0.00044094
26.25	-0.043808						26.25	-0.162881				5.31667	0.000629					2.6478	1.90438e-05			2.64826	-0.000445655
26.3333	-0.032188						26.3333	-0.115989				5.33333	0.000784					2.65622	5.65211e-06			2.65668	-0.00046325
26.4167	-0.024913						26.4167	-0.084727				5.35	0.00081					2.66463	2.69692e-06			2.66509	-0.000488124
26.5	-0.018375						26.5	-0.067065				5.36667	0.000635					2.67305	2.23862e-05			2.67351	-0.000501749
26.5833	-0.014364						26.5833	-0.046412				5.38333	0.000611					2.68147	4.65138e-05			2.68193	-0.00049819
26.6667	-0.00946						26.6667	-0.029898				5.4	0.00051					2.68989	5.85575e-05			2.69035	-0.000485304
26.75	-0.006964						26.75	-0.023254				5.41667	0.000651					2.6983	5.30911e-05			2.69876	-0.000469859
26.8333	-0.004336						26.8333	-0.010889				5.43333	0.000602					2.70672	3.22245e-05			2.70718	-0.000455333
26.9167	-0.004606						26.9167	-0.006474				5.45	0.000373					2.71514	4.72425e-06			2.7156	-0.000442623
27	-0.001656						27	-0.003897				5.46667	6.4e-05					2.72356	-1.99627e-05			2.72401	-0.000430411
27.0833	0.000175						27.0833	-0.0021				5.48333	-0.000125					2.73197	-4.0479e-05			2.73243	-0.000419338
27.1667	0.000427						27.1667	-0.000552				5.5	-0.00014					2.74039	-6.06746e-05			2.74085	-0.000414089
27.25	-0.000852						27.25	0.003028				5.51667	-0.000114					2.74881	-8.48227e-05			2.74927	-0.000418002
27.3333	-0.000872						27.3333	0.003509				5.53333	-9.7e-05					2.75722	-0.00011015			2.75768	-0.000429581
27.4167	-0.000603						27.4167	0.004111				5.55	-9.1e-05					2.76564	-0.000117218			2.7661	-0.000444095
27.5	0.001146						27.5	0.005894				5.56667	2.6e-05					2.77406	-8.52274e-05			2.77452	-0.000458298
27.5833	-0.000216						27.5833	0.004478				5.58333	0.000582					2.78248	-1.85536e-05			2.78294	-0.000467525
27.6667	-0.001918						27.6667	0.007463				5.6	0.001142					2.79089	5.73048e-05			2.79135	-0.000464157
27.75	0.00055						27.75	0.005568				5.61667	0.001124					2.79931	0.000118598			2.79977	-0.000446978
27.8333	-0.000371						27.8333	0.003644				5.63333	0.000946					2.80773	0.000153597			2.80819	-0.000424158
27.9167	-0.000881						27.9167	0.004098				5.65	0.000578					2.81615	0.000158662			2.8166	-0.000405856
28	-0.002839						28	-0.08723				5.66667	-5.1e-05					2.82456	0.000140857			2.82502	-0.000398707
28.0833	-0.025223						28.0833	-0.16312				5.68333	-0.000519					2.83298	0.000116769			2.83344	-0.000403552
28.1667	-0.041575						28.1667	-0.182414				5.7	-0.000574					2.8414	0.000100171			2.84186	-0.000418629
28.25	-0.026582						28.25	-0.153743				5.71667	-0.000547					2.84981	9.64842e-05			2.85027	-0.000441455
28.3333	-0.015784						28.3333	-0.109386				5.73333	-0.000381					2.85823	0.000102726			2.85869	-0.000468169
28.4167	-0.008811						28.4167	-0.085076				5.75	-0.000235					2.86665	0.000110495			2.86711	-0.000496497
28.5	-0.00565						28.5	-0.066112				5.76667	1.2e-05					2.87507	0.000114237			2.87553	-0.000524917
28.5833	-0.004573						28.5833	-0.047197				5.78333	0.000388					2.88348	0.000113592			2.88394	-0.000551773
28.6667	-0.003108						28.6667	-0.034059				5.8	0.000597					2.8919	0.000110436			2.89236	-0.000578249
28.75	-0.003654						28.75	-0.026731				5.81667	0.000498					2.90032	0.00010593			2.90078	-0.00060724
28.8333	-0.003061						28.8333	-0.018474				5.83333	0.000128					2.90874	0.000103597			2.90919	-0.000636075
28.9167	-0.002747						28.9167	-0.014687				5.85	-0.000402					2.91715	0.000108612			2.91761	-0.000658216
29	-0.000421						29	-0.012222				5.86667	-0.000562					2.92557	0.000122494			2.92603	-0.000675379
29.0833	0.00091						29.0833	-0.009599				5.88333	-0.000881					2.93399	0.000144965			2.93445	-0.000693075
29.1667	0.002089						29.1667	-0.00932				5.9	-0.001049					2.9424	0.000177838			2.94286	-0.000714128
29.25	0.002469						29.25	-0.008845				5.91667	-0.000425					2.95082	0.000225854			2.95128	-0.000734424
29.3333	0.00061						29.3333	-0.007946				5.93333	0.000738					2.95924	0.000290787			2.9597	-0.000744963
29.4167	0.002756						29.4167	-0.010112				5.95	0.001052					2.96766	0.000365884			2.96812	-0.000745153
29.5	0.000496						29.5	-0.011015				5.96667	4.5e-05					2.97607	0.000447683			2.97653	-0.000741738
29.5833	0.001831						29.5833	-0.009905				5.98333	-0.002271					2.98449	0.000536796			2.98495	-0.000738548
29.6667	-0.001611						29.6667	-0.008553				6	-0.005316					2.99291	0.000626259			2.99337	-0.000734368
29.75	-0.00147						29.75	-0.010021				6.01667	-0.00569					3.00133	0.000703982			3.00178	-0.000727027
29.8333	-0.003366						29.8333	-0.012337				6.03333	-0.008124					3.00974	0.000761325			3.0102	-0.000715634
29.9167	0.0002						29.9167	-0.015973				6.05	-0.044967					3.01816	0.000794412			3.01862	-0.00069685
30	-0.0023						30	-0.117168				6.06667	-0.174581					3.02658	0.000803048			3.02704	-0.000668709
30.0833	-0.027535						30.0833	-0.189762				6.08333	-0.396135					3.03499	0.000791874			3.03545	-0.000636289
30.1667	-0.027574						30.1667	-0.191236				6.1	-0.668347					3.04341	0.000768596			3.04387	-0.000604385
30.25	-0.016985						30.25	-0.156388				6.11667	-0.928289					3.05183	0.00073962			3.05229	-0.000572695
30.3333	-0.013498						30.3333	-0.12387				6.13333	-1.09339					3.06025	0.000704852			3.06071	-0.000538192
30.4167	-0.00888						30.4167	-0.104511				6.15	-1.12511					3.06866	0.000663654			3.06912	-0.000499041
30.5	-0.003691						30.5	-0.08513				6.16667	-1.03501					3.07708	0.000621611			3.07754	-0.000457473
30.5833	0.00696						30.5833	-0.067879				6.18333	-0.881886					3.0855	0.000584822			3.08596	-0.000418184
30.6667	0.012526						30.6667	-0.051507				6.2	-0.721826					3.09392	0.000556817			3.09437	-0.000382924
30.75	0.012098						30.75	-0.043694				6.21667	-0.591246					3.10233	0.000538341			3.10279	-0.000347737
30.8333	0.011165						30.8333	-0.03319				6.23333	-0.494726					3.11075	0.000528548			3.11121	-0.000303814
30.9167	0.010301						30.9167	-0.023295				6.25	-0.411506					3.11917	0.000528409			3.11963	-0.000249703
31	0.009655						31	-0.014609				6.26667	-0.344686					3.12758	0.000537717			3.12804	-0.00019704
31.0833	0.008536						31.0833	-0.014362				6.28333	-0.291576					3.136	0.000550447			3.13646	-0.0001555
31.1667	0.000186						31.1667	-0.009224				6.3	-0.251626					3.14442	0.000562084			3.14488	-0.000127056
31.25	-0.002313						31.25	-0.006795				6.31667	-0.220145					3.15284	0.000573341			3.1533	-0.000103231
31.3333	-0.007019						31.3333	-0.011475				6.33333	-0.192344					3.16125	0.000584983			3.16171	-7.29921e-05
31.4167	-0.005401						31.4167	-0.011084				6.35	-0.165963					3.16967	0.000591253			3.17013	-3.95695e-05
31.5	-0.004346						31.5	-0.003102				6.36667	-0.143972					3.17809	0.000586076			3.17855	-1.19821e-05
31.5833	-0.002707						31.5833	-0.006469				6.38333	-0.130341					3.18651	0.000574243			3.18697	6.38391e-06
31.6667	-0.001756						31.6667	-0.005525				6.4	-0.12189					3.19492	0.000566601			3.19538	1.89573e-05
31.75	-0.001836						31.75	-0.00521				6.41667	-0.114108					3.20334	0.00056761			3.2038	3.01807e-05
31.8333	-0.001956						31.8333	-0.001884				6.43333	-0.106287					3.21176	0.000575667			3.21222	3.47452e-05
31.9167	0.001823						31.9167	-0.004456				6.45	-0.098675					3.22017	0.000587407			3.22063	2.41756e-05
32	8.3e-05						32	-0.109706				6.46667	-0.090554					3.22859	0.000599216			3.22905	2.22915e-06
32.0833	-0.021747						32.0833	-0.187795				6.48333	-0.083412					3.23701	0.000608449			3.23747	-2.01137e-05
32.1667	-0.013924						32.1667	-0.16229				6.5	-0.075693					3.24543	0.000611656			3.24589	-3.75909e-05
32.25	-0.005419						32.25	-0.134823				6.51667	-0.066994					3.25384	0.000605033			3.2543	-4.87572e-05
32.3333	-0.00191						32.3333	-0.106123				6.53333	-0.058926					3.26226	0.000594323			3.26272	-5.45837e-05
32.4167	-0.000888						32.4167	-0.081909				6.55	-0.052158					3.27068	0.000591865			3.27114	-5.94361e-05
32.5	-0.00054						32.5	-0.060521				6.56667	-0.045849					3.2791	0.000598579			3.27956	-6.50753e-05
32.5833	0.001054						32.5833	-0.04387				6.58333	-0.040351					3.28751	0.000607616			3.28797	-6.7061e-05
32.6667	-0.000826						32.6667	-0.031403				6.6	-0.0369					3.29593	0.000614219			3.29639	-6.24051e-05
32.75	-0.000789						32.75	-0.021132				6.61667	-0.032499					3.30435	0.000615325			3.30481	-5.69272e-05
32.8333	0.001096						32.8333	-0.014516				6.63333	-0.029338					3.31276	0.000604208			3.31322	-5.75033e-05
32.9167	-0.00118						32.9167	-0.009605				6.65	-0.026467					3.32118	0.000577592			3.32164	-6.90915e-05
33	0.002004						33	-0.009137				6.66667	-0.023646					3.3296	0.000550278			3.33006	-9.0399e-05
33.0833	-8.3e-05						33.0833	-0.004314				6.68333	-0.020885					3.33802	0.000538994			3.33848	-0.0001096
33.1667	0.001702						33.1667	-0.001554				6.7	-0.017717					3.34643	0.000541277			3.34689	-0.000118476
33.25	0.001297						33.25	-0.002758				6.71667	-0.014674					3.35485	0.000547217			3.35531	-0.000121107
33.3333	0.002523						33.3333	-0.000124				6.73333	-0.012031					3.36327	0.000551377			3.36373	-0.000123812
33.4167	0.000789						33.4167	0.001157				6.75	-0.009817					3.37169	0.000551205			3.37215	-0.000130411
33.5	-0.000947						33.5	-6.5e-05				6.76667	-0.007574					3.3801	0.000544113			3.38056	-0.000143868
33.5833	-0.003447						33.5833	0.001432				6.78333	-0.005501					3.38852	0.000525588			3.38898	-0.000165617
33.6667	-0.002693						33.6667	0.000716				6.8	-0.004666					3.39694	0.000488836			3.3974	-0.000192215
33.75	-0.002054						33.75	0.00016				6.81667	-0.004609					3.40536	0.00043366			3.40581	-0.000218627
33.8333	-0.00043						33.8333	0.003162				6.83333	-0.004833					3.41377	0.000371213			3.41423	-0.000244949
33.9167	-0.00073						33.9167	-0.004686				6.85	-0.005227					3.42219	0.000311379			3.42265	-0.000274087
34	-0.003353						34	-0.125856				6.86667	-0.00571					3.43061	0.000256043			3.43107	-0.000305473
34.0833	-0.025456						34.0833	-0.175735				6.88333	-0.006504					3.43902	0.00020799			3.43948	-0.000336114
34.1667	-0.021829						34.1667	-0.152945				6.9	-0.0061					3.44744	0.00017474			3.4479	-0.000366817
34.25	-0.012989						34.25	-0.119504				6.91667	-0.00422					3.45586	0.000156735			3.45632	-0.000406159
34.3333	-0.008225						34.3333	-0.091394				6.93333	-0.002151					3.46428	0.000144974			3.46474	-0.000462275
34.4167	-0.005316						34.4167	-0.073232				6.95	-0.000242					3.47269	0.000130305			3.47315	-0.000529533
34.5	-0.003581						34.5	-0.05529				6.96667	0.001177					3.48111	0.000107392			3.48157	-0.000592809
34.5833	-0.003366						34.5833	-0.040196				6.98333	0.002096					3.48953	7.89008e-05			3.48999	-0.000642179
34.6667	-0.004222						34.6667	-0.030411				7	0.002045					3.49795	5.68624e-05			3.4984	-0.000682213
34.75	-0.002206						34.75	-0.022534				7.01667	0.001253					3.50636	4.86015e-05			3.50682	-0.000721724
34.8333	-0.000987						34.8333	-0.014656				7.03333	0.000352					3.51478	5.15743e-05			3.51524	-0.000760579
34.9167	0.001927						34.9167	-0.010295				7.05	-0.000349					3.5232	6.11909e-05			3.52366	-0.000790857
35	0.002427						35	-0.006051				7.06667	-0.000841					3.53161	7.49598e-05			3.53207	-0.000806904
35.0833	0.002484						35.0833	-0.004785				7.08333	-0.001002					3.54003	9.50148e-05			3.54049	-0.000807587
35.1667	2e-05						35.1667	-0.002876				7.1	-0.000737					3.54845	0.000127235			3.54891	-0.000788413
35.25	0.001722						35.25	-0.002324				7.11667	-0.000338					3.55687	0.000170986			3.55733	-0.000750249
35.3333	-0.000249						35.3333	0.001171				7.13333	-0.000339					3.56528	0.000216091			3.56574	-0.000708207
35.4167	-0.002434						35.4167	0.001651				7.15	-0.00036					3.5737	0.000256539			3.57416	-0.000675422
35.5	-0.001635						35.5	-0.001736				7.16667	-8.1e-05					3.58212	0.000295601			3.58258	-0.000656115
35.5833	-0.000692						35.5833	0.000871				7.18333	-0.000322					3.59054	0.000336057			3.59099	-0.000646471
35.6667	-0.000774						35.6667	0.005233				7.2	-0.000676					3.59895	0.000373207			3.59941	-0.000639013
35.75	-0.001982						35.75	0.00383				7.21667	-0.000731					3.60737	0.000402412			3.60783	-0.00062873
35.8333	0.004697						35.8333	0.000942				7.23333	-0.000736					3.61579	0.000424782			3.61625	-0.000615226
35.9167	0.005522						35.9167	-0.027912				7.25	-0.001081					3.6242	0.00044444			3.62466	-0.000603804
36	-0.001056						36	-0.14622				7.26667	-0.000836					3.63262	0.000462175			3.63308	-0.000599386
36.0833	-0.023146						36.0833	-0.147634				7.28333	-0.000921					3.64104	0.000477038			3.6415	-0.00059672
36.1667	-0.01374						36.1667	-0.145202				7.3	-0.001079					3.64946	0.000489616			3.64992	-0.000584072
36.25	-0.012617						36.25	-0.105235				7.31667	-0.000689					3.65787	0.000501915			3.65833	-0.000559745
36.3333	-0.009477						36.3333	-0.083123				7.33333	-0.000178					3.66629	0.000514571			3.66675	-0.000534231
36.4167	-0.006741						36.4167	-0.069616				7.35	8.2e-05					3.67471	0.00052441			3.67517	-0.000516345
36.5	-0.002508						36.5	-0.050893				7.36667	-3.8e-05					3.68313	0.000526217			3.68358	-0.000505863
36.5833	-0.00049						36.5833	-0.036435				7.38333	-0.000307					3.69154	0.000518322			3.692	-0.000492996
36.6667	-0.002225						36.6667	-0.027241				7.4	-0.000549					3.69996	0.000506636			3.70042	-0.000471909
36.75	-0.002955						36.75	-0.019192				7.41667	-0.001063					3.70838	0.000506274			3.70884	-0.000448914
36.8333	-0.003909						36.8333	-0.012496				7.43333	-0.001487					3.71679	0.000528432			3.71725	-0.000430984
36.9167	-0.003968						36.9167	-0.009865				7.45	-0.001481					3.72521	0.000565977			3.72567	-0.00042254
37	-0.003231						37	-0.004198				7.46667	-0.001175					3.73363	0.000604966			3.73409	-0.000428176
37.0833	-0.004078						37.0833	-0.001006				7.48333	-0.001189					3.74205	0.000638098			3.74251	-0.000444925
37.1667	-0.002901						37.1667	0.002003				7.5	-0.001384					3.75046	0.000661561			3.75092	-0.000451709
37.25	-0.001919						37.25	0.000868				7.51667	-0.001381					3.75888	0.000672786			3.75934	-0.000424095
37.3333	6.9e-05						37.3333	0.000979				7.53333	-0.001398					3.7673	0.000675388			3.76776	-0.000364452
37.4167	0.002221						37.4167	0.004077				7.55	-0.001305					3.77572	0.000678367			3.77617	-0.000294999
37.5	0.00146						37.5	0.002831				7.56667	-0.001092					3.78413	0.000686519			3.78459	-0.000230178
37.5833	-0.000136						37.5833	0.005791				7.58333	-0.001339					3.79255	0.000697045			3.79301	-0.000174305
37.6667	-0.001447						37.6667	0.006647				7.6	-0.001476					3.80097	0.000706757			3.80143	-0.000130031
37.75	-0.001124						37.75	0.00503				7.61667	-0.001253					3.80938	0.000713482			3.80984	-0.000100597
37.8333	-0.000907						37.8333	-0.00306				7.63333	-0.000829					3.8178	0.000711395			3.81826	-8.77107e-05
37.9167	4e-06						37.9167	-0.041165				7.65	-0.000446					3.82622	0.000692286			3.82668	-8.91202e-05
38	-0.003961						38	-0.134254				7.66667	-0.000113					3.83464	0.000658562			3.8351	-0.000101263
38.0833	-0.02222						38.0833	-0.132888				7.68333	0.00032					3.84305	0.000622426			3.84351	-0.000125345
38.1667	-0.008994						38.1667	-0.134797				7.7	0.000875					3.85147	0.000588109			3.85193	-0.000159781
38.25	-0.006592						38.25	-0.097812				7.71667	0.001083					3.85989	0.00055083			3.86035	-0.000196691
38.3333	-0.002233						38.3333	-0.075362				7.73333	0.00103					3.86831	0.000504696			3.86876	-0.000231273
38.4167	-0.000477						38.4167	-0.060598				7.75	0.001088					3.87672	0.000452341			3.87718	-0.000258978
38.5	0.001837						38.5	-0.045				7.76667	0.001026					3.88514	0.000407407			3.8856	-0.000268934
38.5833	-0.000601						38.5833	-0.036638				7.78333	0.000633					3.89356	0.000379535			3.89402	-0.00025714
38.6667	0.000379						38.6667	-0.024423				7.8	4.5e-05					3.90197	0.000363239			3.90243	-0.000234899
38.75	0.001189						38.75	-0.018266				7.81667	-0.000108					3.91039	0.000351255			3.91085	-0.000211986
38.8333	0.001309						38.8333	-0.010685				7.83333	0.000258					3.91881	0.000349373			3.91927	-0.00019067
38.9167	-0.001161						38.9167	-0.006792				7.85	0.000854					3.92723	0.000368921			3.92769	-0.00017035
39	-0.003041						39	-0.008327				7.86667	0.00147					3.93564	0.000408746			3.9361	-0.000151334
39.0833	0.001149						39.0833	-0.00422				7.88333	0.001896					3.94406	0.000456711			3.94452	-0.000138439
39.1667	0.00427						39.1667	-0.001782				7.9	0.001939					3.95248	0.000501936			3.95294	-0.000142419
39.25	0.001743						39.25	-0.003472				7.91667	0.002197					3.9609	0.000538112			3.96135	-0.000168395
39.3333	0.000837						39.3333	-0.006112				7.93333	0.002385					3.96931	0.00056087			3.96977	-0.000201936
39.4167	0.000411						39.4167	-0.00344				7.95	0.002333					3.97773	0.000574559			3.97819	-0.000228257
39.5	0.000432						39.5	0.000541				7.96667	0.002091					3.98615	0.000595536			3.98661	-0.000248863
39.5833	-0.00025						39.5833	-0.002807				7.98333	0.001779					3.99456	0.000632885			3.99502	-0.000270265
39.6667	-0.003138						39.6667	-0.007505				8	0.001544					4.00298	0.000680272			4.00344	-0.000298092
39.75	-0.000343						39.75	-0.010814				8.01667	0.001284					4.0114	0.000727372			4.01186	-0.000333951
39.8333	5.3e-05						39.8333	-0.014083				8.03333	0.001155					4.01982	0.000767668			4.02028	-0.000367134
39.9167	-0.001831						39.9167	-0.075552				8.05	0.001166					4.02823	0.000796694			4.02869	-0.000382096
							40	-0.159491				8.06667	0.001046					4.03665	0.000807321			4.03711	-0.000378164
							40.0833	-0.159911				8.08333	0.000827					4.04507	0.000786193			4.04553	-0.000368502
							40.1667	-0.143781				8.1	0.000614					4.05349	0.000728527			4.05394	-0.000364501
							40.25	-0.109722				8.11667	0.000616					4.0619	0.00065055			4.06236	-0.000367604
							40.3333	-0.098822				8.13333	0.000948					4.07032	0.000572178			4.07078	-0.000374728
							40.4167	-0.087433				8.15	0.001059					4.07874	0.000508914			4.0792	-0.000387743
							40.5	-0.072125				8.16667	0.000971					4.08715	0.000467232			4.08761	-0.000414968
							40.5833	-0.057396				8.18333	0.000753					4.09557	0.00043835			4.09603	-0.000460596
							40.6667	-0.047728				8.2	0.00066					4.10399	0.000412191			4.10445	-0.000519976
							40.75	-0.036779				8.21667	0.00059					4.11241	0.000384026			4.11287	-0.000591699
							40.8333	-0.032841				8.23333	0.00017					4.12082	0.000351949			4.12128	-0.000678192
							40.9167	-0.030943				8.25	-0.000359					4.12924	0.000318024			4.1297	-0.000772339
							41	-0.025445				8.26667	-0.000609					4.13766	0.000286286			4.13812	-0.000858978
							41.0833	-0.021408				8.28333	-0.000838					4.14608	0.000258052			4.14653	-0.000932323
							41.1667	-0.01057				8.3	-0.001016					4.15449	0.000232216			4.15495	-0.000995643
							41.25	-0.010543				8.31667	-0.00097					4.16291	0.000205795			4.16337	-0.00105
							41.3333	-0.009985				8.33333	-0.000845					4.17133	0.000173537			4.17179	-0.0011
							41.4167	-0.005988				8.35	-0.00101					4.17974	0.000133236			4.1802	-0.00114
							41.5	-0.005241				8.36667	-0.001394					4.18816	8.98241e-05			4.18862	-0.00116
							41.5833	-0.002553				8.38333	-0.001179					4.19658	5.00854e-05			4.19704	-0.00113
							41.6667	0.000654				8.4	-0.000753					4.205	2.27299e-05			4.20546	-0.00106
							41.75	-0.000129				8.41667	-0.000665					4.21341	1.48727e-05			4.21387	-0.000982072
												8.43333	-0.001127					4.22183	2.23339e-05			4.22229	-0.000914608
												8.45	-0.00222					4.23025	3.41201e-05			4.23071	-0.000868661
												8.46667	-0.001182					4.23867	3.9204e-05			4.23912	-0.000853103
												8.48333	-0.000585					4.24708	2.48054e-05			4.24754	-0.000865563
												8.5	-0.000187					4.2555	-1.19411e-05			4.25596	-0.000895074
												8.51667	-0.006078					4.26392	-5.52399e-05			4.26438	-0.000930733
												8.53333	-0.010339					4.27233	-9.33278e-05			4.27279	-0.000963048
												8.55	-0.026661					4.28075	-0.000125432			4.28121	-0.0009862
												8.56667	-0.104462					4.28917	-0.000153343			4.28963	-0.001
												8.58333	-0.271574					4.29759	-0.000174888			4.29805	-0.00102
												8.6	-0.499755					4.306	-0.000182472			4.30646	-0.00105
												8.61667	-0.736326					4.31442	-0.000174774			4.31488	-0.00108
												8.63333	-0.930347					4.32284	-0.000163547			4.3233	-0.00112
												8.65	-1.01345					4.33126	-0.000159302			4.33172	-0.00114
												8.66667	-0.981289					4.33967	-0.000162124			4.34013	-0.00115
												8.68333	-0.87909					4.34809	-0.000157806			4.34855	-0.00113
												8.7	-0.757322					4.35651	-0.000134371			4.35697	-0.00109
												8.71667	-0.647913					4.36492	-0.000100856			4.36538	-0.00103
												8.73333	-0.567895					4.37334	-7.26078e-05			4.3738	-0.000967496
												8.75	-0.501296					4.38176	-6.20912e-05			4.38222	-0.00090524
												8.76667	-0.427198					4.39018	-7.16532e-05			4.39064	-0.000845937
												8.78333	-0.357639					4.39859	-8.58426e-05			4.39905	-0.000789992
												8.8	-0.296611					4.40701	-9.00617e-05			4.40747	-0.000738306
												8.81667	-0.245407					4.41543	-8.02421e-05			4.41589	-0.000689665
												8.83333	-0.209823					4.42385	-5.73203e-05			4.42431	-0.000642677
												8.85	-0.182219					4.43226	-2.81243e-05			4.43272	-0.000598776
												8.86667	-0.157694					4.44068	-1.5416e-06			4.44114	-0.000559316
												8.88333	-0.13981					4.4491	1.53569e-05			4.44956	-0.000523803
												8.9	-0.124146					4.45751	1.42948e-05			4.45797	-0.000492725
												8.91667	-0.110406					4.46593	-6.59575e-06			4.46639	-0.000470729
												8.93333	-0.101756					4.47435	-3.72451e-05			4.47481	-0.000461032
												8.95	-0.094757					4.48277	-6.85152e-05			4.48323	-0.000454994
												8.96667	-0.088007					4.49118	-9.06093e-05			4.49164	-0.000440437
												8.98333	-0.082747					4.4996	-9.02572e-05			4.50006	-0.000418845
												9	-0.076905					4.50802	-6.62567e-05			4.50848	-0.000400838
												9.01667	-0.069883					4.51644	-3.21593e-05			4.5169	-0.000394284
												9.03333	-0.063622					4.52485	-1.45893e-06			4.52531	-0.000399284
												9.05	-0.05711					4.53327	1.86495e-05			4.53373	-0.000407923
												9.06667	-0.051039					4.54169	2.69913e-05			4.54215	-0.00041099
												9.08333	-0.045127					4.5501	3.01407e-05			4.55056	-0.00040784
												9.1	-0.03979					4.55852	3.81917e-05			4.55898	-0.000402668
												9.11667	-0.035999					4.56694	5.27805e-05			4.5674	-0.000397538
												9.13333	-0.032717					4.57536	6.81212e-05			4.57582	-0.000392625
												9.15	-0.030166					4.58377	7.84175e-05			4.58423	-0.000388591
												9.16667	-0.027645					4.59219	7.92161e-05			4.59265	-0.000388331
												9.18333	-0.025013					4.60061	6.57862e-05			4.60107	-0.000398865
												9.2	-0.022247					4.60903	3.93268e-05			4.60949	-0.000425164
												9.21667	-0.019876					4.61744	1.04647e-05			4.6179	-0.00046214
												9.23333	-0.017445					4.62586	-1.25951e-05			4.62632	-0.000498156
												9.25	-0.014574					4.63428	-2.79522e-05			4.63474	-0.000523818
												9.26667	-0.011803					4.64269	-3.03758e-05			4.64315	-0.000541159
												9.28333	-0.009132					4.65111	-1.55218e-05			4.65157	-0.000556259
												9.3	-0.007243					4.65953	9.11064e-06			4.65999	-0.000575075
												9.31667	-0.006115					4.66795	3.19893e-05			4.66841	-0.000604431
												9.33333	-0.005038					4.67636	4.74143e-05			4.67682	-0.000646466
												9.35	-0.004091					4.68478	5.76663e-05			4.68524	-0.000693252
												9.36667	-0.003103					4.6932	6.69419e-05			4.69366	-0.000734805
												9.38333	-0.002436					4.70162	7.49243e-05			4.70208	-0.000771903
												9.4	-0.002298					4.71003	8.16818e-05			4.71049	-0.000810593
												9.41667	-0.002964					4.71845	9.56249e-05			4.71891	-0.000852129
												9.43333	-0.0035					4.72687	0.000127853			4.72733	-0.00088863
												9.45	-0.003706					4.73528	0.000175318			4.73574	-0.000906756
												9.46667	-0.003762					4.7437	0.000222878			4.74416	-0.000901165
												9.48333	-0.003799					4.75212	0.000259811			4.75258	-0.000872529
												9.5	-0.003792					4.76054	0.000282299			4.761	-0.000820294
												9.51667	-0.0038					4.76895	0.000289571			4.76941	-0.000753512
												9.53333	-0.003728					4.77737	0.000284343			4.77783	-0.000686648
												9.55	-0.003406					4.78579	0.000272662			4.78625	-0.000628226
												9.56667	-0.003064					4.79421	0.000259437			4.79467	-0.000583074
												9.58333	-0.003282					4.80262	0.000243288			4.80308	-0.000556242
												9.6	-0.00368					4.81104	0.000219248			4.8115	-0.00054646
												9.61667	-0.003896					4.81946	0.000185789			4.81992	-0.000545085
												9.63333	-0.004003					4.82787	0.00014724			4.82833	-0.000553418
												9.65	-0.003689					4.83629	0.000105308			4.83675	-0.000579276
												9.66667	-0.003535					4.84471	5.85353e-05			4.84517	-0.000618545
												9.68333	-0.003321					4.85313	1.19368e-05			4.85359	-0.000655263
												9.7	-0.00308					4.86154	-2.20521e-05			4.862	-0.000677101
												9.71667	-0.002624					4.86996	-3.66837e-05			4.87042	-0.000686277
												9.73333	-0.002337					4.87838	-3.48991e-05			4.87884	-0.000693398
												9.75	-0.00221					4.8868	-1.98921e-05			4.88726	-0.000703179
												9.76667	-0.002124					4.89521	9.90514e-06			4.89567	-0.000707396
												9.78333	-0.002167					4.90363	5.53663e-05			4.90409	-0.000688901
												9.8	-0.002334					4.91205	0.00011138			4.91251	-0.000640415
												9.81667	-0.002505					4.92046	0.000172209			4.92092	-0.000574833
												9.83333	-0.002466					4.92888	0.000233889			4.92934	-0.000511347
												9.85	-0.002317					4.9373	0.000292554			4.93776	-0.000459569
												9.86667	-0.002068					4.94572	0.000343955			4.94618	-0.000420983
												9.88333	-0.00191					4.95413	0.000384763			4.95459	-0.000394028
												9.9	-0.001963					4.96255	0.000415973			4.96301	-0.000376854
												9.91667	-0.00184					4.97097	0.000445827			4.97143	-0.000368837
												9.93333	-0.001548					4.97939	0.000479854			4.97985	-0.00037016
												9.95	-0.001135					4.9878	0.000513654			4.98826	-0.000375089
												9.96667	-0.000812					4.99622	0.000541948			4.99668	-0.000368876
												9.98333	-0.00058					5.00464	0.000560762			5.0051	-0.000347872
												10	-0.000498					5.01305	0.000563518			5.01351	-0.000327432
												10.0167	-0.000357					5.02147	0.000548911			5.02193	-0.000319097
												10.0333	-0.000116					5.02989	0.000524429			5.03035	-0.000320822
												10.05	-0.000145					5.03831	0.000491495			5.03877	-0.000321585
												10.0667	-0.000315					5.04672	0.00045207			5.04718	-0.000312821
												10.0833	-0.000284					5.05514	0.000417084			5.0556	-0.000293314
												10.1	-7.2e-05					5.06356	0.000390459			5.06402	-0.000264669
												10.1167	0.000482					5.07198	0.000368833			5.07244	-0.000230583
												10.1333	0.000876					5.08039	0.000349558			5.08085	-0.000197226
												10.15	0.00116					5.08881	0.000332608			5.08927	-0.000171777
												10.1667	0.001274					5.09723	0.000322264			5.09769	-0.00016644
												10.1833	0.001488					5.10565	0.000325171			5.1061	-0.000189391
												10.2	0.001565					5.11406	0.00034106			5.11452	-0.000228234
												10.2167	0.001647					5.12248	0.0003622			5.12294	-0.000265721
												10.2333	0.001739					5.1309	0.000382727			5.13136	-0.000297893
												10.25	0.001441					5.13931	0.000400561			5.13977	-0.000329335
												10.2667	0.000933					5.14773	0.000415212			5.14819	-0.000369491
												10.2833	0.000545					5.15615	0.000427237			5.15661	-0.000423903
												10.3	0.000271					5.16457	0.00043733			5.16503	-0.000484507
												10.3167	-2.6e-05					5.17298	0.000444981			5.17344	-0.000541544
												10.3333	8e-06					5.1814	0.000449917			5.18186	-0.000592899
												10.35	0.000101					5.18982	0.000455625			5.19028	-0.000640725
												10.3667	0.000234					5.19824	0.000467498			5.19869	-0.000683936
												10.3833	0.000607					5.20665	0.000485247			5.20711	-0.000714441
												10.4	0.001145					5.21507	0.000502386			5.21553	-0.000728124
												10.4167	0.001492					5.22349	0.000511673			5.22395	-0.000730347
												10.4333	0.001758					5.2319	0.000505259			5.23236	-0.000723212
												10.45	0.001665					5.24032	0.000482595			5.24078	-0.000702545
												10.4667	0.001451					5.24874	0.000456047			5.2492	-0.00066896
												10.4833	0.001097					5.25716	0.00043398			5.25762	-0.00063362
												10.5	0.000679					5.26557	0.000415876			5.26603	-0.000609327
												10.5167	0.00016					5.27399	0.000399143			5.27445	-0.000602973
												10.5333	-7.9e-05					5.28241	0.000381187			5.28287	-0.000614585
												10.55	-0.000289					5.29083	0.000358863			5.29128	-0.000637813
												10.5667	-0.000188					5.29924	0.00032944			5.2997	-0.000664839
												10.5833	0.000313					5.30766	0.00029216			5.30812	-0.000686867
												10.6	0.000679					5.31608	0.00024732			5.31654	-0.00069576
												10.6167	0.000654					5.32449	0.000201106			5.32495	-0.000690768
												10.6333	0.000568					5.33291	0.000164206			5.33337	-0.000679699
												10.65	0.000543					5.34133	0.000139218			5.34179	-0.000673517
												10.6667	0.000408					5.34975	0.000121715			5.35021	-0.000680308
												10.6833	0.000273					5.35816	0.000106099			5.35862	-0.000699862
												10.7	0.000222					5.36658	8.71954e-05			5.36704	-0.000721857
												10.7167	0.000101					5.375	5.94673e-05			5.37546	-0.000729919
												10.7333	2.9e-05					5.38342	1.78634e-05			5.38388	-0.00071425
												10.75	5.7e-05					5.39183	-3.8236e-05			5.39229	-0.000678791
												10.7667	-0.000185					5.40025	-0.000100245			5.40071	-0.000634479
												10.7833	-0.000527					5.40867	-0.000157184			5.40913	-0.000588389
												10.8	-0.000664					5.41708	-0.000206422			5.41754	-0.000537466
												10.8167	-0.000383					5.4255	-0.000249868			5.42596	-0.000476623
												10.8333	0.000218					5.43392	-0.000286804			5.43438	-0.000412933
												10.85	0.000989					5.44234	-0.000314294			5.4428	-0.00036087
												10.8667	0.001199					5.45075	-0.00033249			5.45121	-0.000331815
												10.8833	0.00114					5.45917	-0.000344287			5.45963	-0.000334596
												10.9	0.001315					5.46759	-0.000348786			5.46805	-0.000367275
												10.9167	0.001627					5.47601	-0.000344502			5.47647	-0.000413389
												10.9333	0.001769					5.48442	-0.000335105			5.48488	-0.00046004
												10.95	0.002271					5.49284	-0.000323674			5.4933	-0.000507006
												10.9667	0.002684					5.50126	-0.000309287			5.50172	-0.000558897
												10.9833	0.003976					5.50967	-0.000291713			5.51013	-0.000617388
												11	0.008561					5.51809	-0.000275478			5.51855	-0.000681738
												11.0167	0.009682					5.52651	-0.000265625			5.52697	-0.000750956
												11.0333	0.003894					5.53493	-0.000257682			5.53539	-0.000822309
												11.05	-0.019895					5.54334	-0.000240865			5.5438	-0.000887816
												11.0667	-0.087724					5.55176	-0.000216041			5.55222	-0.000939958
												11.0833	-0.240933					5.56018	-0.000189875			5.56064	-0.000973809
												11.1	-0.447819					5.5686	-0.000163863			5.56906	-0.000989736
												11.1167	-0.662992					5.57701	-0.00013258			5.57747	-0.000996308
												11.1333	-0.836565					5.58543	-8.92998e-05			5.58589	-0.001
												11.15	-0.915218					5.59385	-3.62573e-05			5.59431	-0.00101
												11.1667	-0.898151					5.60226	1.70022e-05			5.60272	-0.00103
												11.1833	-0.815454					5.61068	6.11455e-05			5.61114	-0.00105
												11.2	-0.715526					5.6191	8.39583e-05			5.61956	-0.00106
												11.2167	-0.626026					5.62752	7.26163e-05			5.62798	-0.00106
												11.2333	-0.558486					5.63593	3.0586e-05			5.63639	-0.00105
												11.25	-0.504396					5.64435	-1.86351e-05			5.64481	-0.00104
												11.2667	-0.438306					5.65277	-5.33098e-05			5.65323	-0.00105
												11.2833	-0.363567					5.66119	-7.35419e-05			5.66165	-0.00106
												11.3	-0.303027					5.6696	-9.03924e-05			5.67006	-0.00108
												11.3167	-0.263577					5.67802	-0.000112724			5.67848	-0.0011
												11.3333	-0.231858					5.68644	-0.000143581			5.6869	-0.00112
												11.35	-0.206388					5.69485	-0.000178033			5.69531	-0.00115
												11.3667	-0.185099					5.70327	-0.000209586			5.70373	-0.00117
												11.3833	-0.164119					5.71169	-0.00023338			5.71215	-0.00119
												11.4	-0.143369					5.72011	-0.000240649			5.72057	-0.0012
												11.4167	-0.12584					5.72852	-0.000226128			5.72898	-0.00122
												11.4333	-0.11285					5.73694	-0.000197508			5.7374	-0.00125
												11.45	-0.10332					5.74536	-0.000161908			5.74582	-0.00129
												11.4667	-0.092821					5.75378	-0.000118974			5.75424	-0.00134
												11.4833	-0.085351					5.76219	-6.76832e-05			5.76265	-0.0014
												11.5	-0.07865					5.77061	-8.79752e-06			5.77107	-0.00145
												11.5167	-0.07315					5.77903	5.77076e-05			5.77949	-0.0015
												11.5333	-0.06788					5.78744	0.000126072			5.7879	-0.00153
												11.55	-0.06292					5.79586	0.000186207			5.79632	-0.00156
												11.5667	-0.0574					5.80428	0.000230703			5.80474	-0.00159
												11.5833	-0.05238					5.8127	0.000254378			5.81316	-0.00161
												11.6	-0.048111					5.82111	0.000251744			5.82157	-0.00163
												11.6167	-0.044412					5.82953	0.000229236			5.82999	-0.00166
												11.6333	-0.040463					5.83795	0.000213385			5.83841	-0.00169
												11.65	-0.036994					5.84637	0.00022052			5.84683	-0.00172
												11.6667	-0.033796					5.85478	0.000238854			5.85524	-0.00175
												11.6833	-0.031267					5.8632	0.000253366			5.86366	-0.00178
												11.7	-0.028477					5.87162	0.000254711			5.87208	-0.00181
												11.7167	-0.024779					5.88003	0.000243774			5.88049	-0.00185
												11.7333	-0.021021					5.88845	0.000232001			5.88891	-0.00189
												11.75	-0.017483					5.89687	0.000223552			5.89733	-0.00193
												11.7667	-0.014265					5.90529	0.000216208			5.90575	-0.00195
												11.7833	-0.011577					5.9137	0.000207978			5.91416	-0.00195
												11.8	-0.009624					5.92212	0.000197048			5.92258	-0.00191
												11.8167	-0.009049					5.93054	0.000182544			5.931	-0.00187
												11.8333	-0.008934					5.93896	0.000164074			5.93942	-0.00182
												11.85	-0.008598					5.94737	0.000142569			5.94783	-0.00178
												11.8667	-0.008273					5.95579	0.00012139			5.95625	-0.00175
												11.8833	-0.008128					5.96421	9.95121e-05			5.96467	-0.00172
												11.9	-0.007701					5.97262	7.22638e-05			5.97308	-0.00166
												11.9167	-0.00676					5.98104	3.96291e-05			5.9815	-0.00158
												11.9333	-0.005989					5.98946	1.13937e-05			5.98992	-0.0015
												11.95	-0.005498					5.99788	-2.57989e-06			5.99834	-0.00141
												11.9667	-0.005096					6.00629	-6.61896e-06			6.00675	-0.00133
												11.9833	-0.004575					6.01471	-9.28573e-06			6.01517	-0.00126
												12	-0.00406					6.02313	-1.45243e-05			6.02359	-0.00119
												12.0167	-0.00353					6.03155	-2.25273e-05			6.03201	-0.00112
												12.0333	-0.003249					6.03996	-2.81223e-05			6.04042	-0.00106
												12.05	-0.003269					6.04838	-2.08654e-05			6.04884	-0.00102
												12.0667	-0.003498					6.0568	6.55743e-06			6.05726	-0.00099987
												12.0833	-0.003478					6.06521	5.07738e-05			6.06567	-0.00102
												12.1	-0.003413					6.07363	0.000101996			6.07409	-0.00106
												12.1167	-0.00309					6.08205	0.000151865			6.08251	-0.00112
												12.1333	-0.002527					6.09047	0.000194291			6.09093	-0.00117
												12.15	-0.001954					6.09888	0.000223186			6.09934	-0.0012
												12.1667	-0.001482					6.1073	0.000234506			6.10776	-0.00122
												12.1833	-0.001239					6.11572	0.000234034			6.11618	-0.00124
												12.2	-0.001179					6.12414	0.000235103			6.1246	-0.00126
												12.2167	-0.000856					6.13255	0.000241595			6.13301	-0.0013
												12.2333	-0.000544					6.14097	0.000250264			6.14143	-0.00135
												12.25	-0.000191					6.14939	0.000259315			6.14985	-0.00142
												12.2667	0.000381					6.1578	0.000270822			6.15826	-0.00148
												12.2833	0.000904					6.16622	0.000288076			6.16668	-0.00153
												12.3	0.001336					6.17464	0.00030968			6.1751	-0.00158
												12.3167	0.001298					6.18306	0.000330116			6.18352	-0.00161
												12.3333	0.000969					6.19147	0.000345221			6.19193	-0.00163
												12.35	0.000691					6.19989	0.000353806			6.20035	-0.00164
												12.3667	0.000462					6.20831	0.000357085			6.20877	-0.00164
												12.3833	0.000454					6.21673	0.000356865			6.21719	-0.00163
												12.4	0.000567					6.22514	0.00035172			6.2256	-0.00161
												12.4167	0.000746					6.23356	0.000337123			6.23402	-0.00159
												12.4333	0.000825					6.24198	0.000312449			6.24244	-0.00157
												12.45	0.001014					6.25039	0.000284403			6.25085	-0.00157
												12.4667	0.000973					6.25881	0.000256932			6.25927	-0.00157
												12.4833	0.001092					6.26723	0.000228464			6.26769	-0.00158
												12.5	0.001605					6.27565	0.000196617			6.27611	-0.00159
												12.5167	0.002079					6.28406	0.000161296			6.28452	-0.00162
												12.5333	0.002262					6.29248	0.000127227			6.29294	-0.00165
												12.55	0.002046					6.3009	0.000103205			6.30136	-0.00168
												12.5667	0.001909					6.30932	9.2705e-05			6.30978	-0.00169
												12.5833	0.002223					6.31773	8.98909e-05			6.31819	-0.00169
												12.6	0.002402					6.32615	8.76293e-05			6.32661	-0.00168
												12.6167	0.002315					6.33457	8.29545e-05			6.33503	-0.00167
												12.6333	0.001869					6.34298	7.8816e-05			6.34344	-0.00166
												12.65	0.001372					6.3514	8.03493e-05			6.35186	-0.00166
												12.6667	0.001166					6.35982	8.59363e-05			6.36028	-0.00167
												12.6833	0.001519					6.36824	8.81839e-05			6.3687	-0.00167
												12.7	0.002308					6.37665	7.78185e-05			6.37711	-0.00167
												12.7167	0.003064					6.38507	5.58396e-05			6.38553	-0.00167
												12.7333	0.003629					6.39349	3.84247e-05			6.39395	-0.00168
												12.75	0.003815					6.40191	3.51736e-05			6.40237	-0.00169
												12.7667	0.00403					6.41032	4.41995e-05			6.41078	-0.00169
												12.7833	0.003996					6.41874	6.13668e-05			6.4192	-0.0017
												12.8	0.003697					6.42716	8.49926e-05			6.42762	-0.00172
												12.8167	0.003043					6.43557	0.000114014			6.43603	-0.00174
												12.8333	0.002789					6.44399	0.000145055			6.44445	-0.00175
												12.85	0.002605					6.45241	0.00017338			6.45287	-0.00175
												12.8667	0.001982					6.46083	0.000196198			6.46129	-0.00174
												12.8833	0.001788					6.46924	0.000212427			6.4697	-0.00173
												12.9	0.001528					6.47766	0.000220647			6.47812	-0.00171
												12.9167	0.001089					6.48608	0.000217377			6.48654	-0.0017
												12.9333	0.00042					6.4945	0.000203543			6.49496	-0.00169
												12.95	-0.000109					6.50291	0.000192648			6.50337	-0.00166
												12.9667	-0.000258					6.51133	0.000203996			6.51179	-0.00161
												12.9833	-7.7e-05					6.51975	0.000244084			6.52021	-0.00157
												13	9.6e-05					6.52816	0.000300167			6.52863	-0.00154
												13.0167	-0.000226					6.53658	0.000362868			6.53704	-0.00153
												13.0333	-0.000938					6.545	0.000430154			6.54546	-0.00151
												13.05	-0.0017					6.55342	0.000496822			6.55388	-0.00147
												13.0667	-0.002362					6.56183	0.000555278			6.56229	-0.00143
												13.0833	-0.002624					6.57025	0.00059806			6.57071	-0.00139
												13.1	-0.002656					6.57867	0.000618514			6.57913	-0.00136
												13.1167	-0.002678					6.58709	0.000610502			6.58755	-0.00133
												13.1333	-0.00271					6.5955	0.000577824			6.59596	-0.0013
												13.15	-0.002573					6.60392	0.000538206			6.60438	-0.00128
												13.1667	-0.002065					6.61234	0.000505405			6.6128	-0.00126
												13.1833	-0.001488					6.62075	0.000479761			6.62122	-0.00125
												13.2	-0.001211					6.62917	0.000457832			6.62963	-0.00122
												13.2167	-0.001448					6.63759	0.000437531			6.63805	-0.00118
												13.2333	-0.001675					6.64601	0.000417092			6.64647	-0.00113
												13.25	-0.001933					6.65442	0.000393793			6.65488	-0.0011
												13.2667	-0.00178					6.66284	0.000366996			6.6633	-0.00107
												13.2833	-0.001437					6.67126	0.000341283			6.67172	-0.00107
												13.3	-0.001136					6.67968	0.000319829			6.68014	-0.00109
												13.3167	-0.000759					6.68809	0.000301845			6.68855	-0.00111
												13.3333	-0.000473					6.69651	0.000284622			6.69697	-0.00113
												13.35	-0.000187					6.70493	0.000266355			6.70539	-0.00116
												13.3667	5.9e-05					6.71334	0.00024973			6.71381	-0.00118
												13.3833	0.000385					6.72176	0.000238326			6.72222	-0.00121
												13.4	0.00012					6.73018	0.000230659			6.73064	-0.00123
												13.4167	0.00013					6.7386	0.00022354			6.73906	-0.00125
												13.4333	-0.001151					6.74701	0.000217174			6.74747	-0.00128
												13.45	-0.001702					6.75543	0.000218553			6.75589	-0.0013
												13.4667	-0.000542					6.76385	0.000233939			6.76431	-0.00132
												13.4833	-0.000553					6.77227	0.000257515			6.77273	-0.00132
												13.5	-0.000735					6.78068	0.000279735			6.78114	-0.00133
												13.5167	-0.003452					6.7891	0.00029323			6.78956	-0.00133
												13.5333	-0.001639					6.79752	0.000291494			6.79798	-0.00134
												13.55	-0.008247					6.80594	0.000271891			6.8064	-0.00134
												13.5667	-0.051914					6.81435	0.000241305			6.81481	-0.00134
												13.5833	-0.160971					6.82277	0.000210835			6.82323	-0.00134
												13.6	-0.318949					6.83119	0.000181858			6.83165	-0.00133
												13.6167	-0.496053					6.8396	0.000152923			6.84006	-0.00133
												13.6333	-0.659876					6.84802	0.000131566			6.84848	-0.00134
												13.65	-0.7626					6.85644	0.000130057			6.8569	-0.00134
												13.6667	-0.779333					6.86486	0.000146508			6.86532	-0.00135
												13.6833	-0.743796					6.87327	0.000166164			6.87373	-0.00135
												13.7	-0.676761					6.88169	0.000179703			6.88215	-0.00136
												13.7167	-0.60635					6.89011	0.000187636			6.89057	-0.00138
												13.7333	-0.549929					6.89853	0.000196064			6.89899	-0.0014
												13.75	-0.507678					6.90694	0.000208138			6.9074	-0.0014
												13.7667	-0.461217					6.91536	0.000220789			6.91582	-0.00139
												13.7833	-0.394456					6.92378	0.000227925			6.92424	-0.00137
												13.8	-0.329766					6.93219	0.000216634			6.93265	-0.00135
												13.8167	-0.27815					6.94061	0.000174842			6.94107	-0.00132
												13.8333	-0.242124					6.94903	0.000113069			6.94949	-0.0013
												13.85	-0.216328					6.95745	5.80308e-05			6.95791	-0.00129
												13.8667	-0.197362					6.96586	3.20511e-05			6.96632	-0.00128
												13.8833	-0.180646					6.97428	4.62258e-05			6.97474	-0.00128
												13.9	-0.165491					6.9827	9.00574e-05			6.98316	-0.00131
												13.9167	-0.14936					6.99112	0.00013781			6.99158	-0.00134
												13.9333	-0.131258					6.99953	0.000171637			6.99999	-0.00137
												13.95	-0.115777					7.00795	0.000182821			7.00841	-0.0014
												13.9667	-0.106496					7.01637	0.000168356			7.01683	-0.00142
												13.9833	-0.097174					7.02478	0.000148464			7.02524	-0.00145
												14	-0.088664					7.0332	0.000158984			7.03366	-0.00148
												14.0167	-0.080906					7.04162	0.000208331			7.04208	-0.00151
												14.0333	-0.073229					7.05004	0.000279297			7.0505	-0.00155
												14.05	-0.066702					7.05845	0.000356194			7.05891	-0.00158
												14.0667	-0.061215					7.06687	0.000430183			7.06733	-0.00159
												14.0833	-0.054337					7.07529	0.000497606			7.07575	-0.00159
												14.1	-0.048331					7.08371	0.000556938			7.08417	-0.00157
												14.1167	-0.044967					7.09212	0.000606713			7.09258	-0.00155
												14.1333	-0.042343					7.10054	0.000645059			7.101	-0.00152
												14.15	-0.03932					7.10896	0.000668305			7.10942	-0.00149
												14.1667	-0.035276					7.11737	0.000674868			7.11783	-0.00146
												14.1833	-0.031662					7.12579	0.000667639			7.12625	-0.00144
												14.2	-0.028479					7.13421	0.000648591			7.13467	-0.00142
												14.2167	-0.025728					7.14263	0.000620511			7.14309	-0.00143
												14.2333	-0.023258					7.15104	0.000589908			7.1515	-0.00146
												14.25	-0.020767					7.15946	0.000565082			7.15992	-0.00151
												14.2667	-0.018996					7.16788	0.000553962			7.16834	-0.00154
												14.2833	-0.017636					7.1763	0.000557364			7.17676	-0.00157
												14.3	-0.016525					7.18471	0.00056557			7.18517	-0.00158
												14.3167	-0.015367					7.19313	0.000571523			7.19359	-0.00158
												14.3333	-0.014069					7.20155	0.000575859			7.20201	-0.00158
												14.35	-0.012911					7.20996	0.000581134			7.21042	-0.00158
												14.3667	-0.011823					7.21838	0.000586945			7.21884	-0.00159
												14.3833	-0.010875					7.2268	0.000592256			7.22726	-0.00161
												14.4	-0.009607					7.23522	0.000597153			7.23568	-0.00163
												14.4167	-0.008541					7.24363	0.00060175			7.24409	-0.00165
												14.4333	-0.007734					7.25205	0.000605032			7.25251	-0.00166
												14.45	-0.007098					7.26047	0.000605119			7.26093	-0.00168
												14.4667	-0.006572					7.26889	0.000601385			7.26935	-0.00171
												14.4833	-0.006186					7.2773	0.000594878			7.27776	-0.00175
												14.5	-0.00577					7.28572	0.000585252			7.28618	-0.00179
												14.5167	-0.005315					7.29414	0.000571808			7.2946	-0.00182
												14.5333	-0.004601					7.30255	0.000554176			7.30301	-0.00184
												14.55	-0.003796					7.31097	0.000532481			7.31143	-0.00185
												14.5667	-0.003311					7.31939	0.000512762			7.31985	-0.00185
												14.5833	-0.003227					7.32781	0.000505281			7.32827	-0.00185
												14.6	-0.002882					7.33622	0.000511435			7.33668	-0.00185
												14.6167	-0.002469					7.34464	0.00052557			7.3451	-0.00185
												14.6333	-0.001965					7.35306	0.0005439			7.35352	-0.00183
												14.65	-0.001441					7.36148	0.000564379			7.36194	-0.00181
												14.6667	-0.001348					7.36989	0.0005845			7.37035	-0.0018
												14.6833	-0.001424					7.37831	0.000601993			7.37877	-0.00179
												14.7	-0.0016					7.38673	0.000615171			7.38719	-0.00178
												14.7167	-0.001607					7.39514	0.00062253			7.3956	-0.00176
												14.7333	-0.001604					7.40356	0.000624159			7.40402	-0.00174
												14.75	-0.001601					7.41198	0.000622389			7.41244	-0.00171
												14.7667	-0.001507					7.4204	0.000619494			7.42086	-0.00169
												14.7833	-0.001214					7.42881	0.000620352			7.42927	-0.00168
												14.8	-0.000861					7.43723	0.000633525			7.43769	-0.00169
												14.8167	-0.000318					7.44565	0.000662638			7.44611	-0.00169
												14.8333	7.6e-05					7.45407	0.000702583			7.45453	-0.00168
												14.85	0.000109					7.46248	0.000747325			7.46294	-0.00165
												14.8667	-0.000148					7.4709	0.000791596			7.47136	-0.00162
												14.8833	-0.000525					7.47932	0.000829742			7.47978	-0.0016
												14.9	-0.000791					7.48773	0.000857471			7.48819	-0.00159
												14.9167	-0.000927					7.49615	0.000871475			7.49661	-0.0016
												14.9333	-0.000894					7.50457	0.000872051			7.50503	-0.00163
												14.95	-0.00086					7.51299	0.000866933			7.51345	-0.00166
												14.9667	-0.001076					7.5214	0.000868218			7.52186	-0.00169
												14.9833	-0.001292					7.52982	0.000878486			7.53028	-0.00172
												15	-0.001198					7.53824	0.000885982			7.5387	-0.00176
												15.0167	-0.001443					7.54666	0.000881372			7.54712	-0.0018
												15.0333	-0.001387					7.55507	0.000865534			7.55553	-0.00183
												15.05	-0.000972					7.56349	0.000845552			7.56395	-0.00186
												15.0667	-0.000476					7.57191	0.000827241			7.57237	-0.0019
												15.0833	-7.1e-05					7.58032	0.000815599			7.58078	-0.00195
												15.1	8.5e-05					7.58874	0.00081165			7.5892	-0.002
												15.1167	0.000335					7.59716	0.00080858			7.59762	-0.00205
												15.1333	0.000564					7.60558	0.000800688			7.60604	-0.0021
												15.15	0.000493					7.61399	0.000788001			7.61445	-0.00213
												15.1667	0.000193					7.62241	0.000774071			7.62287	-0.00214
												15.1833	7.2e-05					7.63083	0.00076234			7.63129	-0.00213
												15.2	0.000142					7.63925	0.000755091			7.63971	-0.00211
												15.2167	0.000288					7.64766	0.000751119			7.64812	-0.00208
												15.2333	0.000414					7.65608	0.000742781			7.65654	-0.00204
												15.25	0.000699					7.6645	0.000721336			7.66496	-0.00202
												15.2667	0.000945					7.67291	0.000687808			7.67338	-0.002
												15.2833	0.001241					7.68133	0.000655943			7.68179	-0.00199
												15.3	0.001408					7.68975	0.000637855			7.69021	-0.002
												15.3167	0.001182					7.69817	0.000628732			7.69863	-0.00201
												15.3333	0.000856					7.70658	0.000617996			7.70704	-0.00203
												15.35	0.000991					7.715	0.000598401			7.71546	-0.00204
												15.3667	0.001305					7.72342	0.000563828			7.72388	-0.00205
												15.3833	0.001059					7.73184	0.000516827			7.7323	-0.00206
												15.4	0.000664					7.74025	0.000473537			7.74071	-0.00208
												15.4167	0.000288					7.74867	0.00044628			7.74913	-0.00211
												15.4333	0.000391					7.75709	0.000432457			7.75755	-0.00215
												15.45	0.000654					7.7655	0.000422984			7.76597	-0.00217
												15.4667	0.000748					7.77392	0.000410606			7.77438	-0.00219
												15.4833	0.000711					7.78234	0.000391935			7.7828	-0.00218
												15.5	0.000615					7.79076	0.000369384			7.79122	-0.00217
												15.5167	0.000537					7.79917	0.000351653			7.79963	-0.00214
												15.5333	0.000569					7.80759	0.000344879			7.80805	-0.00211
												15.55	0.000571					7.81601	0.000346556			7.81647	-0.00206
												15.5667	0.000623					7.82443	0.000348628			7.82489	-0.00202
												15.5833	0.000585					7.83284	0.000343778			7.8333	-0.00198
												15.6	0.000357					7.84126	0.000330347			7.84172	-0.00196
												15.6167	-1.3e-05					7.84968	0.000310841			7.85014	-0.00197
												15.6333	-0.000254					7.85809	0.000287908			7.85856	-0.00199
												15.65	-0.000255					7.86651	0.000264047			7.86697	-0.00202
												15.6667	8.4e-05					7.87493	0.00024924			7.87539	-0.00204
												15.6833	0.000323					7.88335	0.000262341			7.88381	-0.00206
												15.7	0.000383					7.89176	0.000311552			7.89222	-0.00208
												15.7167	0.000657					7.90018	0.000385204			7.90064	-0.0021
												15.7333	0.000792					7.9086	0.000465366			7.90906	-0.00213
												15.75	0.000756					7.91702	0.000537881			7.91748	-0.00214
												15.7667	0.000341					7.92543	0.00059625			7.92589	-0.00213
												15.7833	-9.5e-05					7.93385	0.000639896			7.93431	-0.00212
												15.8	-0.00047					7.94227	0.000669634			7.94273	-0.00211
												15.8167	-0.000772					7.95068	0.000685185			7.95115	-0.00209
												15.8333	-0.001004					7.9591	0.000691335			7.95956	-0.00209
												15.85	-0.000956					7.96752	0.000695855			7.96798	-0.0021
												15.8667	-0.000859					7.97594	0.000698001			7.9764	-0.00211
												15.8833	-0.000991					7.98435	0.000690274			7.98481	-0.00212
												15.9	-0.000843					7.99277	0.000665291			7.99323	-0.00215
												15.9167	-0.000494					8.00119	0.000623213			8.00165	-0.00218
												15.9333	-0.000945					8.00961	0.000575498			8.01007	-0.0022
												15.95	-0.001955					8.01802	0.000531715			8.01848	-0.00222
												15.9667	-0.002386					8.02644	0.000492653			8.0269	-0.00221
												15.9833	-0.001247					8.03486	0.000455169			8.03532	-0.00221
												16	-0.001608					8.04327	0.000416174			8.04374	-0.00221
												16.0167	0.002772					8.05169	0.00037411			8.05215	-0.00221
												16.0333	0.005102					8.06011	0.000331928			8.06057	-0.0022
												16.05	-0.007798					8.06853	0.000296169			8.06899	-0.00218
												16.0667	-0.048648					8.07694	0.000273604			8.0774	-0.00214
												16.0833	-0.138918					8.08536	0.00026897			8.08582	-0.0021
												16.1	-0.265538					8.09378	0.000277148			8.09424	-0.00206
												16.1167	-0.404888					8.1022	0.000284677			8.10266	-0.00203
												16.1333	-0.533347					8.11061	0.000282043			8.11107	-0.00202
												16.15	-0.612097					8.11903	0.000266639			8.11949	-0.00203
												16.1667	-0.636077					8.12745	0.000242305			8.12791	-0.00204
												16.1833	-0.606856					8.13586	0.000216185			8.13633	-0.00206
												16.2	-0.564066					8.14428	0.000193746			8.14474	-0.00208
												16.2167	-0.512285					8.1527	0.000176223			8.15316	-0.0021
												16.2333	-0.471535					8.16112	0.000161539			8.16158	-0.0021
												16.25	-0.441804					8.16953	0.000147282			8.16999	-0.0021
												16.2667	-0.402673					8.17795	0.000132904			8.17841	-0.0021
												16.2833	-0.354553					8.18637	0.000118196			8.18683	-0.00211
												16.3	-0.305612					8.19479	0.000101368			8.19525	-0.00214
												16.3167	-0.263481					8.2032	8.52045e-05			8.20366	-0.00216
												16.3333	-0.232621					8.21162	7.83607e-05			8.21208	-0.00219
												16.35	-0.20681					8.22004	8.16208e-05			8.2205	-0.00221
												16.3667	-0.19306					8.22845	8.66328e-05			8.22892	-0.00223
												16.3833	-0.177629					8.23687	8.61166e-05			8.23733	-0.00225
												16.4	-0.160958					8.24529	7.83491e-05			8.24575	-0.00228
												16.4167	-0.144458					8.25371	6.96674e-05			8.25417	-0.00231
												16.4333	-0.129648					8.26212	7.60916e-05			8.26258	-0.00234
												16.45	-0.117938					8.27054	0.000109734			8.271	-0.00237
												16.4667	-0.106427					8.27896	0.000164824			8.27942	-0.00241
												16.4833	-0.095467					8.28738	0.000227531			8.28784	-0.00244
												16.5	-0.084087					8.29579	0.000288273			8.29625	-0.00246
												16.5167	-0.074917					8.30421	0.000341325			8.30467	-0.00246
												16.5333	-0.068187					8.31263	0.000383105			8.31309	-0.00245
												16.55	-0.062187					8.32104	0.000412912			8.32151	-0.00244
												16.5667	-0.057968					8.32946	0.000434			8.32992	-0.00242
												16.5833	-0.054318					8.33788	0.00044972			8.33834	-0.0024
												16.6	-0.050938					8.3463	0.000459769			8.34676	-0.00238
												16.6167	-0.046739					8.35471	0.000458597			8.35517	-0.00236
												16.6333	-0.04203					8.36313	0.000434123			8.36359	-0.00233
												16.65	-0.037771					8.37155	0.000377817			8.37201	-0.00229
												16.6667	-0.034142					8.37997	0.000303141			8.38043	-0.00224
												16.6833	-0.031093					8.38838	0.000234476			8.38884	-0.0022
												16.7	-0.028584					8.3968	0.000180347			8.39726	-0.00217
												16.7167	-0.026247					8.40522	0.000134885			8.40568	-0.00214
												16.7333	-0.024199					8.41364	9.15803e-05			8.4141	-0.00212
												16.75	-0.022601					8.42205	4.79689e-05			8.42251	-0.00212
												16.7667	-0.021153					8.43047	8.09891e-06			8.43093	-0.00216
												16.7833	-0.019375					8.43889	-1.70697e-05			8.43935	-0.00221
												16.8	-0.017357					8.4473	-2.22043e-05			8.44776	-0.00227
												16.8167	-0.01539					8.45572	-1.27715e-05			8.45618	-0.00234
												16.8333	-0.013374					8.46414	9.56878e-06			8.4646	-0.00241
												16.85	-0.011507					8.47256	4.958e-05			8.47302	-0.0025
												16.8667	-0.009901					8.48097	0.000104778			8.48143	-0.00258
												16.8833	-0.008634					8.48939	0.000162974			8.48985	-0.00266
												16.9	-0.007837					8.49781	0.000214405			8.49827	-0.0027
												16.9167	-0.007352					8.50623	0.0002511			8.50669	-0.00273
												16.9333	-0.006997					8.51464	0.000260361			8.5151	-0.00275
												16.95	-0.006932					8.52306	0.000240714			8.52352	-0.00277
												16.9667	-0.006607					8.53148	0.000220522			8.53194	-0.0028
												16.9833	-0.005912					8.53989	0.000229292			8.54035	-0.00282
												17	-0.005167					8.54831	0.000265463			8.54877	-0.00284
												17.0167	-0.004514					8.55673	0.000311585			8.55719	-0.00286
												17.0333	-0.003711					8.56515	0.000354165			8.56561	-0.00287
												17.05	-0.003278					8.57356	0.000387276			8.57402	-0.00289
												17.0667	-0.003194					8.58198	0.000411363			8.58244	-0.00292
												17.0833	-0.002711					8.5904	0.000429418			8.59086	-0.00295
												17.1	-0.002118					8.59882	0.000442316			8.59928	-0.00297
												17.1167	-0.001757					8.60723	0.000447654			8.60769	-0.00299
												17.1333	-0.001795					8.61565	0.00044081			8.61611	-0.00298
												17.15	-0.001964					8.62407	0.000419057			8.62453	-0.00296
												17.1667	-0.002333					8.63248	0.000386144			8.63294	-0.00291
												17.1833	-0.002892					8.6409	0.000349028			8.64136	-0.00287
												17.2	-0.003371					8.64932	0.000316491			8.64978	-0.00282
												17.2167	-0.003512					8.65774	0.000298582			8.6582	-0.00279
												17.2333	-0.003343					8.66615	0.000296601			8.66661	-0.00276
												17.25	-0.002974					8.67457	0.000299224			8.67503	-0.00274
												17.2667	-0.002755					8.68299	0.000297399			8.68345	-0.0027
												17.2833	-0.002467					8.69141	0.000289926			8.69187	-0.00267
												17.3	-0.002038					8.69982	0.000279265			8.70028	-0.00263
												17.3167	-0.002031					8.70824	0.000266026			8.7087	-0.00261
												17.3333	-0.002035					8.71666	0.000250793			8.71712	-0.00261
												17.35	-0.001799					8.72507	0.000239501			8.72554	-0.00261
												17.3667	-0.001663					8.73349	0.000238911			8.73395	-0.00262
												17.3833	-0.001446					8.74191	0.000250808			8.74237	-0.00261
												17.4	-0.00109					8.75033	0.000273011			8.75079	-0.0026
												17.4167	-0.000816					8.75874	0.000299311			8.7592	-0.00259
												17.4333	-0.000663					8.76716	0.000324897			8.76762	-0.00258
												17.45	-0.000709					8.77558	0.000349929			8.77604	-0.00257
												17.4667	-0.000805					8.784	0.00037596			8.78446	-0.00256
												17.4833	-0.000952					8.79241	0.000401956			8.79287	-0.00258
												17.5	-0.001188					8.80083	0.000425298			8.80129	-0.0026
												17.5167	-0.001056					8.80925	0.000443469			8.80971	-0.00264
												17.5333	-0.000785					8.81766	0.000453307			8.81813	-0.00267
												17.55	-0.000463					8.82608	0.000449735			8.82654	-0.00269
												17.5667	-0.000301					8.8345	0.000432869			8.83496	-0.00271
												17.5833	9.1e-05					8.84292	0.000410926			8.84338	-0.00273
												17.6	0.000483					8.85133	0.000387647			8.85179	-0.00276
												17.6167	0.000825					8.85975	0.000359947			8.86021	-0.00277
												17.6333	0.000806					8.86817	0.000322373			8.86863	-0.00278
												17.65	0.000578					8.87659	0.000267934			8.87705	-0.00279
												17.6667	0.00038					8.885	0.000193876			8.88546	-0.00279
												17.6833	0.000112					8.89342	0.000108752			8.89388	-0.00279
												17.7	-0.000106					8.90184	2.7278e-05			8.9023	-0.00279
												17.7167	-0.000323					8.91025	-4.39746e-05			8.91072	-0.00278
												17.7333	-0.000699					8.91867	-0.00010892			8.91913	-0.00276
												17.75	-0.001036					8.92709	-0.000172376			8.92755	-0.00274
												17.7667	-0.000952					8.93551	-0.000233351			8.93597	-0.00273
												17.7833	-0.000648					8.94392	-0.000281023			8.94438	-0.00272
												17.8	-0.000445					8.95234	-0.000302834			8.9528	-0.00272
												17.8167	-0.000358					8.96076	-0.00030034			8.96122	-0.0027
												17.8333	0.00014					8.96918	-0.00028681			8.96964	-0.00269
												17.85	0.000527					8.97759	-0.000272641			8.97805	-0.00267
												17.8667	0.000694					8.98601	-0.000261649			8.98647	-0.00264
												17.8833	0.000611					8.99443	-0.000254952			8.99489	-0.00261
												17.9	0.000629					9.00284	-0.000254807			9.00331	-0.00257
												17.9167	0.000702					9.01126	-0.000266272			9.01172	-0.00253
												17.9333	0.000965					9.01968	-0.000285394			9.02014	-0.00249
												17.95	0.001678					9.0281	-0.000290929			9.02856	-0.00246
												17.9667	0.001731					9.03651	-0.000267646			9.03697	-0.00245
												17.9833	0.001824					9.04493	-0.000227028			9.04539	-0.00246
												18	0.001777					9.05335	-0.000193558			9.05381	-0.00249
												18.0167	0.001597					9.06177	-0.000186057			9.06223	-0.00254
												18.0333	0.001907					9.07018	-0.000215026			9.07064	-0.00259
												18.05	0.002257					9.0786	-0.000267797			9.07906	-0.0026
												18.0667	0.002358					9.08702	-0.000315885			9.08748	-0.00259
												18.0833	0.002168					9.09543	-0.000347787			9.0959	-0.00256
												18.1	0.001218					9.10385	-0.000360979			9.10431	-0.00253
												18.1167	0.000693					9.11227	-0.000356502			9.11273	-0.0025
												18.1333	0.000749					9.12069	-0.000345445			9.12115	-0.0025
												18.15	0.000655					9.1291	-0.00033979			9.12956	-0.00251
												18.1667	0.000191					9.13752	-0.000347266			9.13798	-0.00255
												18.1833	-0.000344					9.14594	-0.000370051			9.1464	-0.00261
												18.2	-0.000718					9.15436	-0.000403932			9.15482	-0.00266
												18.2167	-0.00084					9.16277	-0.000441653			9.16323	-0.00271
												18.2333	-0.000931					9.17119	-0.000480691			9.17165	-0.00275
												18.25	-0.001263					9.17961	-0.000522607			9.18007	-0.00279
												18.2667	-0.001655					9.18802	-0.000564588			9.18849	-0.00282
												18.2833	-0.002076					9.19644	-0.000596216			9.1969	-0.00286
												18.3	-0.001388					9.20486	-0.00061056			9.20532	-0.00289
												18.3167	-0.00083					9.21328	-0.000609978			9.21374	-0.00292
												18.3333	-0.000661					9.22169	-0.000595265			9.22215	-0.00294
												18.35	-0.000623					9.23011	-0.000566016			9.23057	-0.00296
												18.3667	-0.001014					9.23853	-0.000526904			9.23899	-0.00297
												18.3833	-0.001066					9.24695	-0.000484885			9.24741	-0.00296
												18.4	-0.000807					9.25536	-0.000446363			9.25582	-0.00296
												18.4167	-0.001009					9.26378	-0.000414961			9.26424	-0.00295
												18.4333	-0.000192					9.2722	-0.000392047			9.27266	-0.00295
												18.45	0.000806					9.28061	-0.000378188			9.28108	-0.00297
												18.4667	0.001314					9.28903	-0.000372051			9.28949	-0.00301
												18.4833	0.000292					9.29745	-0.000371264			9.29791	-0.00305
												18.5	-0.004351					9.30587	-0.000377164			9.30633	-0.00309
												18.5167	-0.008984					9.31428	-0.000395029			9.31474	-0.00312
												18.5333	-0.010117					9.3227	-0.00042229			9.32316	-0.00313
												18.55	-0.01188					9.33112	-0.000444005			9.33158	-0.00312
												18.5667	-0.035623					9.33954	-0.000449355			9.34	-0.00309
												18.5833	-0.092346					9.34795	-0.000435168			9.34841	-0.00307
												18.6	-0.173579					9.35637	-0.000400475			9.35683	-0.00304
												18.6167	-0.269242					9.36479	-0.000350316			9.36525	-0.00301
												18.6333	-0.363556					9.3732	-0.00029456			9.37367	-0.00298
												18.65	-0.42611					9.38162	-0.000242471			9.38208	-0.00295
												18.6667	-0.450703					9.39004	-0.000200819			9.3905	-0.00293
												18.6833	-0.446137					9.39846	-0.000177349			9.39892	-0.00291
												18.7	-0.418601					9.40687	-0.000176851			9.40733	-0.00289
												18.7167	-0.389345					9.41529	-0.000193228			9.41575	-0.00286
												18.7333	-0.364889					9.42371	-0.000215554			9.42417	-0.00283
												18.75	-0.349384					9.43213	-0.00023638			9.43259	-0.0028
												18.7667	-0.321178					9.44054	-0.000255607			9.441	-0.00278
												18.7833	-0.285223					9.44896	-0.000278813			9.44942	-0.00277
												18.8	-0.244207					9.45738	-0.000316058			9.45784	-0.00276
												18.8167	-0.208132					9.46579	-0.000370034			9.46626	-0.00276
												18.8333	-0.183377					9.47421	-0.000421353			9.47467	-0.00276
												18.85	-0.171472					9.48263	-0.000447609			9.48309	-0.00276
												18.8667	-0.159627					9.49105	-0.00044961			9.49151	-0.00276
												18.8833	-0.146552					9.49946	-0.000441639			9.49992	-0.00275
												18.9	-0.133977					9.50788	-0.000434194			9.50834	-0.00273
												18.9167	-0.121233					9.5163	-0.000427939			9.51676	-0.00272
												18.9333	-0.108289					9.52472	-0.00041796			9.52518	-0.0027
												18.95	-0.096394					9.53313	-0.000398938			9.53359	-0.0027
												18.9667	-0.08534					9.54155	-0.000370753			9.54201	-0.00269
												18.9833	-0.077716					9.54997	-0.000342212			9.55043	-0.00269
												19	-0.071571					9.55838	-0.000320193			9.55885	-0.00268
												19.0167	-0.066367					9.5668	-0.000304762			9.56726	-0.00266
												19.0333	-0.061214					9.57522	-0.000292403			9.57568	-0.00262
												19.05	-0.0565					9.58364	-0.0002783			9.5841	-0.00258
												19.0667	-0.051976					9.59205	-0.000253242			9.59251	-0.00255
												19.0833	-0.046553					9.60047	-0.000212897			9.60093	-0.00252
												19.1	-0.041369					9.60889	-0.000166247			9.60935	-0.00249
												19.1167	-0.036256					9.61731	-0.00011891			9.61777	-0.00247
												19.1333	-0.032952					9.62572	-6.94132e-05			9.62618	-0.00247
												19.15	-0.029799					9.63414	-1.85024e-05			9.6346	-0.00248
												19.1667	-0.027346					9.64256	2.97213e-05			9.64302	-0.0025
												19.1833	-0.025003					9.65097	7.23299e-05			9.65144	-0.00254
												19.2	-0.02266					9.65939	0.000109692			9.65985	-0.00259
												19.2167	-0.020557					9.66781	0.000143068			9.66827	-0.00264
												19.2333	-0.018594					9.67623	0.00017156			9.67669	-0.00268
												19.25	-0.016532					9.68464	0.00019235			9.6851	-0.0027
												19.2667	-0.014449					9.69306	0.000200836			9.69352	-0.00272
												19.2833	-0.012607					9.70148	0.00019242			9.70194	-0.00273
												19.3	-0.011154					9.7099	0.000170716			9.71036	-0.00273
												19.3167	-0.010042					9.71831	0.000156365			9.71877	-0.00274
												19.3333	-0.00876					9.72673	0.000173628			9.72719	-0.00276
												19.35	-0.007737					9.73515	0.000220816			9.73561	-0.00279
												19.3667	-0.006925					9.74356	0.000278198			9.74403	-0.00283
												19.3833	-0.006343					9.75198	0.00033148			9.75244	-0.00286
												19.4	-0.006131					9.7604	0.000374924			9.76086	-0.00288
												19.4167	-0.005859					9.76882	0.00040691			9.76928	-0.00291
												19.4333	-0.005538					9.77723	0.000428994			9.77769	-0.00292
												19.45	-0.005336					9.78565	0.000444544			9.78611	-0.00293
												19.4667	-0.004964					9.79407	0.000453484			9.79453	-0.00292
												19.4833	-0.004223					9.80249	0.000449422			9.80295	-0.0029
												19.5	-0.003331					9.8109	0.000422464			9.81136	-0.00288
												19.5167	-0.00249					9.81932	0.000371095			9.81978	-0.00286
												19.5333	-0.001819					9.82774	0.000307252			9.8282	-0.00284
												19.55	-0.001358					9.83615	0.000249478			9.83662	-0.00282
												19.5667	-0.001236					9.84457	0.000212042			9.84503	-0.0028
												19.5833	-0.001155					9.85299	0.00019435			9.85345	-0.00277
												19.6	-0.000934					9.86141	0.000188876			9.86187	-0.00275
												19.6167	-0.000663					9.86982	0.000189865			9.87029	-0.00273
												19.6333	-0.000312					9.87824	0.0001919			9.8787	-0.00271
												19.65	0.000138					9.88666	0.000189861			9.88712	-0.00269
												19.6667	0.000289					9.89508	0.00018165			9.89554	-0.00268
												19.6833	0.00026					9.90349	0.000169435			9.90395	-0.00266
												19.7	0.000121					9.91191	0.000158461			9.91237	-0.00265
												19.7167	-6.9e-05					9.92033	0.000151737			9.92079	-0.00264
												19.7333	-4.8e-05					9.92874	0.000148476			9.92921	-0.00264
												19.75	0.000172					9.93716	0.000149401			9.93762	-0.00265
												19.7667	0.000562					9.94558	0.000161076			9.94604	-0.00268
												19.7833	0.000943					9.954	0.000186764			9.95446	-0.00273
												19.8	0.001143					9.96241	0.000218248			9.96288	-0.00278
												19.8167	0.001063					9.97083	0.000247691			9.97129	-0.00284
												19.8333	0.000843					9.97925	0.000272001			9.97971	-0.00289
												19.85	0.000533					9.98767	0.000288272			9.98813	-0.00291
												19.8667	0.000402					9.99608	0.000291645			9.99654	-0.00292
												19.8833	0.000192					10.0045	0.000280944			10.005	-0.00293
												19.9	0.000162					10.0129	0.00026056			10.0134	-0.00293
												19.9167	-3.9e-05					10.0213	0.000232759			10.0218	-0.00293
												19.9333	-0.000281					10.0297	0.000199022			10.0302	-0.00294
												19.95	-0.000173					10.0382	0.000162503			10.0386	-0.00295
												19.9667	-0.000115					10.0466	0.000126981			10.0471	-0.00294
												19.9833	-0.000276					10.055	9.6107e-05			10.0555	-0.00292
												20	-0.000208					10.0634	7.03535e-05			10.0639	-0.0029
												20.0167	-2.2e-05					10.0718	4.68567e-05			10.0723	-0.00289
												20.0333	0.000123					10.0803	2.42661e-05			10.0807	-0.00289
												20.05	0.000299					10.0887	6.87576e-06			10.0891	-0.0029
												20.0667	0.000464					10.0971	1.03906e-07			10.0976	-0.0029
												20.0833	0.000319					10.1055	3.99868e-06			10.106	-0.0029
												20.1	-4.5e-05					10.1139	1.90405e-05			10.1144	-0.00291
												20.1167	-0.000473					10.1223	4.35836e-05			10.1228	-0.00292
												20.1333	-0.000582					10.1308	6.99318e-05			10.1312	-0.00293
												20.15	-0.0006					10.1392	9.27172e-05			10.1396	-0.00293
												20.1667	-0.000759					10.1476	0.000111931			10.1481	-0.00294
												20.1833	-0.000707					10.156	0.000129103			10.1565	-0.00295
												20.2	-0.000546					10.1644	0.000145344			10.1649	-0.00297
												20.2167	-0.000179					10.1729	0.000162942			10.1733	-0.00298
												20.2333	6.8e-05					10.1813	0.000184097			10.1817	-0.00299
												20.25	0.000164					10.1897	0.000209019			10.1901	-0.003
												20.2667	0.0001					10.1981	0.000239938			10.1986	-0.00301
												20.2833	-0.000223					10.2065	0.000281432			10.207	-0.00304
												20.3	-0.000307					10.2149	0.000334734			10.2154	-0.00307
												20.3167	-7.5e-05					10.2233	0.000394394			10.2238	-0.00311
												20.3333	-0.000144					10.2318	0.000450871			10.2322	-0.00315
												20.35	-0.000504					10.2402	0.000497056			10.2407	-0.00318
												20.3667	-0.000803					10.2486	0.000529857			10.2491	-0.00321
												20.3833	-0.000932					10.257	0.000549223			10.2575	-0.00324
												20.4	-0.000801					10.2654	0.000558029			10.2659	-0.00327
												20.4167	-0.000815					10.2738	0.000558882			10.2743	-0.0033
												20.4333	-0.00094					10.2823	0.000551813			10.2827	-0.00333
												20.45	-0.001115					10.2907	0.000533902			10.2912	-0.00336
												20.4667	-0.00138					10.2991	0.000503174			10.2996	-0.00338
												20.4833	-0.001265					10.3075	0.000463862			10.308	-0.00338
												20.5	-0.00077					10.3159	0.000423158			10.3164	-0.00339
												20.5167	-0.000388					10.3244	0.000384887			10.3248	-0.00339
												20.5333	-0.000108					10.3328	0.000352549			10.3332	-0.00337
												20.55	0.000203					10.3412	0.00033243			10.3416	-0.00334
												20.5667	0.000163					10.3496	0.000329276			10.3501	-0.00331
												20.5833	0.000213					10.358	0.000343816			10.3585	-0.00327
												20.6	0.000104					10.3664	0.000370054			10.3669	-0.00323
												20.6167	-0.000298					10.3749	0.000395471			10.3753	-0.0032
												20.6333	-0.001061					10.3833	0.000409106			10.3837	-0.00317
												20.65	-0.001873					10.3917	0.000405445			10.3922	-0.00314
												20.6667	-0.002365					10.4001	0.000388596			10.4006	-0.00313
												20.6833	-0.002388					10.4085	0.000371663			10.409	-0.00312
												20.7	-0.0019					10.4169	0.000365693			10.4174	-0.00312
												20.7167	-0.001423					10.4254	0.000368387			10.4258	-0.00313
												20.7333	-0.001355					10.4338	0.000369704			10.4342	-0.00313
												20.75	-0.000988					10.4422	0.000361879			10.4427	-0.00315
												20.7667	-0.0007					10.4506	0.000339573			10.4511	-0.00316
												20.7833	-0.000492					10.459	0.000304579			10.4595	-0.00315
												20.8	-0.000205					10.4674	0.000267593			10.4679	-0.00313
												20.8167	-0.000124					10.4759	0.000236483			10.4763	-0.00311
												20.8333	0.000899					10.4843	0.00021128			10.4848	-0.0031
												20.85	0.001761					10.4927	0.000186642			10.4932	-0.00311
												20.8667	0.001653					10.5011	0.000156027			10.5016	-0.00312
												20.8833	0.001656					10.5095	0.000120884			10.51	-0.00311
												20.9	0.002568					10.518	9.80034e-05			10.5184	-0.00308
												20.9167	0.004677					10.5264	9.8614e-05			10.5268	-0.00305
												20.9333	0.006719					10.5348	0.000115073			10.5352	-0.00303
												20.95	0.00795					10.5432	0.000142554			10.5437	-0.00301
												20.9667	0.009232					10.5516	0.000182535			10.5521	-0.003
												20.9833	0.011813					10.56	0.000230576			10.5605	-0.00301
												21	0.019725					10.5685	0.000278362			10.5689	-0.00302
												21.0167	0.016124					10.5769	0.000320477			10.5773	-0.00301
												21.0333	0.002635					10.5853	0.000354628			10.5858	-0.003
												21.05	-0.009104					10.5937	0.000377583			10.5942	-0.00299
												21.0667	-0.017312					10.6021	0.000388426			10.6026	-0.00297
												21.0833	-0.040841					10.6105	0.000394435			10.611	-0.00295
												21.1	-0.08615					10.619	0.000402982			10.6194	-0.00291
												21.1167	-0.150662					10.6274	0.00041428			10.6278	-0.00286
												21.1333	-0.222182					10.6358	0.000424485			10.6363	-0.00282
												21.15	-0.275542					10.6442	0.000430748			10.6447	-0.00277
												21.1667	-0.306002					10.6526	0.000434193			10.6531	-0.00273
												21.1833	-0.307902					10.661	0.000438131			10.6615	-0.00268
												21.2	-0.289432					10.6695	0.000444813			10.6699	-0.00264
												21.2167	-0.269787					10.6779	0.000455761			10.6783	-0.0026
												21.2333	-0.249109					10.6863	0.000470345			10.6868	-0.00258
												21.25	-0.228882					10.6947	0.000484548			10.6952	-0.00257
												21.2667	-0.204205					10.7031	0.00049462			10.7036	-0.00255
												21.2833	-0.186627					10.7116	0.000498796			10.712	-0.00253
												21.3	-0.16757					10.72	0.000496717			10.7204	-0.00251
												21.3167	-0.145398					10.7284	0.000486964			10.7288	-0.00249
												21.3333	-0.128285					10.7368	0.000468435			10.7373	-0.00248
												21.35	-0.114851					10.7452	0.000443686			10.7457	-0.00249
												21.3667	-0.103448					10.7536	0.000417311			10.7541	-0.00251
												21.3833	-0.090854					10.7621	0.000392355			10.7625	-0.00256
												21.4	-0.079041					10.7705	0.000367962			10.7709	-0.00261
												21.4167	-0.070124					10.7789	0.000341802			10.7794	-0.00264
												21.4333	-0.066075					10.7873	0.000312751			10.7878	-0.00265
												21.45	-0.062757					10.7957	0.000281614			10.7962	-0.00266
												21.4667	-0.057908					10.8041	0.000250411			10.8046	-0.00267
												21.4833	-0.05406					10.8126	0.000224511			10.813	-0.00268
												21.5	-0.051392					10.821	0.000209649			10.8214	-0.00269
												21.5167	-0.046941					10.8294	0.000205573			10.8299	-0.00269
												21.5333	-0.041789					10.8378	0.000209753			10.8383	-0.00269
												21.55	-0.039657					10.8462	0.000216407			10.8467	-0.00269
												21.5667	-0.038954					10.8546	0.00021566			10.8551	-0.0027
												21.5833	-0.037132					10.8631	0.000202113			10.8635	-0.0027
												21.6	-0.03477					10.8715	0.000182224			10.8719	-0.0027
												21.6167	-0.033297					10.8799	0.000175661			10.8804	-0.0027
												21.6333	-0.031802					10.8883	0.000200944			10.8888	-0.00269
												21.65	-0.030338					10.8967	0.000254908			10.8972	-0.00268
												21.6667	-0.028553					10.9052	0.000315117			10.9056	-0.00267
												21.6833	-0.026319					10.9136	0.000364621			10.914	-0.00267
												21.7	-0.024714					10.922	0.000395031			10.9224	-0.00267
												21.7167	-0.024249					10.9304	0.000405963			10.9309	-0.00269
												21.7333	-0.022983					10.9388	0.000406992			10.9393	-0.00273
												21.75	-0.021808					10.9472	0.00040465			10.9477	-0.00276
												21.7667	-0.020872					10.9557	0.00039923			10.9561	-0.0028
												21.7833	-0.019276					10.9641	0.000389926			10.9645	-0.00284
												21.8	-0.017611					10.9725	0.000376189			10.973	-0.00288
												21.8167	-0.016185					10.9809	0.000353996			10.9814	-0.00291
												21.8333	-0.014709					10.9893	0.00031606			10.9898	-0.00294
												21.85	-0.013194					10.9977	0.00026339			10.9982	-0.00295
												21.8667	-0.011618					11.0062	0.000209648			11.0066	-0.00295
												21.8833	-0.010243					11.0146	0.000166182			11.015	-0.00295
												21.9	-0.009217					11.023	0.000134942			11.0235	-0.00295
												21.9167	-0.008422					11.0314	0.000112357			11.0319	-0.00295
												21.9333	-0.007608					11.0398	8.85526e-05			11.0403	-0.00295
												21.95	-0.006264					11.0482	5.23718e-05			11.0487	-0.00296
												21.9667	-0.004889					11.0567	1.79012e-06			11.0571	-0.00298
												21.9833	-0.003765					11.0651	-5.32792e-05			11.0655	-0.003
												22	-0.002801					11.0735	-9.95279e-05			11.074	-0.00302
												22.0167	-0.002558					11.0819	-0.000131029			11.0824	-0.00303
												22.0333	-0.002396					11.0903	-0.000144851			11.0908	-0.00302
												22.05	-0.002045					11.0988	-0.000143877			11.0992	-0.003
												22.0667	-0.001683					11.1072	-0.00014097			11.1076	-0.00299
												22.0833	-0.001211					11.1156	-0.000146525			11.116	-0.00301
												22.1	-0.000749					11.124	-0.000163536			11.1245	-0.00304
												22.1167	-0.00043					11.1324	-0.000188456			11.1329	-0.00307
												22.1333	-0.000572					11.1408	-0.000216046			11.1413	-0.0031
												22.15	-0.000814					11.1493	-0.000246101			11.1497	-0.00313
												22.1667	-0.001156					11.1577	-0.000282101			11.1581	-0.00316
												22.1833	-0.001728					11.1661	-0.000321783			11.1666	-0.00319
												22.2	-0.00214					11.1745	-0.000356974			11.175	-0.00319
												22.2167	-0.002276					11.1829	-0.000384237			11.1834	-0.00317
												22.2333	-0.002413					11.1913	-0.000403081			11.1918	-0.00313
												22.25	-0.002459					11.1997	-0.000411435			11.2002	-0.0031
												22.2667	-0.002316					11.2082	-0.000408211			11.2086	-0.00306
												22.2833	-0.002483					11.2166	-0.000397879			11.2171	-0.00303
												22.3	-0.00288					11.225	-0.00039001			11.2255	-0.003
												22.3167	-0.003072					11.2334	-0.000393503			11.2339	-0.00298
												22.3333	-0.003255					11.2418	-0.000413243			11.2423	-0.00296
												22.35	-0.003278					11.2503	-0.000446557			11.2507	-0.00295
												22.3667	-0.003252					11.2587	-0.000483584			11.2591	-0.00295
												22.3833	-0.003135					11.2671	-0.000518453			11.2675	-0.00294
												22.4	-0.003158					11.2755	-0.000549974			11.276	-0.00293
												22.4167	-0.003156					11.2839	-0.000579048			11.2844	-0.00292
												22.4333	-0.003166					11.2923	-0.000610228			11.2928	-0.00291
												22.45	-0.003186					11.3008	-0.000650109			11.3012	-0.00292
												22.4667	-0.002877					11.3092	-0.000703689			11.3096	-0.00295
												22.4833	-0.002477					11.3176	-0.000762328			11.3181	-0.00298
												22.5	-0.002137					11.326	-0.000805183			11.3265	-0.00301
												22.5167	-0.00154					11.3344	-0.000825362			11.3349	-0.00304
												22.5333	-0.000945					11.3429	-0.00083419			11.3433	-0.00305
												22.55	-0.00053					11.3513	-0.000840965			11.3517	-0.00306
												22.5667	-0.000255					11.3597	-0.000846662			11.3601	-0.00307
												22.5833	-0.00039					11.3681	-0.000847879			11.3686	-0.00308
												22.6	-0.000905					11.3765	-0.00084312			11.377	-0.00309
												22.6167	-0.00134					11.3849	-0.000836136			11.3854	-0.00311
												22.6333	-0.001734					11.3933	-0.000829767			11.3938	-0.00314
												22.65	-0.002069					11.4018	-0.000821553			11.4022	-0.00319
												22.6667	-0.002014					11.4102	-0.000806613			11.4107	-0.00326
												22.6833	-0.001398					11.4186	-0.000785871			11.4191	-0.00334
												22.7	0.000147					11.427	-0.000765922			11.4275	-0.0034
												22.7167	0.001367					11.4354	-0.000750755			11.4359	-0.00342
												22.7333	0.002129					11.4438	-0.000737557			11.4443	-0.00342
												22.75	0.00254					11.4523	-0.000720177			11.4527	-0.00341
												22.7667	0.002442					11.4607	-0.000696165			11.4611	-0.00341
												22.7833	0.002164					11.4691	-0.000668965			11.4696	-0.00342
												22.8	0.002296					11.4775	-0.00064429			11.478	-0.00345
												22.8167	0.002717					11.4859	-0.000627542			11.4864	-0.00349
												22.8333	0.002701					11.4944	-0.000624535			11.4948	-0.00352
												22.85	0.002306					11.5028	-0.000635641			11.5032	-0.00356
												22.8667	0.00219					11.5112	-0.000653758			11.5116	-0.00358
												22.8833	0.002535					11.5196	-0.000674106			11.5201	-0.00357
												22.9	0.003079					11.528	-0.000692264			11.5285	-0.00353
												22.9167	0.003383					11.5364	-0.000700399			11.5369	-0.00347
												22.9333	0.003743					11.5449	-0.000696611			11.5453	-0.00342
												22.95	0.003563					11.5533	-0.000686438			11.5537	-0.00337
												22.9667	0.003732					11.5617	-0.000673548			11.5622	-0.00332
												22.9833	0.003822					11.5701	-0.000655908			11.5706	-0.00327
												23	0.003511					11.5785	-0.000631696			11.579	-0.00322
												23.0167	0.00296					11.5869	-0.000606152			11.5874	-0.00318
												23.0333	0.001952					11.5954	-0.000587269			11.5958	-0.00314
												23.05	0.001105					11.6038	-0.000581645			11.6042	-0.00312
												23.0667	0.000718					11.6122	-0.000595144			11.6127	-0.00311
												23.0833	0.000621					11.6206	-0.000622771			11.6211	-0.00312
												23.1	0.000744					11.629	-0.000643043			11.6295	-0.00312
												23.1167	0.000582					11.6374	-0.000639887			11.6379	-0.00311
												23.1333	0.000333					11.6459	-0.000616711			11.6463	-0.0031
												23.15	0.000293					11.6543	-0.000583136			11.6547	-0.00309
												23.1667	0.000274					11.6627	-0.000546327			11.6632	-0.00308
												23.1833	0.000135					11.6711	-0.000513154			11.6716	-0.00309
												23.2	-4.5e-05					11.6795	-0.000489261			11.68	-0.00312
												23.2167	-0.000413					11.688	-0.000479688			11.6884	-0.00314
												23.2333	-0.001092					11.6964	-0.000486084			11.6968	-0.00316
												23.25	-0.00213					11.7048	-0.000501747			11.7052	-0.00317
												23.2667	-0.002788					11.7132	-0.000518673			11.7137	-0.00317
												23.2833	-0.003086					11.7216	-0.000533765			11.7221	-0.00316
												23.3	-0.003224					11.73	-0.000545449			11.7305	-0.00315
												23.3167	-0.003126					11.7385	-0.000548929			11.7389	-0.00312
												23.3333	-0.002388					11.7469	-0.000540368			11.7473	-0.00309
												23.35	-0.001411					11.7553	-0.000522884			11.7558	-0.00306
												23.3667	-0.001084					11.7637	-0.000500764			11.7642	-0.00304
												23.3833	-0.001496					11.7721	-0.000476087			11.7726	-0.00302
												23.4	-0.001559					11.7805	-0.000449771			11.781	-0.003
												23.4167	-0.001326					11.789	-0.000422718			11.7894	-0.00299
												23.4333	-0.001736					11.7974	-0.000397807			11.7978	-0.00298
												23.45	-0.002105					11.8058	-0.000382083			11.8063	-0.00299
												23.4667	-0.000995					11.8142	-0.000381914			11.8147	-0.00302
												23.4833	0.002665					11.8226	-0.000390619			11.8231	-0.00307
												23.5	0.008506					11.831	-0.000383275			11.8315	-0.00311
												23.5167	0.014241					11.8395	-0.000334968			11.8399	-0.00314
												23.5333	0.015714					11.8479	-0.000252701			11.8483	-0.00316
												23.55	0.014927					11.8563	-0.000167589			11.8568	-0.00317
												23.5667	0.01001					11.8647	-0.000101609			11.8652	-0.00319
												23.5833	-0.013827					11.8731	-6.31598e-05			11.8736	-0.00322
												23.6	-0.045934					11.8816	-4.43897e-05			11.882	-0.00326
												23.6167	-0.082725					11.89	-2.64716e-05			11.8904	-0.00329
												23.6333	-0.132629					11.8984	-2.24022e-06			11.8988	-0.00331
												23.65	-0.172643					11.9068	2.45211e-05			11.9073	-0.00335
												23.6667	-0.189737					11.9152	4.96966e-05			11.9157	-0.00339
												23.6833	-0.190411					11.9236	7.10829e-05			11.9241	-0.00344
												23.7	-0.178945					11.9321	8.75436e-05			11.9325	-0.00348
												23.7167	-0.154823					11.9405	0.000100938			11.9409	-0.00352
												23.7333	-0.133624					11.9489	0.000121316			11.9494	-0.00355
												23.75	-0.116395					11.9573	0.000161883			11.9578	-0.00357
												23.7667	-0.101596					11.9657	0.000220242			11.9662	-0.00358
												23.7833	-0.093896					11.9741	0.000280414			11.9746	-0.00356
												23.8	-0.085327					11.9826	0.000332026			11.983	-0.00353
												23.8167	-0.076682					11.991	0.000373093			11.9914	-0.00349
												23.8333	-0.070749					11.9994	0.000405668			11.9999	-0.00347
												23.85	-0.065696					12.0078	0.00043175			12.0083	-0.00347
												23.8667	-0.061823					12.0162	0.000449292			12.0167	-0.00349
												23.8833	-0.05791					12.0246	0.000455021			12.0251	-0.0035
												23.9	-0.053028					12.0331	0.000447207			12.0335	-0.00349
												23.9167	-0.048318					12.0415	0.000429315			12.0419	-0.00347
												23.9333	-0.042852					12.0499	0.000408602			12.0504	-0.00345
												23.95	-0.037375					12.0583	0.000388866			12.0588	-0.00345
												23.9667	-0.032948					12.0667	0.000370126			12.0672	-0.00347
												23.9833	-0.030221					12.0752	0.000350977			12.0756	-0.00352
												24	-0.027205					12.0836	0.000327995			12.084	-0.00357
												24.0167	-0.023071					12.092	0.000293988			12.0924	-0.00362
												24.0333	-0.01767					12.1004	0.000239371			12.1009	-0.00365
												24.05	-0.011239					12.1088	0.00016163			12.1093	-0.00366
												24.0667	-0.008798					12.1172	7.30419e-05			12.1177	-0.00367
												24.0833	-0.003548					12.1257	-9.97661e-06			12.1261	-0.00368
												24.1	0.035833					12.1341	-7.92567e-05			12.1345	-0.00371
												24.1167	0.050791					12.1425	-0.000129677			12.143	-0.00373
												24.1333	0.014887					12.1509	-0.000160011			12.1514	-0.00375
												24.15	-0.014968					12.1593	-0.000177867			12.1598	-0.00376
												24.1667	-0.036402					12.1677	-0.000189642			12.1682	-0.00377
												24.1833	-0.047307					12.1762	-0.000195062			12.1766	-0.00377
												24.2	-0.046111					12.1846	-0.000188896			12.185	-0.00377
												24.2167	-0.041529					12.193	-0.000167587			12.1935	-0.00378
												24.2333	-0.036098					12.2014	-0.000136563			12.2019	-0.00379
												24.25	-0.029298					12.2098	-0.000105366			12.2103	-0.0038
												24.2667	-0.024378					12.2182	-7.88777e-05			12.2187	-0.00381
												24.2833	-0.021227					12.2267	-5.37195e-05			12.2271	-0.00382
												24.3	-0.017297					12.2351	-2.11053e-05			12.2355	-0.00383
												24.3167	-0.015209					12.2435	1.83965e-05			12.244	-0.00384
												24.3333	-0.014114					12.2519	5.20896e-05			12.2524	-0.00385
												24.35	-0.012798					12.2603	6.69539e-05			12.2608	-0.00387
												24.3667	-0.011353					12.2688	5.08889e-05			12.2692	-0.00389
												24.3833	-0.008877					12.2772	1.83443e-06			12.2776	-0.00392
												24.4	-0.006702					12.2856	-6.80805e-05			12.286	-0.00394
												24.4167	-0.004759					12.294	-0.00015141			12.2945	-0.00395
												24.4333	-0.003198					12.3024	-0.000245497			12.3029	-0.00394
												24.45	-0.001926					12.3108	-0.000341497			12.3113	-0.00394
												24.4667	-0.001055					12.3193	-0.000428293			12.3197	-0.00394
												24.4833	-0.000764					12.3277	-0.000500407			12.3281	-0.00394
												24.5	-0.001143					12.3361	-0.00055825			12.3366	-0.00392
												24.5167	-0.001725					12.3445	-0.000600752			12.345	-0.00387
												24.5333	-0.002058					12.3529	-0.000625965			12.3534	-0.00379
												24.55	-0.002081					12.3613	-0.000638128			12.3618	-0.00371
												24.5667	-0.002174					12.3698	-0.000645111			12.3702	-0.00365
												24.5833	-0.001917					12.3782	-0.000652662			12.3786	-0.00364
												24.6	-0.001451					12.3866	-0.000664323			12.3871	-0.00365
												24.6167	-0.001156					12.395	-0.00067746			12.3955	-0.00367
												24.6333	-0.000993					12.4034	-0.000681112			12.4039	-0.00369
												24.65	-0.001					12.4118	-0.000670053			12.4123	-0.00369
												24.6667	-0.001107					12.4203	-0.000648986			12.4207	-0.00368
												24.6833	-0.001304					12.4287	-0.000618707			12.4291	-0.00366
												24.7	-0.001731					12.4371	-0.000573476			12.4376	-0.00362
												24.7167	-0.00187					12.4455	-0.000515281			12.446	-0.0035
												24.7333	-0.001821					12.4539	-0.000457377			12.4544	-0.00329
												24.75	-0.001791					12.4624	-0.000408681			12.4628	-0.00305
												24.7667	-0.001762					12.4708	-0.000370926			12.4712	-0.00285
												24.7833	-0.001563					12.4792	-0.000343837			12.4796	-0.00275
												24.8	-0.001243					12.4876	-0.000328275			12.4881	-0.00266
												24.8167	-0.001285					12.496	-0.000327402			12.4965	-0.00252
												24.8333	-0.001389					12.5044	-0.000343607			12.5049	-0.00238
												24.85	-0.001042					12.5129	-0.00037199			12.5133	-0.00228
												24.8667	-0.000536					12.5213	-0.00039317			12.5217	-0.00216
												24.8833	0.000101					12.5297	-0.000384136			12.5302	-0.00195
												24.9	0.000577					12.5381	-0.000345137			12.5386	-0.00165
												24.9167	0.000563					12.5465	-0.000295266			12.547	-0.00135
												24.9333	0.000299					12.5549	-0.000249483			12.5554	-0.00107
												24.95	8.5e-05					12.5633	-0.000213759			12.5638	-0.000830574
												24.9667	-0.000119					12.5718	-0.000184932			12.5722	-0.000624553
												24.9833	-4.4e-05					12.5802	-0.00015176			12.5807	-0.00044804
												25	0.000572					12.5886	-0.000108039			12.5891	-0.000291619
												25.0167	0.001658					12.597	-5.49086e-05			12.5975	-0.000143116
												25.0333	0.002035					12.6054	7.37195e-06			12.6059	1.32838e-05
												25.05	0.001972					12.6139	7.51035e-05			12.6143	0.000179785
												25.0667	0.001869					12.6223	0.000137047			12.6227	0.000336068
												25.0833	0.001766					12.6307	0.00018559			12.6311	0.000466019
												25.1	0.001572					12.6391	0.000220139			12.6396	0.000566736
												25.1167	0.00145					12.6475	0.000243579			12.648	0.000645067
												25.1333	0.002199					12.6559	0.000258086			12.6564	0.000719039
												25.15	0.002467					12.6644	0.000263485			12.6648	0.000801253
												25.1667	0.002056					12.6728	0.00025973			12.6732	0.000884709
												25.1833	0.001324					12.6812	0.000253471			12.6817	0.000958845
												25.2	0.000323					12.6896	0.000257767			12.6901	0.00102
												25.2167	-8.9e-05					12.698	0.000275945			12.6985	0.00106
												25.2333	-0.00045					12.7065	0.000296408			12.7069	0.00109
												25.25	-0.000842					12.7149	0.000307303			12.7153	0.00112
												25.2667	-0.001144					12.7233	0.000300496			12.7237	0.00117
												25.2833	-0.001325					12.7317	0.000277463			12.7322	0.00122
												25.3	-0.001437					12.7401	0.000250604			12.7406	0.00127
												25.3167	-0.00162					12.7485	0.000226912			12.749	0.00131
												25.3333	-0.002384					12.7569	0.000205102			12.7574	0.00136
												25.35	-0.003118					12.7654	0.000181143			12.7658	0.0014
												25.3667	-0.003043					12.7738	0.000150641			12.7743	0.00144
												25.3833	-0.002797					12.7822	0.000118038			12.7827	0.00148
												25.4	-0.002831					12.7906	9.57467e-05			12.7911	0.00151
												25.4167	-0.002987					12.799	8.61756e-05			12.7995	0.00154
												25.4333	-0.003223					12.8074	8.27868e-05			12.8079	0.00157
												25.45	-0.00306					12.8159	7.91864e-05			12.8163	0.00162
												25.4667	-0.002536					12.8243	7.04136e-05			12.8247	0.00168
												25.4833	-0.002083					12.8327	5.342e-05			12.8332	0.00173
												25.5	-0.00175					12.8411	2.8854e-05			12.8416	0.00178
												25.5167	-0.001655					12.8495	1.57094e-06			12.85	0.00182
												25.5333	-0.00173					12.858	-2.31843e-05			12.8584	0.00185
												25.55	-0.001775					12.8664	-4.26195e-05			12.8668	0.00188
												25.5667	-0.00161					12.8748	-5.76851e-05			12.8752	0.00191
												25.5833	-0.001155					12.8832	-6.8801e-05			12.8837	0.00194
												25.6	-0.00038					12.8916	-7.06162e-05			12.8921	0.00196
												25.6167	0.000459					12.9	-5.98264e-05			12.9005	0.00198
												25.6333	0.001292					12.9085	-4.36889e-05			12.9089	0.00198
												25.65	0.001775					12.9169	-2.98035e-05			12.9173	0.00198
												25.6667	0.001789					12.9253	-2.1144e-05			12.9258	0.00198
												25.6833	0.001872					12.9337	-1.93003e-05			12.9342	0.00198
												25.7	0.001575					12.9421	-2.45776e-05			12.9426	0.00196
												25.7167	0.001276					12.9505	-3.00589e-05			12.951	0.00193
												25.7333	0.001175					12.959	-2.24161e-05			12.9594	0.00191
												25.75	0.001463					12.9674	1.93859e-06			12.9678	0.00189
												25.7667	0.001712					12.9758	3.14747e-05			12.9763	0.00187
												25.7833	0.00143					12.9842	5.12308e-05			12.9847	0.00185
												25.8	0.001249					12.9926	5.24741e-05			12.9931	0.00183
												25.8167	0.001497					13.001	3.48938e-05			13.0015	0.00181
												25.8333	0.002035					13.0095	6.35532e-06			13.0099	0.00179
												25.85	0.002603					13.0179	-2.5143e-05			13.0183	0.00176
												25.8667	0.003152					13.0263	-5.49023e-05			13.0268	0.00176
												25.8833	0.00348					13.0347	-7.90812e-05			13.0352	0.00177
												25.9	0.003128					13.0431	-9.31298e-05			13.0436	0.00179
												25.9167	0.002877					13.0516	-9.40735e-05			13.052	0.00181
												25.9333	0.003137					13.06	-8.51034e-05			13.0604	0.00181
												25.95	0.004217					13.0684	-7.22739e-05			13.0688	0.00181
												25.9667	0.005957					13.0768	-6.14705e-05			13.0773	0.0018
												25.9833	0.006587					13.0852	-5.83988e-05			13.0857	0.0018
												26	0.007247					13.0936	-6.56218e-05			13.0941	0.00179
												26.0167	0.004136					13.1021	-7.62987e-05			13.1025	0.00177
												26.0333	0.002806					13.1105	-7.91767e-05			13.1109	0.00175
												26.05	0.002465					13.1189	-7.53124e-05			13.1194	0.00173
												26.0667	-9.5e-05					13.1273	-7.20034e-05			13.1278	0.00172
												26.0833	-0.002635					13.1357	-7.04433e-05			13.1362	0.00171
												26.1	-0.014576					13.1441	-6.88237e-05			13.1446	0.0017
												26.1167	-0.035379					13.1526	-6.76488e-05			13.153	0.00167
												26.1333	-0.064994					13.161	-6.70032e-05			13.1614	0.00164
												26.15	-0.093469					13.1694	-6.62487e-05			13.1699	0.0016
												26.1667	-0.103463					13.1778	-6.5951e-05			13.1783	0.00156
												26.1833	-0.101488					13.1862	-6.3571e-05			13.1867	0.00152
												26.2	-0.094093					13.1946	-4.42796e-05			13.1951	0.00148
												26.2167	-0.087642					13.2031	3.83965e-06			13.2035	0.00145
												26.2333	-0.080706					13.2115	6.77419e-05			13.2119	0.00142
												26.25	-0.072719					13.2199	0.000130832			13.2204	0.00141
												26.2667	-0.066052					13.2283	0.000186972			13.2288	0.00141
												26.2833	-0.060495					13.2367	0.000235305			13.2372	0.00141
												26.3	-0.053508					13.2452	0.000275506			13.2456	0.00142
												26.3167	-0.046908					13.2536	0.000307014			13.254	0.00143
												26.3333	-0.043374					13.262	0.000330664			13.2624	0.00144
												26.35	-0.040549					13.2704	0.000348062			13.2709	0.00145
												26.3667	-0.037645					13.2788	0.000359614			13.2793	0.00148
												26.3833	-0.03479					13.2872	0.000365189			13.2877	0.00152
												26.4	-0.031806					13.2957	0.000365438			13.2961	0.00156
												26.4167	-0.02844					13.3041	0.000361699			13.3045	0.00159
												26.4333	-0.025322					13.3125	0.000358493			13.313	0.00159
												26.45	-0.022384					13.3209	0.000361386			13.3214	0.00157
												26.4667	-0.019535					13.3293	0.000369512			13.3298	0.00156
												26.4833	-0.017137					13.3377	0.000378195			13.3382	0.00156
												26.5	-0.015569					13.3462	0.000382266			13.3466	0.00157
												26.5167	-0.014461					13.3546	0.000372672			13.355	0.00159
												26.5333	-0.013484					13.363	0.000343575			13.3635	0.0016
												26.55	-0.012406					13.3714	0.000307708			13.3719	0.0016
												26.5667	-0.011458					13.3798	0.000282545			13.3803	0.00158
												26.5833	-0.01068					13.3882	0.000269001			13.3887	0.00155
												26.6	-0.009653					13.3967	0.000261192			13.3971	0.00155
												26.6167	-0.008607					13.4051	0.000258532			13.4055	0.00159
												26.6333	-0.007644					13.4135	0.000264391			13.414	0.00163
												26.65	-0.00683					13.4219	0.000281579			13.4224	0.00167
												26.6667	-0.005747					13.4303	0.000308007			13.4308	0.0017
												26.6833	-0.004573					13.4388	0.00033611			13.4392	0.00171
												26.7	-0.00374					13.4472	0.000360077			13.4476	0.00172
												26.7167	-0.00335					13.4556	0.000377525			13.456	0.00172
												26.7333	-0.003375					13.464	0.000387555			13.4645	0.00173
												26.75	-0.00356					13.4724	0.000390848			13.4729	0.00175
												26.7667	-0.003635					13.4808	0.000390853			13.4813	0.00177
												26.7833	-0.00375					13.4893	0.000391182			13.4897	0.00179
												26.8	-0.004025					13.4977	0.000392348			13.4981	0.0018
												26.8167	-0.004315					13.5061	0.000393532			13.5066	0.00181
												26.8333	-0.004182					13.5145	0.000395209			13.515	0.0018
												26.85	-0.00412					13.5229	0.000400337			13.5234	0.00178
												26.8667	-0.004057					13.5313	0.00041095			13.5318	0.00173
												26.8833	-0.003014					13.5398	0.000423616			13.5402	0.00166
												26.9	-0.001092					13.5482	0.000432064			13.5486	0.00158
												26.9167	0.000154					13.5566	0.000430967			13.5571	0.00152
												26.9333	0.000791					13.565	0.00041856			13.5655	0.00147
												26.95	0.001027					13.5734	0.000396068			13.5739	0.00143
												26.9667	0.000973					13.5818	0.000365792			13.5823	0.00138
												26.9833	0.00087					13.5903	0.000329312			13.5907	0.00133
												27	-0.000124					13.5987	0.000288614			13.5991	0.00126
												27.0167	-0.000966					13.6071	0.000248721			13.6076	0.00117
												27.0333	-0.00246					13.6155	0.000216563			13.616	0.0011
												27.05	-0.002884					13.6239	0.000195426			13.6244	0.00108
												27.0667	-0.002778					13.6324	0.000183682			13.6328	0.00109
												27.0833	-0.001913					13.6408	0.000180573			13.6412	0.00112
												27.1	-0.001807					13.6492	0.000184712			13.6496	0.00114
												27.1167	-0.002071					13.6576	0.000188225			13.6581	0.00116
												27.1333	-0.001918					13.666	0.00018247			13.6665	0.00117
												27.15	-0.001746					13.6744	0.000168626			13.6749	0.00116
												27.1667	-0.001664					13.6829	0.000154742			13.6833	0.00113
												27.1833	-0.001741					13.6913	0.000146974			13.6917	0.00109
												27.2	-0.002379					13.6997	0.000145526			13.7002	0.00106
												27.2167	-0.002696					13.7081	0.000144917			13.7086	0.00104
												27.2333	-0.003237					13.7165	0.000139848			13.717	0.00106
												27.25	-0.003509					13.7249	0.000126571			13.7254	0.00109
												27.2667	-0.00343					13.7333	0.000101865			13.7338	0.00115
												27.2833	-0.003171					13.7418	6.55692e-05			13.7422	0.0012
												27.3	-0.003033					13.7502	2.29438e-05			13.7507	0.00126
												27.3167	-0.002732					13.7586	-2.02079e-05			13.7591	0.0013
												27.3333	-0.002293					13.767	-5.93189e-05			13.7675	0.00135
												27.35	-0.001585					13.7754	-8.81282e-05			13.7759	0.00139
												27.3667	-0.001146					13.7839	-0.000103719			13.7843	0.00143
												27.3833	-0.000827					13.7923	-0.000112655			13.7927	0.00147
												27.4	-0.000449					13.8007	-0.000123557			13.8011	0.00151
												27.4167	0.000175					13.8091	-0.000139538			13.8096	0.00153
												27.4333	0.0006					13.8175	-0.000153642			13.818	0.0016
												27.45	0.001016					13.8259	-0.000153653			13.8264	0.00182
												27.4667	0.001251					13.8344	-0.000136967			13.8348	0.00222
												27.4833	0.001366					13.8428	-0.000108303			13.8432	0.00271
												27.5	0.001142					13.8512	-7.27126e-05			13.8517	0.00321
												27.5167	0.001155					13.8596	-3.51415e-05			13.8601	0.00368
												27.5333	0.001455					13.868	1.30751e-06			13.8685	0.00411
												27.55	0.001364					13.8765	3.61829e-05			13.8769	0.00449
												27.5667	0.001194					13.8849	6.86372e-05			13.8853	0.00482
												27.5833	0.000903					13.8933	9.25944e-05			13.8937	0.0051
												27.6	0.000452					13.9017	9.27493e-05			13.9022	0.00534
												27.6167	6.2e-05					13.9101	5.81346e-05			13.9106	0.00555
												27.6333	-8.9e-05					13.9185	5.65967e-06			13.919	0.00573
												27.65	-0.000199					13.9269	-3.30507e-05			13.9274	0.00589
												27.6667	-0.00032					13.9354	-4.38382e-05			13.9358	0.00602
												27.6833	-0.000241					13.9438	-3.53093e-05			13.9443	0.00612
												27.7	3.8e-05					13.9522	-1.85657e-05			13.9527	0.00621
												27.7167	0.00024					13.9606	7.07816e-07			13.9611	0.00627
												27.7333	0.000294					13.969	1.9494e-05			13.9695	0.00631
												27.75	0.000198					13.9775	3.29437e-05			13.9779	0.00634
												27.7667	0.000462					13.9859	3.67991e-05			13.9863	0.00636
												27.7833	0.000787					13.9943	3.4796e-05			13.9947	0.00639
												27.8	0.000971					14.0027	3.42631e-05			14.0032	0.00641
												27.8167	0.001169					14.0111	3.72771e-05			14.0116	0.00642
												27.8333	0.001553					14.0195	4.31287e-05			14.02	0.00644
												27.85	0.001667					14.028	5.03247e-05			14.0284	0.00645
												27.8667	0.001441					14.0364	5.42442e-05			14.0368	0.00647
												27.8833	0.001365					14.0448	4.67287e-05			14.0453	0.00648
												27.9	0.001379					14.0532	2.75331e-05			14.0537	0.00648
												27.9167	0.001328					14.0616	8.45574e-06			14.0621	0.00649
												27.9333	0.001385					14.0701	-5.20149e-06			14.0705	0.00649
												27.95	0.001642					14.0785	-1.49914e-05			14.0789	0.0065
												27.9667	0.001919					14.0869	-2.19358e-05			14.0873	0.00651
												27.9833	0.002156					14.0953	-2.29099e-05			14.0958	0.00653
												28	0.002223					14.1037	-8.37432e-06			14.1042	0.00654
												28.0167	0.002496					14.1121	2.46139e-05			14.1126	0.00655
												28.0333	0.002777					14.1205	6.32631e-05			14.121	0.0066
												28.05	0.002648					14.129	9.61726e-05			14.1294	0.00678
												28.0667	0.00225					14.1374	0.000117753			14.1379	0.00715
												28.0833	0.001891					14.1458	0.000126765			14.1463	0.00768
												28.1	0.001513					14.1542	0.000126254			14.1547	0.00826
												28.1167	0.001178					14.1626	0.000116053			14.1631	0.0088
												28.1333	0.000922					14.171	9.43191e-05			14.1715	0.00927
												28.15	0.000706					14.1795	6.0553e-05			14.1799	0.00967
												28.1667	0.00036					14.1879	1.488e-05			14.1883	0.01002
												28.1833	-7e-06					14.1963	-3.58834e-05			14.1968	0.01032
												28.2	-0.000523					14.2047	-8.07262e-05			14.2052	0.01057
												28.2167	-0.001066					14.2131	-0.000114856			14.2136	0.01079
												28.2333	-0.001364					14.2216	-0.000136662			14.222	0.01103
												28.25	-0.001371					14.23	-0.000140859			14.2304	0.01139
												28.2667	-0.001329					14.2384	-0.000125017			14.2388	0.01201
												28.2833	-0.001226					14.2468	-9.75392e-05			14.2473	0.01288
												28.3	-0.001124					14.2552	-6.8313e-05			14.2557	0.01398
												28.3167	-0.00101					14.2636	-4.28e-05			14.2641	0.01535
												28.3333	-0.000812					14.2721	-2.46216e-05			14.2725	0.01712
												28.35	-0.000914					14.2805	-1.58863e-05			14.2809	0.0194
												28.3667	-0.001366					14.2889	-1.6063e-05			14.2894	0.02229
												28.3833	-0.001208					14.2973	-2.48213e-05			14.2978	0.02591
												28.4	-0.00132					14.3057	-4.51272e-05			14.3062	0.03039
												28.4167	-0.00166					14.3141	-8.03713e-05			14.3146	0.03587
												28.4333	-0.001358					14.3226	-0.000122483			14.323	0.04247
												28.45	-0.000236					14.331	-0.000157494			14.3314	0.05031
												28.4667	0.000846					14.3394	-0.000182052			14.3399	0.05951
												28.4833	0.000959					14.3478	-0.000198798			14.3483	0.0702
												28.5	-0.000449					14.3562	-0.000208179			14.3567	0.08244
												28.5167	-0.001856					14.3646	-0.000211525			14.3651	0.09622
												28.5333	0.0005					14.3731	-0.00021645			14.3735	0.1115
												28.55	0.002517					14.3815	-0.000235653			14.3819	0.12827
												28.5667	0.002973					14.3899	-0.000270265			14.3904	0.14656
												28.5833	0.001499					14.3983	-0.000302894			14.3988	0.16642
												28.6	-0.001185					14.4067	-0.000326013			14.4072	0.18784
												28.6167	-0.014627					14.4152	-0.000346458			14.4156	0.21079
												28.6333	-0.035257					14.4236	-0.000369574			14.424	0.23526
												28.65	-0.049227					14.432	-0.000393625			14.4324	0.26123
												28.6667	-0.052267					14.4404	-0.000414226			14.4409	0.28874
												28.6833	-0.049587					14.4488	-0.000431715			14.4493	0.31777
												28.7	-0.045657					14.4572	-0.000448794			14.4577	0.3483
												28.7167	-0.041805					14.4657	-0.000468326			14.4661	0.38024
												28.7333	-0.037581					14.4741	-0.000493284			14.4745	0.41348
												28.75	-0.034587					14.4825	-0.000525368			14.483	0.44794
												28.7667	-0.032303					14.4909	-0.000561807			14.4914	0.48344
												28.7833	-0.030679					14.4993	-0.000596062			14.4998	0.51972
												28.8	-0.029555					14.5077	-0.000625172			14.5082	0.55646
												28.8167	-0.02775					14.5162	-0.000649538			14.5166	0.59332
												28.8333	-0.025332					14.5246	-0.000669971			14.525	0.62993
												28.85	-0.022644					14.533	-0.000686789			14.5335	0.66592
												28.8667	-0.019956					14.5414	-0.000700579			14.5419	0.70094
												28.8833	-0.017838					14.5498	-0.000713127			14.5503	0.73471
												28.9	-0.01615					14.5582	-0.000725399			14.5587	0.76697
												28.9167	-0.014351					14.5667	-0.000734343			14.5671	0.79751
												28.9333	-0.01296					14.5751	-0.00073735			14.5755	0.82612
												28.95	-0.011898					14.5835	-0.000739924			14.584	0.85262
												28.9667	-0.010846					14.5919	-0.000749882			14.5924	0.87688
												28.9833	-0.010054					14.6003	-0.000767512			14.6008	0.89888
												29	-0.009732					14.6088	-0.000788536			14.6092	0.9186
												29.0167	-0.00947					14.6172	-0.00081163			14.6176	0.93597
												29.0333	-0.009314					14.6256	-0.00083549			14.626	0.95101
												29.05	-0.008828					14.634	-0.000850421			14.6345	0.96386
												29.0667	-0.008113					14.6424	-0.000846561			14.6429	0.97466
												29.0833	-0.007367					14.6508	-0.000829179			14.6513	0.98346
												29.1	-0.006392					14.6593	-0.000811219			14.6597	0.99029
												29.1167	-0.005485					14.6677	-0.000800099			14.6681	0.99527
												29.1333	-0.005026					14.6761	-0.00079238			14.6766	0.99848
												29.15	-0.004976					14.6845	-0.000780405			14.685	1
												29.1667	-0.004947					14.6929	-0.000761147			14.6934	0.99995
												29.1833	-0.004768					14.7013	-0.000732878			14.7018	0.99842
												29.2	-0.004828					14.7098	-0.000693544			14.7102	0.99554
												29.2167	-0.004658					14.7182	-0.000645154			14.7186	0.99145
												29.2333	-0.004395					14.7266	-0.000586878			14.7271	0.98626
												29.25	-0.004332					14.735	-0.000484223			14.7355	0.98003
												29.2667	-0.004249					14.7434	-0.000245719			14.7439	0.97282
												29.2833	-0.004155					14.7518	0.000187758			14.7523	0.96472
												29.3	-0.003982					14.7603	0.000757877			14.7607	0.95584
												29.3167	-0.003858					14.7687	0.00137			14.7691	0.94628
												29.3333	-0.003741					14.7771	0.00195			14.7776	0.93609
												29.35	-0.003555					14.7855	0.00245			14.786	0.92529
												29.3667	-0.002998					14.7939	0.00289			14.7944	0.91397
												29.3833	-0.002601					14.8024	0.00326			14.8028	0.90217
												29.4	-0.002604					14.8108	0.00358			14.8112	0.88996
												29.4167	-0.002617					14.8192	0.00387			14.8196	0.87741
												29.4333	-0.002476					14.8276	0.00412			14.8281	0.86459
												29.45	-0.002296					14.836	0.00433			14.8365	0.85154
												29.4667	-0.001815					14.8444	0.00449			14.8449	0.83826
												29.4833	-0.001245					14.8529	0.00462			14.8533	0.82478
												29.5	-0.000944					14.8613	0.00472			14.8617	0.81117
												29.5167	-0.000993					14.8697	0.0048			14.8702	0.79746
												29.5333	-0.000769					14.8781	0.00487			14.8786	0.78365
												29.55	-0.000535					14.8865	0.00493			14.887	0.76974
												29.5667	-0.000381					14.8949	0.00499			14.8954	0.75575
												29.5833	-0.000306					14.9034	0.00504			14.9038	0.74176
												29.6	-0.000102					14.9118	0.00509			14.9122	0.72782
												29.6167	0.000243					14.9202	0.00515			14.9207	0.71392
												29.6333	0.00055					14.9286	0.0052			14.9291	0.70008
												29.65	0.000748					14.937	0.00525			14.9375	0.68632
												29.6667	0.000786					14.9454	0.00529			14.9459	0.67265
												29.6833	0.000753					14.9539	0.00531			14.9543	0.65911
												29.7	0.000561					14.9623	0.00532			14.9627	0.64571
												29.7167	0.00042					14.9707	0.0053			14.9712	0.63245
												29.7333	0.000791					14.9791	0.00526			14.9796	0.61933
												29.75	0.001082					14.9875	0.00521			14.988	0.60637
												29.7667	0.000843					14.996	0.00517			14.9964	0.59351
												29.7833	0.000574					15.0044	0.00514			15.0048	0.58075
												29.8	0.000386					15.0128	0.00514			15.0132	0.56808
												29.8167	0.000428					15.0212	0.00515			15.0217	0.55556
												29.8333	0.000762					15.0296	0.00517			15.0301	0.54325
												29.85	0.001266					15.038	0.0052			15.0385	0.53114
												29.8667	0.00152					15.0465	0.00521			15.0469	0.51922
												29.8833	0.001584					15.0549	0.00522			15.0553	0.50747
												29.9	0.001579					15.0633	0.00523			15.0638	0.49593
												29.9167	0.001533					15.0717	0.00525			15.0722	0.48462
												29.9333	0.001788					15.0801	0.00529			15.0806	0.47353
												29.95	0.001844					15.0885	0.00533			15.089	0.46264
												29.9667	0.001589					15.0969	0.00537			15.0974	0.45196
												29.9833	0.001045					15.1054	0.00542			15.1058	0.44148
												30	0.00076					15.1138	0.00554			15.1143	0.4312
												30.0167	0.000655					15.1222	0.00583			15.1227	0.42112
												30.0333	0.000497					15.1306	0.00633			15.1311	0.41124
												30.05	0.00017					15.139	0.00693			15.1395	0.40155
												30.0667	-0.000657					15.1475	0.00753			15.1479	0.39206
												30.0833	-0.001504					15.1559	0.00807			15.1563	0.38276
												30.1	-0.001801					15.1643	0.00855			15.1647	0.37365
												30.1167	-0.00229					15.1727	0.00899			15.1732	0.36472
												30.1333	-0.002705					15.1811	0.0094			15.1816	0.35598
												30.15	-0.002559					15.1895	0.00988			15.19	0.34744
												30.1667	-0.002423					15.198	0.01049			15.1984	0.33909
												30.1833	-0.002267					15.2064	0.0112			15.2068	0.33091
												30.2	-0.002022					15.2148	0.01193			15.2153	0.3229
												30.2167	-0.001938					15.2232	0.01267			15.2237	0.31509
												30.2333	-0.001531					15.2316	0.01345			15.2321	0.30747
												30.25	-0.001035					15.2401	0.01433			15.2405	0.30005
												30.2667	-0.001098					15.2485	0.01532			15.2489	0.29281
												30.2833	-0.001382					15.2569	0.01642			15.2573	0.28575
												30.3	-0.001015					15.2653	0.01772			15.2658	0.27885
												30.3167	-0.00102					15.2737	0.0192			15.2742	0.27213
												30.3333	-0.000863					15.2821	0.02084			15.2826	0.2656
												30.35	-0.000825					15.2905	0.02267			15.291	0.25924
												30.3667	-0.000807					15.299	0.02473			15.2994	0.25303
												30.3833	-0.000579					15.3074	0.02707			15.3079	0.24696
												30.4	-0.000311					15.3158	0.02969			15.3163	0.24104
												30.4167	-5e-06					15.3242	0.03262			15.3247	0.23529
												30.4333	0.000716					15.3326	0.03587			15.3331	0.22968
												30.45	0.001396					15.341	0.03944			15.3415	0.22423
												30.4667	0.001827					15.3495	0.04333			15.3499	0.21891
												30.4833	0.002048					15.3579	0.04755			15.3583	0.21373
												30.5	0.001579					15.3663	0.05213			15.3668	0.2087
												30.5167	0.000799					15.3747	0.05711			15.3752	0.2038
												30.5333	0.000224					15.3831	0.0625			15.3836	0.19898
												30.55	7.9e-05					15.3916	0.06826			15.392	0.19426
												30.5667	-0.000245					15.4	0.07437			15.4004	0.18969
												30.5833	-0.00072					15.4084	0.0808			15.4089	0.18526
												30.6	-0.001075					15.4168	0.08757			15.4173	0.18097
												30.6167	-0.00121					15.4252	0.09469			15.4257	0.17678
												30.6333	-0.00086					15.4336	0.10217			15.4341	0.17269
												30.65	-0.000229					15.4421	0.11001			15.4425	0.16871
												30.6667	0.000381					15.4505	0.11814			15.4509	0.16486
												30.6833	0.001112					15.4589	0.12653			15.4594	0.16117
												30.7	0.001382					15.4673	0.13515			15.4678	0.15763
												30.7167	0.001572					15.4757	0.14398			15.4762	0.15422
												30.7333	0.001578					15.4841	0.153			15.4846	0.15093
												30.75	0.001735					15.4926	0.16217			15.493	0.14777
												30.7667	0.001361					15.501	0.1715			15.5015	0.14474
												30.7833	0.000917					15.5094	0.18098			15.5099	0.14187
												30.8	0.000234					15.5178	0.19058			15.5183	0.13913
												30.8167	-0.000371					15.5262	0.20023			15.5267	0.1365
												30.8333	-0.000369					15.5346	0.20991			15.5351	0.13397
												30.85	-7.7e-05					15.5431	0.21959			15.5435	0.13163
												30.8667	0.000185					15.5515	0.22923			15.5519	0.12944
												30.8833	1.7e-05					15.5599	0.23884			15.5604	0.12729
												30.9	0.000139					15.5683	0.24836			15.5688	0.1252
												30.9167	-0.000521					15.5767	0.25774			15.5772	0.12329
												30.9333	-0.003567					15.5852	0.26691			15.5856	0.12158
												30.95	-0.006102					15.5936	0.27586			15.594	0.12004
												30.9667	-0.007807					15.602	0.28452			15.6024	0.11861
												30.9833	-0.008963					15.6104	0.29285			15.6109	0.11719
												31	-0.008608					15.6188	0.30081			15.6193	0.11578
												31.0167	-0.007658					15.6272	0.30836			15.6277	0.11446
												31.0333	-0.00451					15.6357	0.31548			15.6361	0.1133
												31.05	0.000668					15.6441	0.32216			15.6445	0.1123
												31.0667	0.005986					15.6525	0.32837			15.653	0.11146
												31.0833	0.001224					15.6609	0.33407			15.6614	0.11074
												31.1	-0.001417					15.6693	0.33929			15.6698	0.11012
												31.1167	-0.005109					15.6777	0.34411			15.6782	0.10959
												31.1333	-0.017778					15.6862	0.34849			15.6866	0.10913
												31.15	-0.026317					15.6946	0.35238			15.695	0.10873
												31.1667	-0.028516					15.703	0.35573			15.7035	0.1084
												31.1833	-0.027324					15.7114	0.35856			15.7119	0.10811
												31.2	-0.025823					15.7198	0.3609			15.7203	0.10787
												31.2167	-0.024674					15.7282	0.36273			15.7287	0.10766
												31.2333	-0.023087					15.7367	0.36405			15.7371	0.10748
												31.25	-0.021609					15.7451	0.36494			15.7455	0.10737
												31.2667	-0.020652					15.7535	0.36541			15.754	0.10741
												31.2833	-0.021074					15.7619	0.36546			15.7624	0.10765
												31.3	-0.020817					15.7703	0.36511			15.7708	0.10804
												31.3167	-0.019755					15.7788	0.36439			15.7792	0.10849
												31.3333	-0.018441					15.7872	0.36329			15.7876	0.10892
												31.35	-0.016847					15.7956	0.36184			15.796	0.1093
												31.3667	-0.015253					15.804	0.36008			15.8045	0.10963
												31.3833	-0.013879					15.8124	0.35802			15.8129	0.10991
												31.4	-0.012705					15.8208	0.35561			15.8213	0.11014
												31.4167	-0.011665					15.8293	0.35288			15.8297	0.11031
												31.4333	-0.010611					15.8377	0.3499			15.8381	0.11037
												31.45	-0.009916					15.8461	0.34672			15.8466	0.11029
												31.4667	-0.009292					15.8545	0.34333			15.855	0.11003
												31.4833	-0.008728					15.8629	0.33971			15.8634	0.10959
												31.5	-0.008073					15.8713	0.33588			15.8718	0.1091
												31.5167	-0.007463					15.8798	0.33185			15.8802	0.10865
												31.5333	-0.006946					15.8882	0.32765			15.8886	0.10826
												31.55	-0.006239					15.8966	0.32328			15.8971	0.1079
												31.5667	-0.005423					15.905	0.31872			15.9055	0.10754
												31.5833	-0.004566					15.9134	0.31397			15.9139	0.1071
												31.6	-0.003859					15.9218	0.30908			15.9223	0.10653
												31.6167	-0.003053					15.9303	0.3041			15.9307	0.10581
												31.6333	-0.002246					15.9387	0.29903			15.9391	0.10504
												31.65	-0.0014					15.9471	0.2939			15.9476	0.10429
												31.6667	-0.000894					15.9555	0.28875			15.956	0.10353
												31.6833	-0.000498					15.9639	0.28359			15.9644	0.10266
												31.7	-9.1e-05					15.9724	0.27837			15.9728	0.10168
												31.7167	0.000102					15.9808	0.2731			15.9812	0.10069
												31.7333	-0.000133					15.9892	0.26778			15.9896	0.09967
												31.75	-0.000548					15.9976	0.26244			15.9981	0.09855
												31.7667	-0.001004					16.006	0.25709			16.0065	0.09735
												31.7833	-0.000919					16.0144	0.25172			16.0149	0.09614
												31.8	-0.000644					16.0228	0.24635			16.0233	0.09491
												31.8167	-0.000139					16.0313	0.24098			16.0317	0.09358
												31.8333	0.000447					16.0397	0.23565			16.0402	0.0922
												31.85	0.001072					16.0481	0.23035			16.0486	0.09082
												31.8667	0.001318					16.0565	0.22511			16.057	0.08944
												31.8833	0.001194					16.0649	0.21991			16.0654	0.08803
												31.9	0.00089					16.0734	0.21474			16.0738	0.08661
												31.9167	0.000736					16.0818	0.20963			16.0822	0.08515
												31.9333	0.000694					16.0902	0.20458			16.0907	0.08361
												31.95	0.000462					16.0986	0.19957			16.0991	0.08203
												31.9667	0.00011					16.107	0.19457			16.1075	0.08046
												31.9833	-0.000302					16.1154	0.18958			16.1159	0.07888
												32	-0.000234					16.1239	0.18464			16.1243	0.07728
												32.0167	2.4e-05					16.1323	0.17976			16.1327	0.07568
												32.0333	0.000145					16.1407	0.17497			16.1412	0.07405
												32.05	0.000225					16.1491	0.17025			16.1496	0.0724
												32.0667	0.000405					16.1575	0.16562			16.158	0.07079
												32.0833	0.000725					16.1659	0.16109			16.1664	0.06922
												32.1	0.001136					16.1744	0.15664			16.1748	0.06763
												32.1167	0.001236					16.1828	0.15227			16.1832	0.06605
												32.1333	0.001008					16.1912	0.14802			16.1917	0.06455
												32.15	0.000651					16.1996	0.14385			16.2001	0.06307
												32.1667	0.000233					16.208	0.13974			16.2085	0.06157
												32.1833	-0.000205					16.2164	0.13571			16.2169	0.0601
												32.2	-0.000263					16.2249	0.13177			16.2253	0.05868
												32.2167	-0.00011					16.2333	0.12793			16.2338	0.05726
												32.2333	-5.7e-05					16.2417	0.1242			16.2422	0.05579
												32.25	-0.000194					16.2501	0.12055			16.2506	0.05436
												32.2667	-0.000381					16.2585	0.11698			16.259	0.05303
												32.2833	-0.000517					16.267	0.11347			16.2674	0.05171
												32.3	-0.000374					16.2754	0.11003			16.2758	0.05033
												32.3167	-0.000211					16.2838	0.10668			16.2843	0.04891
												32.3333	-0.000348					16.2922	0.1034			16.2927	0.04759
												32.35	-0.000485					16.3006	0.10019			16.3011	0.04637
												32.3667	-0.000681					16.309	0.09707			16.3095	0.04515
												32.3833	-0.000788					16.3175	0.0941			16.3179	0.04383
												32.4	-0.000705					16.3259	0.09127			16.3263	0.0425
												32.4167	-0.000692					16.3343	0.08853			16.3348	0.04127
												32.4333	-0.000789					16.3427	0.08584			16.3432	0.04015
												32.45	-0.001017					16.3511	0.0832			16.3516	0.03911
												32.4667	-0.001014					16.3595	0.08067			16.36	0.03805
												32.4833	-0.000952					16.368	0.07824			16.3684	0.03691
												32.5	-0.000899					16.3764	0.07588			16.3768	0.03577
												32.5167	-0.000826					16.3848	0.07358			16.3853	0.03473
												32.5333	-0.000893					16.3932	0.07133			16.3937	0.03382
												32.55	-0.000881					16.4016	0.06915			16.4021	0.03301
												32.5667	-0.000648					16.41	0.06705			16.4105	0.03223
												32.5833	-0.000425					16.4185	0.06498			16.4189	0.03139
												32.6	-0.000262					16.4269	0.06297			16.4274	0.03044
												32.6167	2.1e-05					16.4353	0.06107			16.4358	0.02944
												32.6333	0.000276					16.4437	0.05921			16.4442	0.02849
												32.65	0.000251					16.4521	0.05737			16.4526	0.02764
												32.6667	3.5e-05					16.4606	0.05561			16.461	0.02689
												32.6833	-0.00021					16.469	0.05395			16.4694	0.02623
												32.7	-0.000275					16.4774	0.05233			16.4779	0.02562
												32.7167	-8e-05					16.4858	0.0507			16.4863	0.02504
												32.7333	-1.1e-05					16.4942	0.0491			16.4947	0.0244
												32.75	-9.2e-05					16.5026	0.04762			16.5031	0.02362
												32.7667	0.000107					16.5111	0.04627			16.5115	0.02275
												32.7833	0.000656					16.5195	0.04498			16.5199	0.02192
												32.8	0.001005					16.5279	0.04365			16.5283	0.02119
												32.8167	0.001024					16.5363	0.04236			16.5368	0.02056
												32.8333	0.001149					16.5447	0.04118			16.5452	0.02
												32.85	0.001414					16.5531	0.04013			16.5536	0.01952
												32.8667	0.001529					16.5616	0.03915			16.562	0.01912
												32.8833	0.001564					16.57	0.03812			16.5704	0.01878
												32.9	0.001379					16.5784	0.03697			16.5789	0.01852
												32.9167	0.001174					16.5868	0.03579			16.5873	0.01831
												32.9333	0.001176					16.5952	0.03468			16.5957	0.01811
												32.95	0.001158					16.6036	0.03372			16.6041	0.01786
												32.9667	0.000869					16.6121	0.03288			16.6125	0.01746
												32.9833	0.000491					16.6205	0.03214			16.6209	0.01685
												33	0.000213					16.6289	0.03147			16.6294	0.01612
												33.0167	0.000275					16.6373	0.03074			16.6378	0.01542
												33.0333	0.000533					16.6457	0.02984			16.6462	0.0148
												33.05	0.00049					16.6542	0.02884			16.6546	0.01426
												33.0667	0.000308					16.6626	0.02785			16.663	0.01379
												33.0833	0.000386					16.671	0.02697			16.6715	0.0134
												33.1	0.000533					16.6794	0.02619			16.6799	0.01308
												33.1167	0.000391					16.6878	0.02553			16.6883	0.01281
												33.1333	0.000163					16.6962	0.02495			16.6967	0.01257
												33.15	6.5e-05					16.7047	0.02446			16.7051	0.01236
												33.1667	-0.000123					16.7131	0.02403			16.7135	0.01217
												33.1833	-0.000531					16.7215	0.02362			16.7219	0.01199
												33.2	-0.00104					16.7299	0.02315			16.7304	0.01183
												33.2167	-0.001398					16.7383	0.02252			16.7388	0.01169
												33.2333	-0.001193					16.7467	0.02178			16.7472	0.01158
												33.25	-0.001009					16.7552	0.02106			16.7556	0.0115
												33.2667	-0.001085					16.7636	0.02041			16.764	0.01145
												33.2833	-0.000941					16.772	0.01983			16.7724	0.0114
												33.3	-0.000726					16.7804	0.01931			16.7809	0.01136
												33.3167	-0.000342					16.7888	0.01885			16.7893	0.0113
												33.3333	0.000124					16.7972	0.01846			16.7977	0.01115
												33.35	0.00023					16.8057	0.01812			16.8061	0.01082
												33.3667	0.000245					16.8141	0.01784			16.8145	0.01029
[truncated: 1,565 more rows]

## Sheet: Figure 5a-5c
Figure 5a-5c

## Sheet: Supplementary Figure2a-f
Supplementary Figure2a							Supplementary Figure2b							Supplementary Figure2c							Supplementary Figure2d							Supplementary Figure2e							Supplementary Figure2f
0	9.953	0	1.288	0	0.004		0	0.004	0	0	0	1.288		0	0.003	0	3.5	0	-0.001		0	1.998	0	-0.001	0	4.145		0	-0.004	0	0.002	0	-0.002		0	0	0	-0.002	0	0
0.03327	9.461	0.03294	-0.001	0.03335	0.007		0.03327	0.003	0.03327	0.016	0.03294	-0.001		0.03159	0.005	0.03327	3.516	0.0324	0.003		0.02939	1.998	0.03024	0.002	0.02995	0.028		0.03327	-0.063	0.03159	0.012	0.03327	0.022		0.03242	0	0.03241	-0.004	0.03242	0
0.06654	9.276	0.06589	0.005	0.0667	0.017		0.06654	0.007	0.06654	0.039	0.06589	0.005		0.06318	0.019	0.06654	3.575	0.0648	0.017		0.05878	1.888	0.06048	0.014	0.0599	0.122		0.06654	-0.161	0.06319	0.022	0.06655	0.055		0.06484	-0.001	0.06482	-0.008	0.06484	-0.001
0.0998	10.097	0.09883	0.045	0.10005	0.076		0.09981	0.147	0.09981	0.275	0.09883	0.045		0.09478	0.09	0.09981	3.827	0.09719	0.061		0.08817	1.888	0.09071	0.046	0.08984	0.934		0.09981	-0.248	0.09478	0.062	0.09982	0.237		0.09725	-0.004	0.09724	-0.012	0.09725	-0.005
0.13307	14.714	0.13177	0.348	0.13341	0.311		0.13308	0.808	0.13308	1.077	0.13177	0.348		0.12637	0.179	0.13308	3.96	0.12959	0.165		0.11756	2.405	0.12095	0.143	0.11979	3.329		0.13308	-0.225	0.12637	0.151	0.1331	0.514		0.12967	-0.007	0.12965	-0.018	0.12967	-0.006
0.16634	21.785	0.16472	1.267	0.16676	0.681		0.16636	1.875	0.16636	2.263	0.16472	1.267		0.15796	0.224	0.16636	3.892	0.16199	0.261		0.14695	2.405	0.15119	0.233	0.14974	6.267		0.16636	-0.292	0.15797	0.218	0.16637	0.657		0.16209	-0.008	0.16206	-0.019	0.16209	-0.009
0.19961	26.192	0.19766	2.454	0.20011	0.898		0.19963	2.627	0.19963	2.858	0.19766	2.454		0.18955	0.187	0.19963	3.539	0.19439	0.31		0.17634	5.459	0.18143	0.293	0.17969	7.265		0.19963	-0.475	0.18956	0.23	0.19964	0.533		0.19451	-0.008	0.19447	-0.021	0.19451	-0.007
0.23288	25.285	0.2306	2.813	0.23346	0.795		0.2329	2.604	0.2329	2.557	0.2306	2.813		0.22114	0.121	0.2329	3.235	0.22678	0.291		0.20573	5.459	0.21167	0.313	0.20964	5.704		0.2329	-0.777	0.22115	0.172	0.23292	0.273		0.22692	-0.008	0.22688	-0.022	0.22692	-0.007
0.26614	21.244	0.26355	2.058	0.26681	0.486		0.26617	2.089	0.26617	1.821	0.26355	2.058		0.25273	0.082	0.26617	2.957	0.25918	0.222		0.23512	6.277	0.2419	0.257	0.23959	3.563		0.26617	-1.02	0.25274	0.127	0.26619	0.123		0.25934	-0.009	0.25929	-0.023	0.25934	-0.004
0.29941	18.192	0.29649	1.216	0.30016	0.275		0.29944	1.602	0.29944	1.323	0.29649	1.216		0.28433	0.064	0.29944	2.675	0.29158	0.157		0.26451	6.277	0.27214	0.192	0.26953	2.348		0.29944	-1.231	0.28434	0.099	0.29946	0.026		0.29176	-0.01	0.29171	-0.024	0.29176	-0.007
0.33268	15.784	0.32944	0.732	0.33352	0.175		0.33271	1.258	0.33271	0.998	0.32944	0.732		0.31592	0.05	0.33271	2.363	0.32398	0.121		0.29389	5.342	0.30238	0.143	0.29948	1.682		0.33271	-1.42	0.31593	0.081	0.33274	-0.031		0.32418	-0.013	0.32412	-0.028	0.32418	-0.009
0.36595	13.623	0.36238	0.464	0.36687	0.113		0.36598	0.989	0.36598	0.765	0.36238	0.464		0.34751	0.044	0.36598	2.015	0.35638	0.097		0.32328	5.342	0.33262	0.114	0.32943	1.267		0.36598	-1.596	0.34752	0.072	0.36601	-0.072		0.3566	-0.015	0.35653	-0.03	0.3566	-0.01
0.39921	11.743	0.39532	0.285	0.40022	0.07		0.39925	0.781	0.39925	0.59	0.39532	0.285		0.3791	0.038	0.39925	1.642	0.38877	0.085		0.35267	4.358	0.36286	0.093	0.35938	0.977		0.39925	-1.75	0.37912	0.066	0.39929	-0.098		0.38901	-0.013	0.38894	-0.032	0.38901	-0.01
0.43248	10.054	0.42827	0.156	0.43357	0.046		0.43253	0.611	0.43253	0.465	0.42827	0.156		0.41069	0.035	0.43253	1.22	0.42117	0.072		0.38206	4.358	0.39309	0.083	0.38933	0.779		0.43253	-1.894	0.41071	0.061	0.43256	-0.121		0.42143	-0.013	0.42135	-0.035	0.42143	-0.009
0.46575	8.641	0.46121	0.056	0.46692	0.037		0.4658	0.484	0.4658	0.38	0.46121	0.056		0.44228	0.031	0.4658	0.785	0.45357	0.061		0.41145	3.538	0.42333	0.071	0.41927	0.652		0.4658	-2.013	0.4423	0.061	0.46583	-0.139		0.45385	-0.012	0.45376	-0.04	0.45385	-0.01
0.49902	7.42	0.49415	-0.016	0.50027	0.039		0.49907	0.384	0.49907	0.32	0.49415	-0.016		0.47388	0.03	0.49907	0.316	0.48597	0.054		0.44084	3.538	0.45357	0.061	0.44922	0.569		0.49907	-2.111	0.4739	0.06	0.49911	-0.153		0.48627	-0.013	0.48618	-0.043	0.48627	-0.009
0.53229	6.415	0.5271	-0.073	0.53363	0.051		0.53234	0.312	0.53234	0.273	0.5271	-0.073		0.50547	0.035	0.53234	-0.176	0.51837	0.046		0.47023	2.881	0.48381	0.054	0.47917	0.509		0.53234	-2.186	0.50549	0.059	0.53238	-0.166		0.51869	-0.015	0.51859	-0.046	0.51869	-0.012
0.56555	5.576	0.56004	-0.114	0.56698	0.072		0.56561	0.257	0.56561	0.228	0.56004	-0.114		0.53706	0.039	0.56561	-0.684	0.55076	0.046		0.49962	2.881	0.51405	0.046	0.50912	0.45		0.56561	-2.234	0.53708	0.053	0.56565	-0.178		0.5511	-0.018	0.551	-0.047	0.5511	-0.013
0.59882	4.9	0.59298	-0.144	0.60033	0.101		0.59888	0.214	0.59888	0.193	0.59298	-0.144		0.56865	0.042	0.59888	-1.202	0.58316	0.045		0.52901	2.324	0.54428	0.046	0.53907	0.404		0.59888	-2.256	0.56868	0.048	0.59893	-0.193		0.58352	-0.022	0.58341	-0.049	0.58352	-0.015
0.63209	4.314	0.62593	-0.167	0.63368	0.137		0.63215	0.173	0.63215	0.167	0.62593	-0.167		0.60024	0.037	0.63215	-1.724	0.61556	0.042		0.5584	2.324	0.57452	0.045	0.56902	0.366		0.63215	-2.25	0.60027	0.048	0.6322	-0.204		0.61594	-0.02	0.61582	-0.049	0.61594	-0.014
0.66536	3.86	0.65887	-0.183	0.66703	0.181		0.66542	0.141	0.66542	0.144	0.65887	-0.183		0.63183	0.034	0.66542	-2.23	0.64796	0.04		0.58779	1.819	0.60476	0.043	0.59896	0.335		0.66542	-2.226	0.63186	0.049	0.66548	-0.215		0.64836	-0.02	0.64824	-0.051	0.64836	-0.017
0.69863	3.476	0.69181	-0.205	0.70038	0.234		0.6987	0.116	0.6987	0.126	0.69181	-0.205		0.66343	0.033	0.6987	-2.737	0.68035	0.035		0.61718	1.819	0.635	0.04	0.62891	0.309		0.6987	-2.176	0.66345	0.049	0.69875	-0.226		0.68077	-0.02	0.68065	-0.054	0.68077	-0.017
0.73189	3.173	0.72476	-0.225	0.73374	0.284		0.73197	0.099	0.73197	0.11	0.72476	-0.225		0.69502	0.033	0.73197	-3.206	0.71275	0.039		0.64657	1.395	0.66524	0.037	0.65886	0.282		0.73197	-2.105	0.69505	0.042	0.73202	-0.238		0.71319	-0.022	0.71306	-0.054	0.71319	-0.017
0.76516	2.919	0.7577	-0.24	0.76709	0.342		0.76524	0.084	0.76524	0.093	0.7577	-0.24		0.72661	0.034	0.76524	-3.664	0.74515	0.039		0.67596	1.395	0.69547	0.037	0.68881	0.258		0.76524	-2.007	0.72664	0.04	0.7653	-0.248		0.74561	-0.023	0.74547	-0.056	0.74561	-0.019
0.79843	2.712	0.79064	-0.253	0.80044	0.4		0.79851	0.067	0.79851	0.082	0.79064	-0.253		0.7582	0.033	0.79851	-4.071	0.77755	0.04		0.70535	1.044	0.72571	0.039	0.71876	0.232		0.79851	-1.896	0.75823	0.036	0.79857	-0.257		0.77803	-0.025	0.77788	-0.056	0.77803	-0.021
0.8317	2.544	0.82359	-0.264	0.83379	0.465		0.83178	0.053	0.83178	0.076	0.82359	-0.264		0.78979	0.033	0.83178	-4.436	0.80995	0.034		0.73474	1.044	0.75595	0.039	0.7487	0.209		0.83178	-1.764	0.78983	0.037	0.83184	-0.267		0.81045	-0.024	0.81029	-0.058	0.81045	-0.019
0.86497	2.403	0.85653	-0.272	0.86714	0.529		0.86505	0.043	0.86505	0.071	0.85653	-0.272		0.82138	0.03	0.86505	-4.745	0.84234	0.029		0.76413	0.75	0.78619	0.039	0.77865	0.196		0.86505	-1.621	0.82142	0.035	0.86512	-0.28		0.84286	-0.021	0.84271	-0.059	0.84286	-0.021
0.89823	2.287	0.88947	-0.274	0.90049	0.592		0.89832	0.036	0.89832	0.063	0.88947	-0.274		0.85298	0.029	0.89832	-5.001	0.87474	0.03		0.79352	0.75	0.81643	0.033	0.8086	0.18		0.89832	-1.464	0.85301	0.031	0.89839	-0.292		0.87528	-0.018	0.87512	-0.058	0.87528	-0.021
0.9315	2.189	0.92242	-0.273	0.93385	0.664		0.93159	0.03	0.93159	0.058	0.92242	-0.273		0.88457	0.029	0.93159	-5.187	0.90714	0.031		0.82291	0.509	0.84666	0.028	0.83855	0.167		0.93159	-1.296	0.88461	0.03	0.93167	-0.299		0.9077	-0.02	0.90753	-0.057	0.9077	-0.022
0.96477	2.106	0.95536	-0.276	0.9672	0.738		0.96486	0.021	0.96486	0.055	0.95536	-0.276		0.91616	0.032	0.96486	-5.313	0.93954	0.035		0.85229	0.509	0.8769	0.03	0.8685	0.156		0.96486	-1.121	0.9162	0.028	0.96494	-0.307		0.94012	-0.022	0.93994	-0.056	0.94012	-0.021
0.99804	2.038	0.98831	-0.285	1.00055	0.804		0.99814	0.014	0.99814	0.052	0.98831	-0.285		0.94775	0.031	0.99814	-5.383	0.97193	0.041		0.88168	0.315	0.90714	0.031	0.89845	0.139		0.99814	-0.95	0.94779	0.028	0.99821	-0.313		0.97253	-0.024	0.97235	-0.056	0.97253	-0.021
1.0313	1.988	1.02125	-0.29	1.0339	0.872		1.03141	0.007	1.03141	0.046	1.02125	-0.29		0.97934	0.034	1.03141	-5.397	1.00433	0.039		0.91107	0.315	0.93738	0.035	0.92839	0.127		1.03141	-0.772	0.97939	0.027	1.03149	-0.322		1.00495	-0.024	1.00476	-0.055	1.00495	-0.021
1.06457	1.969	1.05419	-0.29	1.06725	0.938		1.06468	0.004	1.06468	0.04	1.05419	-0.29		1.01094	0.035	1.06468	-5.349	1.03673	0.038		0.94046	0.147	0.96761	0.042	0.95834	0.116		1.06468	-0.602	1.01098	0.024	1.06476	-0.329		1.03737	-0.025	1.03718	-0.059	1.03737	-0.021
1.09784	1.93	1.08714	-0.295	1.1006	1.01		1.09795	0	1.09795	0.036	1.08714	-0.295		1.04253	0.032	1.09795	-5.245	1.06913	0.033		0.96985	0.147	0.99785	0.039	0.98829	0.109		1.09795	-0.429	1.04257	0.025	1.09803	-0.34		1.06979	-0.024	1.06959	-0.062	1.06979	-0.019
1.13111	1.893	1.12008	-0.302	1.13396	1.075		1.13122	0	1.13122	0.037	1.12008	-0.302		1.07412	0.028	1.13122	-5.084	1.10153	0.031		0.99924	0.013	1.02809	0.04	1.01824	0.1		1.13122	-0.265	1.07416	0.026	1.13131	-0.347		1.10221	-0.023	1.102	-0.063	1.10221	-0.018
1.16438	1.841	1.15302	-0.31	1.16731	1.141		1.16449	-0.002	1.16449	0.032	1.15302	-0.31		1.10571	0.027	1.16449	-4.892	1.13392	0.031		1.02863	0.013	1.05833	0.034	1.04819	0.092		1.16449	-0.109	1.10576	0.026	1.16458	-0.357		1.13462	-0.027	1.13441	-0.068	1.13462	-0.018
1.19764	1.822	1.18597	-0.314	1.20066	1.203		1.19776	-0.004	1.19776	0.032	1.18597	-0.314		1.1373	0.025	1.19776	-4.661	1.16632	0.028		1.05802	-0.098	1.08857	0.03	1.07813	0.087		1.19776	0.04	1.13735	0.021	1.19786	-0.359		1.16704	-0.026	1.16682	-0.071	1.16704	-0.017
1.23091	1.805	1.21891	-0.31	1.23401	1.265		1.23103	-0.007	1.23103	0.029	1.21891	-0.31		1.16889	0.025	1.23103	-4.411	1.19872	0.027		1.08741	-0.098	1.1188	0.031	1.10808	0.085		1.23103	0.185	1.16894	0.019	1.23113	-0.364		1.19946	-0.027	1.19924	-0.071	1.19946	-0.015
1.26418	1.79	1.25185	-0.313	1.26736	1.33		1.26431	-0.011	1.26431	0.032	1.25185	-0.313		1.20049	0.023	1.26431	-4.128	1.23112	0.026		1.1168	-0.196	1.14904	0.03	1.13803	0.082		1.26431	0.309	1.20054	0.016	1.2644	-0.368		1.23188	-0.029	1.23165	-0.074	1.23188	-0.015
1.29745	1.776	1.2848	-0.32	1.30071	1.387		1.29758	-0.013	1.29758	0.027	1.2848	-0.32		1.23208	0.022	1.29758	-3.829	1.26351	0.023		1.14619	-0.196	1.17928	0.027	1.16798	0.077		1.29758	0.425	1.23213	0.018	1.29768	-0.373		1.26429	-0.026	1.26406	-0.074	1.26429	-0.018
1.33072	1.767	1.31774	-0.327	1.33407	1.443		1.33085	-0.015	1.33085	0.027	1.31774	-0.327		1.26367	0.02	1.33085	-3.529	1.29591	0.022		1.17558	-0.269	1.20952	0.028	1.19793	0.073		1.33085	0.531	1.26372	0.026	1.33095	-0.372		1.29671	-0.028	1.29647	-0.074	1.29671	-0.019
1.36398	1.759	1.35068	-0.329	1.36742	1.495		1.36412	-0.019	1.36412	0.024	1.35068	-0.329		1.29526	0.023	1.36412	-3.232	1.32831	0.021		1.20497	-0.269	1.23976	0.026	1.22788	0.068		1.36412	0.633	1.29532	0.031	1.36422	-0.378		1.32913	-0.026	1.32888	-0.075	1.32913	-0.02
1.39725	1.746	1.38363	-0.329	1.40077	1.551		1.39739	-0.017	1.39739	0.025	1.38363	-0.329		1.32685	0.028	1.39739	-2.931	1.36071	0.023		1.23436	-0.332	1.26999	0.021	1.25782	0.067		1.39739	0.723	1.32691	0.031	1.3975	-0.383		1.36155	-0.026	1.36129	-0.074	1.36155	-0.018
1.43052	1.737	1.41657	-0.333	1.43412	1.602		1.43066	-0.016	1.43066	0.024	1.41657	-0.333		1.35844	0.032	1.43066	-2.65	1.39311	0.025		1.26375	-0.332	1.30023	0.023	1.28777	0.063		1.43066	0.801	1.3585	0.026	1.43077	-0.39		1.39397	-0.029	1.39371	-0.074	1.39397	-0.014
1.46379	1.727	1.44951	-0.341	1.46747	1.652		1.46393	-0.016	1.46393	0.022	1.44951	-0.341		1.39004	0.027	1.46393	-2.367	1.4255	0.025		1.29314	-0.392	1.33047	0.021	1.31772	0.059		1.46393	0.873	1.39009	0.024	1.46405	-0.389		1.42638	-0.028	1.42612	-0.072	1.42638	-0.011
1.49705	1.72	1.48246	-0.347	1.50082	1.694		1.4972	-0.018	1.4972	0.022	1.48246	-0.347		1.42163	0.025	1.4972	-2.117	1.4579	0.023		1.32253	-0.392	1.36071	0.023	1.34767	0.053		1.4972	0.936	1.42169	0.023	1.49732	-0.388		1.4588	-0.026	1.45853	-0.073	1.4588	-0.011
1.53032	1.71	1.5154	-0.345	1.53418	1.734		1.53047	-0.016	1.53047	0.021	1.5154	-0.345		1.45322	0.023	1.53047	-1.869	1.4903	0.025		1.35192	-0.436	1.39095	0.024	1.37762	0.047		1.53047	0.991	1.45328	0.024	1.53059	-0.391		1.49122	-0.027	1.49094	-0.075	1.49122	-0.013
1.56359	1.706	1.54834	-0.347	1.56753	1.772		1.56375	-0.016	1.56375	0.023	1.54834	-0.347		1.48481	0.031	1.56375	-1.647	1.5227	0.026		1.38131	-0.436	1.42118	0.025	1.40756	0.045		1.56375	1.038	1.48487	0.028	1.56387	-0.398		1.52364	-0.026	1.52335	-0.076	1.52364	-0.014
1.59686	1.697	1.58129	-0.356	1.60088	1.806		1.59702	-0.014	1.59702	0.023	1.58129	-0.356		1.5164	0.038	1.59702	-1.441	1.5551	0.025		1.4107	-0.472	1.45142	0.025	1.43751	0.044		1.59702	1.077	1.51647	0.03	1.59714	-0.4		1.55606	-0.026	1.55576	-0.077	1.55606	-0.014
1.63013	1.691	1.61423	-0.359	1.63423	1.842		1.63029	-0.013	1.63029	0.026	1.61423	-0.359		1.54799	0.043	1.63029	-1.264	1.58749	0.024		1.44008	-0.472	1.48166	0.024	1.46746	0.04		1.63029	1.11	1.54806	0.028	1.63041	-0.404		1.58847	-0.024	1.58818	-0.077	1.58847	-0.013
1.66339	1.687	1.64718	-0.366	1.66758	1.879		1.66356	-0.015	1.66356	0.027	1.64718	-0.366		1.57959	0.046	1.66356	-1.101	1.61989	0.022		1.46947	-0.498	1.5119	0.027	1.49741	0.035		1.66356	1.14	1.57965	0.023	1.66369	-0.407		1.62089	-0.023	1.62059	-0.075	1.62089	-0.012
1.69666	1.681	1.68012	-0.368	1.70093	1.914		1.69683	-0.011	1.69683	0.023	1.68012	-0.368		1.61118	0.045	1.69683	-0.961	1.65229	0.021		1.49886	-0.498	1.54214	0.026	1.52736	0.03		1.69683	1.165	1.61125	0.025	1.69696	-0.402		1.65331	-0.022	1.653	-0.074	1.65331	-0.012
1.72993	1.675	1.71306	-0.369	1.73429	1.947		1.7301	-0.013	1.7301	0.019	1.71306	-0.369		1.64277	0.043	1.7301	-0.833	1.68469	0.02		1.52825	-0.534	1.57237	0.023	1.55731	0.029		1.7301	1.187	1.64284	0.029	1.73024	-0.396		1.68573	-0.023	1.68541	-0.074	1.68573	-0.014
1.7632	1.668	1.74601	-0.365	1.76764	1.974		1.76337	-0.007	1.76337	0.016	1.74601	-0.365		1.67436	0.042	1.76337	-0.728	1.71708	0.023		1.55764	-0.534	1.60261	0.023	1.58725	0.03		1.76337	1.203	1.67443	0.031	1.76351	-0.404		1.71814	-0.024	1.71782	-0.078	1.71814	-0.015
1.79647	1.662	1.77895	-0.365	1.80099	2		1.79664	-0.006	1.79664	0.014	1.77895	-0.365		1.70595	0.04	1.79664	-0.641	1.74948	0.024		1.58703	-0.564	1.63285	0.022	1.6172	0.024		1.79664	1.219	1.70603	0.028	1.79678	-0.413		1.75056	-0.026	1.75024	-0.079	1.75056	-0.016
1.82973	1.655	1.81189	-0.363	1.83434	2.018		1.82992	-0.005	1.82992	0.016	1.81189	-0.363		1.73754	0.042	1.82992	-0.568	1.78188	0.027		1.61642	-0.564	1.66309	0.02	1.64715	0.024		1.82992	1.233	1.73762	0.026	1.83006	-0.42		1.78298	-0.024	1.78265	-0.078	1.78298	-0.014
1.863	1.65	1.84484	-0.366	1.86769	2.041		1.86319	-0.007	1.86319	0.014	1.84484	-0.366		1.76914	0.043	1.86319	-0.507	1.81428	0.025		1.64581	-0.587	1.69333	0.02	1.6771	0.024		1.86319	1.243	1.76921	0.025	1.86333	-0.424		1.8154	-0.025	1.81506	-0.079	1.8154	-0.012
1.89627	1.646	1.87778	-0.362	1.90104	2.058		1.89646	-0.008	1.89646	0.015	1.87778	-0.362		1.80073	0.044	1.89646	-0.452	1.84668	0.023		1.6752	-0.587	1.72356	0.023	1.70705	0.027		1.89646	1.255	1.8008	0.028	1.8966	-0.428		1.84782	-0.027	1.84747	-0.077	1.84782	-0.012
1.92954	1.647	1.91072	-0.362	1.9344	2.07		1.92973	-0.002	1.92973	0.013	1.91072	-0.362		1.83232	0.043	1.92973	-0.408	1.87907	0.023		1.70459	-0.612	1.7538	0.024	1.73699	0.023		1.92973	1.263	1.8324	0.029	1.92988	-0.432		1.88023	-0.029	1.87988	-0.076	1.88023	-0.012
1.96281	1.643	1.94367	-0.365	1.96775	2.079		1.963	0	1.963	0.014	1.94367	-0.365		1.86391	0.043	1.963	-0.371	1.91147	0.021		1.73398	-0.612	1.78404	0.027	1.76694	0.016		1.963	1.269	1.86399	0.029	1.96315	-0.429		1.91265	-0.028	1.91229	-0.076	1.91265	-0.013
1.99607	1.645	1.97661	-0.369	2.0011	2.082		1.99627	0.005	1.99627	0.017	1.97661	-0.369		1.8955	0.047	1.99627	-0.344	1.94387	0.023		1.76337	-0.63	1.81428	0.025	1.79689	0.007		1.99627	1.27	1.89558	0.03	1.99643	-0.43		1.94507	-0.029	1.94471	-0.078	1.94507	-0.015
2.02934	1.643	2.00955	-0.378	2.03445	2.092		2.02954	0.009	2.02954	0.021	2.00955	-0.378		1.9271	0.048	2.02954	-0.319	1.97627	0.026		1.79276	-0.63	1.84452	0.023	1.82684	0		2.02954	1.273	1.92718	0.027	2.0297	-0.433		1.97749	-0.03	1.97712	-0.079	1.97749	-0.016
2.06261	1.638	2.0425	-0.385	2.0678	2.097		2.06281	0.014	2.06281	0.017	2.0425	-0.385		1.95869	0.044	2.06281	-0.298	2.00866	0.027		1.82215	-0.628	1.87475	0.023	1.85679	-0.002		2.06281	1.273	1.95877	0.028	2.06297	-0.435		2.0099	-0.03	2.00953	-0.08	2.0099	-0.013
2.09588	1.627	2.07544	-0.389	2.10115	2.101		2.09609	0.019	2.09609	0.014	2.07544	-0.389		1.99028	0.038	2.09609	-0.283	2.04106	0.032		1.85154	-0.628	1.90499	0.022	1.88674	-0.001		2.09609	1.28	1.99036	0.03	2.09625	-0.44		2.04232	-0.03	2.04194	-0.081	2.04232	-0.011
2.12914	1.616	2.10838	-0.393	2.13451	2.101		2.12936	0.021	2.12936	0.014	2.10838	-0.393		2.02187	0.041	2.12936	-0.271	2.07346	0.029		1.88093	-0.639	1.93523	0.023	1.91668	-0.004		2.12936	1.287	2.02196	0.035	2.12952	-0.44		2.07474	-0.03	2.07435	-0.079	2.07474	-0.009
2.16241	1.612	2.14133	-0.393	2.16786	2.097		2.16263	0.019	2.16263	0.023	2.14133	-0.393		2.05346	0.044	2.16263	-0.258	2.10586	0.025		1.91032	-0.639	1.96547	0.024	1.94663	-0.005		2.16263	1.29	2.05355	0.034	2.16279	-0.442		2.10716	-0.03	2.10677	-0.079	2.10716	-0.006
2.19568	1.625	2.17427	-0.404	2.20121	2.089		2.1959	0.021	2.1959	0.023	2.17427	-0.404		2.08505	0.048	2.1959	-0.25	2.13826	0.021		1.93971	-0.672	1.99571	0.026	1.97658	-0.013		2.1959	1.288	2.08514	0.035	2.19607	-0.447		2.13958	-0.027	2.13918	-0.079	2.13958	-0.006
2.22895	1.623	2.20721	-0.41	2.23456	2.077		2.22917	0.02	2.22917	0.026	2.20721	-0.41		2.11665	0.045	2.22917	-0.241	2.17065	0.022		1.9691	-0.672	2.02594	0.029	2.00653	-0.014		2.22917	1.291	2.11674	0.039	2.22934	-0.451		2.17199	-0.026	2.17159	-0.082	2.17199	-0.004
2.26222	1.616	2.24016	-0.413	2.26791	2.07		2.26244	0.029	2.26244	0.024	2.24016	-0.413		2.14824	0.044	2.26244	-0.238	2.20305	0.025		1.99848	-0.672	2.05618	0.031	2.03648	-0.016		2.26244	1.298	2.14833	0.041	2.26262	-0.455		2.20441	-0.024	2.204	-0.082	2.20441	-0.003
2.29548	1.59	2.2731	-0.415	2.30126	2.057		2.29571	0.034	2.29571	0.026	2.2731	-0.415		2.17983	0.041	2.29571	-0.23	2.23545	0.026		2.02787	-0.672	2.08642	0.027	2.06642	-0.019		2.29571	1.303	2.17992	0.043	2.29589	-0.458		2.23683	-0.021	2.23641	-0.084	2.23683	-0.004
2.32875	1.581	2.30605	-0.424	2.33462	2.041		2.32898	0.037	2.32898	0.024	2.30605	-0.424		2.21142	0.039	2.32898	-0.229	2.26785	0.027		2.05726	-0.682	2.11666	0.025	2.09637	-0.022		2.32898	1.303	2.21151	0.044	2.32916	-0.457		2.26925	-0.018	2.26882	-0.084	2.26925	-0.004
2.36202	1.57	2.33899	-0.43	2.36797	2.028		2.36225	0.035	2.36225	0.023	2.33899	-0.43		2.24301	0.034	2.36225	-0.229	2.30025	0.026		2.08665	-0.682	2.1469	0.022	2.12632	-0.025		2.36225	1.308	2.24311	0.048	2.36244	-0.461		2.30166	-0.016	2.30124	-0.083	2.30166	-0.003
2.39529	1.568	2.37193	-0.431	2.40132	2.012		2.39553	0.038	2.39553	0.026	2.37193	-0.431		2.2746	0.037	2.39553	-0.228	2.33264	0.024		2.11604	-0.691	2.17713	0.023	2.15627	-0.027		2.39553	1.308	2.2747	0.048	2.39571	-0.463		2.33408	-0.017	2.33365	-0.083	2.33408	-0.001
2.42856	1.561	2.40488	-0.433	2.43467	1.993		2.4288	0.046	2.4288	0.029	2.40488	-0.433		2.3062	0.041	2.4288	-0.23	2.36504	0.022		2.14543	-0.691	2.20737	0.026	2.18622	-0.031		2.4288	1.313	2.30629	0.048	2.42898	-0.471		2.3665	-0.016	2.36606	-0.082	2.3665	-0.003
2.46182	1.559	2.43782	-0.442	2.46802	1.964		2.46207	0.048	2.46207	0.031	2.43782	-0.442		2.33779	0.046	2.46207	-0.226	2.39744	0.019		2.17482	-0.702	2.23761	0.026	2.21616	-0.033		2.46207	1.318	2.33789	0.05	2.46226	-0.469		2.39892	-0.019	2.39847	-0.082	2.39892	-0.001
2.49509	1.554	2.47076	-0.451	2.50137	1.937		2.49534	0.055	2.49534	0.028	2.47076	-0.451		2.36938	0.046	2.49534	-0.222	2.42984	0.019		2.20421	-0.702	2.26785	0.027	2.24611	-0.029		2.49534	1.326	2.36948	0.047	2.49553	-0.472		2.43134	-0.023	2.43088	-0.079	2.43134	-0.002
2.52836	1.552	2.50371	-0.459	2.53473	1.907		2.52861	0.057	2.52861	0.027	2.50371	-0.459		2.40097	0.045	2.52861	-0.22	2.46223	0.023		2.2336	-0.711	2.29809	0.026	2.27606	-0.028		2.52861	1.328	2.40107	0.047	2.52881	-0.475		2.46375	-0.025	2.46329	-0.078	2.46375	-0.001
2.56163	1.547	2.53665	-0.469	2.56808	1.877		2.56188	0.06	2.56188	0.025	2.53665	-0.469		2.43256	0.046	2.56188	-0.216	2.49463	0.024		2.26299	-0.711	2.32832	0.024	2.30601	-0.03		2.56188	1.332	2.43267	0.045	2.56208	-0.484		2.49617	-0.028	2.49571	-0.077	2.49617	0
2.5949	1.544	2.56959	-0.477	2.60143	1.847		2.59515	0.061	2.59515	0.024	2.56959	-0.477		2.46415	0.047	2.59515	-0.212	2.52703	0.029		2.29238	-0.714	2.35856	0.023	2.33596	-0.033		2.59515	1.34	2.46426	0.048	2.59535	-0.481		2.52859	-0.026	2.52812	-0.072	2.52859	0.003
2.62816	1.54	2.60254	-0.489	2.63478	1.813		2.62842	0.065	2.62842	0.029	2.60254	-0.489		2.49575	0.052	2.62842	-0.207	2.55943	0.027		2.32177	-0.714	2.3888	0.02	2.36591	-0.035		2.62842	1.352	2.49585	0.046	2.62863	-0.482		2.56101	-0.023	2.56053	-0.071	2.56101	0.006
2.66143	1.539	2.63548	-0.502	2.66813	1.783		2.6617	0.066	2.6617	0.037	2.63548	-0.502		2.52734	0.055	2.6617	-0.206	2.59183	0.026		2.35116	-0.722	2.41904	0.019	2.39585	-0.033		2.6617	1.361	2.52745	0.046	2.6619	-0.477		2.59343	-0.02	2.59294	-0.073	2.59343	0.006
2.6947	1.537	2.66842	-0.516	2.70148	1.742		2.69497	0.068	2.69497	0.042	2.66842	-0.516		2.55893	0.058	2.69497	-0.208	2.62422	0.027		2.38055	-0.722	2.44928	0.02	2.4258	-0.034		2.69497	1.374	2.55904	0.047	2.69518	-0.478		2.62584	-0.017	2.62535	-0.074	2.62584	0.009
2.72797	1.527	2.70137	-0.524	2.73484	1.701		2.72824	0.066	2.72824	0.04	2.70137	-0.524		2.59052	0.059	2.72824	-0.211	2.65662	0.028		2.40994	-0.723	2.47951	0.023	2.45575	-0.034		2.72824	1.381	2.59063	0.05	2.72845	-0.475		2.65826	-0.018	2.65777	-0.077	2.65826	0.011
2.76123	1.523	2.73431	-0.525	2.76819	1.655		2.76151	0.068	2.76151	0.036	2.73431	-0.525		2.62211	0.061	2.76151	-0.207	2.68902	0.034		2.43933	-0.723	2.50975	0.025	2.4857	-0.035		2.76151	1.395	2.62222	0.052	2.76172	-0.479		2.69068	-0.02	2.69018	-0.077	2.69068	0.007
2.7945	1.514	2.76725	-0.535	2.80154	1.623		2.79478	0.068	2.79478	0.034	2.76725	-0.535		2.6537	0.06	2.79478	-0.201	2.72142	0.033		2.46872	-0.727	2.53999	0.029	2.51565	-0.036		2.79478	1.404	2.65382	0.055	2.795	-0.481		2.7231	-0.021	2.72259	-0.076	2.7231	0.009
2.82777	1.509	2.8002	-0.544	2.83489	1.586		2.82805	0.071	2.82805	0.038	2.8002	-0.544		2.6853	0.059	2.82805	-0.196	2.75381	0.035		2.49811	-0.727	2.57023	0.027	2.54559	-0.04		2.82805	1.415	2.68541	0.059	2.82827	-0.488		2.75551	-0.022	2.755	-0.076	2.75551	0.008
2.86104	1.501	2.83314	-0.55	2.86824	1.546		2.86132	0.074	2.86132	0.042	2.83314	-0.55		2.71689	0.057	2.86132	-0.195	2.78621	0.036		2.5275	-0.729	2.60046	0.027	2.57554	-0.046		2.86132	1.424	2.717	0.059	2.86154	-0.492		2.78793	-0.024	2.78741	-0.076	2.78793	0.007
2.89431	1.492	2.86608	-0.558	2.90159	1.493		2.89459	0.08	2.89459	0.043	2.86608	-0.558		2.74848	0.059	2.89459	-0.2	2.81861	0.037		2.55688	-0.729	2.6307	0.027	2.60549	-0.05		2.89459	1.434	2.7486	0.058	2.89482	-0.493		2.82035	-0.019	2.81982	-0.077	2.82035	0.01
2.92757	1.489	2.89903	-0.569	2.93495	1.445		2.92786	0.085	2.92786	0.046	2.89903	-0.569		2.78007	0.056	2.92786	-0.202	2.85101	0.04		2.58627	-0.737	2.66094	0.029	2.63544	-0.055		2.92786	1.449	2.78019	0.058	2.92809	-0.493		2.85277	-0.018	2.85224	-0.078	2.85277	0.01
2.96084	1.488	2.93197	-0.582	2.9683	1.397		2.96114	0.087	2.96114	0.048	2.93197	-0.582		2.81166	0.056	2.96114	-0.204	2.88341	0.04		2.61566	-0.737	2.69118	0.034	2.66539	-0.057		2.96114	1.464	2.81178	0.062	2.96137	-0.493		2.88519	-0.018	2.88465	-0.078	2.88519	0.01
2.99411	1.481	2.96492	-0.588	3.00165	1.352		2.99441	0.088	2.99441	0.046	2.96492	-0.588		2.84326	0.056	2.99441	-0.2	2.9158	0.04		2.64505	-0.74	2.72142	0.033	2.69534	-0.058		2.99441	1.483	2.84338	0.064	2.99464	-0.493		2.9176	-0.015	2.91706	-0.078	2.9176	0.013
3.02738	1.47	2.99786	-0.599	3.035	1.3		3.02768	0.09	3.02768	0.043	2.99786	-0.599		2.87485	0.057	3.02768	-0.201	2.9482	0.043		2.67444	-0.74	2.75165	0.035	2.72528	-0.056		3.02768	1.501	2.87497	0.066	3.02791	-0.49		2.95002	-0.016	2.94947	-0.077	2.95002	0.012
3.06065	1.461	3.0308	-0.602	3.06835	1.249		3.06095	0.096	3.06095	0.043	3.0308	-0.602		2.90644	0.062	3.06095	-0.198	2.9806	0.04		2.70383	-0.743	2.78189	0.037	2.75523	-0.057		3.06095	1.519	2.90656	0.064	3.06119	-0.492		2.98244	-0.014	2.98188	-0.078	2.98244	0.012
3.09391	1.455	3.06375	-0.607	3.1017	1.19		3.09422	0.1	3.09422	0.04	3.06375	-0.607		2.93803	0.066	3.09422	-0.199	3.013	0.039		2.73322	-0.743	2.81213	0.036	2.78518	-0.061		3.09422	1.533	2.93816	0.065	3.09446	-0.49		3.01486	-0.015	3.01429	-0.078	3.01486	0.014
3.12718	1.451	3.09669	-0.608	3.13506	1.14		3.12749	0.098	3.12749	0.04	3.09669	-0.608		2.96962	0.067	3.12749	-0.199	3.04539	0.039		2.76261	-0.751	2.84237	0.038	2.81513	-0.06		3.12749	1.548	2.96975	0.069	3.12773	-0.496		3.04727	-0.017	3.04671	-0.079	3.04727	0.015
3.16045	1.446	3.12963	-0.614	3.16841	1.084		3.16076	0.102	3.16076	0.036	3.12963	-0.614		3.00121	0.065	3.16076	-0.199	3.07779	0.033		2.792	-0.751	2.87261	0.041	2.84508	-0.06		3.16076	1.565	3.00134	0.07	3.16101	-0.494		3.07969	-0.017	3.07912	-0.079	3.07969	0.015
3.19372	1.442	3.16258	-0.622	3.20176	1.026		3.19403	0.107	3.19403	0.04	3.16258	-0.622		3.03281	0.062	3.19403	-0.195	3.11019	0.031		2.82139	-0.755	2.90284	0.039	2.87502	-0.061		3.19403	1.583	3.03293	0.072	3.19428	-0.499		3.11211	-0.017	3.11153	-0.082	3.11211	0.017
3.22698	1.438	3.19552	-0.625	3.23511	0.966		3.22731	0.109	3.22731	0.04	3.19552	-0.625		3.0644	0.063	3.22731	-0.196	3.14259	0.032		2.85078	-0.755	2.93308	0.042	2.90497	-0.062		3.22731	1.604	3.06453	0.07	3.22756	-0.498		3.14453	-0.016	3.14394	-0.079	3.14453	0.017
3.26025	1.431	3.22846	-0.627	3.26846	0.91		3.26058	0.108	3.26058	0.039	3.22846	-0.627		3.09599	0.068	3.26058	-0.198	3.17499	0.032		2.88017	-0.766	2.96332	0.042	2.93492	-0.062		3.26058	1.624	3.09612	0.071	3.26083	-0.503		3.17695	-0.012	3.17635	-0.078	3.17695	0.016
3.29352	1.419	3.26141	-0.633	3.30181	0.856		3.29385	0.107	3.29385	0.04	3.26141	-0.633		3.12758	0.074	3.29385	-0.202	3.20738	0.032		2.90956	-0.766	2.99356	0.041	2.96487	-0.064		3.29385	1.646	3.12771	0.072	3.2941	-0.504		3.20936	-0.011	3.20877	-0.074	3.20936	0.014
3.32679	1.414	3.29435	-0.642	3.33517	0.8		3.32712	0.11	3.32712	0.044	3.29435	-0.642		3.15917	0.079	3.32712	-0.202	3.23978	0.032		2.93895	-0.771	3.0238	0.04	2.99482	-0.066		3.32712	1.66	3.15931	0.076	3.32738	-0.507		3.24178	-0.01	3.24118	-0.071	3.24178	0.015
3.36006	1.407	3.32729	-0.644	3.36852	0.747		3.36039	0.114	3.36039	0.049	3.32729	-0.644		3.19076	0.078	3.36039	-0.197	3.27218	0.031		2.96834	-0.771	3.05403	0.038	3.02477	-0.072		3.36039	1.676	3.1909	0.079	3.36065	-0.509		3.2742	-0.009	3.27359	-0.07	3.2742	0.014
3.39332	1.4	3.36024	-0.649	3.40187	0.696		3.39366	0.112	3.39366	0.046	3.36024	-0.649		3.22236	0.08	3.39366	-0.197	3.30458	0.029		2.99773	-0.782	3.08427	0.032	3.05471	-0.073		3.39366	1.694	3.22249	0.081	3.39392	-0.508		3.30662	-0.011	3.306	-0.072	3.30662	0.015
3.42659	1.391	3.39318	-0.653	3.43522	0.638		3.42693	0.111	3.42693	0.045	3.39318	-0.653		3.25395	0.084	3.42693	-0.201	3.33698	0.029		3.02712	-0.782	3.11451	0.032	3.08466	-0.076		3.42693	1.713	3.25409	0.083	3.4272	-0.509		3.33903	-0.01	3.33841	-0.072	3.33903	0.019
3.45986	1.386	3.42612	-0.659	3.46857	0.58		3.4602	0.112	3.4602	0.041	3.42612	-0.659		3.28554	0.087	3.4602	-0.203	3.36937	0.025		3.05651	-0.795	3.14475	0.031	3.11461	-0.078		3.4602	1.731	3.28568	0.087	3.46047	-0.509		3.37145	-0.014	3.37082	-0.072	3.37145	0.021
3.49313	1.377	3.45907	-0.661	3.50192	0.52		3.49348	0.114	3.49348	0.047	3.45907	-0.661		3.31713	0.088	3.49348	-0.202	3.40177	0.026		3.0859	-0.795	3.17499	0.032	3.14456	-0.08		3.49348	1.741	3.31727	0.09	3.49375	-0.514		3.40387	-0.013	3.40324	-0.071	3.40387	0.023
3.5264	1.37	3.49201	-0.661	3.53528	0.463		3.52675	0.115	3.52675	0.048	3.49201	-0.661		3.34872	0.087	3.52675	-0.2	3.43417	0.027		3.11529	-0.808	3.20522	0.032	3.17451	-0.082		3.52675	1.753	3.34887	0.09	3.52702	-0.519		3.43629	-0.013	3.43565	-0.069	3.43629	0.025
3.55966	1.363	3.52495	-0.665	3.56863	0.41		3.56002	0.114	3.56002	0.047	3.52495	-0.665		3.38031	0.087	3.56002	-0.199	3.46657	0.026		3.14467	-0.808	3.23546	0.032	3.20445	-0.08		3.56002	1.765	3.38046	0.091	3.56029	-0.517		3.46871	-0.014	3.46806	-0.068	3.46871	0.025
3.59293	1.354	3.5579	-0.668	3.60198	0.355		3.59329	0.113	3.59329	0.039	3.5579	-0.668		3.41191	0.085	3.59329	-0.196	3.49896	0.026		3.17406	-0.817	3.2657	0.032	3.2344	-0.077		3.59329	1.784	3.41205	0.091	3.59357	-0.518		3.50112	-0.012	3.50047	-0.068	3.50112	0.026
3.6262	1.345	3.59084	-0.669	3.63533	0.304		3.62656	0.116	3.62656	0.038	3.59084	-0.669		3.4435	0.092	3.62656	-0.191	3.53136	0.024		3.20345	-0.817	3.29594	0.029	3.26435	-0.072		3.62656	1.802	3.44364	0.095	3.62684	-0.515		3.53354	-0.013	3.53288	-0.067	3.53354	0.029
3.65947	1.336	3.62379	-0.665	3.66868	0.25		3.65983	0.12	3.65983	0.038	3.62379	-0.665		3.47509	0.095	3.65983	-0.19	3.56376	0.021		3.23284	-0.815	3.32618	0.029	3.2943	-0.073		3.65983	1.817	3.47524	0.098	3.66011	-0.513		3.56596	-0.015	3.56529	-0.066	3.56596	0.029
3.69274	1.329	3.65673	-0.671	3.70203	0.202		3.6931	0.123	3.6931	0.039	3.65673	-0.671		3.50668	0.099	3.6931	-0.193	3.59616	0.022		3.26223	-0.815	3.35641	0.025	3.32425	-0.077		3.6931	1.827	3.50683	0.102	3.69339	-0.512		3.59838	-0.014	3.59771	-0.066	3.59838	0.031
3.726	1.323	3.68967	-0.673	3.73539	0.153		3.72637	0.12	3.72637	0.037	3.68967	-0.673		3.53827	0.102	3.72637	-0.197	3.62856	0.021		3.29162	-0.836	3.38665	0.026	3.3542	-0.078		3.72637	1.84	3.53842	0.103	3.72666	-0.506		3.6308	-0.011	3.63012	-0.065	3.6308	0.029
3.75927	1.315	3.72262	-0.679	3.76874	0.105		3.75964	0.121	3.75964	0.036	3.72262	-0.679		3.56986	0.105	3.75964	-0.195	3.66095	0.024		3.32101	-0.836	3.41689	0.027	3.38414	-0.076		3.75964	1.854	3.57002	0.104	3.75994	-0.51		3.66321	-0.011	3.66253	-0.067	3.66321	0.028
3.79254	1.309	3.75556	-0.682	3.80209	0.059		3.79292	0.122	3.79292	0.034	3.75556	-0.682		3.60146	0.107	3.79292	-0.195	3.69335	0.022		3.3504	-0.855	3.44713	0.026	3.41409	-0.079		3.79292	1.868	3.60161	0.105	3.79321	-0.511		3.69563	-0.007	3.69494	-0.066	3.69563	0.03
3.82581	1.299	3.7885	-0.683	3.83544	0.017		3.82619	0.126	3.82619	0.034	3.7885	-0.683		3.63305	0.109	3.82619	-0.189	3.72575	0.02		3.37979	-0.855	3.47737	0.029	3.44404	-0.085		3.82619	1.877	3.6332	0.115	3.82648	-0.518		3.72805	-0.006	3.72735	-0.066	3.72805	0.03
3.85907	1.291	3.82145	-0.678	3.86879	-0.025		3.85946	0.123	3.85946	0.037	3.82145	-0.678		3.66464	0.112	3.85946	-0.195	3.75815	0.017		3.40918	-0.87	3.5076	0.026	3.47399	-0.088		3.85946	1.885	3.6648	0.118	3.85976	-0.523		3.76047	-0.009	3.75977	-0.064	3.76047	0.032
3.89234	1.283	3.85439	-0.677	3.90214	-0.067		3.89273	0.123	3.89273	0.035	3.85439	-0.677		3.69623	0.116	3.89273	-0.194	3.79054	0.013		3.43857	-0.87	3.53784	0.024	3.50394	-0.089		3.89273	1.889	3.69639	0.118	3.89303	-0.524		3.79288	-0.012	3.79218	-0.063	3.79288	0.036
3.92561	1.275	3.88733	-0.679	3.9355	-0.11		3.926	0.122	3.926	0.035	3.88733	-0.679		3.72782	0.118	3.926	-0.199	3.82294	0.013		3.46796	-0.886	3.56808	0.022	3.53388	-0.09		3.926	1.903	3.72798	0.115	3.9263	-0.524		3.8253	-0.013	3.82459	-0.064	3.8253	0.038
3.95888	1.264	3.92028	-0.673	3.96885	-0.154		3.95927	0.128	3.95927	0.036	3.92028	-0.673		3.75942	0.124	3.95927	-0.192	3.85534	0.016		3.49735	-0.886	3.59832	0.021	3.56383	-0.091		3.95927	1.915	3.75958	0.116	3.95958	-0.523		3.85772	-0.01	3.857	-0.063	3.85772	0.038
3.99215	1.256	3.95322	-0.67	4.0022	-0.199		3.99254	0.129	3.99254	0.037	3.95322	-0.67		3.79101	0.123	3.99254	-0.189	3.88774	0.017		3.52674	-0.9	3.62856	0.021	3.59378	-0.092		3.99254	1.927	3.79117	0.123	3.99285	-0.518		3.89014	-0.01	3.88941	-0.062	3.89014	0.042
4.02541	1.245	3.98616	-0.672	4.03555	-0.238		4.02581	0.129	4.02581	0.035	3.98616	-0.672		3.8226	0.125	4.02581	-0.19	3.92014	0.019		3.55613	-0.9	3.65879	0.024	3.62373	-0.091		4.02581	1.933	3.82276	0.127	4.02613	-0.515		3.92256	-0.008	3.92182	-0.062	3.92256	0.039
4.05868	1.239	4.01911	-0.672	4.0689	-0.274		4.05909	0.131	4.05909	0.036	4.01911	-0.672		3.85419	0.121	4.05909	-0.189	3.95253	0.014		3.58552	-0.916	3.68903	0.023	3.65368	-0.092		4.05909	1.943	3.85435	0.127	4.0594	-0.514		3.95497	-0.005	3.95424	-0.063	3.95497	0.039
4.09195	1.231	4.05205	-0.677	4.10225	-0.308		4.09236	0.135	4.09236	0.037	4.05205	-0.677		3.88578	0.124	4.09236	-0.19	3.98493	0.009		3.61491	-0.916	3.71927	0.021	3.68363	-0.097		4.09236	1.946	3.88595	0.124	4.09267	-0.519		3.98739	-0.007	3.98665	-0.066	3.98739	0.043
4.12522	1.226	4.08499	-0.68	4.13561	-0.348		4.12563	0.133	4.12563	0.038	4.08499	-0.68		3.91737	0.126	4.12563	-0.192	4.01733	0.007		3.6443	-0.926	3.74951	0.018	3.71357	-0.093		4.12563	1.956	3.91754	0.122	4.12595	-0.52		4.01981	-0.008	4.01906	-0.068	4.01981	0.044
4.15849	1.217	4.11794	-0.685	4.16896	-0.378		4.1589	0.128	4.1589	0.039	4.11794	-0.685		3.94897	0.129	4.1589	-0.191	4.04973	0.003		3.67369	-0.926	3.77975	0.016	3.74352	-0.093		4.1589	1.968	3.94913	0.124	4.15922	-0.521		4.05223	-0.008	4.05147	-0.07	4.05223	0.047
4.19175	1.21	4.15088	-0.685	4.20231	-0.412		4.19217	0.126	4.19217	0.039	4.15088	-0.685		3.98056	0.131	4.19217	-0.193	4.08213	0.004		3.70307	-0.94	3.80998	0.013	3.77347	-0.094		4.19217	1.978	3.98073	0.128	4.19249	-0.521		4.08464	-0.01	4.08388	-0.07	4.08464	0.049
4.22502	1.206	4.18382	-0.683	4.23566	-0.446		4.22544	0.133	4.22544	0.043	4.18382	-0.683		4.01215	0.134	4.22544	-0.195	4.11452	0.004		3.73246	-0.94	3.84022	0.014	3.80342	-0.096		4.22544	1.984	4.01232	0.129	4.22577	-0.521		4.11706	-0.008	4.11629	-0.07	4.11706	0.052
4.25829	1.203	4.21677	-0.678	4.26901	-0.481		4.25871	0.133	4.25871	0.045	4.21677	-0.678		4.04374	0.137	4.25871	-0.196	4.14692	0.002		3.76185	-0.953	3.87046	0.016	3.83337	-0.095		4.25871	1.982	4.04391	0.131	4.25904	-0.522		4.14948	-0.009	4.14871	-0.07	4.14948	0.052
4.29156	1.193	4.24971	-0.667	4.30236	-0.51		4.29198	0.136	4.29198	0.043	4.24971	-0.667		4.07533	0.141	4.29198	-0.197	4.17932	0.004		3.79124	-0.953	3.9007	0.017	3.86331	-0.096		4.29198	1.986	4.07551	0.136	4.29232	-0.526		4.1819	-0.008	4.18112	-0.071	4.1819	0.056
4.32483	1.181	4.28266	-0.659	4.33572	-0.537		4.32525	0.129	4.32525	0.045	4.28266	-0.659		4.10692	0.139	4.32525	-0.196	4.21172	0.007		3.82063	-0.966	3.93094	0.017	3.89326	-0.1		4.32525	1.995	4.1071	0.138	4.32559	-0.529		4.21432	-0.008	4.21353	-0.068	4.21432	0.059
4.35809	1.169	4.3156	-0.658	4.36907	-0.566		4.35853	0.131	4.35853	0.048	4.3156	-0.658		4.13852	0.141	4.35853	-0.196	4.24411	0.009		3.85002	-0.966	3.96117	0.014	3.92321	-0.098		4.35853	2.004	4.13869	0.141	4.35886	-0.528		4.24673	-0.008	4.24594	-0.067	4.24673	0.061
4.39136	1.16	4.34854	-0.66	4.40242	-0.599		4.3918	0.129	4.3918	0.048	4.34854	-0.66		4.17011	0.143	4.3918	-0.197	4.27651	0.007		3.87941	-0.971	3.99141	0.008	3.95316	-0.098		4.3918	2.01	4.17028	0.137	4.39214	-0.525		4.27915	-0.006	4.27835	-0.065	4.27915	0.064
4.42463	1.15	4.38149	-0.662	4.43577	-0.627		4.42507	0.131	4.42507	0.047	4.38149	-0.662		4.2017	0.142	4.42507	-0.196	4.30891	0.006		3.9088	-0.971	4.02165	0.007	3.98311	-0.095		4.42507	2.015	4.20188	0.141	4.42541	-0.521		4.31157	-0.009	4.31077	-0.064	4.31157	0.066
4.4579	1.14	4.41443	-0.66	4.46912	-0.655		4.45834	0.13	4.45834	0.043	4.41443	-0.66		4.23329	0.145	4.45834	-0.195	4.34131	0		3.93819	-0.979	4.05189	0.003	4.01306	-0.097		4.45834	2.018	4.23347	0.139	4.45868	-0.521		4.34399	-0.008	4.34318	-0.064	4.34399	0.07
4.49116	1.131	4.44737	-0.653	4.50247	-0.678		4.49161	0.129	4.49161	0.042	4.44737	-0.653		4.26488	0.142	4.49161	-0.191	4.37371	-0.001		3.96758	-0.979	4.08213	0.004	4.043	-0.101		4.49161	2.023	4.26506	0.14	4.49196	-0.523		4.37641	-0.006	4.37559	-0.065	4.37641	0.074
4.52443	1.123	4.48032	-0.652	4.53583	-0.7		4.52488	0.128	4.52488	0.044	4.48032	-0.652		4.29647	0.146	4.52488	-0.192	4.4061	0		3.99697	-0.984	4.11236	0.005	4.07295	-0.101		4.52488	2.027	4.29666	0.137	4.52523	-0.524		4.40882	-0.008	4.408	-0.065	4.40882	0.074
4.5577	1.116	4.51326	-0.654	4.56918	-0.725		4.55815	0.125	4.55815	0.049	4.51326	-0.654		4.32807	0.144	4.55815	-0.194	4.4385	0.002		4.02636	-0.984	4.1426	0.002	4.1029	-0.1		4.55815	2.035	4.32825	0.144	4.55851	-0.523		4.44124	-0.006	4.44041	-0.068	4.44124	0.076
4.59097	1.112	4.5462	-0.658	4.60253	-0.75		4.59142	0.126	4.59142	0.055	4.5462	-0.658		4.35966	0.145	4.59142	-0.195	4.4709	0.004		4.05575	-0.988	4.17284	0.005	4.13285	-0.098		4.59142	2.035	4.35984	0.145	4.59178	-0.525		4.47366	-0.006	4.47282	-0.068	4.47366	0.078
4.62424	1.106	4.57915	-0.663	4.63588	-0.775		4.6247	0.126	4.6247	0.059	4.57915	-0.663		4.39125	0.146	4.6247	-0.189	4.5033	0.004		4.08514	-0.988	4.20308	0.006	4.1628	-0.101		4.6247	2.039	4.39144	0.148	4.62505	-0.523		4.50608	-0.007	4.50524	-0.066	4.50608	0.074
4.6575	1.1	4.61209	-0.658	4.66923	-0.797		4.65797	0.125	4.65797	0.063	4.61209	-0.658		4.42284	0.151	4.65797	-0.186	4.53569	0.002		4.11453	-0.996	4.23331	0.008	4.19274	-0.103		4.65797	2.041	4.42303	0.148	4.65833	-0.524		4.53849	-0.008	4.53765	-0.064	4.53849	0.075
4.69077	1.087	4.64503	-0.652	4.70258	-0.818		4.69124	0.128	4.69124	0.063	4.64503	-0.652		4.45443	0.151	4.69124	-0.188	4.56809	-0.001		4.14392	-0.996	4.26355	0.008	4.22269	-0.102		4.69124	2.045	4.45462	0.147	4.6916	-0.523		4.57091	-0.007	4.57006	-0.064	4.57091	0.076
4.72404	1.082	4.67798	-0.65	4.73594	-0.84		4.72451	0.13	4.72451	0.065	4.67798	-0.65		4.48602	0.153	4.72451	-0.189	4.60049	-0.003		4.17331	-0.993	4.29379	0.006	4.25264	-0.102		4.72451	2.048	4.48622	0.151	4.72487	-0.524		4.60333	-0.007	4.60247	-0.063	4.60333	0.077
4.75731	1.073	4.71092	-0.655	4.76929	-0.862		4.75778	0.131	4.75778	0.064	4.71092	-0.655		4.51762	0.153	4.75778	-0.185	4.63289	-0.002		4.2027	-0.993	4.32403	0.003	4.28259	-0.101		4.75778	2.054	4.51781	0.156	4.75815	-0.526		4.63575	-0.008	4.63488	-0.064	4.63575	0.078
4.79058	1.066	4.74386	-0.654	4.80264	-0.882		4.79105	0.127	4.79105	0.068	4.74386	-0.654		4.54921	0.154	4.79105	-0.183	4.66529	-0.005		4.23209	-0.991	4.35427	-0.001	4.31254	-0.1		4.79105	2.062	4.5494	0.157	4.79142	-0.525		4.66817	-0.009	4.66729	-0.067	4.66817	0.077
4.82384	1.054	4.77681	-0.649	4.83599	-0.903		4.82432	0.125	4.82432	0.068	4.77681	-0.649		4.5808	0.154	4.82432	-0.184	4.69768	-0.005		4.26147	-0.991	4.3845	0	4.34249	-0.1		4.82432	2.063	4.58099	0.157	4.8247	-0.523		4.70058	-0.01	4.69971	-0.068	4.70058	0.074
4.85711	1.046	4.80975	-0.647	4.86934	-0.923		4.85759	0.127	4.85759	0.068	4.80975	-0.647		4.61239	0.154	4.85759	-0.186	4.73008	-0.009		4.29086	-0.986	4.41474	0	4.37243	-0.102		4.85759	2.066	4.61259	0.157	4.85797	-0.516		4.733	-0.011	4.73212	-0.069	4.733	0.074
4.89038	1.039	4.84269	-0.646	4.90269	-0.938		4.89087	0.127	4.89087	0.065	4.84269	-0.646		4.64398	0.153	4.89087	-0.191	4.76248	-0.006		4.32025	-0.986	4.44498	0.003	4.40238	-0.107		4.89087	2.07	4.64418	0.159	4.89124	-0.52		4.76542	-0.012	4.76453	-0.074	4.76542	0.076
4.92365	1.034	4.87564	-0.643	4.93605	-0.953		4.92414	0.127	4.92414	0.065	4.87564	-0.643		4.67558	0.156	4.92414	-0.196	4.79488	-0.006		4.34964	-0.99	4.47522	0.005	4.43233	-0.108		4.92414	2.072	4.67577	0.162	4.92452	-0.524		4.79784	-0.009	4.79694	-0.078	4.79784	0.076
4.95691	1.031	4.90858	-0.641	4.9694	-0.968		4.95741	0.124	4.95741	0.069	4.90858	-0.641		4.70717	0.154	4.95741	-0.192	4.82727	-0.003		4.37903	-0.99	4.50546	0.004	4.46228	-0.108		4.95741	2.075	4.70737	0.162	4.95779	-0.527		4.83025	-0.009	4.82935	-0.077	4.83025	0.075
4.99018	1.028	4.94153	-0.638	5.00275	-0.984		4.99068	0.121	4.99068	0.074	4.94153	-0.638		4.73876	0.157	4.99068	-0.189	4.85967	-0.003		4.40842	-0.99	4.53569	0.002	4.49223	-0.105		4.99068	2.076	4.73896	0.16	4.99107	-0.528		4.86267	-0.007	4.86177	-0.077	4.86267	0.071
5.02345	1.023	4.97447	-0.632	5.0361	-1.002		5.02395	0.12	5.02395	0.075	4.97447	-0.632		4.77035	0.158	5.02395	-0.184	4.89207	-0.003		4.43781	-0.99	4.56593	-0.001	4.52217	-0.106		5.02395	2.076	4.77055	0.158	5.02434	-0.524		4.89509	-0.008	4.89418	-0.076	4.89509	0.07
5.05672	1.012	5.00741	-0.626	5.06945	-1.019		5.05722	0.121	5.05722	0.078	5.00741	-0.626		4.80194	0.16	5.05722	-0.19	4.92447	-0.004		4.4672	-0.988	4.59617	-0.003	4.55212	-0.106		5.05722	2.077	4.80215	0.153	5.05761	-0.52		4.92751	-0.006	4.92659	-0.074	4.92751	0.068
5.08999	1.002	5.04036	-0.623	5.1028	-1.034		5.09049	0.122	5.09049	0.081	5.04036	-0.623		4.83353	0.163	5.09049	-0.193	4.95687	-0.004		4.49659	-0.988	4.62641	-0.002	4.58207	-0.108		5.09049	2.083	4.83374	0.155	5.09089	-0.519		4.95993	-0.005	4.959	-0.077	4.95993	0.069
5.12325	0.992	5.0733	-0.62	5.13616	-1.047		5.12376	0.125	5.12376	0.082	5.0733	-0.62		4.86513	0.165	5.12376	-0.191	4.98926	-0.008		4.52598	-0.984	4.65665	-0.004	4.61202	-0.109		5.12376	2.087	4.86533	0.155	5.12416	-0.519		4.99234	-0.003	4.99141	-0.08	4.99234	0.071
5.15652	0.986	5.10624	-0.619	5.16951	-1.06		5.15703	0.122	5.15703	0.085	5.10624	-0.619		4.89672	0.166	5.15703	-0.19	5.02166	-0.011		4.55537	-0.984	4.68688	-0.007	4.64197	-0.109		5.15703	2.09	4.89693	0.158	5.15743	-0.518		5.02476	-0.003	5.02382	-0.083	5.02476	0.071
5.18979	0.977	5.13919	-0.615	5.20286	-1.075		5.19031	0.118	5.19031	0.087	5.13919	-0.615		4.92831	0.162	5.19031	-0.188	5.05406	-0.01		4.58476	-0.974	4.71712	-0.009	4.67192	-0.111		5.19031	2.093	4.92852	0.164	5.19071	-0.516		5.05718	-0.003	5.05624	-0.088	5.05718	0.074
5.22306	0.971	5.17213	-0.615	5.23621	-1.086		5.22358	0.114	5.22358	0.091	5.17213	-0.615		4.9599	0.162	5.22358	-0.188	5.08646	-0.013		4.61415	-0.974	4.74736	-0.008	4.70186	-0.115		5.22358	2.098	4.96011	0.158	5.22398	-0.511		5.0896	-0.001	5.08865	-0.088	5.0896	0.077
5.25633	0.969	5.20507	-0.61	5.26956	-1.1		5.25685	0.114	5.25685	0.091	5.20507	-0.61		4.99149	0.162	5.25685	-0.189	5.11886	-0.012		4.64354	-0.972	4.7776	-0.006	4.73181	-0.115		5.25685	2.101	4.9917	0.155	5.25726	-0.512		5.12201	-0.001	5.12106	-0.085	5.12201	0.078
5.28959	0.964	5.23802	-0.607	5.30291	-1.105		5.29012	0.116	5.29012	0.093	5.23802	-0.607		5.02308	0.166	5.29012	-0.188	5.15125	-0.011		4.67293	-0.972	4.80784	-0.003	4.76176	-0.113		5.29012	2.106	5.0233	0.152	5.29053	-0.515		5.15443	-0.002	5.15347	-0.087	5.15443	0.08
5.32286	0.955	5.27096	-0.607	5.33627	-1.113		5.32339	0.117	5.32339	0.092	5.27096	-0.607		5.05468	0.166	5.32339	-0.187	5.18365	-0.011		4.70232	-0.967	4.83807	-0.002	4.79171	-0.113		5.32339	2.107	5.05489	0.154	5.3238	-0.52		5.18685	-0.001	5.18588	-0.086	5.18685	0.083
5.35613	0.949	5.3039	-0.606	5.36962	-1.122		5.35666	0.119	5.35666	0.094	5.3039	-0.606		5.08627	0.167	5.35666	-0.185	5.21605	-0.01		4.73171	-0.967	4.86831	-0.004	4.82166	-0.114		5.35666	2.108	5.08648	0.159	5.35708	-0.522		5.21927	0	5.21829	-0.087	5.21927	0.082
5.3894	0.942	5.33685	-0.607	5.40297	-1.135		5.38993	0.119	5.38993	0.093	5.33685	-0.607		5.11786	0.166	5.38993	-0.185	5.24845	-0.009		4.7611	-0.956	4.89855	-0.004	4.8516	-0.115		5.38993	2.105	5.11808	0.156	5.39035	-0.521		5.25169	0	5.25071	-0.086	5.25169	0.082
5.42267	0.938	5.36979	-0.601	5.43632	-1.147		5.4232	0.115	5.4232	0.096	5.36979	-0.601		5.14945	0.163	5.4232	-0.182	5.28084	-0.011		4.79049	-0.956	4.92879	-0.005	4.88155	-0.114		5.4232	2.11	5.14967	0.158	5.42362	-0.52		5.2841	0	5.28312	-0.087	5.2841	0.083
5.45593	0.937	5.40273	-0.596	5.46967	-1.154		5.45648	0.11	5.45648	0.097	5.40273	-0.596		5.18104	0.165	5.45648	-0.181	5.31324	-0.012		4.81987	-0.95	4.95903	-0.004	4.9115	-0.113		5.45648	2.115	5.18126	0.157	5.4569	-0.519		5.31652	0.002	5.31553	-0.085	5.31652	0.08
5.4892	0.934	5.43568	-0.596	5.50302	-1.168		5.48975	0.106	5.48975	0.1	5.43568	-0.596		5.21263	0.163	5.48975	-0.183	5.34564	-0.01		4.84926	-0.95	4.98926	-0.008	4.94145	-0.112		5.48975	2.121	5.21286	0.16	5.49017	-0.515		5.34894	0.001	5.34794	-0.082	5.34894	0.078
5.52247	0.927	5.46862	-0.594	5.53638	-1.183		5.52302	0.106	5.52302	0.1	5.46862	-0.594		5.24423	0.168	5.52302	-0.182	5.37804	-0.01		4.87865	-0.94	5.0195	-0.011	4.9714	-0.11		5.52302	2.125	5.24445	0.161	5.52345	-0.513		5.38136	0.002	5.38035	-0.08	5.38136	0.078
5.55574	0.918	5.50156	-0.593	5.56973	-1.195		5.55629	0.1	5.55629	0.102	5.50156	-0.593		5.27582	0.174	5.55629	-0.181	5.41044	-0.008		4.90804	-0.94	5.04974	-0.009	5.00135	-0.11		5.55629	2.128	5.27604	0.162	5.55672	-0.509		5.41378	0.002	5.41277	-0.079	5.41378	0.077
5.589	0.911	5.53451	-0.589	5.60308	-1.198		5.58956	0.098	5.58956	0.1	5.53451	-0.589		5.30741	0.178	5.58956	-0.178	5.44283	-0.006		4.93743	-0.926	5.07998	-0.012	5.03129	-0.113		5.58956	2.126	5.30764	0.16	5.58999	-0.507		5.44619	0.004	5.44518	-0.078	5.44619	0.079
5.62227	0.906	5.56745	-0.588	5.63643	-1.205		5.62283	0.094	5.62283	0.101	5.56745	-0.588		5.339	0.178	5.62283	-0.178	5.47523	-0.007		4.96682	-0.926	5.11022	-0.012	5.06124	-0.117		5.62283	2.124	5.33923	0.163	5.62327	-0.506		5.47861	0.004	5.47759	-0.08	5.47861	0.082
5.65554	0.902	5.6004	-0.581	5.66978	-1.21		5.6561	0.088	5.6561	0.102	5.6004	-0.581		5.37059	0.176	5.6561	-0.181	5.50763	-0.004		4.99621	-0.907	5.14045	-0.011	5.09119	-0.121		5.6561	2.126	5.37082	0.164	5.65654	-0.506		5.51103	0.007	5.51	-0.079	5.51103	0.087
5.68881	0.898	5.63334	-0.577	5.70313	-1.216		5.68937	0.079	5.68937	0.105	5.63334	-0.577		5.40218	0.174	5.68937	-0.184	5.54003	-0.007		5.0256	-0.907	5.17069	-0.011	5.12114	-0.122		5.68937	2.129	5.40241	0.167	5.68981	-0.505		5.54345	0.009	5.54241	-0.076	5.54345	0.087
5.72208	0.9	5.66628	-0.581	5.73649	-1.224		5.72265	0.066	5.72265	0.106	5.66628	-0.581		5.43378	0.171	5.72265	-0.183	5.57242	-0.007		5.05499	-0.898	5.20093	-0.009	5.15109	-0.119		5.72265	2.134	5.43401	0.166	5.72309	-0.503		5.57586	0.011	5.57482	-0.073	5.57586	0.089
5.75534	0.896	5.69923	-0.582	5.76984	-1.24		5.75592	0.059	5.75592	0.106	5.69923	-0.582		5.46537	0.174	5.75592	-0.18	5.60482	-0.008		5.08438	-0.898	5.23117	-0.008	5.18103	-0.115		5.75592	2.137	5.4656	0.168	5.75636	-0.5		5.60828	0.01	5.60724	-0.07	5.60828	0.09
5.78861	0.891	5.73217	-0.584	5.80319	-1.249		5.78919	0.052	5.78919	0.106	5.73217	-0.584		5.49696	0.173	5.78919	-0.177	5.63722	-0.009		5.11377	-0.89	5.26141	-0.01	5.21098	-0.117		5.78919	2.139	5.49719	0.17	5.78964	-0.499		5.6407	0.011	5.63965	-0.068	5.6407	0.089
5.82188	0.886	5.76511	-0.577	5.83654	-1.259		5.82246	0.048	5.82246	0.107	5.76511	-0.577		5.52855	0.173	5.82246	-0.173	5.66962	-0.012		5.14316	-0.89	5.29164	-0.012	5.24093	-0.117		5.82246	2.139	5.52879	0.172	5.82291	-0.5		5.67312	0.012	5.67206	-0.067	5.67312	0.087
5.85515	0.884	5.79806	-0.574	5.86989	-1.268		5.85573	0.037	5.85573	0.107	5.79806	-0.574		5.56014	0.172	5.85573	-0.173	5.70202	-0.015		5.17255	-0.883	5.32188	-0.011	5.27088	-0.117		5.85573	2.141	5.56038	0.17	5.85618	-0.503		5.70554	0.013	5.70447	-0.065	5.70554	0.086
5.88842	0.881	5.831	-0.57	5.90324	-1.275		5.889	0.031	5.889	0.108	5.831	-0.57		5.59174	0.175	5.889	-0.178	5.73441	-0.016		5.20194	-0.883	5.35212	-0.01	5.30083	-0.108		5.889	2.144	5.59197	0.167	5.88946	-0.505		5.73795	0.014	5.73688	-0.064	5.73795	0.085
5.92168	0.877	5.86394	-0.57	5.9366	-1.28		5.92227	0.026	5.92227	0.108	5.86394	-0.57		5.62333	0.179	5.92227	-0.183	5.76681	-0.016		5.23133	-0.869	5.38236	-0.01	5.33078	-0.106		5.92227	2.147	5.62357	0.169	5.92273	-0.503		5.77037	0.019	5.7693	-0.061	5.77037	0.083
5.95495	0.879	5.89689	-0.56	5.96995	-1.286		5.95554	0.024	5.95554	0.11	5.89689	-0.56		5.65492	0.177	5.95554	-0.181	5.79921	-0.018		5.26072	-0.869	5.4126	-0.007	5.36072	-0.106		5.95554	2.154	5.65516	0.173	5.956	-0.5		5.80279	0.02	5.80171	-0.059	5.80279	0.084
5.98822	0.879	5.92983	-0.557	6.0033	-1.297		5.98881	0.019	5.98881	0.114	5.92983	-0.557		5.68651	0.175	5.98881	-0.175	5.83161	-0.015		5.29011	-0.851	5.44283	-0.006	5.39067	-0.108		5.98881	2.159	5.68675	0.175	5.98928	-0.499		5.83521	0.018	5.83412	-0.059	5.83521	0.085
6.02149	0.879	5.96277	-0.553	6.03665	-1.308		6.02209	0.012	6.02209	0.119	5.96277	-0.553		5.7181	0.171	6.02209	-0.173	5.86401	-0.02		5.3195	-0.851	5.47307	-0.007	5.42062	-0.114		6.02209	2.156	5.71835	0.175	6.02255	-0.497		5.86762	0.017	5.86653	-0.054	5.86762	0.087
6.05476	0.876	5.99572	-0.556	6.07	-1.318		6.05536	0.003	6.05536	0.123	5.99572	-0.556		5.74969	0.168	6.05536	-0.176	5.8964	-0.021		5.34889	-0.841	5.50331	-0.004	5.45057	-0.109		6.05536	2.153	5.74994	0.177	6.05583	-0.5		5.90004	0.018	5.89894	-0.05	5.90004	0.091
6.08802	0.88	6.02866	-0.554	6.10335	-1.323		6.08863	-0.002	6.08863	0.125	6.02866	-0.554		5.78129	0.17	6.08863	-0.178	5.9288	-0.02		5.37828	-0.841	5.53355	-0.007	5.48052	-0.107		6.08863	2.154	5.78153	0.178	6.0891	-0.496		5.93246	0.016	5.93135	-0.046	5.93246	0.092
6.12129	0.882	6.0616	-0.546	6.13671	-1.33		6.1219	-0.008	6.1219	0.126	6.0616	-0.546		5.81288	0.173	6.1219	-0.178	5.9612	-0.022		5.40766	-0.826	5.56379	-0.008	5.51046	-0.101		6.1219	2.16	5.81312	0.18	6.12237	-0.499		5.96488	0.019	5.96377	-0.043	5.96488	0.094
6.15456	0.884	6.09455	-0.545	6.17006	-1.333		6.15517	-0.015	6.15517	0.132	6.09455	-0.545		5.84447	0.177	6.15517	-0.176	5.9936	-0.021		5.43705	-0.826	5.59402	-0.008	5.54041	-0.102		6.15517	2.167	5.84472	0.183	6.15565	-0.501		5.9973	0.021	5.99618	-0.042	5.9973	0.092
6.18783	0.883	6.12749	-0.545	6.20341	-1.337		6.18844	-0.022	6.18844	0.134	6.12749	-0.545		5.87606	0.174	6.18844	-0.175	6.02599	-0.023		5.46644	-0.82	5.62426	-0.01	5.57036	-0.104		6.18844	2.171	5.87631	0.19	6.18892	-0.505		6.02971	0.023	6.02859	-0.04	6.02971	0.09
6.22109	0.886	6.16043	-0.544	6.23676	-1.343		6.22171	-0.029	6.22171	0.142	6.16043	-0.544		5.90765	0.171	6.22171	-0.174	6.05839	-0.021		5.49583	-0.82	5.6545	-0.01	5.60031	-0.104		6.22171	2.172	5.9079	0.191	6.22219	-0.503		6.06213	0.021	6.061	-0.037	6.06213	0.09
6.25436	0.888	6.19338	-0.541	6.27011	-1.352		6.25498	-0.04	6.25498	0.141	6.19338	-0.541		5.93924	0.167	6.25498	-0.169	6.09079	-0.02		5.52522	-0.805	5.68474	-0.012	5.63026	-0.102		6.25498	2.174	5.9395	0.191	6.25547	-0.5		6.09455	0.023	6.09341	-0.034	6.09455	0.09
6.28763	0.895	6.22632	-0.541	6.30346	-1.36		6.28826	-0.044	6.28826	0.138	6.22632	-0.541		5.97084	0.165	6.28826	-0.174	6.12319	-0.018		5.55461	-0.805	5.71498	-0.016	5.66021	-0.104		6.28826	2.181	5.97109	0.187	6.28874	-0.495		6.12697	0.024	6.12582	-0.029	6.12697	0.095
6.3209	0.896	6.25927	-0.539	6.33682	-1.365		6.32153	-0.049	6.32153	0.138	6.25927	-0.539		6.00243	0.162	6.32153	-0.173	6.15559	-0.019		5.584	-0.793	5.74521	-0.015	5.69015	-0.109		6.32153	2.186	6.00268	0.189	6.32202	-0.495		6.15938	0.024	6.15824	-0.026	6.15938	0.096
6.35417	0.901	6.29221	-0.534	6.37017	-1.373		6.3548	-0.054	6.3548	0.142	6.29221	-0.534		6.03402	0.163	6.3548	-0.173	6.18798	-0.024		5.61339	-0.793	5.77545	-0.017	5.7201	-0.105		6.3548	2.188	6.03428	0.192	6.35529	-0.494		6.1918	0.026	6.19065	-0.022	6.1918	0.097
6.38743	0.905	6.32515	-0.527	6.40352	-1.379		6.38807	-0.059	6.38807	0.143	6.32515	-0.527		6.06561	0.162	6.38807	-0.166	6.22038	-0.025		5.64278	-0.776	5.80569	-0.017	5.75005	-0.1		6.38807	2.189	6.06587	0.194	6.38856	-0.492		6.22422	0.024	6.22306	-0.02	6.22422	0.097
6.4207	0.912	6.3581	-0.522	6.43687	-1.385		6.42134	-0.07	6.42134	0.144	6.3581	-0.522		6.0972	0.161	6.42134	-0.162	6.25278	-0.027		5.67217	-0.776	5.83593	-0.015	5.78	-0.096		6.42134	2.193	6.09746	0.189	6.42184	-0.494		6.25664	0.023	6.25547	-0.015	6.25664	0.099
6.45397	0.917	6.39104	-0.529	6.47022	-1.382		6.45461	-0.08	6.45461	0.142	6.39104	-0.529		6.12879	0.157	6.45461	-0.161	6.28518	-0.027		5.70156	-0.762	5.86616	-0.02	5.80995	-0.099		6.45461	2.196	6.12906	0.185	6.45511	-0.492		6.28906	0.024	6.28788	-0.011	6.28906	0.1
6.48724	0.923	6.42398	-0.529	6.50357	-1.382		6.48788	-0.091	6.48788	0.142	6.42398	-0.529		6.16039	0.156	6.48788	-0.163	6.31757	-0.022		5.73095	-0.762	5.8964	-0.021	5.83989	-0.101		6.48788	2.198	6.16065	0.188	6.48838	-0.497		6.32147	0.025	6.3203	-0.009	6.32147	0.101
6.52051	0.929	6.45693	-0.526	6.53693	-1.385		6.52115	-0.096	6.52115	0.145	6.45693	-0.526		6.19198	0.15	6.52115	-0.163	6.34997	-0.021		5.76034	-0.742	5.92664	-0.02	5.86984	-0.103		6.52115	2.198	6.19224	0.189	6.52166	-0.495		6.35389	0.026	6.35271	-0.008	6.35389	0.102
6.55377	0.937	6.48987	-0.523	6.57028	-1.386		6.55442	-0.099	6.55442	0.143	6.48987	-0.523		6.22357	0.142	6.55442	-0.166	6.38237	-0.018		5.78973	-0.742	5.95688	-0.022	5.89979	-0.106		6.55442	2.2	6.22383	0.193	6.55493	-0.494		6.38631	0.03	6.38512	-0.006	6.38631	0.101
6.58704	0.941	6.52281	-0.521	6.60363	-1.389		6.5877	-0.104	6.5877	0.147	6.52281	-0.521		6.25516	0.139	6.5877	-0.166	6.41477	-0.017		5.81912	-0.731	5.98712	-0.022	5.92974	-0.103		6.5877	2.204	6.25543	0.194	6.58821	-0.49		6.41873	0.035	6.41753	-0.008	6.41873	0.102
6.62031	0.949	6.55576	-0.515	6.63698	-1.39		6.62097	-0.104	6.62097	0.145	6.55576	-0.515		6.28675	0.137	6.62097	-0.168	6.44717	-0.022		5.84851	-0.731	6.01735	-0.022	5.95969	-0.098		6.62097	2.206	6.28702	0.197	6.62148	-0.49		6.45115	0.035	6.44994	-0.005	6.45115	0.101
6.65358	0.959	6.5887	-0.51	6.67033	-1.39		6.65424	-0.106	6.65424	0.15	6.5887	-0.51		6.31834	0.134	6.65424	-0.165	6.47956	-0.025		5.8779	-0.714	6.04759	-0.023	5.98964	-0.093		6.65424	2.21	6.31861	0.196	6.65475	-0.488		6.48356	0.036	6.48235	-0.005	6.48356	0.103
6.68685	0.965	6.62164	-0.505	6.70368	-1.387		6.68751	-0.113	6.68751	0.145	6.62164	-0.505		6.34994	0.125	6.68751	-0.168	6.51196	-0.027		5.90729	-0.714	6.07783	-0.021	6.01958	-0.095		6.68751	2.212	6.35021	0.197	6.68803	-0.489		6.51598	0.038	6.51477	-0.002	6.51598	0.104
6.72011	0.969	6.65459	-0.499	6.73704	-1.386		6.72078	-0.119	6.72078	0.144	6.65459	-0.499		6.38153	0.118	6.72078	-0.17	6.54436	-0.026		5.93668	-0.7	6.10807	-0.017	6.04953	-0.093		6.72078	2.218	6.3818	0.195	6.7213	-0.493		6.5484	0.038	6.54718	0	6.5484	0.105
6.75338	0.971	6.68753	-0.496	6.77039	-1.388		6.75405	-0.123	6.75405	0.145	6.68753	-0.496		6.41312	0.113	6.75405	-0.17	6.57676	-0.025		5.96606	-0.7	6.13831	-0.02	6.07948	-0.09		6.75405	2.219	6.41339	0.199	6.75457	-0.489		6.58082	0.04	6.57959	0.001	6.58082	0.106
6.78665	0.979	6.72047	-0.495	6.80374	-1.39		6.78732	-0.126	6.78732	0.149	6.72047	-0.495		6.44471	0.11	6.78732	-0.166	6.60915	-0.023		5.99545	-0.691	6.16854	-0.02	6.10943	-0.085		6.78732	2.225	6.44499	0.2	6.78785	-0.486		6.61323	0.043	6.612	0.003	6.61323	0.108
6.81992	0.988	6.75342	-0.495	6.83709	-1.392		6.82059	-0.133	6.82059	0.151	6.75342	-0.495		6.4763	0.105	6.82059	-0.163	6.64155	-0.025		6.02484	-0.691	6.19878	-0.025	6.13938	-0.084		6.82059	2.229	6.47658	0.206	6.82112	-0.484		6.64565	0.045	6.64441	0.005	6.64565	0.107
6.85318	0.999	6.78636	-0.496	6.87044	-1.395		6.85387	-0.14	6.85387	0.15	6.78636	-0.496		6.5079	0.098	6.85387	-0.162	6.67395	-0.026		6.05423	-0.671	6.22902	-0.028	6.16932	-0.084		6.85387	2.232	6.50817	0.211	6.8544	-0.485		6.67807	0.043	6.67682	0.004	6.67807	0.105
6.88645	1.005	6.8193	-0.495	6.90379	-1.389		6.88714	-0.142	6.88714	0.147	6.8193	-0.495		6.53949	0.091	6.88714	-0.163	6.70635	-0.032		6.08362	-0.671	6.25926	-0.028	6.19927	-0.086		6.88714	2.231	6.53976	0.212	6.88767	-0.485		6.71049	0.045	6.70924	0.004	6.71049	0.106
6.91972	1.013	6.85225	-0.495	6.93715	-1.383		6.92041	-0.146	6.92041	0.146	6.85225	-0.495		6.57108	0.082	6.92041	-0.158	6.73875	-0.031		6.11301	-0.657	6.2895	-0.027	6.22922	-0.084		6.92041	2.234	6.57136	0.211	6.92094	-0.48		6.74291	0.044	6.74165	0.005	6.74291	0.106
6.95299	1.019	6.88519	-0.491	6.9705	-1.38		6.95368	-0.145	6.95368	0.148	6.88519	-0.491		6.60267	0.077	6.95368	-0.151	6.77114	-0.029		6.1424	-0.657	6.31973	-0.022	6.25917	-0.08		6.95368	2.242	6.60295	0.205	6.95422	-0.475		6.77532	0.044	6.77406	0.005	6.77532	0.107
6.98626	1.03	6.91814	-0.488	7.00385	-1.38		6.98695	-0.144	6.98695	0.153	6.91814	-0.488		6.63426	0.071	6.98695	-0.145	6.80354	-0.03		6.17179	-0.647	6.34997	-0.021	6.28912	-0.075		6.98695	2.244	6.63454	0.201	6.98749	-0.474		6.80774	0.045	6.80647	0.009	6.80774	0.111
7.01952	1.035	6.95108	-0.485	7.0372	-1.377		7.02022	-0.146	7.02022	0.155	6.95108	-0.485		6.66585	0.064	7.02022	-0.144	6.83594	-0.03		6.20118	-0.647	6.38021	-0.018	6.31906	-0.075		7.02022	2.247	6.66614	0.2	7.02076	-0.475		6.84016	0.043	6.83888	0.011	6.84016	0.112
7.05279	1.043	6.98402	-0.48	7.07055	-1.371		7.05349	-0.147	7.05349	0.153	6.98402	-0.48		6.69745	0.06	7.05349	-0.147	6.86834	-0.03		6.23057	-0.632	6.41045	-0.018	6.34901	-0.073		7.05349	2.247	6.69773	0.199	7.05404	-0.473		6.87258	0.043	6.8713	0.013	6.87258	0.113
7.08606	1.051	7.01697	-0.471	7.1039	-1.367		7.08676	-0.15	7.08676	0.149	7.01697	-0.471		6.72904	0.059	7.08676	-0.149	6.90074	-0.034		6.25996	-0.632	6.44069	-0.023	6.37896	-0.074		7.08676	2.249	6.72932	0.203	7.08731	-0.467		6.90499	0.042	6.90371	0.016	6.90499	0.109
7.11933	1.059	7.04991	-0.466	7.13726	-1.365		7.12004	-0.151	7.12004	0.146	7.04991	-0.466		6.76063	0.059	7.12004	-0.148	6.93313	-0.037		6.28935	-0.611	6.47092	-0.023	6.40891	-0.071		7.12004	2.25	6.76092	0.203	7.12059	-0.471		6.93741	0.043	6.93612	0.015	6.93741	0.109
7.1526	1.066	7.08285	-0.464	7.17061	-1.361		7.15331	-0.159	7.15331	0.15	7.08285	-0.464		6.79222	0.058	7.15331	-0.144	6.96553	-0.04		6.31874	-0.611	6.50116	-0.026	6.43886	-0.069		7.15331	2.253	6.79251	0.212	7.15386	-0.467		6.96983	0.042	6.96853	0.017	6.96983	0.106
7.18586	1.073	7.1158	-0.462	7.20396	-1.355		7.18658	-0.162	7.18658	0.151	7.1158	-0.462		6.82381	0.054	7.18658	-0.145	6.99793	-0.042		6.34813	-0.596	6.5314	-0.026	6.46881	-0.067		7.18658	2.256	6.8241	0.214	7.18713	-0.462		7.00225	0.043	7.00094	0.016	7.00225	0.106
7.21913	1.082	7.14874	-0.455	7.23731	-1.351		7.21985	-0.163	7.21985	0.157	7.14874	-0.455		6.8554	0.049	7.21985	-0.149	7.03033	-0.043		6.37752	-0.596	6.56164	-0.026	6.49875	-0.063		7.21985	2.261	6.8557	0.218	7.22041	-0.453		7.03467	0.044	7.03335	0.018	7.03467	0.107
7.2524	1.089	7.18168	-0.451	7.27066	-1.351		7.25312	-0.163	7.25312	0.16	7.18168	-0.451		6.887	0.042	7.25312	-0.152	7.06272	-0.04		6.40691	-0.585	6.59188	-0.024	6.5287	-0.06		7.25312	2.262	6.88729	0.218	7.25368	-0.451		7.06708	0.044	7.06577	0.021	7.06708	0.107
7.28567	1.097	7.21463	-0.45	7.30401	-1.351		7.28639	-0.164	7.28639	0.164	7.21463	-0.45		6.91859	0.042	7.28639	-0.15	7.09512	-0.038		6.4363	-0.585	6.62211	-0.024	6.55865	-0.058		7.28639	2.265	6.91888	0.217	7.28695	-0.452		7.0995	0.044	7.09818	0.024	7.0995	0.106
7.31893	1.104	7.24757	-0.449	7.33737	-1.348		7.31966	-0.166	7.31966	0.162	7.24757	-0.449		6.95018	0.041	7.31966	-0.145	7.12752	-0.037		6.46569	-0.573	6.65235	-0.027	6.5886	-0.059		7.31966	2.267	6.95047	0.22	7.32023	-0.454		7.13192	0.044	7.13059	0.027	7.13192	0.107
7.3522	1.114	7.28051	-0.452	7.37072	-1.344		7.35293	-0.169	7.35293	0.165	7.28051	-0.452		6.98177	0.041	7.35293	-0.136	7.15992	-0.039		6.49508	-0.573	6.68259	-0.027	6.61855	-0.057		7.35293	2.271	6.98207	0.218	7.3535	-0.453		7.16434	0.042	7.163	0.03	7.16434	0.109
7.38547	1.124	7.31346	-0.448	7.40407	-1.335		7.3862	-0.168	7.3862	0.168	7.31346	-0.448		7.01336	0.042	7.3862	-0.133	7.19232	-0.038		6.52446	-0.564	6.71283	-0.032	6.64849	-0.054		7.3862	2.275	7.01366	0.218	7.38678	-0.451		7.19676	0.042	7.19541	0.031	7.19676	0.107
7.41874	1.135	7.3464	-0.438	7.43742	-1.335		7.41948	-0.168	7.41948	0.166	7.3464	-0.438		7.04495	0.048	7.41948	-0.13	7.22471	-0.038		6.55385	-0.564	6.74307	-0.031	6.67844	-0.049		7.41948	2.272	7.04525	0.219	7.42005	-0.447		7.22917	0.042	7.22782	0.032	7.22917	0.105
7.45201	1.143	7.37934	-0.434	7.47077	-1.329		7.45275	-0.17	7.45275	0.161	7.37934	-0.434		7.07655	0.052	7.45275	-0.131	7.25711	-0.036		6.58324	-0.555	6.7733	-0.029	6.70839	-0.044		7.45275	2.271	7.07685	0.222	7.45332	-0.442		7.26159	0.043	7.26024	0.031	7.26159	0.106
7.48527	1.151	7.41229	-0.433	7.50412	-1.327		7.48602	-0.168	7.48602	0.159	7.41229	-0.433		7.10814	0.051	7.48602	-0.129	7.28951	-0.035		6.61263	-0.555	6.80354	-0.03	6.73834	-0.038		7.48602	2.277	7.10844	0.226	7.4866	-0.441		7.29401	0.043	7.29265	0.03	7.29401	0.104
7.51854	1.16	7.44523	-0.431	7.53748	-1.321		7.51929	-0.164	7.51929	0.162	7.44523	-0.431		7.13973	0.05	7.51929	-0.126	7.32191	-0.033		6.64202	-0.533	6.83378	-0.029	6.76829	-0.035		7.51929	2.285	7.14003	0.227	7.51987	-0.435		7.32643	0.044	7.32506	0.027	7.32643	0.105
7.55181	1.165	7.47817	-0.427	7.57083	-1.319		7.55256	-0.162	7.55256	0.166	7.47817	-0.427		7.17132	0.051	7.55256	-0.12	7.3543	-0.035		6.67141	-0.533	6.86402	-0.03	6.79824	-0.024		7.55256	2.289	7.17163	0.226	7.55315	-0.43		7.35884	0.044	7.35747	0.026	7.35884	0.105
7.58508	1.17	7.51112	-0.422	7.60418	-1.317		7.58583	-0.162	7.58583	0.167	7.51112	-0.422		7.20291	0.051	7.58583	-0.114	7.3867	-0.036		6.7008	-0.527	6.89426	-0.033	6.82818	-0.018		7.58583	2.289	7.20322	0.226	7.58642	-0.423		7.39126	0.043	7.38988	0.022	7.39126	0.105
7.61835	1.172	7.54406	-0.418	7.63753	-1.31		7.6191	-0.159	7.6191	0.168	7.54406	-0.418		7.2345	0.054	7.6191	-0.114	7.4191	-0.036		6.73019	-0.527	6.92449	-0.037	6.85813	-0.01		7.6191	2.287	7.23481	0.231	7.61969	-0.423		7.42368	0.044	7.4223	0.021	7.42368	0.102
7.65161	1.179	7.57701	-0.415	7.67088	-1.307		7.65237	-0.161	7.65237	0.168	7.57701	-0.415		7.2661	0.054	7.65237	-0.106	7.4515	-0.035		6.75958	-0.514	6.95473	-0.039	6.88808	-0.006		7.65237	2.293	7.26641	0.237	7.65297	-0.419		7.4561	0.045	7.45471	0.02	7.4561	0.101
7.68488	1.183	7.60995	-0.407	7.70423	-1.301		7.68565	-0.162	7.68565	0.168	7.60995	-0.407		7.29769	0.056	7.68565	-0.103	7.4839	-0.035		6.78897	-0.514	6.98497	-0.042	6.91803	0		7.68565	2.295	7.298	0.238	7.68624	-0.419		7.48852	0.045	7.48712	0.021	7.48852	0.102
7.71815	1.189	7.64289	-0.397	7.73759	-1.299		7.71892	-0.166	7.71892	0.168	7.64289	-0.397		7.32928	0.059	7.71892	-0.097	7.51629	-0.037		6.81836	-0.496	7.01521	-0.043	6.94798	0.007		7.71892	2.295	7.32959	0.236	7.71951	-0.418		7.52093	0.046	7.51953	0.022	7.52093	0.101
7.75142	1.198	7.67584	-0.394	7.77094	-1.296		7.75219	-0.168	7.75219	0.17	7.67584	-0.394		7.36087	0.061	7.75219	-0.1	7.54869	-0.038		6.84775	-0.496	7.04545	-0.041	6.97792	0.011		7.75219	2.294	7.36118	0.238	7.75279	-0.419		7.55335	0.045	7.55194	0.023	7.55335	0.102
7.78469	1.209	7.70878	-0.387	7.80429	-1.295		7.78546	-0.168	7.78546	0.172	7.70878	-0.387		7.39246	0.064	7.78546	-0.099	7.58109	-0.039		6.87714	-0.491	7.07568	-0.038	7.00787	0.014		7.78546	2.291	7.39278	0.239	7.78606	-0.423		7.58577	0.045	7.58435	0.023	7.58577	0.102
7.81795	1.219	7.74172	-0.384	7.83764	-1.293		7.81873	-0.167	7.81873	0.17	7.74172	-0.384		7.42406	0.067	7.81873	-0.099	7.61349	-0.037		6.90653	-0.491	7.10592	-0.038	7.03782	0.022		7.81873	2.292	7.42437	0.245	7.81934	-0.422		7.61819	0.043	7.61677	0.022	7.61819	0.098
7.85122	1.225	7.77467	-0.385	7.87099	-1.287		7.852	-0.161	7.852	0.171	7.77467	-0.385		7.45565	0.07	7.852	-0.096	7.64589	-0.036		6.93592	-0.478	7.13616	-0.038	7.06777	0.029		7.852	2.289	7.45596	0.248	7.85261	-0.421		7.6506	0.04	7.64918	0.022	7.6506	0.1
7.88449	1.234	7.80761	-0.387	7.90434	-1.284		7.88527	-0.162	7.88527	0.169	7.80761	-0.387		7.48724	0.073	7.88527	-0.09	7.67828	-0.031		6.96531	-0.478	7.1664	-0.039	7.09772	0.032		7.88527	2.291	7.48756	0.249	7.88588	-0.418		7.68302	0.042	7.68159	0.024	7.68302	0.099
7.91776	1.242	7.84055	-0.386	7.9377	-1.283		7.91854	-0.165	7.91854	0.168	7.84055	-0.386		7.51883	0.075	7.91854	-0.084	7.71068	-0.03		6.9947	-0.467	7.19664	-0.039	7.12767	0.037		7.91854	2.295	7.51915	0.247	7.91916	-0.415		7.71544	0.044	7.714	0.024	7.71544	0.098
7.95102	1.246	7.8735	-0.379	7.97105	-1.282		7.95181	-0.162	7.95181	0.167	7.8735	-0.379		7.55042	0.076	7.95181	-0.084	7.74308	-0.029		7.02409	-0.467	7.22687	-0.038	7.15761	0.048		7.95181	2.298	7.55074	0.249	7.95243	-0.41		7.74786	0.043	7.74641	0.024	7.74786	0.102
7.98429	1.248	7.90644	-0.37	8.0044	-1.278		7.98509	-0.159	7.98509	0.168	7.90644	-0.37		7.58201	0.082	7.98509	-0.081	7.77548	-0.03		7.05348	-0.457	7.25711	-0.036	7.18756	0.055		7.98509	2.299	7.58234	0.251	7.9857	-0.408		7.78028	0.043	7.77882	0.026	7.78028	0.1
8.01756	1.253	7.93938	-0.364	8.03775	-1.27		8.01836	-0.16	8.01836	0.167	7.93938	-0.364		7.61361	0.088	8.01836	-0.08	7.80787	-0.035		7.08287	-0.457	7.28735	-0.035	7.21751	0.063		8.01836	2.301	7.61393	0.256	8.01898	-0.408		7.81269	0.042	7.81124	0.024	7.81269	0.1
8.05083	1.257	7.97233	-0.35	8.0711	-1.267		8.05163	-0.16	8.05163	0.162	7.97233	-0.35		7.6452	0.092	8.05163	-0.077	7.84027	-0.033		7.11225	-0.447	7.31759	-0.033	7.24746	0.062		8.05163	2.31	7.64552	0.258	8.05225	-0.405		7.84511	0.041	7.84365	0.025	7.84511	0.101
8.0841	1.261	8.00527	-0.342	8.10445	-1.263		8.0849	-0.157	8.0849	0.16	8.00527	-0.342		7.67679	0.094	8.0849	-0.075	7.87267	-0.03		7.14164	-0.447	7.34783	-0.035	7.27741	0.073		8.0849	2.315	7.67712	0.262	8.08553	-0.401		7.87753	0.041	7.87606	0.027	7.87753	0.099
8.11736	1.263	8.03821	-0.336	8.13781	-1.262		8.11817	-0.159	8.11817	0.156	8.03821	-0.336		7.70838	0.097	8.11817	-0.076	7.90507	-0.027		7.17103	-0.438	7.37806	-0.036	7.30735	0.085		8.11817	2.315	7.70871	0.265	8.1188	-0.403		7.90995	0.042	7.90847	0.029	7.90995	0.097
8.15063	1.268	8.07116	-0.337	8.17116	-1.258		8.15144	-0.158	8.15144	0.153	8.07116	-0.337		7.73997	0.099	8.15144	-0.072	7.93747	-0.028		7.20042	-0.438	7.4083	-0.036	7.3373	0.094		8.15144	2.31	7.7403	0.266	8.15207	-0.401		7.94236	0.043	7.94088	0.031	7.94236	0.098
8.1839	1.275	8.1041	-0.325	8.20451	-1.258		8.18471	-0.165	8.18471	0.145	8.1041	-0.325		7.77156	0.104	8.18471	-0.07	7.96986	-0.028		7.22981	-0.433	7.43854	-0.035	7.36725	0.096		8.18471	2.306	7.77189	0.269	8.18535	-0.402		7.97478	0.045	7.9733	0.033	7.97478	0.095
8.21717	1.281	8.13704	-0.323	8.23786	-1.254		8.21798	-0.16	8.21798	0.136	8.13704	-0.323		7.80316	0.104	8.21798	-0.065	8.00226	-0.029		7.2592	-0.433	7.46878	-0.035	7.3972	0.101		8.21798	2.31	7.80349	0.272	8.21862	-0.399		8.0072	0.049	8.00571	0.03	8.0072	0.092
8.25044	1.286	8.16999	-0.32	8.27121	-1.251		8.25126	-0.157	8.25126	0.135	8.16999	-0.32		7.83475	0.107	8.25126	-0.059	8.03466	-0.028		7.28859	-0.422	7.49901	-0.035	7.42715	0.108		8.25126	2.313	7.83508	0.275	8.25189	-0.403		8.03962	0.052	8.03812	0.033	8.03962	0.091
8.2837	1.292	8.20293	-0.316	8.30456	-1.241		8.28453	-0.155	8.28453	0.133	8.20293	-0.316		7.86634	0.11	8.28453	-0.054	8.06706	-0.023		7.31798	-0.422	7.52925	-0.038	7.4571	0.118		8.28453	2.319	7.86667	0.274	8.28517	-0.399		8.07204	0.053	8.07053	0.032	8.07204	0.089
8.31697	1.297	8.23588	-0.313	8.33792	-1.235		8.3178	-0.154	8.3178	0.126	8.23588	-0.313		7.89793	0.11	8.3178	-0.053	8.09945	-0.024		7.34737	-0.414	7.55949	-0.038	7.48704	0.124		8.3178	2.321	7.89827	0.275	8.31844	-0.398		8.10445	0.052	8.10294	0.031	8.10445	0.084
8.35024	1.3	8.26882	-0.304	8.37127	-1.232		8.35107	-0.153	8.35107	0.12	8.26882	-0.304		7.92952	0.112	8.35107	-0.054	8.13185	-0.024		7.37676	-0.414	7.58973	-0.037	7.51699	0.129		8.35107	2.324	7.92986	0.279	8.35172	-0.395		8.13687	0.052	8.13535	0.031	8.13687	0.085
8.38351	1.308	8.30176	-0.303	8.40462	-1.231		8.38434	-0.151	8.38434	0.109	8.30176	-0.303		7.96111	0.115	8.38434	-0.05	8.16425	-0.022		7.40615	-0.405	7.61997	-0.036	7.54694	0.131		8.38434	2.324	7.96145	0.284	8.38499	-0.398		8.16929	0.051	8.16777	0.028	8.16929	0.082
8.41678	1.319	8.33471	-0.297	8.43797	-1.229		8.41761	-0.149	8.41761	0.104	8.33471	-0.297		7.99271	0.123	8.41761	-0.043	8.19665	-0.026		7.43554	-0.405	7.6502	-0.036	7.57689	0.133		8.41761	2.326	7.99305	0.291	8.41826	-0.401		8.20171	0.052	8.20018	0.028	8.20171	0.08
8.45004	1.329	8.36765	-0.289	8.47132	-1.225		8.45088	-0.151	8.45088	0.101	8.36765	-0.289		8.0243	0.131	8.45088	-0.042	8.22905	-0.022		7.46493	-0.395	7.68044	-0.031	7.60684	0.13		8.45088	2.332	8.02464	0.293	8.45154	-0.407		8.23413	0.053	8.23259	0.027	8.23413	0.081
8.48331	1.333	8.40059	-0.28	8.50467	-1.217		8.48415	-0.151	8.48415	0.099	8.40059	-0.28		8.05589	0.133	8.48415	-0.038	8.26144	-0.018		7.49432	-0.395	7.71068	-0.03	7.63678	0.129		8.48415	2.333	8.05623	0.292	8.48481	-0.403		8.26654	0.051	8.265	0.024	8.26654	0.078
8.51658	1.334	8.43354	-0.273	8.53803	-1.21		8.51743	-0.149	8.51743	0.099	8.43354	-0.273		8.08748	0.139	8.51743	-0.038	8.29384	-0.01		7.52371	-0.384	7.74092	-0.029	7.66673	0.12		8.51743	2.334	8.08783	0.291	8.51808	-0.397		8.29896	0.049	8.29741	0.024	8.29896	0.076
8.54985	1.339	8.46648	-0.272	8.57138	-1.204		8.5507	-0.143	8.5507	0.101	8.46648	-0.272		8.11907	0.144	8.5507	-0.037	8.32624	0.004		7.5531	-0.384	7.77116	-0.029	7.69668	0.114		8.5507	2.33	8.11942	0.292	8.55136	-0.397		8.33138	0.047	8.32982	0.022	8.33138	0.077
8.58311	1.342	8.49942	-0.271	8.60473	-1.202		8.58397	-0.138	8.58397	0.1	8.49942	-0.271		8.15066	0.156	8.58397	-0.035	8.35864	0.019		7.58249	-0.37	7.80139	-0.035	7.72663	0.104		8.58397	2.335	8.15101	0.298	8.58463	-0.397		8.3638	0.045	8.36224	0.021	8.3638	0.075
8.61638	1.352	8.53237	-0.269	8.63808	-1.195		8.61724	-0.142	8.61724	0.095	8.53237	-0.269		8.18226	0.166	8.61724	-0.035	8.39103	0.041		7.61188	-0.37	7.83163	-0.035	7.75658	0.103		8.61724	2.337	8.1826	0.302	8.61791	-0.392		8.39621	0.044	8.39465	0.021	8.39621	0.076
8.64965	1.359	8.56531	-0.261	8.67143	-1.196		8.65051	-0.142	8.65051	0.087	8.56531	-0.261		8.21385	0.188	8.65051	-0.033	8.42343	0.067		7.64127	-0.361	7.86187	-0.032	7.78653	0.097		8.65051	2.338	8.2142	0.304	8.65118	-0.39		8.42863	0.042	8.42706	0.02	8.42863	0.074
8.68292	1.367	8.59825	-0.256	8.70478	-1.19		8.68378	-0.147	8.68378	0.079	8.59825	-0.256		8.24544	0.223	8.68378	-0.031	8.45583	0.1		7.67065	-0.361	7.89211	-0.029	7.81647	0.093		8.68378	2.336	8.24579	0.31	8.68445	-0.386		8.46105	0.042	8.45947	0.02	8.46105	0.073
8.71619	1.372	8.6312	-0.252	8.73814	-1.184		8.71705	-0.145	8.71705	0.073	8.6312	-0.252		8.27703	0.26	8.71705	-0.027	8.48823	0.133		7.70004	-0.354	7.92235	-0.026	7.84642	0.086		8.71705	2.337	8.27738	0.312	8.71773	-0.386		8.49347	0.042	8.49188	0.021	8.49347	0.072
8.74945	1.374	8.66414	-0.249	8.77149	-1.177		8.75032	-0.143	8.75032	0.066	8.66414	-0.249		8.30862	0.295	8.75032	-0.021	8.52063	0.163		7.72943	-0.354	7.95258	-0.029	7.87637	0.08		8.75032	2.341	8.30898	0.316	8.751	-0.389		8.52589	0.04	8.5243	0.021	8.52589	0.07
8.78272	1.379	8.69708	-0.243	8.80484	-1.17		8.78359	-0.137	8.78359	0.059	8.69708	-0.243		8.34022	0.331	8.78359	-0.019	8.55302	0.185		7.75882	-0.353	7.98282	-0.027	7.90632	0.071		8.78359	2.338	8.34057	0.318	8.78427	-0.389		8.5583	0.04	8.55671	0.02	8.5583	0.067
8.81599	1.386	8.73003	-0.241	8.83819	-1.168		8.81687	-0.135	8.81687	0.056	8.73003	-0.241		8.37181	0.376	8.81687	-0.017	8.58542	0.205		7.78821	-0.353	8.01306	-0.029	7.93627	0.066		8.81687	2.343	8.37216	0.321	8.81755	-0.388		8.59072	0.04	8.58912	0.018	8.59072	0.065
8.84926	1.39	8.76297	-0.237	8.87154	-1.168		8.85014	-0.136	8.85014	0.054	8.76297	-0.237		8.4034	0.422	8.85014	-0.018	8.61782	0.223		7.8176	-0.342	8.0433	-0.028	7.96621	0.058		8.85014	2.346	8.40376	0.322	8.85082	-0.384		8.62314	0.037	8.62153	0.016	8.62314	0.064
8.88253	1.389	8.79591	-0.231	8.90489	-1.168		8.88341	-0.137	8.88341	0.051	8.79591	-0.231		8.43499	0.466	8.88341	-0.016	8.65022	0.231		7.84699	-0.342	8.07354	-0.023	7.99616	0.05		8.88341	2.349	8.43535	0.325	8.8841	-0.377		8.65556	0.037	8.65394	0.017	8.65556	0.06
8.91579	1.391	8.82886	-0.23	8.93824	-1.158		8.91668	-0.138	8.91668	0.045	8.82886	-0.23		8.46658	0.505	8.91668	-0.016	8.68262	0.239		7.87638	-0.325	8.10377	-0.024	8.02611	0.046		8.91668	2.35	8.46694	0.329	8.91737	-0.371		8.68797	0.035	8.68635	0.016	8.68797	0.06
8.94906	1.393	8.8618	-0.233	8.9716	-1.149		8.94995	-0.136	8.94995	0.04	8.8618	-0.233		8.49817	0.544	8.94995	-0.015	8.71501	0.237		7.90577	-0.325	8.13401	-0.024	8.05606	0.047		8.94995	2.348	8.49854	0.337	8.95064	-0.37		8.72039	0.03	8.71877	0.014	8.72039	0.06
8.98233	1.394	8.89475	-0.233	9.00495	-1.141		8.98322	-0.13	8.98322	0.037	8.89475	-0.233		8.52977	0.581	8.98322	-0.016	8.74741	0.234		7.93516	-0.32	8.16425	-0.022	8.08601	0.044		8.98322	2.35	8.53013	0.341	8.98392	-0.371		8.75281	0.03	8.75118	0.012	8.75281	0.058
9.0156	1.397	8.92769	-0.231	9.0383	-1.138		9.01649	-0.127	9.01649	0.036	8.92769	-0.231		8.56136	0.616	9.01649	-0.014	8.77981	0.225		7.96455	-0.32	8.19449	-0.026	8.11596	0.044		9.01649	2.348	8.56172	0.338	9.01719	-0.371		8.78523	0.026	8.78359	0.01	8.78523	0.06
9.04886	1.395	8.96063	-0.23	9.07165	-1.138		9.04976	-0.125	9.04976	0.033	8.96063	-0.23		8.59295	0.65	9.04976	-0.012	8.81221	0.21		7.99394	-0.311	8.22473	-0.023	8.1459	0.042		9.04976	2.352	8.59331	0.339	9.05046	-0.369		8.81765	0.023	8.816	0.007	8.81765	0.059
9.08213	1.392	8.99358	-0.225	9.105	-1.14		9.08304	-0.127	9.08304	0.03	8.99358	-0.225		8.62454	0.688	9.08304	-0.009	8.8446	0.2		8.02333	-0.311	8.25496	-0.019	8.17585	0.051		9.08304	2.359	8.62491	0.339	9.08374	-0.368		8.85006	0.021	8.84841	0.008	8.85006	0.058
9.1154	1.391	9.02652	-0.223	9.13835	-1.136		9.11631	-0.124	9.11631	0.022	9.02652	-0.223		8.65613	0.721	9.11631	-0.006	8.877	0.183		8.05272	-0.3	8.2852	-0.013	8.2058	0.049		9.11631	2.359	8.6565	0.344	9.11701	-0.369		8.88248	0.02	8.88082	0.007	8.88248	0.056
9.14867	1.391	9.05946	-0.224	9.17171	-1.133		9.14958	-0.123	9.14958	0.019	9.05946	-0.224		8.68772	0.758	9.14958	-0.003	8.9094	0.169		8.08211	-0.3	8.31544	-0.001	8.23575	0.052		9.14958	2.359	8.68809	0.346	9.15029	-0.368		8.9149	0.02	8.91324	0.005	8.9149	0.055
9.18194	1.392	9.09241	-0.219	9.20506	-1.125		9.18285	-0.122	9.18285	0.019	9.09241	-0.219		8.71932	0.783	9.18285	-0.005	8.9418	0.155		8.1115	-0.289	8.34568	0.014	8.2657	0.05		9.18285	2.359	8.71969	0.346	9.18356	-0.367		8.94732	0.021	8.94565	0.006	8.94732	0.057
9.2152	1.395	9.12535	-0.211	9.23841	-1.121		9.21612	-0.121	9.21612	0.013	9.12535	-0.211		8.75091	0.797	9.21612	-0.008	8.9742	0.142		8.14089	-0.289	8.37592	0.029	8.29564	0.058		9.21612	2.363	8.75128	0.353	9.21683	-0.366		8.97973	0.019	8.97806	0.004	8.97973	0.056
9.24847	1.395	9.15829	-0.207	9.27176	-1.114		9.24939	-0.12	9.24939	0.005	9.15829	-0.207		8.7825	0.795	9.24939	-0.009	9.00659	0.126		8.17028	-0.286	8.40615	0.054	8.32559	0.054		9.24939	2.366	8.78287	0.354	9.25011	-0.37		9.01215	0.018	9.01047	0	9.01215	0.055
9.28174	1.397	9.19124	-0.206	9.30511	-1.11		9.28266	-0.116	9.28266	0.003	9.19124	-0.206		8.81409	0.795	9.28266	-0.005	9.03899	0.115		8.19967	-0.286	8.43639	0.081	8.35554	0.058		9.28266	2.366	8.81447	0.357	9.28338	-0.37		9.04457	0.017	9.04288	-0.002	9.04457	0.054
9.31501	1.394	9.22418	-0.207	9.33846	-1.108		9.31593	-0.111	9.31593	0.005	9.22418	-0.207		8.84568	0.8	9.31593	0.004	9.07139	0.105		8.22905	-0.288	8.46663	0.108	8.38549	0.059		9.31593	2.363	8.84606	0.357	9.31665	-0.369		9.07699	0.014	9.0753	-0.006	9.07699	0.05
9.34828	1.391	9.25712	-0.204	9.37182	-1.105		9.3492	-0.104	9.3492	0.007	9.25712	-0.204		8.87727	0.8	9.3492	0.003	9.10379	0.094		8.25844	-0.288	8.49687	0.14	8.41544	0.064		9.3492	2.363	8.87765	0.358	9.34993	-0.364		9.10941	0.012	9.10771	-0.008	9.10941	0.048
9.38154	1.387	9.29007	-0.206	9.40517	-1.102		9.38248	-0.103	9.38248	0.003	9.29007	-0.206		8.90887	0.798	9.38248	0.005	9.13618	0.087		8.28783	-0.288	8.52711	0.168	8.44539	0.063		9.38248	2.366	8.90924	0.36	9.3832	-0.36		9.14182	0.012	9.14012	-0.009	9.14182	0.048
9.41481	1.387	9.32301	-0.203	9.43852	-1.097		9.41575	-0.105	9.41575	0.003	9.32301	-0.203		8.94046	0.793	9.41575	0.002	9.16858	0.077		8.31722	-0.288	8.55734	0.189	8.47533	0.063		9.41575	2.372	8.94084	0.357	9.41648	-0.356		9.17424	0.008	9.17253	-0.01	9.17424	0.05
9.44808	1.384	9.35595	-0.202	9.47187	-1.09		9.44902	-0.102	9.44902	0	9.35595	-0.202		8.97205	0.786	9.44902	0.007	9.20098	0.073		8.34661	-0.278	8.58758	0.207	8.50528	0.06		9.44902	2.376	8.97243	0.352	9.44975	-0.354		9.20666	0.008	9.20494	-0.01	9.20666	0.051
9.48135	1.375	9.3889	-0.202	9.50522	-1.082		9.48229	-0.1	9.48229	0	9.3889	-0.202		9.00364	0.775	9.48229	0.007	9.23338	0.065		8.376	-0.278	8.61782	0.223	8.53523	0.058		9.48229	2.378	9.00402	0.352	9.48302	-0.355		9.23908	0.009	9.23735	-0.014	9.23908	0.049
9.51462	1.369	9.42184	-0.201	9.53857	-1.076		9.51556	-0.094	9.51556	-0.003	9.42184	-0.201		9.03523	0.764	9.51556	0.004	9.26578	0.058		8.40539	-0.27	8.64806	0.231	8.56518	0.054		9.51556	2.38	9.03562	0.358	9.5163	-0.36		9.2715	0.008	9.26977	-0.017	9.2715	0.05
9.54788	1.367	9.45478	-0.203	9.57193	-1.071		9.54883	-0.094	9.54883	-0.002	9.45478	-0.203		9.06682	0.754	9.54883	0	9.29817	0.054		8.43478	-0.27	8.6783	0.239	8.59513	0.048		9.54883	2.383	9.06721	0.359	9.54957	-0.363		9.30391	0.005	9.30218	-0.019	9.30391	0.05
9.58115	1.364	9.48773	-0.204	9.60528	-1.067		9.5821	-0.089	9.5821	-0.002	9.48773	-0.204		9.09842	0.746	9.5821	0	9.33057	0.048		8.46417	-0.254	8.70853	0.239	8.62507	0.047		9.5821	2.385	9.0988	0.358	9.58284	-0.361		9.33633	0.005	9.33459	-0.025	9.33633	0.047
9.61442	1.363	9.52067	-0.202	9.63863	-1.062		9.61537	-0.089	9.61537	-0.004	9.52067	-0.202		9.13001	0.735	9.61537	-0.002	9.36297	0.043		8.49356	-0.254	8.73877	0.235	8.65502	0.052		9.61537	2.391	9.1304	0.354	9.61612	-0.359		9.36875	0	9.367	-0.024	9.36875	0.049
9.64769	1.355	9.55362	-0.201	9.67198	-1.061		9.64865	-0.087	9.64865	-0.008	9.55362	-0.201		9.1616	0.726	9.64865	-0.005	9.39537	0.042		8.52295	-0.224	8.76901	0.229	8.68497	0.055		9.64865	2.394	9.16199	0.353	9.64939	-0.353		9.40117	0	9.39941	-0.026	9.40117	0.048
9.68095	1.355	9.58656	-0.203	9.70533	-1.061		9.68192	-0.09	9.68192	-0.011	9.58656	-0.203		9.19319	0.716	9.68192	-0.009	9.42777	0.035		8.55234	-0.224	8.79925	0.215	8.71492	0.053		9.68192	2.395	9.19358	0.349	9.68267	-0.352		9.43358	0	9.43183	-0.026	9.43358	0.048
9.71422	1.346	9.6195	-0.2	9.73868	-1.055		9.71519	-0.089	9.71519	-0.014	9.6195	-0.2		9.22478	0.705	9.71519	-0.009	9.46016	0.029		8.58173	-0.197	8.82949	0.206	8.74487	0.054		9.71519	2.396	9.22518	0.348	9.71594	-0.354		9.466	0.002	9.46424	-0.026	9.466	0.051
9.74749	1.339	9.65245	-0.192	9.77204	-1.041		9.74846	-0.089	9.74846	-0.017	9.65245	-0.192		9.25638	0.69	9.74846	-0.01	9.49256	0.026		8.61112	-0.197	8.85972	0.192	8.77482	0.053		9.74846	2.4	9.25677	0.346	9.74921	-0.352		9.49842	0.005	9.49665	-0.028	9.49842	0.052
9.78076	1.33	9.68539	-0.186	9.80539	-1.032		9.78173	-0.087	9.78173	-0.02	9.68539	-0.186		9.28797	0.682	9.78173	-0.01	9.52496	0.019		8.64051	-0.181	8.88996	0.178	8.80476	0.049		9.78173	2.404	9.28836	0.342	9.78249	-0.354		9.53084	0.005	9.52906	-0.029	9.53084	0.055
9.81403	1.324	9.71833	-0.186	9.83874	-1.03		9.815	-0.082	9.815	-0.016	9.71833	-0.186		9.31956	0.673	9.815	-0.009	9.55736	0.019		8.6699	-0.181	8.9202	0.166	8.83471	0.049		9.815	2.405	9.31995	0.335	9.81576	-0.352		9.56326	0.006	9.56147	-0.032	9.56326	0.055
9.84729	1.318	9.75128	-0.183	9.87209	-1.026		9.84827	-0.079	9.84827	-0.015	9.75128	-0.183		9.35115	0.664	9.84827	-0.012	9.58975	0.016		8.69929	-0.167	8.95044	0.149	8.86466	0.053		9.84827	2.404	9.35155	0.331	9.84904	-0.352		9.59567	0.005	9.59388	-0.031	9.59567	0.055
9.88056	1.307	9.78422	-0.177	9.90544	-1.019		9.88154	-0.075	9.88154	-0.013	9.78422	-0.177		9.38274	0.65	9.88154	-0.011	9.62215	0.011		8.72868	-0.167	8.98068	0.139	8.89461	0.055		9.88154	2.4	9.38314	0.328	9.88231	-0.35		9.62809	0.005	9.6263	-0.029	9.62809	0.055
9.91383	1.298	9.81716	-0.173	9.93879	-1.013		9.91482	-0.076	9.91482	-0.018	9.81716	-0.173		9.41433	0.636	9.91482	-0.014	9.65455	0.011		8.75807	-0.15	9.01091	0.124	8.92456	0.056		9.91482	2.4	9.41473	0.329	9.91558	-0.35		9.66051	0.003	9.65871	-0.032	9.66051	0.055
9.9471	1.291	9.85011	-0.175	9.97215	-1.009		9.94809	-0.074	9.94809	-0.016	9.85011	-0.175		9.44593	0.63	9.94809	-0.012	9.68695	0.006		8.78746	-0.15	9.04115	0.114	8.9545	0.054		9.94809	2.402	9.44633	0.326	9.94886	-0.352		9.69293	0.001	9.69112	-0.029	9.69293	0.053
9.98037	1.286	9.88305	-0.174	10.0055	-1.002		9.98136	-0.072	9.98136	-0.015	9.88305	-0.174		9.47752	0.623	9.98136	-0.014	9.71935	0.005		8.81684	-0.15	9.07139	0.105	8.98445	0.055		9.98136	2.406	9.47792	0.321	9.98213	-0.355		9.72534	0.002	9.72353	-0.029	9.72534	0.054
10.0136	1.282	9.91599	-0.173	10.0389	-0.994		10.0146	-0.07	10.0146	-0.013	9.91599	-0.173		9.50911	0.614	10.0146	-0.018	9.75174	0.004		8.84623	-0.15	9.10163	0.094	9.0144	0.05		10.0146	2.409	9.50951	0.315	10.0154	-0.359		9.75776	0	9.75594	-0.033	9.75776	0.054
10.0469	1.275	9.94894	-0.167	10.0722	-0.984		10.0479	-0.067	10.0479	-0.016	9.94894	-0.167		9.5407	0.606	10.0479	-0.017	9.78414	0.003		8.87562	-0.148	9.13186	0.088	9.04435	0.049		10.0479	2.415	9.54111	0.312	10.0487	-0.36		9.79018	0.002	9.78835	-0.033	9.79018	0.055
10.0802	1.267	9.98188	-0.169	10.1055	-0.978		10.0812	-0.07	10.0812	-0.018	9.98188	-0.169		9.57229	0.596	10.0812	-0.013	9.81654	0.008		8.90501	-0.148	9.1621	0.081	9.0743	0.048		10.0812	2.417	9.5727	0.31	10.082	-0.359		9.8226	0.005	9.82077	-0.034	9.8226	0.053
10.1134	1.258	10.0148	-0.173	10.1389	-0.974		10.1144	-0.068	10.1144	-0.016	10.0148	-0.173		9.60388	0.588	10.1144	-0.013	9.84894	0.012		8.9344	-0.14	9.19234	0.074	9.10425	0.053		10.1144	2.419	9.60429	0.307	10.1152	-0.359		9.85502	0.003	9.85318	-0.038	9.85502	0.052
10.1467	1.253	10.0478	-0.176	10.1723	-0.975		10.1477	-0.066	10.1477	-0.015	10.0478	-0.176		9.63548	0.58	10.1477	-0.011	9.88133	0.011		8.96379	-0.14	9.22258	0.068	9.13419	0.054		10.1477	2.416	9.63589	0.304	10.1485	-0.358		9.88743	0.001	9.88559	-0.038	9.88743	0.052
10.18	1.242	10.0807	-0.176	10.2056	-0.97		10.181	-0.059	10.181	-0.016	10.0807	-0.176		9.66707	0.575	10.181	-0.008	9.91373	0.013		8.99318	-0.14	9.25282	0.062	9.16414	0.059		10.181	2.416	9.66748	0.299	10.1818	-0.357		9.91985	0	9.918	-0.038	9.91985	0.053
10.2132	1.232	10.1136	-0.173	10.239	-0.965		10.2143	-0.059	10.2143	-0.015	10.1136	-0.173		9.69866	0.567	10.2143	-0.011	9.94613	0.014		9.02257	-0.14	9.28305	0.055	9.19409	0.055		10.2143	2.416	9.69907	0.296	10.215	-0.357		9.95227	0	9.95041	-0.043	9.95227	0.054
10.2465	1.221	10.1466	-0.172	10.2723	-0.96		10.2475	-0.059	10.2475	-0.014	10.1466	-0.172		9.73025	0.56	10.2475	-0.014	9.97853	0.016		9.05196	-0.152	9.31329	0.051	9.22404	0.053		10.2475	2.417	9.73066	0.293	10.2483	-0.357		9.98469	-0.001	9.98283	-0.043	9.98469	0.055
10.2798	1.218	10.1795	-0.169	10.3057	-0.953		10.2808	-0.062	10.2808	-0.014	10.1795	-0.169		9.76184	0.555	10.2808	-0.016	10.0109	0.018		9.08135	-0.152	9.34353	0.046	9.25399	0.053		10.2808	2.42	9.76226	0.291	10.2816	-0.358		10.0171	-0.001	10.0152	-0.039	10.0171	0.056
10.313	1.217	10.2125	-0.167	10.339	-0.944		10.3141	-0.06	10.3141	-0.019	10.2125	-0.167		9.79343	0.552	10.3141	-0.017	10.0433	0.017		9.11074	-0.151	9.37377	0.041	9.28393	0.056		10.3141	2.422	9.79385	0.286	10.3149	-0.359		10.0495	-0.001	10.0477	-0.037	10.0495	0.058
10.3463	1.212	10.2454	-0.162	10.3724	-0.939		10.3473	-0.059	10.3473	-0.015	10.2454	-0.162		9.82503	0.547	10.3473	-0.018	10.0757	0.017		9.14013	-0.151	9.40401	0.042	9.31388	0.06		10.3473	2.422	9.82544	0.282	10.3481	-0.36		10.0819	-0.003	10.0801	-0.035	10.0819	0.059
10.3796	1.202	10.2784	-0.159	10.4057	-0.94		10.3806	-0.055	10.3806	-0.011	10.2784	-0.159		9.85662	0.544	10.3806	-0.02	10.1081	0.019		9.16952	-0.16	9.43424	0.034	9.34383	0.06		10.3806	2.423	9.85704	0.278	10.3814	-0.361		10.1144	-0.004	10.1125	-0.036	10.1144	0.058
10.4129	1.197	10.3113	-0.158	10.4391	-0.942		10.4139	-0.051	10.4139	-0.008	10.3113	-0.158		9.88821	0.539	10.4139	-0.02	10.1405	0.022		9.19891	-0.16	9.46448	0.028	9.37378	0.059		10.4139	2.425	9.88863	0.273	10.4147	-0.361		10.1468	-0.005	10.1449	-0.037	10.1468	0.061
10.4461	1.193	10.3443	-0.154	10.4724	-0.943		10.4472	-0.047	10.4472	-0.007	10.3443	-0.154		9.9198	0.532	10.4472	-0.019	10.1729	0.024		9.2283	-0.156	9.49472	0.025	9.40373	0.057		10.4472	2.43	9.92022	0.272	10.448	-0.364		10.1792	-0.004	10.1773	-0.04	10.1792	0.061
10.4794	1.189	10.3772	-0.157	10.5058	-0.938		10.4804	-0.049	10.4804	-0.008	10.3772	-0.157		9.95139	0.526	10.4804	-0.019	10.2053	0.023		9.25769	-0.156	9.52496	0.019	9.43368	0.054		10.4804	2.429	9.95182	0.27	10.4812	-0.366		10.2116	-0.005	10.2097	-0.04	10.2116	0.064
10.5127	1.183	10.4101	-0.163	10.5391	-0.937		10.5137	-0.046	10.5137	-0.007	10.4101	-0.163		9.98298	0.523	10.5137	-0.02	10.2377	0.024		9.28708	-0.154	9.5552	0.019	9.46362	0.053		10.5137	2.425	9.98341	0.264	10.5145	-0.366		10.244	-0.006	10.2421	-0.037	10.244	0.066
10.5459	1.179	10.4431	-0.165	10.5725	-0.934		10.547	-0.048	10.547	-0.009	10.4431	-0.165		10.0146	0.523	10.547	-0.017	10.2701	0.024		9.31647	-0.154	9.58543	0.017	9.49357	0.055		10.547	2.427	10.015	0.26	10.5478	-0.368		10.2765	-0.006	10.2745	-0.037	10.2765	0.066
10.5792	1.178	10.476	-0.159	10.6058	-0.938		10.5802	-0.048	10.5802	-0.01	10.476	-0.159		10.0462	0.517	10.5802	-0.019	10.3025	0.022		9.34586	-0.153	9.61567	0.012	9.52352	0.055		10.5802	2.43	10.0466	0.256	10.5811	-0.368		10.3089	-0.007	10.3069	-0.039	10.3089	0.066
10.6125	1.178	10.509	-0.158	10.6392	-0.937		10.6135	-0.049	10.6135	-0.01	10.509	-0.158		10.0778	0.513	10.6135	-0.018	10.3349	0.023		9.37524	-0.153	9.64591	0.012	9.55347	0.052		10.6135	2.432	10.0782	0.257	10.6143	-0.371		10.3413	-0.005	10.3393	-0.039	10.3413	0.061
10.6457	1.174	10.5419	-0.157	10.6725	-0.938		10.6468	-0.047	10.6468	-0.014	10.5419	-0.157		10.1093	0.511	10.6468	-0.016	10.3673	0.022		9.40463	-0.153	9.67615	0.008	9.58342	0.051		10.6468	2.435	10.1098	0.254	10.6476	-0.367		10.3737	-0.005	10.3718	-0.039	10.3737	0.061
10.679	1.169	10.5749	-0.153	10.7059	-0.936		10.68	-0.048	10.68	-0.013	10.5749	-0.153		10.1409	0.51	10.68	-0.011	10.3997	0.021		9.43402	-0.153	9.70639	0.006	9.61336	0.048		10.68	2.441	10.1414	0.251	10.6809	-0.367		10.4061	-0.005	10.4042	-0.04	10.4061	0.062
10.7123	1.165	10.6078	-0.146	10.7392	-0.933		10.7133	-0.046	10.7133	-0.014	10.6078	-0.146		10.1725	0.506	10.7133	-0.015	10.4321	0.021		9.46341	-0.148	9.73662	0.005	9.64331	0.05		10.7133	2.44	10.173	0.246	10.7142	-0.365		10.4385	-0.006	10.4366	-0.039	10.4385	0.061
10.7455	1.161	10.6408	-0.143	10.7726	-0.929		10.7466	-0.044	10.7466	-0.011	10.6408	-0.143		10.2041	0.501	10.7466	-0.021	10.4645	0.019		9.4928	-0.148	9.76686	0.003	9.67326	0.054		10.7466	2.441	10.2046	0.246	10.7474	-0.372		10.471	-0.007	10.469	-0.039	10.471	0.065
10.7788	1.159	10.6737	-0.144	10.8059	-0.928		10.7799	-0.046	10.7799	-0.009	10.6737	-0.144		10.2357	0.496	10.7799	-0.023	10.4969	0.019		9.52219	-0.144	9.7971	0.004	9.70321	0.059		10.7799	2.438	10.2362	0.247	10.7807	-0.376		10.5034	-0.006	10.5014	-0.039	10.5034	0.065
10.8121	1.162	10.7066	-0.146	10.8393	-0.929		10.8131	-0.047	10.8131	-0.004	10.7066	-0.146		10.2673	0.493	10.8131	-0.023	10.5293	0.023		9.55158	-0.144	9.82734	0.01	9.73316	0.06		10.8131	2.446	10.2677	0.244	10.814	-0.38		10.5358	-0.005	10.5338	-0.038	10.5358	0.065
10.8453	1.161	10.7396	-0.145	10.8726	-0.932		10.8464	-0.048	10.8464	-0.004	10.7396	-0.145		10.2989	0.494	10.8464	-0.022	10.5617	0.026		9.58097	-0.142	9.85758	0.011	9.76311	0.063		10.8464	2.445	10.2993	0.237	10.8473	-0.38		10.5682	-0.005	10.5662	-0.04	10.5682	0.068
10.8786	1.162	10.7725	-0.143	10.906	-0.929		10.8797	-0.046	10.8797	-0.003	10.7725	-0.143		10.3305	0.492	10.8797	-0.021	10.5941	0.031		9.61036	-0.142	9.88781	0.013	9.79305	0.063		10.8797	2.449	10.3309	0.232	10.8805	-0.379		10.6006	-0.004	10.5986	-0.041	10.6006	0.07
10.9119	1.157	10.8055	-0.142	10.9393	-0.929		10.913	-0.046	10.913	0	10.8055	-0.142		10.3621	0.488	10.913	-0.023	10.6265	0.037		9.63975	-0.137	9.91805	0.014	9.823	0.063		10.913	2.452	10.3625	0.228	10.9138	-0.375		10.633	-0.003	10.6311	-0.041	10.633	0.069
10.9451	1.162	10.8384	-0.139	10.9727	-0.928		10.9462	-0.049	10.9462	0	10.8384	-0.139		10.3937	0.481	10.9462	-0.024	10.6589	0.037		9.66914	-0.137	9.94829	0.014	9.85295	0.062		10.9462	2.453	10.3941	0.226	10.9471	-0.377		10.6655	-0.003	10.6635	-0.045	10.6655	0.071
10.9784	1.164	10.8714	-0.138	11.0061	-0.927		10.9795	-0.045	10.9795	0.001	10.8714	-0.138		10.4253	0.476	10.9795	-0.026	10.6913	0.042		9.69853	-0.134	9.97853	0.016	9.8829	0.063		10.9795	2.454	10.4257	0.216	10.9803	-0.381		10.6979	-0.003	10.6959	-0.046	10.6979	0.073
11.0117	1.162	10.9043	-0.134	11.0394	-0.926		11.0128	-0.048	11.0128	0.004	10.9043	-0.134		10.4569	0.475	11.0128	-0.027	10.7237	0.041		9.72792	-0.134	10.0088	0.018	9.91285	0.061		11.0128	2.451	10.4573	0.208	11.0136	-0.384		10.7303	0	10.7283	-0.042	10.7303	0.072
11.0449	1.164	10.9372	-0.134	11.0727	-0.925		11.046	-0.048	11.046	0.008	10.9372	-0.134		10.4885	0.477	11.046	-0.024	10.7561	0.042		9.75731	-0.132	10.039	0.017	9.94279	0.06		11.046	2.454	10.4889	0.205	11.0469	-0.382		10.7627	0	10.7607	-0.043	10.7627	0.071
11.0782	1.164	10.9702	-0.138	11.1061	-0.926		11.0793	-0.047	11.0793	0.005	10.9702	-0.138		10.52	0.477	11.0793	-0.02	10.7885	0.046		9.7867	-0.132	10.0692	0.016	9.97274	0.061		11.0793	2.454	10.5205	0.204	11.0802	-0.381		10.7951	0	10.7931	-0.04	10.7951	0.072
11.1115	1.167	11.0031	-0.14	11.1395	-0.923		11.1126	-0.045	11.1126	0.006	11.0031	-0.14		10.5516	0.474	11.1126	-0.02	10.8209	0.045		9.81609	-0.122	10.0995	0.02	10.0027	0.062		11.1126	2.456	10.5521	0.202	11.1134	-0.383		10.8276	0	10.8255	-0.039	10.8276	0.07
11.1447	1.167	11.0361	-0.135	11.1728	-0.918		11.1458	-0.041	11.1458	0.008	11.0361	-0.135		10.5832	0.469	11.1458	-0.02	10.8533	0.048		9.84548	-0.122	10.1297	0.022	10.0326	0.059		11.1458	2.458	10.5837	0.195	11.1467	-0.388		10.86	-0.001	10.8579	-0.04	10.86	0.07
11.178	1.165	11.069	-0.135	11.2062	-0.914		11.1791	-0.041	11.1791	0.009	11.069	-0.135		10.6148	0.469	11.1791	-0.021	10.8857	0.047		9.87487	-0.118	10.16	0.023	10.0626	0.06		11.1791	2.456	10.6153	0.187	11.18	-0.389		10.8924	-0.001	10.8903	-0.04	10.8924	0.071
11.2113	1.166	11.102	-0.135	11.2395	-0.913		11.2124	-0.041	11.2124	0.011	11.102	-0.135		10.6464	0.467	11.2124	-0.022	10.9181	0.045		9.90426	-0.118	10.1902	0.024	10.0925	0.06		11.2124	2.46	10.6469	0.182	11.2133	-0.39		10.9248	0	10.9228	-0.039	10.9248	0.072
11.2446	1.167	11.1349	-0.138	11.2729	-0.909		11.2457	-0.044	11.2457	0.012	11.1349	-0.138		10.678	0.464	11.2457	-0.022	10.9505	0.05		9.93364	-0.117	10.2204	0.022	10.1225	0.059		11.2457	2.46	10.6785	0.176	11.2465	-0.389		10.9572	-0.001	10.9552	-0.039	10.9572	0.075
11.2778	1.17	11.1678	-0.138	11.3062	-0.901		11.2789	-0.046	11.2789	0.011	11.1678	-0.138		10.7096	0.461	11.2789	-0.02	10.9829	0.051		9.96303	-0.117	10.2507	0.022	10.1524	0.055		11.2789	2.464	10.7101	0.173	11.2798	-0.39		10.9896	-0.003	10.9876	-0.04	10.9896	0.078
11.3111	1.175	11.2008	-0.139	11.3396	-0.894		11.3122	-0.046	11.3122	0.008	11.2008	-0.139		10.7412	0.458	11.3122	-0.02	11.0153	0.055		9.99242	-0.116	10.2809	0.024	10.1824	0.06		11.3122	2.46	10.7416	0.169	11.3131	-0.392		11.0221	-0.004	11.02	-0.039	11.0221	0.08
11.3444	1.181	11.2337	-0.144	11.3729	-0.887		11.3455	-0.046	11.3455	0.013	11.2337	-0.144		10.7728	0.453	11.3455	-0.017	11.0477	0.058		10.0218	-0.116	10.3111	0.022	10.2123	0.061		11.3455	2.461	10.7732	0.172	11.3463	-0.393		11.0545	-0.007	11.0524	-0.042	11.0545	0.081
11.3776	1.185	11.2667	-0.151	11.4063	-0.878		11.3788	-0.043	11.3788	0.014	11.2667	-0.151		10.8044	0.449	11.3788	-0.019	11.08	0.06		10.0512	-0.106	10.3414	0.023	10.2423	0.061		11.3788	2.462	10.8048	0.176	11.3796	-0.392		11.0869	-0.007	11.0848	-0.041	11.0869	0.082
11.4109	1.187	11.2996	-0.157	11.4396	-0.871		11.412	-0.04	11.412	0.018	11.2996	-0.157		10.836	0.444	11.412	-0.019	11.1125	0.064		10.0806	-0.106	10.3716	0.022	10.2722	0.056		11.412	2.465	10.8364	0.18	11.4129	-0.391		11.1193	-0.006	11.1172	-0.043	11.1193	0.08
11.4442	1.192	11.3326	-0.159	11.473	-0.861		11.4453	-0.036	11.4453	0.021	11.3326	-0.159		10.8675	0.442	11.4453	-0.016	11.1448	0.066		10.11	-0.101	10.4019	0.021	10.3022	0.056		11.4453	2.465	10.868	0.179	11.4462	-0.39		11.1517	-0.006	11.1496	-0.043	11.1517	0.078
11.4774	1.195	11.3655	-0.166	11.5063	-0.853		11.4786	-0.035	11.4786	0.021	11.3655	-0.166		10.8991	0.441	11.4786	-0.016	11.1773	0.065		10.1394	-0.101	10.4321	0.021	10.3321	0.057		11.4786	2.467	10.8996	0.172	11.4794	-0.388		11.1842	-0.005	11.1821	-0.044	11.1842	0.075
11.5107	1.2	11.3985	-0.178	11.5397	-0.84		11.5118	-0.034	11.5118	0.018	11.3985	-0.178		10.9307	0.442	11.5118	-0.015	11.2096	0.068		10.1688	-0.099	10.4623	0.019	10.3621	0.062		11.5118	2.466	10.9312	0.166	11.5127	-0.385		11.2166	-0.005	11.2145	-0.046	11.2166	0.074
11.544	1.204	11.4314	-0.179	11.573	-0.831		11.5451	-0.033	11.5451	0.018	11.4314	-0.179		10.9623	0.437	11.5451	-0.018	11.242	0.069		10.1982	-0.099	10.4926	0.019	10.392	0.063		11.5451	2.464	10.9628	0.159	11.546	-0.384		11.249	-0.005	11.2469	-0.047	11.249	0.074
11.5772	1.214	11.4643	-0.177	11.6064	-0.817		11.5784	-0.032	11.5784	0.023	11.4643	-0.177		10.9939	0.433	11.5784	-0.02	11.2744	0.069		10.2275	-0.088	10.5228	0.022	10.422	0.064		11.5784	2.46	10.9944	0.154	11.5793	-0.385		11.2814	-0.003	11.2793	-0.048	11.2814	0.078
11.6105	1.224	11.4973	-0.176	11.6397	-0.797		11.6116	-0.032	11.6116	0.025	11.4973	-0.176		11.0255	0.434	11.6116	-0.016	11.3068	0.07		10.2569	-0.088	10.5531	0.024	10.4519	0.061		11.6116	2.459	11.026	0.148	11.6125	-0.386		11.3138	-0.003	11.3117	-0.047	11.3138	0.079
11.6438	1.237	11.5302	-0.182	11.6731	-0.771		11.6449	-0.034	11.6449	0.028	11.5302	-0.182		11.0571	0.43	11.6449	-0.015	11.3392	0.071		10.2863	-0.082	10.5833	0.031	10.4819	0.061		11.6449	2.46	11.0576	0.146	11.6458	-0.383		11.3462	-0.002	11.3441	-0.043	11.3462	0.082
11.677	1.251	11.5632	-0.19	11.7064	-0.739		11.6782	-0.036	11.6782	0.032	11.5632	-0.19		11.0887	0.429	11.6782	-0.01	11.3716	0.069		10.3157	-0.082	10.6135	0.033	10.5118	0.065		11.6782	2.46	11.0892	0.146	11.6791	-0.379		11.3787	-0.002	11.3765	-0.04	11.3787	0.081
11.7103	1.272	11.5961	-0.199	11.7398	-0.702		11.7115	-0.038	11.7115	0.036	11.5961	-0.199		11.1203	0.427	11.7115	-0.009	11.404	0.072		10.3451	-0.076	10.6438	0.037	10.5418	0.063		11.7115	2.457	11.1208	0.146	11.7124	-0.38		11.4111	-0.003	11.4089	-0.038	11.4111	0.082
11.7436	1.297	11.6291	-0.206	11.7731	-0.662		11.7447	-0.032	11.7447	0.038	11.6291	-0.206		11.1519	0.43	11.7447	-0.005	11.4364	0.071		10.3745	-0.076	10.674	0.038	10.5717	0.063		11.7447	2.452	11.1524	0.144	11.7456	-0.383		11.4435	-0.002	11.4413	-0.037	11.4435	0.085
11.7768	1.327	11.662	-0.216	11.8065	-0.617		11.778	-0.03	11.778	0.04	11.662	-0.216		11.1835	0.431	11.778	-0.003	11.4688	0.069		10.4039	-0.074	10.7042	0.041	10.6016	0.066		11.778	2.45	11.1839	0.142	11.7789	-0.386		11.4759	-0.001	11.4738	-0.04	11.4759	0.085
11.8101	1.355	11.6949	-0.223	11.8398	-0.566		11.8113	-0.027	11.8113	0.038	11.6949	-0.223		11.2151	0.429	11.8113	0.005	11.5012	0.068		10.4333	-0.074	10.7345	0.042	10.6316	0.069		11.8113	2.444	11.2155	0.132	11.8122	-0.384		11.5083	0.001	11.5062	-0.042	11.5083	0.087
11.8434	1.398	11.7279	-0.231	11.8732	-0.506		11.8445	-0.03	11.8445	0.041	11.7279	-0.231		11.2467	0.426	11.8445	0.01	11.5336	0.072		10.4627	-0.064	10.7647	0.043	10.6616	0.064		11.8445	2.438	11.2471	0.133	11.8455	-0.386		11.5407	0.004	11.5386	-0.042	11.5407	0.087
11.8766	1.445	11.7608	-0.235	11.9065	-0.443		11.8778	-0.027	11.8778	0.044	11.7608	-0.235		11.2782	0.424	11.8778	0.013	11.566	0.075		10.492	-0.064	10.795	0.047	10.6915	0.06		11.8778	2.429	11.2787	0.131	11.8787	-0.384		11.5732	0.003	11.571	-0.044	11.5732	0.085
11.9099	1.5	11.7938	-0.242	11.9399	-0.371		11.9111	-0.024	11.9111	0.049	11.7938	-0.242		11.3098	0.419	11.9111	0.008	11.5984	0.077		10.5214	-0.055	10.8252	0.046	10.7215	0.063		11.9111	2.428	11.3103	0.131	11.912	-0.381		11.6056	0.002	11.6034	-0.043	11.6056	0.087
11.9432	1.556	11.8267	-0.246	11.9733	-0.29		11.9444	-0.018	11.9444	0.054	11.8267	-0.246		11.3414	0.418	11.9444	0.006	11.6308	0.079		10.5508	-0.055	10.8554	0.049	10.7514	0.063		11.9444	2.423	11.3419	0.131	11.9453	-0.377		11.638	0	11.6358	-0.041	11.638	0.091
11.9764	1.62	11.8597	-0.255	12.0066	-0.202		11.9776	-0.014	11.9776	0.059	11.8597	-0.255		11.373	0.418	11.9776	0.01	11.6632	0.076		10.5802	-0.053	10.8857	0.047	10.7813	0.061		11.9776	2.418	11.3735	0.13	11.9786	-0.377		11.6704	0	11.6682	-0.043	11.6704	0.092
12.0097	1.688	11.8926	-0.267	12.0399	-0.114		12.0109	-0.01	12.0109	0.064	11.8926	-0.267		11.4046	0.418	12.0109	0.015	11.6956	0.075		10.6096	-0.053	10.9159	0.045	10.8113	0.061		12.0109	2.412	11.4051	0.131	12.0118	-0.378		11.7028	0	11.7006	-0.044	11.7028	0.092
12.043	1.766	11.9255	-0.279	12.0733	-0.03		12.0442	-0.006	12.0442	0.072	11.9255	-0.279		11.4362	0.423	12.0442	0.02	11.728	0.075		10.639	-0.051	10.9461	0.049	10.8412	0.058		12.0442	2.405	11.4367	0.129	12.0451	-0.376		11.7353	0	11.7331	-0.042	11.7353	0.094
12.0762	1.843	11.9585	-0.288	12.1067	0.057		12.0774	0.001	12.0774	0.078	11.9585	-0.288		11.4678	0.423	12.0774	0.024	11.7604	0.074		10.6684	-0.051	10.9764	0.05	10.8712	0.054		12.0774	2.398	11.4683	0.132	12.0784	-0.374		11.7677	0	11.7655	-0.047	11.7677	0.095
12.1095	1.927	11.9914	-0.297	12.14	0.135		12.1107	0.008	12.1107	0.088	11.9914	-0.297		11.4994	0.418	12.1107	0.026	11.7928	0.074		10.6978	-0.043	11.0066	0.054	10.9011	0.055		12.1107	2.392	11.4999	0.133	12.1116	-0.371		11.8001	0.001	11.7979	-0.045	11.8001	0.094
12.1428	2.005	12.0244	-0.302	12.1734	0.219		12.144	0.017	12.144	0.093	12.0244	-0.302		11.531	0.413	12.144	0.028	11.8252	0.077		10.7272	-0.043	11.0369	0.057	10.9311	0.056		12.144	2.383	11.5315	0.133	12.1449	-0.37		11.8325	0.004	11.8303	-0.041	11.8325	0.095
12.1761	2.085	12.0573	-0.312	12.2067	0.296		12.1773	0.026	12.1773	0.1	12.0573	-0.312		11.5626	0.413	12.1773	0.028	11.8576	0.078		10.7566	-0.032	11.0671	0.059	10.961	0.06		12.1773	2.376	11.5631	0.136	12.1782	-0.369		11.8649	0.006	11.8627	-0.041	11.8649	0.098
12.2093	2.158	12.0903	-0.324	12.2401	0.372		12.2105	0.034	12.2105	0.107	12.0903	-0.324		11.5942	0.417	12.2105	0.03	11.89	0.081		10.7859	-0.032	11.0973	0.062	10.991	0.059		12.2105	2.364	11.5947	0.137	12.2115	-0.37		11.8973	0.007	11.8951	-0.038	11.8973	0.102
12.2426	2.236	12.1232	-0.332	12.2734	0.441		12.2438	0.041	12.2438	0.12	12.1232	-0.332		11.6258	0.419	12.2438	0.033	11.9224	0.079		10.8153	-0.03	11.1276	0.065	11.0209	0.062		12.2438	2.355	11.6263	0.138	12.2447	-0.371		11.9298	0.008	11.9275	-0.036	11.9298	0.103
12.2759	2.305	12.1562	-0.34	12.3068	0.513		12.2771	0.045	12.2771	0.129	12.1562	-0.34		11.6573	0.418	12.2771	0.034	11.9548	0.078		10.8447	-0.03	11.1578	0.067	11.0509	0.062		12.2771	2.348	11.6578	0.139	12.278	-0.374		11.9622	0.009	11.9599	-0.038	11.9622	0.103
12.3091	2.37	12.1891	-0.35	12.3401	0.573		12.3103	0.05	12.3103	0.134	12.1891	-0.35		11.6889	0.421	12.3103	0.036	11.9872	0.079		10.8741	-0.023	11.1881	0.068	11.0808	0.065		12.3103	2.34	11.6894	0.136	12.3113	-0.369		11.9946	0.009	11.9924	-0.039	11.9946	0.103
12.3424	2.426	12.222	-0.357	12.3735	0.625		12.3436	0.054	12.3436	0.138	12.222	-0.357		11.7205	0.42	12.3436	0.035	12.0196	0.075		10.9035	-0.023	11.2183	0.069	11.1108	0.07		12.3436	2.332	11.721	0.14	12.3446	-0.368		12.027	0.01	12.0248	-0.038	12.027	0.102
12.3757	2.481	12.255	-0.367	12.4068	0.662		12.3769	0.062	12.3769	0.143	12.255	-0.367		11.7521	0.42	12.3769	0.038	12.052	0.075		10.9329	-0.017	11.2485	0.07	11.1407	0.069		12.3769	2.323	11.7526	0.144	12.3778	-0.362		12.0594	0.01	12.0572	-0.041	12.0594	0.102
12.4089	2.524	12.2879	-0.373	12.4402	0.699		12.4101	0.071	12.4101	0.148	12.2879	-0.373		11.7837	0.418	12.4101	0.041	12.0844	0.07		10.9623	-0.017	11.2788	0.069	11.1707	0.068		12.4101	2.316	11.7842	0.148	12.4111	-0.362		12.0919	0.014	12.0896	-0.041	12.0919	0.102
12.4422	2.564	12.3209	-0.377	12.4735	0.729		12.4434	0.08	12.4434	0.154	12.3209	-0.377		11.8153	0.414	12.4434	0.042	12.1168	0.072		10.9917	-0.01	11.309	0.07	11.2006	0.062		12.4434	2.305	11.8158	0.146	12.4444	-0.358		12.1243	0.013	12.122	-0.039	12.1243	0.102
12.4755	2.593	12.3538	-0.383	12.5069	0.756		12.4767	0.088	12.4767	0.162	12.3538	-0.383		11.8469	0.412	12.4767	0.044	12.1492	0.073		11.0211	-0.01	11.3392	0.071	11.2306	0.067		12.4767	2.296	11.8474	0.15	12.4777	-0.358		12.1567	0.012	12.1544	-0.038	12.1567	0.102
12.5087	2.623	12.3868	-0.389	12.5402	0.775		12.51	0.092	12.51	0.171	12.3868	-0.389		11.8785	0.412	12.51	0.047	12.1816	0.076		11.0504	-0.003	11.3695	0.069	11.2605	0.068		12.51	2.29	11.879	0.153	12.5109	-0.358		12.1891	0.013	12.1868	-0.041	12.1891	0.103
12.542	2.645	12.4197	-0.393	12.5736	0.788		12.5432	0.091	12.5432	0.177	12.4197	-0.393		11.9101	0.41	12.5432	0.053	12.214	0.075		11.0798	-0.003	11.3997	0.072	11.2905	0.068		12.5432	2.283	11.9106	0.161	12.5442	-0.355		12.2215	0.012	12.2192	-0.04	12.2215	0.105
12.5753	2.662	12.4526	-0.397	12.6069	0.799		12.5765	0.09	12.5765	0.176	12.4526	-0.397		11.9417	0.412	12.5765	0.052	12.2464	0.069		11.1092	0.004	11.4299	0.071	11.3204	0.067		12.5765	2.276	11.9422	0.168	12.5775	-0.354		12.2539	0.01	12.2516	-0.04	12.2539	0.105
12.6085	2.673	12.4856	-0.401	12.6403	0.808		12.6098	0.088	12.6098	0.176	12.4856	-0.401		11.9733	0.413	12.6098	0.052	12.2788	0.067		11.1386	0.004	11.4602	0.069	11.3504	0.065		12.6098	2.274	11.9738	0.174	12.6108	-0.352		12.2864	0.011	12.2841	-0.042	12.2864	0.108
12.6418	2.678	12.5185	-0.405	12.6736	0.817		12.6431	0.092	12.6431	0.177	12.5185	-0.405		12.0048	0.416	12.6431	0.05	12.3112	0.065		11.168	0.016	11.4904	0.069	11.3803	0.068		12.6431	2.275	12.0054	0.177	12.644	-0.352		12.3188	0.012	12.3165	-0.041	12.3188	0.108
12.6751	2.678	12.5515	-0.411	12.707	0.822		12.6763	0.096	12.6763	0.183	12.5515	-0.411		12.0365	0.415	12.6763	0.051	12.3436	0.069		11.1974	0.016	11.5207	0.069	11.4102	0.068		12.6763	2.273	12.037	0.18	12.6773	-0.351		12.3512	0.012	12.3489	-0.037	12.3512	0.11
12.7083	2.679	12.5844	-0.42	12.7403	0.822		12.7096	0.1	12.7096	0.185	12.5844	-0.42		12.068	0.413	12.7096	0.053	12.376	0.073		11.2268	0.02	11.5509	0.072	11.4402	0.068		12.7096	2.269	12.0686	0.187	12.7106	-0.347		12.3836	0.011	12.3813	-0.036	12.3836	0.109
12.7416	2.679	12.6174	-0.424	12.7737	0.824		12.7429	0.104	12.7429	0.189	12.6174	-0.424		12.0996	0.416	12.7429	0.055	12.4084	0.071		11.2562	0.02	11.5811	0.077	11.4702	0.068		12.7429	2.264	12.1001	0.192	12.7439	-0.343		12.416	0.009	12.4137	-0.035	12.416	0.109
12.7749	2.685	12.6503	-0.431	12.807	0.831		12.7761	0.104	12.7761	0.187	12.6503	-0.431		12.1312	0.422	12.7761	0.055	12.4408	0.066		11.2856	0.023	11.6114	0.077	11.5001	0.067		12.7761	2.26	12.1317	0.2	12.7771	-0.338		12.4484	0.008	12.4461	-0.03	12.4484	0.111
12.8081	2.691	12.6832	-0.434	12.8404	0.841		12.8094	0.104	12.8094	0.192	12.6832	-0.434		12.1628	0.425	12.8094	0.056	12.4732	0.064		11.3149	0.023	11.6416	0.076	11.53	0.065		12.8094	2.258	12.1633	0.205	12.8104	-0.334		12.4809	0.007	12.4785	-0.029	12.4809	0.11
12.8414	2.705	12.7162	-0.434	12.8737	0.86		12.8427	0.107	12.8427	0.19	12.7162	-0.434		12.1944	0.423	12.8427	0.056	12.5056	0.062		11.3443	0.03	11.6718	0.077	11.56	0.061		12.8427	2.253	12.1949	0.209	12.8437	-0.33		12.5133	0.008	12.5109	-0.03	12.5133	0.111
12.8747	2.722	12.7491	-0.439	12.9071	0.878		12.8759	0.109	12.8759	0.192	12.7491	-0.439		12.226	0.422	12.8759	0.06	12.538	0.065		11.3737	0.03	11.7021	0.075	11.5899	0.064		12.8759	2.247	12.2265	0.213	12.877	-0.33		12.5457	0.011	12.5434	-0.029	12.5457	0.114
12.9079	2.737	12.7821	-0.443	12.9404	0.902		12.9092	0.112	12.9092	0.198	12.7821	-0.443		12.2576	0.429	12.9092	0.062	12.5703	0.068		11.4031	0.042	11.7323	0.074	11.6199	0.064		12.9092	2.241	12.2581	0.218	12.9102	-0.329		12.5781	0.016	12.5758	-0.029	12.5781	0.113
12.9412	2.76	12.815	-0.449	12.9738	0.925		12.9425	0.113	12.9425	0.203	12.815	-0.449		12.2892	0.43	12.9425	0.069	12.6028	0.069		11.4325	0.042	11.7626	0.074	11.6498	0.066		12.9425	2.24	12.2897	0.226	12.9435	-0.327		12.6105	0.017	12.6082	-0.031	12.6105	0.115
12.9745	2.787	12.848	-0.455	13.0071	0.955		12.9758	0.116	12.9758	0.204	12.848	-0.455		12.3208	0.432	12.9758	0.076	12.6351	0.066		11.4619	0.046	11.7928	0.074	11.6798	0.064		12.9758	2.238	12.3213	0.23	12.9768	-0.322		12.643	0.018	12.6406	-0.03	12.643	0.12
13.0077	2.831	12.8809	-0.459	13.0405	0.985		13.009	0.122	13.009	0.203	12.8809	-0.459		12.3524	0.432	13.009	0.083	12.6676	0.062		11.4913	0.046	11.823	0.077	11.7097	0.068		13.009	2.235	12.3529	0.234	13.01	-0.321		12.6754	0.016	12.673	-0.031	12.6754	0.121
13.041	2.87	12.9139	-0.456	13.0739	1.021		13.0423	0.127	13.0423	0.208	12.9139	-0.456		12.384	0.436	13.0423	0.086	12.6999	0.06		11.5207	0.053	11.8533	0.077	11.7397	0.066		13.0423	2.231	12.3845	0.233	13.0433	-0.321		12.7078	0.017	12.7054	-0.03	12.7078	0.123
13.0743	2.924	12.9468	-0.453	13.1072	1.074		13.0756	0.135	13.0756	0.214	12.9468	-0.453		12.4155	0.44	13.0756	0.092	12.7323	0.058		11.5501	0.053	11.8835	0.081	11.7696	0.068		13.0756	2.231	12.4161	0.233	13.0766	-0.318		12.7402	0.018	12.7378	-0.03	12.7402	0.124
13.1075	2.986	12.9797	-0.451	13.1405	1.133		13.1089	0.144	13.1089	0.222	12.9797	-0.451		12.4471	0.441	13.1089	0.1	12.7647	0.059		11.5795	0.052	11.9138	0.079	11.7996	0.063		13.1089	2.232	12.4477	0.236	13.1099	-0.316		12.7726	0.02	12.7702	-0.03	12.7726	0.123
13.1408	3.072	13.0127	-0.457	13.1739	1.199		13.1421	0.148	13.1421	0.229	13.0127	-0.457		12.4787	0.44	13.1421	0.105	12.7971	0.064		11.6089	0.052	11.944	0.077	11.8295	0.058		13.1421	2.233	12.4793	0.236	13.1431	-0.312		12.805	0.024	12.8026	-0.03	12.805	0.124
13.1741	3.173	13.0456	-0.457	13.2073	1.267		13.1754	0.157	13.1754	0.239	13.0456	-0.457		12.5103	0.443	13.1754	0.114	12.8295	0.066		11.6382	0.065	11.9742	0.079	11.8595	0.05		13.1754	2.233	12.5108	0.237	13.1764	-0.309		12.8375	0.026	12.8351	-0.03	12.8375	0.129
13.2073	3.308	13.0786	-0.455	13.2406	1.35		13.2087	0.164	13.2087	0.246	13.0786	-0.455		12.5419	0.446	13.2087	0.125	12.8619	0.065		11.6676	0.065	12.0045	0.076	11.8894	0.05		13.2087	2.228	12.5425	0.236	13.2097	-0.307		12.8699	0.032	12.8675	-0.031	12.8699	0.13
13.2406	3.464	13.1115	-0.454	13.274	1.442		13.2419	0.182	13.2419	0.257	13.1115	-0.454		12.5735	0.45	13.2419	0.142	12.8943	0.065		11.697	0.07	12.0347	0.076	11.9194	0.053		13.2419	2.228	12.574	0.235	13.243	-0.304		12.9023	0.035	12.8999	-0.029	12.9023	0.133
13.2739	3.678	13.1445	-0.457	13.3073	1.551		13.2752	0.197	13.2752	0.273	13.1445	-0.457		12.6051	0.452	13.2752	0.164	12.9267	0.063		11.7264	0.07	12.0649	0.072	11.9493	0.051		13.2752	2.227	12.6056	0.236	13.2762	-0.299		12.9347	0.04	12.9323	-0.028	12.9347	0.139
13.3072	3.962	13.1774	-0.46	13.3407	1.681		13.3085	0.213	13.3085	0.295	13.1774	-0.46		12.6367	0.452	13.3085	0.178	12.9591	0.061		11.7558	0.063	12.0952	0.071	11.9793	0.054		13.3085	2.224	12.6372	0.231	13.3095	-0.293		12.9671	0.045	12.9647	-0.025	12.9671	0.144
13.3404	4.37	13.2103	-0.464	13.374	1.835		13.3417	0.228	13.3417	0.32	13.2103	-0.464		12.6683	0.455	13.3417	0.197	12.9915	0.059		11.7852	0.063	12.1254	0.072	12.0092	0.052		13.3417	2.22	12.6688	0.229	13.3428	-0.29		12.9995	0.053	12.9971	-0.022	12.9995	0.149
13.3737	4.963	13.2433	-0.462	13.4074	2.022		13.375	0.249	13.375	0.338	13.2433	-0.462		12.6999	0.457	13.375	0.209	13.0239	0.057		11.8146	0.072	12.1557	0.074	12.0392	0.055		13.375	2.221	12.7004	0.219	13.376	-0.291		13.032	0.058	13.0295	-0.021	13.032	0.152
13.407	5.814	13.2762	-0.464	13.4407	2.243		13.4083	0.271	13.4083	0.361	13.2762	-0.464		12.7315	0.46	13.4083	0.23	13.0563	0.056		11.844	0.072	12.1859	0.075	12.0691	0.052		13.4083	2.222	12.732	0.218	13.4093	-0.29		13.0644	0.068	13.0619	-0.019	13.0644	0.152
13.4402	6.965	13.3092	-0.465	13.4741	2.53		13.4416	0.301	13.4416	0.388	13.3092	-0.465		12.7631	0.462	13.4416	0.25	13.0887	0.061		11.8734	0.08	12.2161	0.074	12.0991	0.054		13.4416	2.221	12.7636	0.214	13.4426	-0.291		13.0968	0.076	13.0944	-0.016	13.0968	0.154
13.4735	8.64	13.3421	-0.467	13.5074	2.886		13.4748	0.331	13.4748	0.421	13.3421	-0.467		12.7947	0.464	13.4748	0.272	13.1211	0.064		11.9027	0.08	12.2464	0.069	12.129	0.056		13.4748	2.221	12.7952	0.213	13.4759	-0.288		13.1292	0.081	13.1268	-0.018	13.1292	0.152
13.5068	10.746	13.3751	-0.468	13.5408	3.345		13.5081	0.365	13.5081	0.461	13.3751	-0.468		12.8262	0.466	13.5081	0.292	13.1535	0.067		11.9321	0.081	12.2766	0.068	12.159	0.057		13.5081	2.224	12.8268	0.211	13.5091	-0.279		13.1616	0.089	13.1592	-0.017	13.1616	0.154
13.54	13.56	13.408	-0.466	13.5741	3.945		13.5414	0.402	13.5414	0.503	13.408	-0.466		12.8578	0.472	13.5414	0.316	13.1859	0.069		11.9615	0.081	12.3069	0.065	12.1889	0.058		13.5414	2.225	12.8584	0.205	13.5424	-0.277		13.1941	0.097	13.1916	-0.015	13.1941	0.158
13.5733	16.82	13.441	-0.47	13.6075	4.721		13.5747	0.442	13.5747	0.556	13.441	-0.47		12.8894	0.479	13.5747	0.338	13.2183	0.066		11.9909	0.083	12.3371	0.068	12.2189	0.058		13.5747	2.225	12.89	0.198	13.5757	-0.272		13.2265	0.103	13.224	-0.014	13.2265	0.161
13.6066	20.652	13.4739	-0.469	13.6408	5.709		13.6079	0.489	13.6079	0.612	13.4739	-0.469		12.921	0.484	13.6079	0.364	13.2507	0.068		12.0203	0.083	12.3673	0.072	12.2488	0.053		13.6079	2.226	12.9216	0.191	13.609	-0.271		13.2589	0.115	13.2564	-0.013	13.2589	0.166
13.6398	24.777	13.5068	-0.463	13.6742	6.953		13.6412	0.537	13.6412	0.675	13.5068	-0.463		12.9526	0.489	13.6412	0.39	13.2831	0.065		12.0497	0.088	12.3976	0.072	12.2788	0.051		13.6412	2.226	12.9532	0.183	13.6422	-0.268		13.2913	0.12	13.2888	-0.011	13.2913	0.169
13.6731	28.968	13.5398	-0.456	13.7075	8.431		13.6745	0.589	13.6745	0.738	13.5398	-0.456		12.9842	0.493	13.6745	0.418	13.3155	0.064		12.0791	0.088	12.4278	0.067	12.3087	0.052		13.6745	2.23	12.9848	0.178	13.6755	-0.27		13.3237	0.127	13.3212	-0.007	13.3237	0.172
13.7064	33.013	13.5727	-0.453	13.7409	10.289		13.7077	0.636	13.7077	0.807	13.5727	-0.453		13.0158	0.497	13.7077	0.446	13.3479	0.062		12.1085	0.096	12.458	0.066	12.3386	0.053		13.7077	2.228	13.0163	0.169	13.7088	-0.266		13.3561	0.135	13.3537	-0.007	13.3561	0.177
13.7396	36.8	13.6057	-0.448	13.7742	12.371		13.741	0.685	13.741	0.878	13.6057	-0.448		13.0474	0.504	13.741	0.469	13.3803	0.059		12.1379	0.096	12.4883	0.063	12.3686	0.05		13.741	2.229	13.0479	0.16	13.7421	-0.265		13.3886	0.142	13.3861	-0.002	13.3886	0.178
13.7729	39.9	13.6386	-0.447	13.8076	14.781		13.7743	0.738	13.7743	0.952	13.6386	-0.447		13.079	0.51	13.7743	0.497	13.4127	0.062		12.1672	0.097	12.5185	0.063	12.3985	0.052		13.7743	2.229	13.0795	0.148	13.7753	-0.259		13.421	0.146	13.4185	0.003	13.421	0.178
13.8062	42.483	13.6715	-0.45	13.8409	17.357		13.8075	0.787	13.8075	1.023	13.6715	-0.45		13.1106	0.527	13.8075	0.521	13.4451	0.062		12.1966	0.097	12.5488	0.067	12.4285	0.054		13.8075	2.237	13.1111	0.133	13.8086	-0.255		13.4534	0.152	13.4509	0.002	13.4534	0.18
13.8394	44.376	13.7045	-0.455	13.8743	20.061		13.8408	0.835	13.8408	1.095	13.7045	-0.455		13.1422	0.536	13.8408	0.548	13.4775	0.065		12.226	0.099	12.579	0.067	12.4584	0.053		13.8408	2.238	13.1427	0.119	13.8419	-0.25		13.4858	0.155	13.4833	0.004	13.4858	0.181
13.8727	45.643	13.7374	-0.453	13.9076	22.764		13.8741	0.876	13.8741	1.169	13.7374	-0.453		13.1738	0.546	13.8741	0.568	13.5099	0.061		12.2554	0.099	12.6092	0.069	12.4884	0.052		13.8741	2.243	13.1743	0.108	13.8752	-0.25		13.5182	0.155	13.5157	0.006	13.5182	0.181
13.906	46.319	13.7704	-0.446	13.941	25.356		13.9074	0.913	13.9074	1.24	13.7704	-0.446		13.2053	0.562	13.9074	0.588	13.5423	0.059		12.2848	0.105	12.6395	0.066	12.5183	0.05		13.9074	2.246	13.2059	0.103	13.9084	-0.247		13.5506	0.157	13.5481	0.009	13.5506	0.185
13.9392	46.472	13.8033	-0.44	13.9743	27.655		13.9406	0.943	13.9406	1.307	13.8033	-0.44		13.2369	0.584	13.9406	0.608	13.5747	0.054		12.3142	0.105	12.6697	0.062	12.5483	0.05		13.9406	2.248	13.2375	0.095	13.9417	-0.244		13.5831	0.159	13.5805	0.013	13.5831	0.19
13.9725	46.171	13.8363	-0.441	14.0077	29.686		13.9739	0.973	13.9739	1.372	13.8363	-0.441		13.2685	0.605	13.9739	0.631	13.6071	0.052		12.3436	0.117	12.6999	0.06	12.5782	0.048		13.9739	2.252	13.2691	0.083	13.975	-0.245		13.6155	0.161	13.6129	0.015	13.6155	0.196
14.0058	45.512	13.8692	-0.448	14.0411	31.184		14.0072	1.002	14.0072	1.435	13.8692	-0.448		13.3001	0.624	14.0072	0.65	13.6395	0.053		12.373	0.117	12.7302	0.057	12.6082	0.05		14.0072	2.256	13.3007	0.068	14.0083	-0.24		13.6479	0.164	13.6454	0.016	13.6479	0.201
14.039	44.544	13.9022	-0.45	14.0744	32.224		14.0404	1.023	14.0404	1.484	13.9022	-0.45		13.3317	0.642	14.0404	0.664	13.6719	0.054		12.4024	0.124	12.7604	0.06	12.6381	0.049		14.0404	2.263	13.3323	0.05	14.0415	-0.233		13.6803	0.168	13.6778	0.018	13.6803	0.21
14.0723	43.348	13.9351	-0.446	14.1077	32.791		14.0737	1.039	14.0737	1.523	13.9351	-0.446		13.3633	0.666	14.0737	0.681	13.7043	0.054		12.4317	0.124	12.7907	0.063	12.6681	0.048		14.0737	2.265	13.3639	0.034	14.0748	-0.229		13.7127	0.169	13.7102	0.019	13.7127	0.21
14.1056	41.931	13.968	-0.445	14.1411	32.864		14.107	1.052	14.107	1.561	13.968	-0.445		13.3949	0.686	14.107	0.702	13.7367	0.053		12.4611	0.116	12.8209	0.064	12.698	0.046		14.107	2.267	13.3955	0.02	14.1081	-0.224		13.7452	0.17	13.7426	0.02	13.7452	0.212
14.1388	40.347	14.001	-0.442	14.1745	32.472		14.1403	1.068	14.1403	1.596	14.001	-0.442		13.4265	0.709	14.1403	0.72	13.7691	0.05		12.4905	0.116	12.8511	0.065	12.728	0.045		14.1403	2.273	13.427	0.009	14.1413	-0.219		13.7776	0.171	13.775	0.022	13.7776	0.217
14.1721	38.671	14.0339	-0.441	14.2078	31.708		14.1735	1.075	14.1735	1.629	14.0339	-0.441		13.4581	0.738	14.1735	0.739	13.8015	0.046		12.5199	0.123	12.8814	0.064	12.7579	0.047		14.1735	2.28	13.4587	-0.009	14.1746	-0.211		13.81	0.172	13.8074	0.026	13.81	0.219
14.2054	37.005	14.0669	-0.44	14.2412	30.605		14.2068	1.085	14.2068	1.65	14.0669	-0.44		13.4897	0.769	14.2068	0.761	13.8339	0.045		12.5493	0.123	12.9116	0.063	12.7879	0.049		14.2068	2.284	13.4902	-0.024	14.2079	-0.203		13.8424	0.174	13.8398	0.027	13.8424	0.221
14.2387	35.227	14.0998	-0.436	14.2745	29.259		14.2401	1.091	14.2401	1.667	14.0998	-0.436		13.5213	0.796	14.2401	0.786	13.8663	0.045		12.5787	0.126	12.9419	0.062	12.8178	0.049		14.2401	2.291	13.5218	-0.044	14.2412	-0.197		13.8748	0.178	13.8722	0.028	13.8748	0.225
14.2719	33.514	14.1328	-0.434	14.3079	27.726		14.2733	1.099	14.2733	1.678	14.1328	-0.434		13.5528	0.824	14.2733	0.815	13.8987	0.046		12.6081	0.126	12.9721	0.06	12.8478	0.051		14.2733	2.3	13.5534	-0.061	14.2744	-0.194		13.9072	0.181	13.9047	0.028	13.9072	0.228
14.3052	31.776	14.1657	-0.43	14.3412	26.097		14.3066	1.106	14.3066	1.689	14.1657	-0.43		13.5844	0.854	14.3066	0.845	13.9311	0.044		12.6375	0.127	13.0023	0.057	12.8777	0.054		14.3066	2.307	13.585	-0.076	14.3077	-0.185		13.9397	0.184	13.9371	0.028	13.9397	0.229
14.3385	30.132	14.1987	-0.429	14.3746	24.393		14.3399	1.119	14.3399	1.701	14.1987	-0.429		13.616	0.885	14.3399	0.881	13.9635	0.04		12.6669	0.127	13.0326	0.057	12.9077	0.057		14.3399	2.316	13.6166	-0.094	14.341	-0.172		13.9721	0.187	13.9695	0.029	13.9721	0.231
14.3717	28.502	14.2316	-0.435	14.4079	22.745		14.3732	1.131	14.3732	1.713	14.2316	-0.435		13.6476	0.917	14.3732	0.922	13.9959	0.039		12.6963	0.141	13.0628	0.056	12.9376	0.052		14.3732	2.328	13.6482	-0.109	14.3743	-0.161		14.0045	0.193	14.0019	0.029	14.0045	0.233
14.405	26.931	14.2645	-0.44	14.4413	21.067		14.4064	1.144	14.4064	1.725	14.2645	-0.44		13.6792	0.951	14.4064	0.971	14.0283	0.036		12.7256	0.141	13.093	0.061	12.9676	0.051		14.4064	2.338	13.6798	-0.132	14.4075	-0.154		14.0369	0.203	14.0343	0.029	14.0369	0.234
14.4383	25.426	14.2975	-0.438	14.4746	19.533		14.4397	1.157	14.4397	1.735	14.2975	-0.438		13.7108	0.982	14.4397	1.024	14.0607	0.032		12.755	0.148	13.1233	0.064	12.9975	0.058		14.4397	2.344	13.7114	-0.15	14.4408	-0.151		14.0693	0.217	14.0667	0.031	14.0693	0.237
14.4715	24.029	14.3304	-0.435	14.508	18.038		14.473	1.175	14.473	1.737	14.3304	-0.435		13.7424	1.012	14.473	1.084	14.093	0.035		12.7844	0.148	13.1535	0.067	13.0275	0.059		14.473	2.354	13.743	-0.168	14.4741	-0.149		14.1017	0.243	14.0991	0.03	14.1017	0.242
14.5048	22.589	14.3634	-0.436	14.5413	16.675		14.5062	1.193	14.5062	1.745	14.3634	-0.436		13.774	1.037	14.5062	1.141	14.1255	0.037		12.8138	0.15	13.1837	0.07	13.0574	0.062		14.5062	2.366	13.7746	-0.189	14.5074	-0.138		14.1342	0.295	14.1315	0.029	14.1342	0.244
14.5381	21.263	14.3963	-0.435	14.5747	15.379		14.5395	1.218	14.5395	1.761	14.3963	-0.435		13.8056	1.071	14.5395	1.202	14.1578	0.036		12.8432	0.15	13.214	0.067	13.0874	0.064		14.5395	2.38	13.8062	-0.213	14.5406	-0.124		14.1666	0.397	14.1639	0.03	14.1666	0.247
14.5713	19.954	14.4292	-0.43	14.608	14.158		14.5728	1.249	14.5728	1.788	14.4292	-0.43		13.8372	1.096	14.5728	1.27	14.1902	0.04		12.8726	0.154	13.2442	0.067	13.1173	0.064		14.5728	2.393	13.8378	-0.234	14.5739	-0.107		14.199	0.59	14.1964	0.031	14.199	0.249
14.6046	18.765	14.4622	-0.43	14.6414	13.005		14.606	1.291	14.606	1.817	14.4622	-0.43		13.8688	1.127	14.606	1.343	14.2226	0.041		12.902	0.154	13.2745	0.065	13.1472	0.061		14.606	2.408	13.8694	-0.252	14.6072	-0.092		14.2314	1.037	14.2288	0.032	14.2314	0.249
14.6379	17.603	14.4951	-0.426	14.6747	11.96		14.6393	1.34	14.6393	1.852	14.4951	-0.426		13.9004	1.151	14.6393	1.423	14.255	0.04		12.9314	0.16	13.3047	0.063	13.1772	0.056		14.6393	2.427	13.9009	-0.268	14.6405	-0.078		14.2638	1.922	14.2612	0.032	14.2638	0.25
14.6711	16.526	14.5281	-0.423	14.7081	10.961		14.6726	1.398	14.6726	1.899	14.5281	-0.423		13.932	1.181	14.6726	1.499	14.2874	0.04		12.9608	0.16	13.3349	0.064	13.2072	0.056		14.6726	2.447	13.9325	-0.284	14.6737	-0.069		14.2963	3.444	14.2936	0.032	14.2963	0.254
14.7044	15.553	14.561	-0.418	14.7414	10.069		14.7059	1.472	14.7059	1.962	14.561	-0.418		13.9635	1.205	14.7059	1.577	14.3198	0.039		12.9901	0.155	13.3652	0.06	13.2371	0.056		14.7059	2.466	13.9641	-0.295	14.707	-0.054		14.3287	5.974	14.326	0.032	14.3287	0.256
14.7377	14.64	14.594	-0.413	14.7748	9.213		14.7391	1.567	14.7391	2.046	14.594	-0.413		13.9951	1.234	14.7391	1.662	14.3522	0.041		13.0195	0.155	13.3954	0.061	13.267	0.056		14.7391	2.49	13.9957	-0.303	14.7403	-0.038		14.3611	9.596	14.3584	0.03	14.3611	0.258
14.7709	13.742	14.6269	-0.412	14.8081	8.452		14.7724	1.69	14.7724	2.159	14.6269	-0.412		14.0267	1.262	14.7724	1.751	14.3846	0.041		13.0489	0.157	13.4257	0.062	13.297	0.058		14.7724	2.515	14.0273	-0.309	14.7736	-0.014		14.3935	14.096	14.3908	0.031	14.3935	0.264
14.8042	12.919	14.6599	-0.414	14.8415	7.734		14.8057	1.854	14.8057	2.31	14.6599	-0.414		14.0583	1.29	14.8057	1.856	14.417	0.042		13.0783	0.157	13.4559	0.064	13.3269	0.059		14.8057	2.544	14.0589	-0.316	14.8068	0.006		14.4259	19.909	14.4232	0.032	14.4259	0.268
14.8375	12.132	14.6928	-0.409	14.8748	7.069		14.839	2.069	14.839	2.509	14.6928	-0.409		14.0899	1.322	14.839	1.979	14.4494	0.044		13.1077	0.166	13.4861	0.064	13.3569	0.063		14.839	2.57	14.0905	-0.321	14.8401	0.029		14.4583	26.701	14.4557	0.033	14.4583	0.274
14.8707	11.401	14.7257	-0.402	14.9082	6.459		14.8722	2.35	14.8722	2.774	14.7257	-0.402		14.1215	1.361	14.8722	2.136	14.4818	0.042		13.1371	0.166	13.5164	0.06	13.3868	0.062		14.8722	2.599	14.1221	-0.326	14.8734	0.054		14.4908	33.627	14.4881	0.037	14.4908	0.278
14.904	10.724	14.7587	-0.398	14.9415	5.903		14.9055	2.701	14.9055	3.117	14.7587	-0.398		14.1531	1.416	14.9055	2.352	14.5142	0.042		13.1665	0.171	13.5466	0.059	13.4168	0.061		14.9055	2.626	14.1537	-0.325	14.9067	0.078		14.5232	41.597	14.5205	0.041	14.5232	0.287
14.9373	10.084	14.7916	-0.398	14.9749	5.385		14.9388	3.161	14.9388	3.562	14.7916	-0.398		14.1847	1.481	14.9388	2.642	14.5466	0.041		13.1959	0.171	13.5769	0.054	13.4467	0.061		14.9388	2.667	14.1853	-0.317	14.9399	0.104		14.5556	49.768	14.5529	0.045	14.5556	0.292
14.9705	9.513	14.8246	-0.402	15.0083	4.911		14.972	3.708	14.972	4.132	14.8246	-0.402		14.2163	1.558	14.972	3.007	14.579	0.044		13.2253	0.171	13.6071	0.052	13.4767	0.064		14.972	2.715	14.2169	-0.298	14.9732	0.138		14.588	57.529	14.5853	0.048	14.588	0.301
15.0038	8.954	14.8575	-0.4	15.0416	4.461		15.0053	4.403	15.0053	4.818	14.8575	-0.4		14.2479	1.653	15.0053	3.466	14.6114	0.043		13.2547	0.171	13.6373	0.053	13.5066	0.065		15.0053	2.769	14.2485	-0.271	15.0065	0.172		14.6204	65.465	14.6177	0.052	14.6204	0.307
15.0371	8.449	14.8905	-0.401	15.0749	4.072		15.0386	5.203	15.0386	5.676	14.8905	-0.401		14.2795	1.776	15.0386	3.999	14.6438	0.042		13.2841	0.173	13.6676	0.053	13.5366	0.066		15.0386	2.825	14.2801	-0.234	15.0397	0.214		14.6529	73.06	14.6501	0.057	14.6529	0.317
15.0703	7.99	14.9234	-0.4	15.1083	3.703		15.0718	6.14	15.0718	6.653	14.9234	-0.4		14.311	1.937	15.0718	4.665	14.6762	0.042		13.3134	0.173	13.6978	0.055	13.5665	0.066		15.0718	2.89	14.3117	-0.19	15.073	0.253		14.6853	79.78	14.6825	0.057	14.6853	0.328
15.1036	7.578	14.9564	-0.393	15.1417	3.36		15.1051	7.195	15.1051	7.827	14.9564	-0.393		14.3426	2.158	15.1051	5.421	14.7086	0.039		13.3428	0.176	13.728	0.053	13.5965	0.067		15.1051	2.959	14.3432	-0.14	15.1063	0.305		14.7177	85.871	14.7149	0.066	14.7177	0.342
15.1369	7.2	14.9893	-0.383	15.175	3.053		15.1384	8.322	15.1384	9.086	14.9893	-0.383		14.3742	2.468	15.1384	6.327	14.741	0.042		13.3722	0.176	13.7583	0.052	13.6264	0.069		15.1384	3.035	14.3749	-0.084	15.1396	0.365		14.7501	90.995	14.7474	0.081	14.7501	0.358
15.1702	6.854	15.0222	-0.383	15.2084	2.777		15.1717	9.577	15.1717	10.475	15.0222	-0.383		14.4058	2.93	15.1717	7.377	14.7734	0.041		13.4016	0.169	13.7885	0.048	13.6564	0.07		15.1717	3.12	14.4064	-0.018	15.1728	0.431		14.7825	94.736	14.7798	0.099	14.7825	0.376
15.2034	6.533	15.0552	-0.384	15.2417	2.537		15.2049	10.864	15.2049	11.931	15.0552	-0.384		14.4374	3.591	15.2049	8.598	14.8058	0.044		13.431	0.169	13.8187	0.044	13.6863	0.074		15.2049	3.218	14.438	0.061	15.2061	0.501		14.8149	97.308	14.8122	0.131	14.8149	0.398
15.2367	6.253	15.0881	-0.382	15.2751	2.316		15.2382	12.167	15.2382	13.416	15.0881	-0.382		14.469	4.581	15.2382	9.981	14.8382	0.045		13.4604	0.157	13.849	0.047	13.7163	0.079		15.2382	3.327	14.4696	0.154	15.2394	0.583		14.8474	98.687	14.8446	0.182	14.8474	0.417
15.27	5.979	15.1211	-0.379	15.3084	2.114		15.2715	13.447	15.2715	14.849	15.1211	-0.379		14.5006	5.922	15.2715	11.527	14.8706	0.046		13.4898	0.157	13.8792	0.045	13.7462	0.085		15.2715	3.454	14.5012	0.251	15.2727	0.675		14.8798	98.964	14.877	0.261	14.8798	0.438
15.3032	5.737	15.154	-0.375	15.3418	1.936		15.3048	14.696	15.3048	16.222	15.154	-0.375		14.5322	7.632	15.3048	13.197	14.903	0.045		13.5192	0.156	13.9095	0.046	13.7762	0.086		15.3048	3.596	14.5328	0.359	15.3059	0.78		14.9122	98.109	14.9094	0.369	14.9122	0.462
15.3365	5.51	15.1869	-0.374	15.3751	1.786		15.338	15.866	15.338	17.467	15.1869	-0.374		14.5638	9.839	15.338	15.108	14.9354	0.046		13.5486	0.156	13.9397	0.045	13.8061	0.087		15.338	3.764	14.5644	0.466	15.3392	0.892		14.9446	96.384	14.9418	0.52	14.9446	0.485
15.3698	5.31	15.2199	-0.371	15.4085	1.642		15.3713	16.978	15.3713	18.646	15.2199	-0.371		14.5954	12.384	15.3713	17.085	14.9678	0.05		13.5779	0.151	13.9699	0.038	13.8361	0.091		15.3713	3.941	14.596	0.583	15.3725	1.026		14.977	93.886	14.9742	0.732	14.977	0.511
15.403	5.128	15.2528	-0.364	15.4418	1.523		15.4046	17.938	15.4046	19.64	15.2528	-0.364		14.627	15.429	15.4046	19.27	15.0002	0.053		13.6073	0.151	14.0002	0.039	13.866	0.096		15.4046	4.163	14.6276	0.703	15.4057	1.177		15.0094	90.809	15.0067	1.015	15.0094	0.537
15.4363	4.953	15.2858	-0.356	15.4752	1.411		15.4378	18.842	15.4378	20.51	15.2858	-0.356		14.6586	18.665	15.4378	21.569	15.0326	0.059		13.6367	0.15	14.0304	0.036	13.8959	0.103		15.4378	4.406	14.6592	0.833	15.439	1.352		15.0419	87.19	15.0391	1.4	15.0419	0.561
15.4696	4.801	15.3187	-0.354	15.5085	1.324		15.4711	19.638	15.4711	21.295	15.3187	-0.354		14.6901	22.273	15.4711	23.948	15.065	0.058		13.6661	0.15	14.0607	0.032	13.9259	0.109		15.4711	4.699	14.6908	0.967	15.4723	1.547		15.0743	83.347	15.0715	1.911	15.0743	0.588
15.5028	4.665	15.3517	-0.353	15.5419	1.241		15.5044	20.398	15.5044	21.969	15.3517	-0.353		14.7217	26.032	15.5044	26.356	15.0974	0.056		13.6955	0.145	14.0909	0.035	13.9558	0.114		15.5044	5.042	14.7224	1.099	15.5056	1.783		15.1067	79.29	15.1039	2.573	15.1067	0.611
15.5361	4.543	15.3846	-0.35	15.5752	1.177		15.5376	21.126	15.5376	22.598	15.3846	-0.35		14.7533	29.876	15.5376	28.67	15.1298	0.055		13.7249	0.145	14.1211	0.036	13.9858	0.118		15.5376	5.464	14.754	1.233	15.5389	2.046		15.1391	75.087	15.1363	3.445	15.1391	0.634
15.5694	4.43	15.4176	-0.348	15.6086	1.118		15.5709	21.848	15.5709	23.182	15.4176	-0.348		14.7849	33.676	15.5709	30.881	15.1622	0.055		13.7543	0.145	14.1514	0.037	14.0158	0.123		15.5709	5.983	14.7856	1.366	15.5721	2.375		15.1715	70.73	15.1687	4.527	15.1715	0.653
15.6026	4.332	15.4505	-0.345	15.6419	1.073		15.6042	22.572	15.6042	23.745	15.4505	-0.345		14.8165	37.408	15.6042	32.905	15.1946	0.057		13.7837	0.145	14.1816	0.04	14.0457	0.128		15.6042	6.634	14.8171	1.501	15.6054	2.765		15.204	66.407	15.2011	5.825	15.204	0.671
15.6359	4.243	15.4834	-0.346	15.6753	1.032		15.6375	23.318	15.6375	24.308	15.4834	-0.346		14.8481	40.903	15.6375	34.605	15.227	0.058		13.8131	0.138	14.2118	0.041	14.0756	0.135		15.6375	7.399	14.8487	1.633	15.6387	3.251		15.2364	62.293	15.2335	7.415	15.2364	0.686
15.6692	4.16	15.5164	-0.343	15.7086	1		15.6707	24.027	15.6707	24.836	15.5164	-0.343		14.8797	44.096	15.6707	35.981	15.2594	0.059		13.8424	0.138	14.2421	0.041	14.1056	0.145		15.6707	8.388	14.8803	1.757	15.6719	3.862		15.2688	57.993	15.2659	9.165	15.2688	0.698
15.7024	4.082	15.5493	-0.342	15.742	0.97		15.704	24.733	15.704	25.312	15.5493	-0.342		14.9113	46.796	15.704	36.97	15.2918	0.059		13.8718	0.137	14.2723	0.04	14.1355	0.156		15.704	9.563	14.9119	1.881	15.7052	4.629		15.3012	53.99	15.2984	11.171	15.3012	0.712
15.7357	4.017	15.5823	-0.338	15.7753	0.945		15.7373	25.333	15.7373	25.73	15.5823	-0.338		14.9429	49.154	15.7373	37.522	15.3242	0.058		13.9012	0.137	14.3026	0.041	14.1655	0.168		15.7373	11.055	14.9435	1.996	15.7385	5.556		15.3336	50.035	15.3308	13.398	15.3336	0.722
15.769	3.961	15.6152	-0.332	15.8087	0.922		15.7706	25.827	15.7706	26.032	15.6152	-0.332		14.9745	50.916	15.7706	37.658	15.3566	0.055		13.9306	0.14	14.3328	0.041	14.1954	0.18		15.7706	12.839	14.9751	2.11	15.7718	6.75		15.366	46.32	15.3632	15.509	15.366	0.727
15.8023	3.904	15.6482	-0.325	15.842	0.905		15.8038	26.151	15.8038	26.206	15.6482	-0.325		15.0061	52.234	15.8038	37.382	15.389	0.054		13.96	0.14	14.363	0.041	14.2254	0.19		15.8038	14.973	15.0067	2.214	15.805	8.148		15.3985	42.744	15.3956	17.841	15.3985	0.73
15.8355	3.848	15.6811	-0.32	15.8754	0.884		15.8371	26.281	15.8371	26.209	15.6811	-0.32		15.0377	53.025	15.8371	36.725	15.4214	0.054		13.9894	0.135	14.3933	0.04	14.2553	0.2		15.8371	17.556	15.0383	2.319	15.8383	9.903		15.4309	39.356	15.428	20.3	15.4309	0.73
15.8688	3.794	15.7141	-0.32	15.9087	0.859		15.8704	26.201	15.8704	26.029	15.7141	-0.32		15.0693	53.406	15.8704	35.745	15.4538	0.056		14.0188	0.135	14.4235	0.042	14.2853	0.212		15.8704	20.545	15.0699	2.415	15.8716	11.846		15.4633	36.269	15.4604	22.654	15.4633	0.729
15.902	3.744	15.747	-0.32	15.9421	0.836		15.9036	25.9	15.9036	25.656	15.747	-0.32		15.1008	53.407	15.9036	34.463	15.4862	0.061		14.0482	0.131	14.4537	0.043	14.3152	0.223		15.9036	23.879	15.1015	2.502	15.9049	14.143		15.4957	33.277	15.4928	24.88	15.4957	0.727
15.9353	3.688	15.7799	-0.318	15.9755	0.814		15.9369	25.405	15.9369	25.097	15.7799	-0.318		15.1324	53.081	15.9369	32.97	15.5185	0.064		14.0776	0.131	14.484	0.042	14.3452	0.236		15.9369	27.7	15.1331	2.584	15.9381	16.711		15.5281	30.627	15.5252	27.02	15.5281	0.726
15.9686	3.628	15.8129	-0.32	16.0088	0.795		15.9702	24.686	15.9702	24.366	15.8129	-0.32		15.164	52.503	15.9702	31.329	15.551	0.066		14.1069	0.134	14.5142	0.042	14.3751	0.253		15.9702	31.775	15.1647	2.664	15.9714	19.533		15.5605	28.002	15.5577	28.862	15.5605	0.724
16.0019	3.573	15.8458	-0.319	16.0421	0.771		16.0034	23.826	16.0034	23.479	15.8458	-0.319		15.1956	51.757	16.0034	29.625	15.5833	0.07		14.1363	0.134	14.5445	0.041	14.4051	0.276		16.0034	36.077	15.1963	2.742	16.0047	22.456		15.593	25.611	15.5901	30.455	15.593	0.727
16.0351	3.519	15.8788	-0.316	16.0755	0.745		16.0367	22.794	16.0367	22.494	15.8788	-0.316		15.2272	50.889	16.0367	27.84	15.6158	0.07		14.1657	0.14	14.5747	0.043	14.435	0.298		16.0367	40.285	15.2279	2.815	16.038	25.507		15.6254	23.537	15.6225	31.795	15.6254	0.743
16.0684	3.469	15.9117	-0.313	16.1089	0.714		16.07	21.659	16.07	21.381	15.9117	-0.313		15.2588	49.952	16.07	26.113	15.6481	0.068		14.1951	0.14	14.6049	0.043	14.465	0.319		16.07	44.33	15.2594	2.882	16.0712	28.417		15.6578	21.518	15.6549	32.735	15.6578	0.79
16.1017	3.415	15.9446	-0.306	16.1422	0.689		16.1033	20.425	16.1033	20.244	15.9446	-0.306		15.2904	49.002	16.1033	24.343	15.6805	0.066		14.2245	0.144	14.6352	0.042	14.4949	0.34		16.1033	48.417	15.291	2.947	16.1045	31.335		15.6902	19.684	15.6873	33.413	15.6902	0.909
16.1349	3.358	15.9776	-0.303	16.1756	0.661		16.1365	19.135	16.1365	19.03	15.9776	-0.303		15.322	48.043	16.1365	22.69	15.7129	0.063		14.2539	0.144	14.6654	0.043	14.5249	0.368		16.1365	52.124	15.3226	3.01	16.1378	33.9		15.7226	18.096	15.7197	33.758	15.7226	1.163
16.1682	3.296	16.0105	-0.302	16.2089	0.633		16.1698	17.89	16.1698	17.853	16.0105	-0.302		15.3536	47.18	16.1698	21.071	15.7453	0.063		14.2833	0.147	14.6957	0.04	14.5548	0.394		16.1698	55.468	15.3542	3.072	16.1711	36.248		15.7551	16.699	15.7521	33.788	15.7551	1.658
16.2015	3.246	16.0435	-0.293	16.2423	0.602		16.2031	16.611	16.2031	16.682	16.0435	-0.293		15.3852	46.351	16.2031	19.539	15.7777	0.061		14.3127	0.147	14.7259	0.039	14.5848	0.424		16.2031	58.331	15.3858	3.133	16.2043	38.28		15.7875	15.415	15.7845	33.523	15.7875	2.543
16.2347	3.196	16.0764	-0.282	16.2756	0.573		16.2363	15.39	16.2363	15.546	16.0764	-0.282		15.4168	45.627	16.2363	18.086	15.8101	0.063		14.3421	0.159	14.7561	0.042	14.6147	0.461		16.2363	60.774	15.4174	3.191	16.2376	39.96		15.8199	14.387	15.8169	32.977	15.8199	3.883
16.268	3.151	16.1094	-0.28	16.309	0.551		16.2696	14.236	16.2696	14.432	16.1094	-0.28		15.4483	44.937	16.2696	16.734	15.8425	0.061		14.3715	0.159	14.7864	0.043	14.6447	0.501		16.2696	62.772	15.449	3.251	16.2709	41.208		15.8523	13.447	15.8494	32.225	15.8523	5.856
16.3013	3.102	16.1423	-0.284	16.3423	0.526		16.3029	13.165	16.3029	13.392	16.1423	-0.284		15.4799	44.3	16.3029	15.47	15.8749	0.059		14.4009	0.179	14.8166	0.043	14.6746	0.547		16.3029	64.272	15.4806	3.312	16.3041	42.016		15.8847	12.677	15.8818	31.266	15.8847	8.491
16.3345	3.054	16.1753	-0.283	16.3757	0.498		16.3362	12.162	16.3362	12.384	16.1753	-0.283		15.5115	43.686	16.3362	14.312	15.9073	0.055		14.4302	0.179	14.8468	0.045	14.7045	0.591		16.3362	65.218	15.5122	3.373	16.3374	42.413		15.9171	12.093	15.9142	30.092	15.9171	11.648
16.3678	3.003	16.2082	-0.279	16.409	0.471		16.3694	11.225	16.3694	11.45	16.2082	-0.279		15.5431	43.081	16.3694	13.185	15.9397	0.053		14.4596	0.192	14.8771	0.046	14.7345	0.64		16.3694	65.756	15.5438	3.438	16.3707	42.419		15.9496	11.605	15.9466	28.834	15.9496	15.424
16.4011	2.958	16.2412	-0.272	16.4424	0.442		16.4027	10.305	16.4027	10.526	16.2412	-0.272		15.5747	42.463	16.4027	12.197	15.9721	0.053		14.489	0.192	14.9073	0.044	14.7645	0.697		16.4027	65.88	15.5754	3.513	16.404	42.03		15.982	11.235	15.979	27.44	15.982	19.459
16.4343	2.916	16.2741	-0.266	16.4757	0.42		16.436	9.494	16.436	9.698	16.2741	-0.266		15.6063	41.794	16.436	11.255	16.0045	0.052		14.5184	0.21	14.9375	0.047	14.7944	0.763		16.436	65.63	15.607	3.596	16.4372	41.283		16.0144	11.003	16.0114	25.904	16.0144	23.618
16.4676	2.871	16.307	-0.259	16.5091	0.396		16.4692	8.696	16.4692	8.922	16.307	-0.259		15.6379	41.037	16.4692	10.377	16.0369	0.054		14.5478	0.21	14.9678	0.05	14.8244	0.833		16.4692	65.016	15.6386	3.703	16.4705	40.248		16.0468	10.85	16.0438	24.375	16.0468	27.954
16.5009	2.83	16.34	-0.257	16.5424	0.375		16.5025	7.975	16.5025	8.206	16.34	-0.257		15.6695	40.198	16.5025	9.571	16.0693	0.051		14.5772	0.231	14.998	0.053	14.8543	0.911		16.5025	64.122	15.6702	3.825	16.5038	38.958		16.0792	10.794	16.0762	22.792	16.0792	32.133
16.5341	2.791	16.3729	-0.251	16.5758	0.35		16.5358	7.275	16.5358	7.547	16.3729	-0.251		15.7011	39.197	16.5358	8.823	16.1017	0.048		14.6066	0.231	15.0283	0.058	14.8842	0.991		16.5358	63.009	15.7018	3.961	16.5371	37.439		16.1117	10.826	16.1087	21.137	16.1117	36.095
16.5674	2.753	16.4059	-0.247	16.6091	0.325		16.5691	6.634	16.5691	6.959	16.4059	-0.247		15.7327	38.131	16.5691	8.147	16.1341	0.051		14.636	0.266	15.0585	0.057	14.9142	1.088		16.5691	61.719	15.7333	4.112	16.5703	35.817		16.1441	10.908	16.1411	19.563	16.1441	39.991
16.6007	2.713	16.4388	-0.246	16.6425	0.302		16.6023	6.059	16.6023	6.417	16.4388	-0.246		15.7643	36.882	16.6023	7.513	16.1665	0.049		14.6654	0.266	15.0887	0.058	14.9441	1.189		16.6023	60.276	15.7649	4.289	16.6036	34.008		16.1765	11.03	16.1735	17.992	16.1765	43.542
16.6339	2.675	16.4718	-0.241	16.6758	0.28		16.6356	5.537	16.6356	5.924	16.4718	-0.241		15.7959	35.563	16.6356	6.927	16.1989	0.054		14.6947	0.321	15.119	0.056	14.9741	1.307		16.6356	58.696	15.7965	4.502	16.6369	32.183		16.2089	11.178	16.2059	16.438	16.2089	46.794
16.6672	2.64	16.5047	-0.235	16.7092	0.257		16.6689	5.05	16.6689	5.44	16.5047	-0.235		15.8275	34.125	16.6689	6.397	16.2313	0.053		14.7241	0.321	15.1492	0.056	15.004	1.426		16.6689	57.072	15.8281	4.743	16.6702	30.299		16.2413	11.348	16.2383	14.977	16.2413	49.94
16.7005	2.609	16.5376	-0.234	16.7425	0.232		16.7021	4.623	16.7021	5.029	16.5376	-0.234		15.859	32.619	16.7021	5.915	16.2637	0.054		14.7535	0.411	15.1795	0.058	15.034	1.559		16.7021	55.296	15.8597	5.015	16.7034	28.436		16.2737	11.538	16.2707	13.702	16.2737	52.742
16.7338	2.576	16.5706	-0.236	16.7759	0.206		16.7354	4.213	16.7354	4.639	16.5706	-0.236		15.8906	31.055	16.7354	5.465	16.2961	0.056		14.7829	0.411	15.2097	0.056	15.0639	1.702		16.7354	53.543	15.8913	5.362	16.7367	26.586		16.3062	11.722	16.3031	12.385	16.3062	55.215
16.767	2.538	16.6035	-0.231	16.8092	0.184		16.7687	3.851	16.7687	4.279	16.6035	-0.231		15.9222	29.438	16.7687	5.066	16.3285	0.056		14.8123	0.577	15.2399	0.059	15.0939	1.867		16.7687	51.683	15.9229	5.782	16.77	24.833		16.3386	11.9	16.3355	11.184	16.3386	57.51
16.8003	2.506	16.6365	-0.222	16.8426	0.161		16.802	3.504	16.802	3.944	16.6365	-0.222		15.9538	27.879	16.802	4.688	16.3609	0.057		14.8417	0.577	15.2702	0.059	15.1238	2.044		16.802	49.846	15.9545	6.31	16.8032	23.071		16.371	12.073	16.3679	10.001	16.371	59.407
16.8335	2.476	16.6694	-0.215	16.8759	0.139		16.8352	3.233	16.8352	3.64	16.6694	-0.215		15.9854	26.29	16.8352	4.359	16.3933	0.054		14.8711	0.925	15.3004	0.059	15.1538	2.243		16.8352	47.99	15.9861	6.926	16.8365	21.468		16.4034	12.213	16.4004	8.891	16.4034	60.954
16.8668	2.449	16.7023	-0.209	16.9093	0.119		16.8685	3.072	16.8685	3.371	16.7023	-0.209		16.017	24.776	16.8685	4.052	16.4257	0.053		14.9005	0.925	15.3307	0.057	15.1837	2.458		16.8685	46.102	16.0177	7.691	16.8698	19.865		16.4358	12.329	16.4328	7.871	16.4358	62.186
16.9001	2.417	16.7353	-0.2	16.9426	0.104		16.9018	2.929	16.9018	3.117	16.7353	-0.2		16.0486	23.283	16.9018	3.779	16.4581	0.054		14.9299	1.61	15.3609	0.055	15.2137	2.714		16.9018	44.242	16.0493	8.583	16.9031	18.435		16.4683	12.423	16.4652	6.947	16.4683	63.016
16.9334	2.385	16.7682	-0.195	16.976	0.081		16.935	2.699	16.935	2.889	16.7682	-0.195		16.0802	21.862	16.935	3.526	16.4905	0.057		14.9593	1.61	15.3911	0.054	15.2436	3.004		16.935	42.437	16.0809	9.619	16.9364	17.064		16.5007	12.477	16.4976	6.119	16.5007	63.448
16.9666	2.354	16.8012	-0.191	17.0094	0.06		16.9683	2.403	16.9683	2.685	16.8012	-0.191		16.1118	20.5	16.9683	3.301	16.5229	0.057		14.9886	2.915	15.4214	0.054	15.2736	3.347		16.9683	40.647	16.1125	10.76	16.9696	15.795		16.5331	12.5	16.53	5.419	16.5331	63.503
16.9999	2.324	16.8341	-0.187	17.0427	0.037		17.0016	2.119	17.0016	2.507	16.8341	-0.187		16.1434	19.195	17.0016	3.092	16.5553	0.063		15.018	2.915	15.4516	0.056	15.3035	3.736		17.0016	38.885	16.1441	12.002	17.0029	14.61		16.5655	12.488	16.5624	4.769	16.5655	63.223
17.0332	2.309	16.8671	-0.179	17.076	0.019		17.0348	1.895	17.0348	2.336	16.8671	-0.179		16.175	17.968	17.0348	2.917	16.5877	0.066		15.0474	5.09	15.4818	0.06	15.3335	4.214		17.0348	37.162	16.1757	13.312	17.0362	13.537		16.5979	12.441	16.5948	4.178	16.5979	62.622
17.0664	2.284	16.9	-0.173	17.1094	0.001		17.0681	1.691	17.0681	2.188	16.9	-0.173		16.2066	16.836	17.0681	2.757	16.6201	0.072		15.0768	5.09	15.5121	0.065	15.3634	4.775		17.0681	35.495	16.2072	14.692	17.0694	12.517		16.6303	12.364	16.6272	3.646	16.6303	61.672
17.0997	2.267	16.933	-0.17	17.1427	-0.011		17.1014	1.52	17.1014	2.048	16.933	-0.17		16.2382	15.764	17.1014	2.621	16.6525	0.079		15.1062	8.162	15.5423	0.065	15.3934	5.469		17.1014	33.934	16.2388	15.993	17.1027	11.617		16.6628	12.251	16.6596	3.179	16.6628	60.497
17.133	2.245	16.9659	-0.165	17.1761	-0.027		17.1347	1.374	17.1347	1.932	16.9659	-0.165		16.2697	14.75	17.1347	2.491	16.6849	0.08		15.1356	8.162	15.5725	0.069	15.4233	6.27		17.1347	32.361	16.2704	17.316	17.136	10.75		16.6952	12.113	16.6921	2.762	16.6952	59.158
17.1662	2.231	16.9989	-0.16	17.2095	-0.043		17.1679	1.252	17.1679	1.82	16.9989	-0.16		16.3013	13.78	17.1679	2.379	16.7173	0.086		15.165	12.206	15.6028	0.069	15.4533	7.239		17.1679	30.883	16.302	18.537	17.1693	10		16.7276	11.942	16.7245	2.406	16.7276	57.564
17.1995	2.211	17.0318	-0.147	17.2428	-0.058		17.2012	1.145	17.2012	1.72	17.0318	-0.147		16.3329	12.908	17.2012	2.282	16.7497	0.087		15.1944	12.206	15.633	0.068	15.4832	8.349		17.2012	29.454	16.3336	19.759	17.2025	9.308		16.76	11.748	16.7569	2.082	16.76	55.866
17.2328	2.202	17.0647	-0.137	17.2762	-0.073		17.2345	1.051	17.2345	1.63	17.0647	-0.137		16.3645	12.069	17.2345	2.2	16.7821	0.088		15.2238	17.614	15.6633	0.068	15.5131	9.677		17.2345	28.084	16.3652	20.817	17.2358	8.681		16.7924	11.537	16.7893	1.808	16.7924	54.16
17.266	2.184	17.0977	-0.132	17.3095	-0.085		17.2677	0.96	17.2677	1.551	17.0977	-0.132		16.3961	11.301	17.2677	2.131	16.8145	0.096		15.2531	17.614	15.6935	0.064	15.5431	11.162		17.2677	26.777	16.3968	21.789	17.2691	8.107		16.8249	11.303	16.8217	1.579	16.8249	52.27
17.2993	2.18	17.1306	-0.124	17.3429	-0.101		17.301	0.88	17.301	1.48	17.1306	-0.124		16.4277	10.57	17.301	2.072	16.8469	0.098		15.2825	24.128	15.7237	0.063	15.5731	12.897		17.301	25.525	16.4284	22.667	17.3024	7.599		16.8573	11.048	16.8541	1.38	16.8573	50.326
17.3326	2.172	17.1636	-0.12	17.3762	-0.116		17.3343	0.812	17.3343	1.42	17.1636	-0.12		16.4593	9.895	17.3343	2.021	16.8793	0.102		15.3119	24.128	15.754	0.064	15.603	14.837		17.3343	24.326	16.46	23.471	17.3356	7.139		16.8897	10.782	16.8865	1.216	16.8897	48.467
17.3658	2.166	17.1965	-0.108	17.4096	-0.13		17.3676	0.755	17.3676	1.369	17.1965	-0.108		16.4909	9.263	17.3676	1.978	16.9117	0.108		15.3413	30.82	15.7842	0.062	15.6329	16.991		17.3676	23.218	16.4916	24.132	17.3689	6.737		16.9221	10.497	16.9189	1.079	16.9221	46.445
17.3991	2.16	17.2294	-0.1	17.4429	-0.141		17.4008	0.698	17.4008	1.321	17.2294	-0.1		16.5225	8.667	17.4008	1.933	16.9441	0.112		15.3707	30.82	15.8145	0.063	15.6629	19.346		17.4008	22.115	16.5232	24.674	17.4022	6.351		16.9545	10.201	16.9514	0.959	16.9545	44.402
17.4324	2.155	17.2624	-0.092	17.4763	-0.161		17.4341	0.645	17.4341	1.273	17.2624	-0.092		16.5541	8.116	17.4341	1.893	16.9765	0.121		15.4001	36.927	15.8447	0.06	15.6928	21.892		17.4341	21.12	16.5548	25.161	17.4354	6.019		16.9869	9.904	16.9838	0.861	16.9869	42.515
17.4656	2.157	17.2953	-0.083	17.5096	-0.173		17.4674	0.595	17.4674	1.231	17.2953	-0.083		16.5857	7.609	17.4674	1.853	17.0088	0.129		15.4295	36.927	15.8749	0.059	15.7228	24.531		17.4674	20.15	16.5864	25.629	17.4687	5.704		17.0193	9.581	17.0162	0.78	17.0193	40.496
17.4989	2.152	17.3283	-0.068	17.543	-0.182		17.5007	0.554	17.5007	1.194	17.3283	-0.068		16.6172	7.128	17.5007	1.822	17.0413	0.138		15.4589	41.784	15.9052	0.055	15.7527	27.281		17.5007	19.258	16.618	25.974	17.502	5.422		17.0518	9.263	17.0486	0.708	17.0518	38.503
17.5322	2.147	17.3612	-0.052	17.5763	-0.186		17.5339	0.512	17.5339	1.162	17.3612	-0.052		16.6488	6.692	17.5339	1.788	17.0737	0.143		15.4883	41.784	15.9354	0.053	15.7827	29.974		17.5339	18.405	16.6496	26.202	17.5353	5.166		17.0842	8.943	17.081	0.646	17.0842	36.643
17.5654	2.139	17.3942	-0.036	17.6097	-0.196		17.5672	0.482	17.5672	1.135	17.3942	-0.036		16.6804	6.278	17.5672	1.759	17.106	0.15		15.5176	44.971	15.9656	0.053	15.8126	32.647		17.5672	17.599	16.6811	26.343	17.5685	4.923		17.1166	8.608	17.1134	0.593	17.1166	34.721
17.5987	2.131	17.4271	-0.025	17.643	-0.209		17.6005	0.451	17.6005	1.11	17.4271	-0.025		16.712	5.91	17.6005	1.729	17.1384	0.159		15.547	44.971	15.9959	0.051	15.8426	35.117		17.6005	16.847	16.7127	26.443	17.6018	4.703		17.149	8.281	17.1458	0.546	17.149	32.865
17.632	2.128	17.4601	-0.02	17.6764	-0.223		17.6337	0.425	17.6337	1.083	17.4601	-0.02		16.7436	5.565	17.6337	1.696	17.1708	0.167		15.5764	46.625	16.0261	0.054	15.8725	37.405		17.6337	16.15	16.7443	26.476	17.6351	4.501		17.1814	7.956	17.1782	0.506	17.1814	31.048
17.6653	2.128	17.493	-0.004	17.7097	-0.235		17.667	0.399	17.667	1.062	17.493	-0.004		16.7752	5.252	17.667	1.662	17.2032	0.175		15.6058	46.625	16.0564	0.051	15.9025	39.461		17.667	15.477	16.7759	26.442	17.6684	4.313		17.2139	7.616	17.2107	0.471	17.2139	29.255
17.6985	2.129	17.5259	0.015	17.7431	-0.245		17.7003	0.377	17.7003	1.044	17.5259	0.015		16.8068	4.955	17.7003	1.622	17.2356	0.182		15.6352	47.03	16.0866	0.048	15.9324	41.158		17.7003	14.847	16.8075	26.36	17.7016	4.132		17.2463	7.288	17.2431	0.439	17.2463	27.485
17.7318	2.129	17.5589	0.035	17.7764	-0.251		17.7336	0.353	17.7336	1.027	17.5589	0.035		16.8384	4.688	17.7336	1.585	17.268	0.192		15.6646	47.03	16.1168	0.051	15.9624	42.559		17.7336	14.239	16.8391	26.215	17.7349	3.959		17.2787	6.967	17.2755	0.41	17.2787	25.856
17.765	2.126	17.5918	0.056	17.8098	-0.262		17.7668	0.337	17.7668	1.012	17.5918	0.056		16.87	4.435	17.7668	1.543	17.3004	0.201		15.694	46.532	16.1471	0.048	15.9923	43.536		17.7668	13.686	16.8707	25.985	17.7682	3.798		17.3111	6.635	17.3079	0.388	17.3111	24.237
17.7983	2.122	17.6248	0.075	17.8431	-0.268		17.8001	0.326	17.8001	1.001	17.6248	0.075		16.9016	4.213	17.8001	1.506	17.3328	0.216		15.7234	46.532	16.1773	0.052	16.0223	44.133		17.8001	13.161	16.9023	25.669	17.8015	3.649		17.3435	6.32	17.3403	0.365	17.3435	22.653
17.8316	2.123	17.6577	0.091	17.8765	-0.27		17.8334	0.311	17.8334	0.992	17.6577	0.091		16.9332	4.005	17.8334	1.468	17.3652	0.229		15.7528	45.489	16.2076	0.054	16.0522	44.324		17.8334	12.658	16.9339	25.309	17.8347	3.5		17.3759	6.015	17.3727	0.343	17.3759	21.176
17.8649	2.122	17.6907	0.108	17.9098	-0.276		17.8666	0.298	17.8666	0.986	17.6907	0.108		16.9648	3.824	17.8666	1.433	17.3976	0.24		15.7821	45.489	16.2378	0.051	16.0822	44.135		17.8666	12.187	16.9655	24.888	17.868	3.363		17.4084	5.698	17.4051	0.325	17.4084	19.73
17.8981	2.123	17.7236	0.131	17.9432	-0.286		17.8999	0.287	17.8999	0.976	17.7236	0.131		16.9963	3.652	17.8999	1.397	17.43	0.256		15.8115	44.214	16.268	0.054	16.1121	43.601		17.8999	11.745	16.9971	24.43	17.9013	3.229		17.4408	5.403	17.4375	0.308	17.4408	18.37
17.9314	2.12	17.7566	0.15	17.9765	-0.294		17.9332	0.279	17.9332	0.973	17.7566	0.15		17.0279	3.505	17.9332	1.362	17.4624	0.271		15.8409	44.214	16.2983	0.056	16.1421	42.699		17.9332	11.327	17.0287	23.903	17.9346	3.107		17.4732	5.116	17.4699	0.292	17.4732	17.019
17.9647	2.124	17.7895	0.173	18.0099	-0.3		17.9664	0.27	17.9664	0.968	17.7895	0.173		17.0595	3.364	17.9664	1.333	17.4948	0.29		15.8703	42.954	16.3285	0.056	16.172	41.542		17.9664	10.933	17.0603	23.357	17.9678	2.987		17.5056	4.829	17.5024	0.276	17.5056	15.783
17.9979	2.124	17.8224	0.202	18.0433	-0.307		17.9997	0.261	17.9997	0.97	17.8224	0.202		17.0911	3.248	17.9997	1.309	17.5272	0.305		15.8997	42.954	16.3587	0.057	16.202	40.158		17.9997	10.557	17.0919	22.743	18.0011	2.872		17.538	4.555	17.5348	0.265	17.538	14.662
18.0312	2.126	17.8554	0.228	18.0766	-0.314		18.033	0.257	18.033	0.971	17.8554	0.228		17.1227	3.144	18.033	1.287	17.5596	0.318		15.9291	41.775	16.389	0.054	16.2319	38.646		18.033	10.195	17.1234	22.112	18.0344	2.76		17.5705	4.303	17.5672	0.252	17.5705	13.587
18.0645	2.121	17.8883	0.247	18.11	-0.32		18.0663	0.252	18.0663	0.967	17.8883	0.247		17.1543	3.057	18.0663	1.261	17.592	0.333		15.9585	41.775	16.4192	0.052	16.2619	36.931		18.0663	9.848	17.155	21.455	18.0677	2.655		17.6029	4.045	17.5996	0.242	17.6029	12.557
18.0977	2.114	17.9213	0.27	18.1433	-0.328		18.0995	0.245	18.0995	0.966	17.9213	0.27		17.1859	2.977	18.0995	1.237	17.6244	0.345		15.9879	40.822	16.4494	0.053	16.2918	35.149		18.0995	9.508	17.1866	20.771	18.1009	2.547		17.6353	3.806	17.632	0.234	17.6353	11.576
18.131	2.106	17.9542	0.288	18.1766	-0.335		18.1328	0.241	18.1328	0.963	17.9542	0.288		17.2175	2.905	18.1328	1.214	17.6568	0.362		16.0173	40.822	16.4797	0.055	16.3218	33.272		18.1328	9.189	17.2182	20.064	18.1342	2.447		17.6677	3.585	17.6644	0.226	17.6677	10.683
18.1643	2.093	17.9871	0.311	18.21	-0.336		18.1661	0.236	18.1661	0.963	17.9871	0.311		17.2491	2.847	18.1661	1.193	17.6892	0.377		16.0467	40.032	16.5099	0.055	16.3517	31.423		18.1661	8.878	17.2498	19.32	18.1675	2.344		17.7001	3.368	17.6968	0.22	17.7001	9.851
18.1975	2.071	18.0201	0.332	18.2434	-0.342		18.1993	0.233	18.1993	0.963	18.0201	0.332		17.2807	2.794	18.1993	1.177	17.7216	0.393		16.076	40.032	16.5402	0.059	16.3817	29.501		18.1993	8.592	17.2814	18.621	18.2007	2.251		17.7325	3.164	17.7292	0.213	17.7325	9.058
18.2308	2.049	18.053	0.351	18.2767	-0.344		18.2326	0.227	18.2326	0.961	18.053	0.351		17.3123	2.75	18.2326	1.161	17.754	0.408		16.1054	39.333	16.5704	0.065	16.4116	27.624		18.2326	8.308	17.313	17.898	18.234	2.155		17.765	2.983	17.7616	0.208	17.765	8.358
18.2641	2.028	18.086	0.374	18.3101	-0.352		18.2659	0.225	18.2659	0.957	18.086	0.374		17.3439	2.709	18.2659	1.146	17.7864	0.421		16.1348	39.333	16.6006	0.067	16.4415	25.744		18.2659	8.042	17.3446	17.187	18.2673	2.06		17.7974	2.801	17.7941	0.205	17.7974	7.702
18.2973	2.009	18.1189	0.4	18.3434	-0.356		18.2992	0.22	18.2992	0.951	18.1189	0.4		17.3755	2.676	18.2992	1.123	17.8188	0.442		16.1642	38.647	16.6309	0.075	16.4715	23.958		18.2992	7.783	17.3762	16.471	18.3006	1.968		17.8298	2.628	17.8265	0.206	17.8298	7.113
18.3306	1.983	18.1519	0.422	18.3768	-0.36		18.3324	0.213	18.3324	0.945	18.1519	0.422		17.407	2.648	18.3324	1.107	17.8512	0.456		16.1936	38.647	16.6611	0.08	16.5014	22.19		18.3324	7.534	17.4078	15.789	18.3339	1.875		17.8622	2.478	17.8589	0.204	17.8622	6.554
18.3639	1.961	18.1848	0.436	18.4101	-0.363		18.3657	0.204	18.3657	0.936	18.1848	0.436		17.4386	2.618	18.3657	1.09	17.8836	0.476		16.223	37.828	16.6914	0.08	16.5314	20.541		18.3657	7.294	17.4394	15.139	18.3671	1.788		17.8946	2.327	17.8913	0.2	17.8946	6.058
18.3971	1.942	18.2178	0.45	18.4435	-0.365		18.399	0.192	18.399	0.925	18.2178	0.45		17.4702	2.587	18.399	1.071	17.916	0.496		16.2524	37.828	16.7216	0.086	16.5613	18.953		18.399	7.064	17.471	14.469	18.4004	1.705		17.9271	2.187	17.9237	0.198	17.9271	5.603
18.4304	1.925	18.2507	0.466	18.4768	-0.372		18.4322	0.186	18.4322	0.915	18.2507	0.466		17.5018	2.562	18.4322	1.049	17.9484	0.517		16.2818	36.713	16.7518	0.087	16.5913	17.5		18.4322	6.837	17.5026	13.823	18.4337	1.616		17.9595	2.064	17.9561	0.194	17.9595	5.187
18.4637	1.908	18.2836	0.488	18.5102	-0.378		18.4655	0.178	18.4655	0.908	18.2836	0.488		17.5334	2.536	18.4655	1.029	17.9808	0.537		16.3112	36.713	16.7821	0.088	16.6212	16.115		18.4655	6.627	17.5342	13.206	18.4669	1.528		17.9919	1.942	17.9885	0.191	17.9919	4.807
18.4969	1.892	18.3166	0.51	18.5435	-0.386		18.4988	0.176	18.4988	0.901	18.3166	0.51		17.565	2.508	18.4988	1.007	18.0132	0.556		16.3406	35.205	16.8123	0.095	16.6512	14.836		18.4988	6.425	17.5658	12.629	18.5002	1.446		18.0243	1.827	18.0209	0.187	18.0243	4.467
18.5302	1.875	18.3495	0.524	18.5769	-0.393		18.5321	0.167	18.5321	0.896	18.3495	0.524		17.5966	2.48	18.5321	0.976	18.0456	0.574		16.3699	35.205	16.8425	0.098	16.6811	13.651		18.5321	6.234	17.5973	12.061	18.5335	1.364		18.0567	1.724	18.0534	0.18	18.0567	4.163
18.5635	1.859	18.3825	0.543	18.6102	-0.397		18.5653	0.161	18.5653	0.888	18.3825	0.543		17.6282	2.452	18.5653	0.942	18.078	0.592		16.3993	33.231	16.8728	0.101	16.7111	12.584		18.5653	6.045	17.6289	11.498	18.5668	1.284		18.0891	1.623	18.0858	0.173	18.0891	3.876
18.5968	1.843	18.4154	0.565	18.6436	-0.401		18.5986	0.155	18.5986	0.881	18.4154	0.565		17.6598	2.416	18.5986	0.905	18.1104	0.61		16.4287	33.231	16.903	0.107	16.741	11.609		18.5986	5.87	17.6605	10.992	18.6	1.207		18.1216	1.526	18.1182	0.166	18.1216	3.622
18.63	1.827	18.4484	0.584	18.6769	-0.407		18.6319	0.155	18.6319	0.88	18.4484	0.584		17.6914	2.378	18.6319	0.875	18.1428	0.631		16.4581	30.863	16.9333	0.111	16.771	10.69		18.6319	5.695	17.6921	10.51	18.6333	1.139		18.154	1.441	18.1506	0.158	18.154	3.395
18.6633	1.812	18.4813	0.6	18.7103	-0.408		18.6651	0.16	18.6651	0.882	18.4813	0.6		17.723	2.34	18.6651	0.848	18.1752	0.649		16.4875	30.863	16.9635	0.118	16.8009	9.883		18.6651	5.54	17.7237	10.058	18.6666	1.071		18.1864	1.359	18.183	0.151	18.1864	3.179
18.6965	1.797	18.5143	0.619	18.7436	-0.412		18.6984	0.164	18.6984	0.887	18.5143	0.619		17.7545	2.308	18.6984	0.819	18.2076	0.674		16.5169	28.248	16.9937	0.126	16.8309	9.134		18.6984	5.387	17.7553	9.612	18.6999	1		18.2188	1.281	18.2154	0.146	18.2188	2.995
18.7298	1.785	18.5472	0.634	18.777	-0.415		18.7317	0.176	18.7317	0.893	18.5472	0.634		17.7861	2.274	18.7317	0.782	18.24	0.693		16.5463	28.248	17.024	0.133	16.8608	8.479		18.7317	5.243	17.7869	9.197	18.7331	0.93		18.2512	1.214	18.2478	0.14	18.2512	2.818
18.7631	1.777	18.5801	0.646	18.8103	-0.424		18.7649	0.187	18.7649	0.901	18.5801	0.646		17.8177	2.235	18.7649	0.747	18.2724	0.714		16.5757	25.573	17.0542	0.14	16.8908	7.876		18.7649	5.104	17.8185	8.824	18.7664	0.863		18.2837	1.149	18.2802	0.131	18.2837	2.653
18.7964	1.768	18.6131	0.658	18.8437	-0.43		18.7982	0.205	18.7982	0.913	18.6131	0.658		17.8493	2.201	18.7982	0.71	18.3048	0.735		16.6051	25.573	17.0845	0.145	16.9207	7.35		18.7982	4.979	17.8501	8.466	18.7997	0.805		18.3161	1.083	18.3127	0.127	18.3161	2.51
18.8296	1.761	18.646	0.676	18.877	-0.437		18.8315	0.22	18.8315	0.93	18.646	0.676		17.8809	2.17	18.8315	0.678	18.3372	0.754		16.6345	22.919	17.1147	0.153	16.9507	6.885		18.8315	4.862	17.8817	8.134	18.833	0.754		18.3485	1.026	18.3451	0.119	18.3485	2.377
18.8629	1.754	18.679	0.693	18.9104	-0.446		18.8648	0.244	18.8648	0.947	18.679	0.693		17.9125	2.143	18.8648	0.648	18.3696	0.774		16.6638	22.919	17.1449	0.161	16.9806	6.486		18.8648	4.747	17.9133	7.826	18.8662	0.705		18.3809	0.971	18.3775	0.109	18.3809	2.252
18.8962	1.745	18.7119	0.708	18.9437	-0.456		18.898	0.27	18.898	0.97	18.7119	0.708		17.9441	2.113	18.898	0.616	18.402	0.797		16.6932	20.357	17.1752	0.168	17.0106	6.136		18.898	4.639	17.9449	7.534	18.8995	0.66		18.4133	0.916	18.4099	0.101	18.4133	2.143
18.9294	1.743	18.7448	0.718	18.9771	-0.465		18.9313	0.306	18.9313	1.002	18.7448	0.718		17.9757	2.084	18.9313	0.587	18.4344	0.815		16.7226	20.357	17.2054	0.175	17.0405	5.826		18.9313	4.542	17.9765	7.26	18.9328	0.615		18.4457	0.872	18.4423	0.089	18.4457	2.044
18.9627	1.736	18.7778	0.732	19.0104	-0.472		18.9646	0.346	18.9646	1.045	18.7778	0.732		18.0073	2.057	18.9646	0.555	18.4668	0.833		16.752	18	17.2356	0.182	17.0705	5.559		18.9646	4.449	18.0081	6.982	18.966	0.571		18.4781	0.832	18.4747	0.081	18.4781	1.945
18.996	1.735	18.8107	0.743	19.0438	-0.475		18.9978	0.389	18.9978	1.089	18.8107	0.743		18.0389	2.033	18.9978	0.533	18.4992	0.853		16.7814	18	17.2659	0.191	17.1004	5.333		18.9978	4.367	18.0396	6.733	18.9993	0.529		18.5106	0.79	18.5071	0.075	18.5106	1.859
19.0292	1.733	18.8437	0.755	19.0771	-0.476		19.0311	0.432	19.0311	1.135	18.8437	0.755		18.0705	2.014	19.0311	0.509	18.5315	0.869		16.8108	15.865	17.2961	0.2	17.1304	5.133		19.0311	4.286	18.0712	6.496	19.0326	0.486		18.543	0.753	18.5395	0.071	18.543	1.785
19.0625	1.733	18.8766	0.767	19.1105	-0.482		19.0644	0.476	19.0644	1.178	18.8766	0.767		18.1021	1.997	19.0644	0.49	18.5639	0.887		16.8402	15.865	17.3264	0.214	17.1603	4.964		19.0644	4.215	18.1028	6.283	19.0659	0.452		18.5754	0.719	18.5719	0.067	18.5754	1.708
19.0958	1.731	18.9096	0.777	19.1439	-0.489		19.0977	0.524	19.0977	1.223	18.9096	0.777		18.1336	1.981	19.0977	0.467	18.5964	0.911		16.8696	13.943	17.3566	0.225	17.1902	4.818		19.0977	4.138	18.1344	6.083	19.0991	0.418		18.6078	0.684	18.6044	0.062	18.6078	1.64
19.129	1.728	18.9425	0.789	19.1772	-0.492		19.1309	0.57	19.1309	1.269	18.9425	0.789		18.1652	1.967	19.1309	0.449	18.6288	0.938		16.8989	13.943	17.3868	0.235	17.2202	4.697		19.1309	4.065	18.166	5.896	19.1324	0.387		18.6402	0.651	18.6368	0.058	18.6402	1.58
19.1623	1.724	18.9755	0.8	19.2106	-0.497		19.1642	0.615	19.1642	1.311	18.9755	0.8		18.1968	1.958	19.1642	0.433	18.6611	0.963		16.9283	12.252	17.4171	0.25	17.2502	4.588		19.1642	4.005	18.1976	5.725	19.1657	0.36		18.6727	0.625	18.6692	0.052	18.6727	1.518
19.1956	1.725	19.0084	0.814	19.2439	-0.508		19.1975	0.657	19.1975	1.345	19.0084	0.814		18.2284	1.945	19.1975	0.423	18.6935	0.991		16.9577	12.252	17.4473	0.263	17.2801	4.497		19.1975	3.953	18.2292	5.564	19.199	0.333		18.7051	0.597	18.7016	0.045	18.7051	1.463
19.2288	1.729	19.0413	0.827	19.2773	-0.515		19.2308	0.697	19.2308	1.379	19.0413	0.827		18.26	1.931	19.2308	0.409	18.7259	1.016		16.9871	10.8	17.4775	0.281	17.3101	4.409		19.2308	3.905	18.2608	5.412	19.2322	0.308		18.7375	0.572	18.734	0.041	18.7375	1.412
19.2621	1.735	19.0743	0.84	19.3106	-0.521		19.264	0.733	19.264	1.419	19.0743	0.84		18.2916	1.919	19.264	0.393	18.7583	1.044		17.0165	10.8	17.5078	0.299	17.34	4.334		19.264	3.858	18.2924	5.267	19.2655	0.284		18.7699	0.549	18.7664	0.035	18.7699	1.361
19.2954	1.74	19.1072	0.849	19.344	-0.524		19.2973	0.762	19.2973	1.461	19.1072	0.849		18.3232	1.91	19.2973	0.377	18.7907	1.071		17.0459	9.569	17.538	0.31	17.3699	4.263		19.2973	3.81	18.324	5.126	19.2988	0.273		18.8023	0.526	18.7988	0.029	18.8023	1.313
19.3286	1.742	19.1402	0.864	19.3773	-0.528		19.3306	0.783	19.3306	1.491	19.1402	0.864		18.3548	1.898	19.3306	0.368	18.8231	1.096		17.0753	9.569	17.5683	0.321	17.3999	4.202		19.3306	3.762	18.3556	4.999	19.3321	0.257		18.8347	0.508	18.8312	0.028	18.8347	1.273
19.3619	1.739	19.1731	0.871	19.4107	-0.535		19.3638	0.799	19.3638	1.515	19.1731	0.871		18.3864	1.884	19.3638	0.36	18.8555	1.127		17.1047	8.522	17.5985	0.335	17.4298	4.131		19.3638	3.719	18.3872	4.874	19.3653	0.238		18.8672	0.491	18.8636	0.025	18.8672	1.232
19.3952	1.74	19.2061	0.886	19.444	-0.544		19.3971	0.808	19.3971	1.531	19.2061	0.886		18.418	1.862	19.3971	0.351	18.8879	1.158		17.1341	8.522	17.6287	0.346	17.4598	4.067		19.3971	3.679	18.4188	4.766	19.3986	0.219		18.8996	0.474	18.8961	0.022	18.8996	1.195
19.4285	1.743	19.239	0.901	19.4774	-0.55		19.4304	0.811	19.4304	1.541	19.239	0.901		18.4496	1.842	19.4304	0.341	18.9203	1.194		17.1635	7.651	17.659	0.363	17.4897	4.001		19.4304	3.643	18.4504	4.661	19.4319	0.209		18.932	0.46	18.9285	0.022	18.932	1.159
19.4617	1.747	19.272	0.918	19.5107	-0.554		19.4637	0.812	19.4637	1.546	19.272	0.918		18.4812	1.812	19.4637	0.327	18.9527	1.229		17.1928	7.651	17.6892	0.377	17.5197	3.942		19.4637	3.609	18.4819	4.57	19.4652	0.198		18.9644	0.446	18.9609	0.019	18.9644	1.126
19.495	1.749	19.3049	0.938	19.5441	-0.561		19.4969	0.802	19.4969	1.545	19.3049	0.938		18.5128	1.782	19.4969	0.323	18.9851	1.269		17.2222	6.939	17.7194	0.392	17.5496	3.883		19.4969	3.578	18.5135	4.481	19.4984	0.186		18.9968	0.435	18.9933	0.019	18.9968	1.098
19.5282	1.753	19.3378	0.953	19.5774	-0.567		19.5302	0.789	19.5302	1.542	19.3378	0.953		18.5443	1.748	19.5302	0.315	19.0175	1.31		17.2516	6.939	17.7497	0.407	17.5796	3.825		19.5302	3.545	18.5451	4.398	19.5317	0.174		19.0293	0.425	19.0257	0.02	19.0293	1.068
19.5615	1.757	19.3708	0.964	19.6108	-0.571		19.5635	0.769	19.5635	1.535	19.3708	0.964		18.5759	1.721	19.5635	0.314	19.0499	1.351		17.281	6.36	17.7799	0.417	17.6095	3.761		19.5635	3.511	18.5767	4.325	19.565	0.166		19.0617	0.417	19.0581	0.019	19.0617	1.039
19.5948	1.764	19.4037	0.975	19.6441	-0.575		19.5967	0.754	19.5967	1.528	19.4037	0.975		18.6075	1.689	19.5967	0.31	19.0823	1.393		17.3104	6.36	17.8102	0.435	17.6395	3.696		19.5967	3.484	18.6083	4.257	19.5983	0.158		19.0941	0.41	19.0905	0.021	19.0941	1.011
19.6281	1.769	19.4367	0.987	19.6775	-0.585		19.63	0.73	19.63	1.516	19.4367	0.987		18.6391	1.652	19.63	0.31	19.1147	1.434		17.3398	5.907	17.8404	0.45	17.6694	3.639		19.63	3.458	18.6399	4.19	19.6315	0.146		19.1265	0.403	19.1229	0.024	19.1265	0.982
19.6613	1.774	19.4696	1.003	19.7108	-0.595		19.6633	0.709	19.6633	1.504	19.4696	1.003		18.6707	1.613	19.6633	0.304	19.1471	1.474		17.3692	5.907	17.8706	0.469	17.6994	3.58		19.6633	3.438	18.6715	4.133	19.6648	0.142		19.1589	0.397	19.1554	0.023	19.1589	0.955
19.6946	1.778	19.5025	1.017	19.7442	-0.598		19.6965	0.687	19.6965	1.491	19.5025	1.017		18.7023	1.576	19.6965	0.301	19.1795	1.519		17.3986	5.559	17.9009	0.487	17.7293	3.517		19.6965	3.409	18.7031	4.08	19.6981	0.136		19.1913	0.394	19.1878	0.025	19.1913	0.932
19.7279	1.786	19.5355	1.028	19.7775	-0.6		19.7298	0.666	19.7298	1.475	19.5355	1.028		18.7339	1.539	19.7298	0.303	19.2119	1.557		17.428	5.559	17.9311	0.507	17.7593	3.45		19.7298	3.383	18.7347	4.031	19.7313	0.131		19.2238	0.387	19.2202	0.023	19.2238	0.91
19.7611	1.791	19.5684	1.038	19.8109	-0.607		19.7631	0.638	19.7631	1.459	19.5684	1.038		18.7655	1.504	19.7631	0.297	19.2443	1.594		17.4574	5.272	17.9613	0.524	17.7892	3.391		19.7631	3.358	18.7663	3.982	19.7646	0.122		19.2562	0.38	19.2526	0.022	19.2562	0.89
19.7944	1.792	19.6014	1.055	19.8442	-0.613		19.7964	0.61	19.7964	1.445	19.6014	1.055		18.7971	1.468	19.7964	0.295	19.2767	1.633		17.4867	5.272	17.9916	0.542	17.8192	3.326		19.7964	3.336	18.7979	3.935	19.7979	0.118		19.2886	0.374	19.285	0.024	19.2886	0.87
19.8277	1.797	19.6343	1.075	19.8776	-0.622		19.8296	0.58	19.8296	1.426	19.6343	1.075		18.8287	1.434	19.8296	0.294	19.3091	1.67		17.5161	5.033	18.0218	0.56	17.8491	3.255		19.8296	3.313	18.8295	3.892	19.8312	0.118		19.321	0.365	19.3174	0.025	19.321	0.847
19.8609	1.808	19.6673	1.094	19.9109	-0.631		19.8629	0.553	19.8629	1.407	19.6673	1.094		18.8603	1.397	19.8629	0.294	19.3415	1.7		17.5455	5.033	18.0521	0.577	17.8791	3.185		19.8629	3.29	18.8611	3.858	19.8644	0.114		19.3534	0.356	19.3498	0.021	19.3534	0.828
19.8942	1.81	19.7002	1.107	19.9443	-0.643		19.8962	0.527	19.8962	1.391	19.7002	1.107		18.8919	1.366	19.8962	0.292	19.3739	1.722		17.5749	4.828	18.0823	0.595	17.909	3.116		19.8962	3.27	18.8926	3.823	19.8977	0.114		19.3859	0.35	19.3822	0.017	19.3859	0.81
19.9275	1.806	19.7332	1.124	19.9776	-0.653		19.9294	0.502	19.9294	1.378	19.7332	1.124		18.9234	1.335	19.9294	0.29	19.4063	1.711		17.6043	4.828	18.1125	0.611	17.939	3.045		19.9294	3.251	18.9243	3.793	19.931	0.116		19.4183	0.342	19.4147	0.014	19.4183	0.794
19.9607	1.804	19.7661	1.141	20.011	-0.657		19.9627	0.478	19.9627	1.365	19.7661	1.141		18.955	1.308	19.9627	0.293	19.4387	1.71		17.6337	4.632	18.1428	0.631	17.9689	2.973		19.9627	3.235	18.9558	3.762	19.9643	0.116		19.4507	0.331	19.4471	0.008	19.4507	0.775
19.994	1.81	19.799	1.155	20.0444	-0.66		19.996	0.455	19.996	1.352	19.799	1.155		18.9866	1.285	19.996	0.291	19.4711	1.731		17.6631	4.632	18.173	0.647	17.9989	2.899		19.996	3.216	18.9874	3.736	19.9975	0.117		19.4831	0.32	19.4795	0.003	19.4831	0.76
20.0273	1.817	19.832	1.168	20.0777	-0.663		20.0293	0.434	20.0293	1.339	19.832	1.168		19.0182	1.269	20.0293	0.289	19.5035	1.783		17.6925	4.45	18.2033	0.671	18.0288	2.826		20.0293	3.198	19.019	3.705	20.0308	0.117		19.5155	0.308	19.5119	0	19.5155	0.741
20.0605	1.817	19.8649	1.184	20.111	-0.671		20.0625	0.417	20.0625	1.329	19.8649	1.184		19.0498	1.25	20.0625	0.286	19.5359	1.866		17.7219	4.45	18.2335	0.689	18.0587	2.75		20.0625	3.179	19.0506	3.681	20.0641	0.123		19.5479	0.295	19.5443	-0.006	19.5479	0.724
20.0938	1.819	19.8979	1.205	20.1444	-0.681		20.0958	0.398	20.0958	1.321	19.8979	1.205		19.0814	1.232	20.0958	0.283	19.5683	1.944		17.7512	4.279	18.2637	0.709	18.0887	2.681		20.0958	3.161	19.0822	3.657	20.0974	0.123		19.5804	0.282	19.5767	-0.014	19.5804	0.708
20.1271	1.818	19.9308	1.221	20.1777	-0.686		20.1291	0.379	20.1291	1.309	19.9308	1.221		19.113	1.212	20.1291	0.281	19.6007	2.006		17.7806	4.279	18.294	0.728	18.1186	2.605		20.1291	3.141	19.1138	3.633	20.1306	0.128		19.6128	0.271	19.6091	-0.021	19.6128	0.691
20.1603	1.82	19.9638	1.236	20.2111	-0.694		20.1623	0.362	20.1623	1.3	19.9638	1.236		19.1446	1.198	20.1623	0.279	19.6331	2.071		17.81	4.119	18.3242	0.745	18.1486	2.532		20.1623	3.128	19.1454	3.613	20.1639	0.131		19.6452	0.258	19.6415	-0.029	19.6452	0.675
20.1936	1.821	19.9967	1.254	20.2445	-0.698		20.1956	0.344	20.1956	1.297	19.9967	1.254		19.1762	1.185	20.1956	0.279	19.6655	2.129		17.8394	4.119	18.3544	0.765	18.1785	2.455		20.1956	3.114	19.177	3.593	20.1972	0.14		19.6776	0.243	19.6739	-0.037	19.6776	0.659
20.2269	1.821	20.0297	1.27	20.2778	-0.702		20.2289	0.328	20.2289	1.298	20.0297	1.27		19.2078	1.177	20.2289	0.28	19.6979	2.178		17.8688	3.97	18.3847	0.784	18.2085	2.383		20.2289	3.096	19.2086	3.576	20.2305	0.151		19.71	0.23	19.7064	-0.043	19.71	0.642
20.2601	1.822	20.0626	1.283	20.3112	-0.703		20.2622	0.306	20.2622	1.309	20.0626	1.283		19.2394	1.174	20.2622	0.281	19.7303	2.219		17.8982	3.97	18.4149	0.804	18.2384	2.308		20.2622	3.082	19.2402	3.552	20.2637	0.167		19.7425	0.216	19.7388	-0.048	19.7425	0.625
20.2934	1.823	20.0955	1.293	20.3445	-0.709		20.2954	0.288	20.2954	1.326	20.0955	1.293		19.2709	1.172	20.2954	0.278	19.7627	2.262		17.9276	3.835	18.4452	0.821	18.2684	2.236		20.2954	3.066	19.2718	3.537	20.297	0.181		19.7749	0.204	19.7712	-0.057	19.7749	0.609
20.3267	1.83	20.1285	1.303	20.3779	-0.717		20.3287	0.271	20.3287	1.361	20.1285	1.303		19.3025	1.168	20.3287	0.27	19.7951	2.301		17.957	3.835	18.4754	0.838	18.2983	2.16		20.3287	3.052	19.3034	3.524	20.3303	0.194		19.8073	0.19	19.8036	-0.065	19.8073	0.593
20.36	1.845	20.1614	1.313	20.4112	-0.723		20.362	0.258	20.362	1.411	20.1614	1.313		19.3341	1.162	20.362	0.264	19.8275	2.344		17.9864	3.707	18.5056	0.855	18.3283	2.087		20.362	3.036	19.335	3.51	20.3636	0.204		19.8397	0.178	19.836	-0.071	19.8397	0.578
20.3932	1.873	20.1944	1.329	20.4446	-0.731		20.3952	0.241	20.3952	1.498	20.1944	1.329		19.3657	1.159	20.3952	0.257	19.8599	2.389		18.0158	3.707	18.5359	0.87	18.3582	2.011		20.3952	3.023	19.3666	3.494	20.3968	0.221		19.8721	0.167	19.8684	-0.077	19.8721	0.565
20.4265	1.912	20.2273	1.347	20.4779	-0.736		20.4285	0.222	20.4285	1.624	20.2273	1.347		19.3973	1.158	20.4285	0.25	19.8923	2.436		18.0451	3.581	18.5661	0.888	18.3882	1.942		20.4285	3.009	19.3981	3.48	20.4301	0.242		19.9045	0.155	19.9008	-0.084	19.9045	0.555
20.4597	1.97	20.2602	1.367	20.5113	-0.742		20.4618	0.203	20.4618	1.822	20.2602	1.367		19.4289	1.161	20.4618	0.243	19.9247	2.486		18.0745	3.581	18.5964	0.911	18.4181	1.872		20.4618	2.996	19.4297	3.47	20.4634	0.268		19.937	0.146	19.9332	-0.085	19.937	0.544
20.493	2.06	20.2932	1.386	20.5446	-0.745		20.495	0.187	20.495	2.083	20.2932	1.386		19.4605	1.163	20.495	0.242	19.9571	2.532		18.1039	3.458	18.6266	0.936	18.4481	1.806		20.495	2.979	19.4613	3.463	20.4966	0.296		19.9694	0.14	19.9657	-0.089	19.9694	0.534
20.5263	2.197	20.3261	1.409	20.578	-0.755		20.5283	0.167	20.5283	2.449	20.3261	1.409		19.4921	1.173	20.5283	0.239	19.9895	2.575		18.1333	3.458	18.6568	0.959	18.478	1.739		20.5283	2.966	19.4929	3.45	20.5299	0.327		20.0018	0.136	19.9981	-0.092	20.0018	0.523
20.5596	2.36	20.3591	1.442	20.6113	-0.759		20.5616	0.152	20.5616	2.931	20.3591	1.442		19.5237	1.181	20.5616	0.235	20.0219	2.616		18.1627	3.34	18.6871	0.985	18.508	1.674		20.5616	2.953	19.5245	3.438	20.5632	0.357		20.0342	0.13	20.0305	-0.089	20.0342	0.513
20.5928	2.589	20.392	1.476	20.6447	-0.769		20.5949	0.135	20.5949	3.536	20.392	1.476		19.5553	1.191	20.5949	0.225	20.0542	2.661		18.1921	3.34	18.7173	1.008	18.5379	1.614		20.5949	2.947	19.5561	3.423	20.5965	0.395		20.0666	0.126	20.0629	-0.088	20.0666	0.502
20.6261	2.874	20.425	1.52	20.678	-0.782		20.6281	0.12	20.6281	4.244	20.425	1.52		19.5869	1.194	20.6281	0.224	20.0866	2.704		18.2215	3.215	18.7475	1.033	18.5679	1.559		20.6281	2.938	19.5877	3.412	20.6297	0.436		20.099	0.12	20.0953	-0.086	20.099	0.492
20.6594	3.233	20.4579	1.589	20.7114	-0.788		20.6614	0.1	20.6614	5.012	20.4579	1.589		19.6185	1.2	20.6614	0.22	20.119	2.745		18.2509	3.215	18.7778	1.061	18.5978	1.501		20.6614	2.93	19.6193	3.395	20.663	0.485		20.1315	0.116	20.1277	-0.088	20.1315	0.481
20.6926	3.659	20.4909	1.685	20.7447	-0.798		20.6947	0.085	20.6947	5.781	20.4909	1.685		19.6501	1.207	20.6947	0.22	20.1514	2.778		18.2803	3.084	18.808	1.083	18.6278	1.445		20.6947	2.918	19.6509	3.383	20.6963	0.523		20.1639	0.11	20.1601	-0.088	20.1639	0.47
20.7259	4.143	20.5238	1.819	20.7781	-0.801		20.7279	0.067	20.7279	6.524	20.5238	1.819		19.6816	1.215	20.7279	0.219	20.1838	2.809		18.3097	3.084	18.8382	1.111	18.6577	1.395		20.7279	2.906	19.6825	3.37	20.7296	0.566		20.1963	0.106	20.1925	-0.089	20.1963	0.462
20.7592	4.683	20.5567	2.002	20.8114	-0.81		20.7612	0.048	20.7612	7.171	20.5567	2.002		19.7132	1.227	20.7612	0.22	20.2162	2.839		18.339	2.96	18.8685	1.137	18.6877	1.341		20.7612	2.9	19.7141	3.358	20.7628	0.608		20.2287	0.099	20.2249	-0.09	20.2287	0.452
20.7924	5.213	20.5897	2.254	20.8448	-0.814		20.7945	0.034	20.7945	7.746	20.5897	2.254		19.7448	1.237	20.7945	0.224	20.2486	2.865		18.3684	2.96	18.8987	1.168	18.7176	1.289		20.7945	2.897	19.7457	3.347	20.7961	0.651		20.2611	0.098	20.2574	-0.09	20.2611	0.444
20.8257	5.714	20.6226	2.579	20.8781	-0.824		20.8278	0.018	20.8278	8.202	20.6226	2.579		19.7764	1.251	20.8278	0.226	20.281	2.899		18.3978	2.837	18.929	1.201	18.7476	1.241		20.8278	2.891	19.7773	3.336	20.8294	0.689		20.2935	0.093	20.2898	-0.089	20.2935	0.439
20.859	6.154	20.6556	2.983	20.9115	-0.836		20.861	0.008	20.861	8.541	20.6556	2.983		19.808	1.265	20.861	0.23	20.3134	2.938		18.4272	2.837	18.9592	1.237	18.7775	1.202		20.861	2.887	19.8088	3.328	20.8626	0.727		20.326	0.089	20.3222	-0.089	20.326	0.432
20.8922	6.512	20.6885	3.447	20.9448	-0.848		20.8943	-0.007	20.8943	8.764	20.6885	3.447		19.8396	1.28	20.8943	0.233	20.3458	2.98		18.4566	2.708	18.9894	1.275	18.8074	1.166		20.8943	2.887	19.8405	3.314	20.8959	0.757		20.3584	0.087	20.3546	-0.093	20.3584	0.425
20.9255	6.765	20.7215	3.957	20.9782	-0.856		20.9276	-0.015	20.9276	8.853	20.7215	3.957		19.8712	1.291	20.9276	0.242	20.3782	3.02		18.486	2.708	19.0197	1.312	18.8374	1.122		20.9276	2.886	19.872	3.303	20.9292	0.782		20.3908	0.08	20.387	-0.099	20.3908	0.418
20.9588	6.923	20.7544	4.508	21.0115	-0.865		20.9609	-0.025	20.9609	8.831	20.7544	4.508		19.9028	1.301	20.9609	0.257	20.4106	3.064		18.5154	2.586	19.0499	1.351	18.8673	1.078		20.9609	2.885	19.9036	3.292	20.9625	0.802		20.4232	0.073	20.4194	-0.105	20.4232	0.413
20.992	6.979	20.7873	5.024	21.0449	-0.868		20.9941	-0.031	20.9941	8.707	20.7873	5.024		19.9344	1.309	20.9941	0.272	20.443	3.112		18.5448	2.586	19.0801	1.389	18.8973	1.04		20.9941	2.882	19.9352	3.279	20.9958	0.818		20.4556	0.064	20.4518	-0.111	20.4556	0.406
21.0253	6.942	20.8203	5.502	21.0783	-0.874		21.0274	-0.036	21.0274	8.49	20.8203	5.502		19.966	1.321	21.0274	0.288	20.4754	3.159		18.5741	2.469	19.1104	1.429	18.9273	1.005		21.0274	2.883	19.9668	3.265	21.029	0.825		20.4881	0.057	20.4842	-0.114	20.4881	0.402
21.0586	6.819	20.8532	5.872	21.1116	-0.879		21.0607	-0.038	21.0607	8.188	20.8532	5.872		19.9976	1.333	21.0607	0.301	20.5078	3.216		18.6035	2.469	19.1406	1.466	18.9572	0.973		21.0607	2.888	19.9984	3.253	21.0623	0.825		20.5205	0.047	20.5166	-0.118	20.5205	0.399
21.0918	6.618	20.8862	6.155	21.145	-0.884		21.0939	-0.042	21.0939	7.817	20.8862	6.155		20.0292	1.348	21.0939	0.318	20.5402	3.278		18.6329	2.364	19.1709	1.507	18.9871	0.939		21.0939	2.889	20.03	3.247	21.0956	0.815		20.5529	0.038	20.5491	-0.12	20.5529	0.393
21.1251	6.354	20.9191	6.339	21.1783	-0.884		21.1272	-0.046	21.1272	7.405	20.9191	6.339		20.0607	1.358	21.1272	0.331	20.5726	3.354		18.6623	2.364	19.2011	1.544	19.0171	0.914		21.1272	2.891	20.0616	3.237	21.1288	0.806		20.5853	0.028	20.5815	-0.127	20.5853	0.387
21.1584	6.037	20.9521	6.426	21.2117	-0.883		21.1605	-0.052	21.1605	6.952	20.9521	6.426		20.0923	1.368	21.1605	0.345	20.605	3.44		18.6917	2.265	19.2313	1.579	19.047	0.883		21.1605	2.897	20.0932	3.224	21.1621	0.795		20.6177	0.017	20.6139	-0.136	20.6177	0.381
21.1916	5.674	20.985	6.422	21.245	-0.876		21.1938	-0.052	21.1938	6.502	20.985	6.422		20.1239	1.378	21.1938	0.357	20.6374	3.529		18.7211	2.265	19.2616	1.612	19.077	0.855		21.1938	2.901	20.1248	3.207	21.1954	0.783		20.6502	0.001	20.6463	-0.143	20.6502	0.376
21.2249	5.279	21.0179	6.341	21.2784	-0.873		21.227	-0.049	21.227	6.026	21.0179	6.341		20.1555	1.39	21.227	0.371	20.6698	3.635		18.7505	2.169	19.2918	1.649	19.1069	0.83		21.227	2.905	20.1564	3.19	21.2287	0.764		20.6826	-0.007	20.6787	-0.156	20.6826	0.372
21.2582	4.899	21.0509	6.182	21.3117	-0.869		21.2603	-0.044	21.2603	5.574	21.0509	6.182		20.1871	1.401	21.2603	0.381	20.7022	3.755		18.7799	2.169	19.3221	1.684	19.1369	0.812		21.2603	2.91	20.188	3.178	21.2619	0.743		20.715	-0.019	20.7111	-0.164	20.715	0.371
21.2915	4.525	21.0838	5.973	21.3451	-0.865		21.2936	-0.044	21.2936	5.125	21.0838	5.973		20.2187	1.416	21.2936	0.385	20.7346	3.884		18.8093	2.083	19.3523	1.711	19.1668	0.792		21.2936	2.917	20.2196	3.167	21.2952	0.719		20.7474	-0.031	20.7435	-0.172	20.7474	0.367
21.3247	4.163	21.1168	5.712	21.3784	-0.857		21.3268	-0.041	21.3268	4.694	21.1168	5.712		20.2503	1.426	21.3268	0.389	20.767	4.014		18.8387	2.083	19.3825	1.721	19.1968	0.772		21.3268	2.913	20.2512	3.158	21.3285	0.694		20.7798	-0.04	20.7759	-0.18	20.7798	0.361
21.358	3.822	21.1497	5.421	21.4118	-0.846		21.3601	-0.039	21.3601	4.276	21.1497	5.421		20.2819	1.441	21.3601	0.394	20.7994	4.134		18.8681	2.007	19.4128	1.709	19.2267	0.752		21.3601	2.91	20.2828	3.143	21.3618	0.668		20.8122	-0.049	20.8084	-0.189	20.8122	0.355
21.3912	3.485	21.1827	5.117	21.4451	-0.837		21.3934	-0.038	21.3934	3.885	21.1827	5.117		20.3135	1.452	21.3934	0.396	20.8318	4.242		18.8974	2.007	19.443	1.711	19.2567	0.735		21.3934	2.908	20.3143	3.132	21.395	0.641		20.8447	-0.059	20.8408	-0.196	20.8447	0.348
21.4245	3.183	21.2156	4.802	21.4785	-0.83		21.4266	-0.036	21.4266	3.509	21.2156	4.802		20.3451	1.469	21.4266	0.395	20.8642	4.327		18.9268	1.939	19.4733	1.733	19.2866	0.714		21.4266	2.915	20.3459	3.116	21.4283	0.614		20.8771	-0.068	20.8732	-0.203	20.8771	0.344
21.4578	2.892	21.2486	4.49	21.5118	-0.813		21.4599	-0.032	21.4599	3.175	21.2486	4.49		20.3767	1.484	21.4599	0.393	20.8966	4.373		18.9562	1.939	19.5035	1.783	19.3166	0.7		21.4599	2.911	20.3775	3.106	21.4616	0.588		20.9095	-0.076	20.9056	-0.212	20.9095	0.339
21.4911	2.63	21.2815	4.178	21.5452	-0.796		21.4932	-0.031	21.4932	2.845	21.2815	4.178		20.4082	1.503	21.4932	0.39	20.929	4.387		18.9856	1.883	19.5337	1.86	19.3465	0.685		21.4932	2.908	20.4091	3.095	21.4948	0.56		20.9419	-0.079	20.938	-0.219	20.9419	0.337
21.5243	2.387	21.3144	3.873	21.5785	-0.783		21.5265	-0.026	21.5265	2.564	21.3144	3.873		20.4398	1.523	21.5265	0.381	20.9614	4.348		19.015	1.883	19.564	1.933	19.3765	0.671		21.5265	2.9	20.4407	3.085	21.5281	0.531		20.9743	-0.083	20.9704	-0.222	20.9743	0.336
21.5576	2.176	21.3474	3.581	21.6119	-0.77		21.5597	-0.019	21.5597	2.309	21.3474	3.581		20.4714	1.552	21.5597	0.368	20.9938	4.262		19.0444	1.834	19.5942	1.993	19.4064	0.656		21.5597	2.899	20.4723	3.075	21.5614	0.504		21.0067	-0.088	21.0028	-0.225	21.0067	0.332
21.5909	1.986	21.3803	3.299	21.6452	-0.757		21.593	-0.013	21.593	2.089	21.3803	3.299		20.503	1.583	21.593	0.349	21.0262	4.13		19.0738	1.834	19.6244	2.055	19.4364	0.642		21.593	2.894	20.5039	3.062	21.5947	0.481		21.0392	-0.088	21.0352	-0.227	21.0392	0.331
21.6241	1.828	21.4133	3.033	21.6786	-0.742		21.6263	-0.005	21.6263	1.888	21.4133	3.033		20.5346	1.622	21.6263	0.337	21.0586	3.962		19.1032	1.791	19.6547	2.109	19.4663	0.632		21.6263	2.894	20.5355	3.05	21.6279	0.463		21.0716	-0.087	21.0677	-0.226	21.0716	0.325
21.6574	1.686	21.4462	2.785	21.7119	-0.733		21.6595	0	21.6595	1.713	21.4462	2.785		20.5662	1.656	21.6595	0.322	21.091	3.739		19.1325	1.791	19.6849	2.159	19.4963	0.62		21.6595	2.893	20.5671	3.039	21.6612	0.445		21.104	-0.085	21.1001	-0.222	21.104	0.326
21.6907	1.577	21.4792	2.567	21.7453	-0.721		21.6928	0.009	21.6928	1.566	21.4792	2.567		20.5978	1.697	21.6928	0.31	21.1234	3.492		19.1619	1.754	19.7152	2.2	19.5262	0.612		21.6928	2.897	20.5987	3.03	21.6945	0.43		21.1364	-0.076	21.1325	-0.215	21.1364	0.324
21.7239	1.487	21.5121	2.373	21.7786	-0.714		21.7261	0.016	21.7261	1.442	21.5121	2.373		20.6294	1.732	21.7261	0.293	21.1558	3.243		19.1913	1.754	19.7454	2.241	19.5562	0.603		21.7261	2.894	20.6303	3.012	21.7278	0.413		21.1688	-0.069	21.1649	-0.208	21.1688	0.324
21.7572	1.412	21.545	2.209	21.812	-0.701		21.7594	0.025	21.7594	1.345	21.545	2.209		20.661	1.776	21.7594	0.28	21.1882	2.956		19.2207	1.738	19.7756	2.279	19.5861	0.597		21.7594	2.893	20.6619	2.995	21.761	0.396		21.2013	-0.061	21.1973	-0.2	21.2013	0.323
21.7905	1.359	21.578	2.067	21.8453	-0.686		21.7926	0.036	21.7926	1.27	21.578	2.067		20.6926	1.817	21.7926	0.265	21.2206	2.676		19.2501	1.738	19.8059	2.313	19.6161	0.586		21.7926	2.893	20.6935	2.981	21.7943	0.383		21.2337	-0.053	21.2297	-0.192	21.2337	0.322
21.8237	1.321	21.6109	1.951	21.8787	-0.676		21.8259	0.038	21.8259	1.211	21.6109	1.951		20.7242	1.855	21.8259	0.251	21.253	2.39		19.2795	1.707	19.8361	2.357	19.646	0.577		21.8259	2.896	20.725	2.976	21.8276	0.374		21.2661	-0.045	21.2621	-0.185	21.2661	0.323
21.857	1.301	21.6439	1.85	21.912	-0.661		21.8592	0.043	21.8592	1.167	21.6439	1.85		20.7558	1.886	21.8592	0.234	21.2854	2.12		19.3089	1.707	19.8663	2.398	19.676	0.569		21.8592	2.895	20.7567	2.971	21.8609	0.368		21.2985	-0.04	21.2945	-0.175	21.2985	0.32
21.8903	1.291	21.6768	1.762	21.9454	-0.65		21.8924	0.047	21.8924	1.133	21.6768	1.762		20.7873	1.908	21.8924	0.223	21.3178	1.851		19.3383	1.684	19.8966	2.442	19.7059	0.563		21.8924	2.891	20.7882	2.964	21.8941	0.362		21.3309	-0.032	21.3269	-0.16	21.3309	0.317
21.9235	1.296	21.7098	1.691	21.9787	-0.634		21.9257	0.055	21.9257	1.112	21.7098	1.691		20.819	1.924	21.9257	0.218	21.3502	1.593		19.3677	1.684	19.9268	2.489	19.7358	0.556		21.9257	2.884	20.8198	2.959	21.9274	0.355		21.3633	-0.026	21.3594	-0.15	21.3633	0.315
21.9568	1.309	21.7427	1.639	22.0121	-0.619		21.959	0.065	21.959	1.102	21.7427	1.639		20.8505	1.925	21.959	0.217	21.3826	1.354		19.3971	1.666	19.9571	2.532	19.7658	0.549		21.959	2.881	20.8514	2.948	21.9607	0.349		21.3958	-0.02	21.3918	-0.14	21.3958	0.309
21.9901	1.332	21.7756	1.599	22.0454	-0.6		21.9923	0.075	21.9923	1.106	21.7756	1.599		20.8821	1.915	21.9923	0.214	21.415	1.135		19.4264	1.666	19.9873	2.573	19.7957	0.545		21.9923	2.881	20.883	2.939	21.994	0.345		21.4282	-0.012	21.4242	-0.131	21.4282	0.309
22.0233	1.366	21.8086	1.572	22.0788	-0.588		22.0255	0.085	22.0255	1.113	21.8086	1.572		20.9137	1.895	22.0255	0.207	21.4474	0.932		19.4558	1.657	20.0175	2.611	19.8257	0.54		22.0255	2.881	20.9146	2.93	22.0272	0.341		21.4606	-0.006	21.4566	-0.125	21.4606	0.308
22.0566	1.411	21.8415	1.556	22.1121	-0.575		22.0588	0.098	22.0588	1.129	21.8415	1.556		20.9453	1.865	22.0588	0.205	21.4797	0.757		19.4852	1.657	20.0478	2.652	19.8556	0.535		22.0588	2.876	20.9462	2.92	22.0605	0.337		21.493	0	21.489	-0.121	21.493	0.308
22.0899	1.46	21.8745	1.552	22.1455	-0.567		22.0921	0.102	22.0921	1.149	21.8745	1.552		20.9769	1.819	22.0921	0.197	21.5121	0.597		19.5146	1.647	20.078	2.693	19.8856	0.528		22.0921	2.87	20.9778	2.907	22.0938	0.331		21.5254	0.005	21.5214	-0.113	21.5254	0.307
22.1231	1.513	21.9074	1.552	22.1789	-0.55		22.1253	0.109	22.1253	1.174	21.9074	1.552		21.0085	1.761	22.1253	0.196	21.5446	0.462		19.544	1.647	20.1083	2.73	19.9155	0.52		22.1253	2.863	21.0094	2.892	22.1271	0.321		21.5578	0.008	21.5538	-0.107	21.5578	0.305
22.1564	1.573	21.9404	1.563	22.2122	-0.537		22.1586	0.115	22.1586	1.196	21.9404	1.563		21.0401	1.701	22.1586	0.193	21.577	0.354		19.5734	1.653	20.1385	2.767	19.9455	0.512		22.1586	2.862	21.041	2.88	22.1603	0.312		21.5903	0.009	21.5862	-0.103	21.5903	0.304
22.1897	1.635	21.9733	1.58	22.2456	-0.525		22.1919	0.124	22.1919	1.221	21.9733	1.58		21.0717	1.633	22.1919	0.191	21.6093	0.263		19.6028	1.653	20.1687	2.797	19.9754	0.507		22.1919	2.853	21.0726	2.869	22.1936	0.304		21.6227	0.011	21.6186	-0.1	21.6227	0.303
22.223	1.696	22.0063	1.609	22.2789	-0.514		22.2252	0.134	22.2252	1.243	22.0063	1.609		21.1033	1.568	22.2252	0.187	21.6417	0.192		19.6322	1.652	20.199	2.82	20.0054	0.506		22.2252	2.846	21.1042	2.857	22.2269	0.3		21.6551	0.015	21.6511	-0.096	21.6551	0.302
22.2562	1.755	22.0392	1.644	22.3123	-0.501		22.2584	0.142	22.2584	1.269	22.0392	1.644		21.1349	1.498	22.2584	0.178	21.6741	0.141		19.6616	1.652	20.2292	2.85	20.0353	0.507		22.2584	2.836	21.1358	2.846	22.2601	0.294		21.6875	0.015	21.6835	-0.095	21.6875	0.3
22.2895	1.815	22.0722	1.684	22.3456	-0.489		22.2917	0.149	22.2917	1.293	22.0722	1.684		21.1665	1.429	22.2917	0.174	21.7065	0.098		19.691	1.653	20.2594	2.875	20.0653	0.503		22.2917	2.83	21.1674	2.834	22.2934	0.288		21.7199	0.018	21.7159	-0.094	21.7199	0.298
22.3227	1.865	22.1051	1.719	22.379	-0.476		22.325	0.153	22.325	1.32	22.1051	1.719		21.198	1.362	22.325	0.17	21.7389	0.077		19.7203	1.653	20.2897	2.908	20.0952	0.498		22.325	2.824	21.1989	2.821	22.3267	0.282		21.7523	0.018	21.7483	-0.092	21.7523	0.293
22.356	1.909	22.138	1.749	22.4123	-0.468		22.3582	0.156	22.3582	1.336	22.138	1.749		21.2296	1.302	22.3582	0.167	21.7713	0.065		19.7497	1.662	20.3199	2.947	20.1252	0.492		22.3582	2.817	21.2305	2.805	22.36	0.274		21.7848	0.015	21.7807	-0.089	21.7848	0.289
22.3893	1.952	22.171	1.784	22.4457	-0.453		22.3915	0.161	22.3915	1.351	22.171	1.784		21.2612	1.25	22.3915	0.164	21.8037	0.071		19.7791	1.662	20.3501	2.986	20.1551	0.49		22.3915	2.81	21.2621	2.783	22.3932	0.268		21.8172	0.013	21.8131	-0.09	21.8172	0.286
22.4226	1.991	22.2039	1.823	22.479	-0.445		22.4248	0.17	22.4248	1.369	22.2039	1.823		21.2928	1.203	22.4248	0.162	21.8361	0.094		19.8085	1.679	20.3804	3.023	20.1851	0.484		22.4248	2.801	21.2937	2.764	22.4265	0.264		21.8496	0.01	21.8455	-0.087	21.8496	0.284
22.4558	2.027	22.2369	1.862	22.5124	-0.435		22.4581	0.177	22.4581	1.384	22.2369	1.862		21.3244	1.163	22.4581	0.16	21.8685	0.129		19.8379	1.679	20.4106	3.064	20.215	0.478		22.4581	2.793	21.3253	2.746	22.4598	0.263		21.882	0.009	21.8779	-0.086	21.882	0.284
22.4891	2.053	22.2698	1.888	22.5457	-0.423		22.4913	0.181	22.4913	1.399	22.2698	1.888		21.356	1.131	22.4913	0.162	21.9009	0.178		19.8673	1.696	20.4409	3.108	20.245	0.474		22.4913	2.786	21.3569	2.726	22.4931	0.254		21.9144	0.011	21.9104	-0.085	21.9144	0.284
22.5224	2.081	22.3027	1.913	22.5791	-0.408		22.5246	0.186	22.5246	1.407	22.3027	1.913		21.3876	1.102	22.5246	0.16	21.9333	0.244		19.8967	1.696	20.4711	3.151	20.2749	0.472		22.5246	2.777	21.3885	2.705	22.5263	0.248		21.9469	0.014	21.9428	-0.083	21.9469	0.283
22.5556	2.103	22.3357	1.934	22.6124	-0.398		22.5579	0.191	22.5579	1.416	22.3357	1.934		21.4192	1.075	22.5579	0.157	21.9657	0.326		19.9261	1.714	20.5013	3.203	20.3049	0.468		22.5579	2.768	21.4201	2.683	22.5596	0.242		21.9793	0.02	21.9752	-0.079	21.9793	0.281
22.5889	2.121	22.3686	1.951	22.6458	-0.396		22.5911	0.198	22.5911	1.421	22.3686	1.951		21.4508	1.049	22.5911	0.158	21.9981	0.418		19.9555	1.714	20.5316	3.265	20.3348	0.462		22.5911	2.755	21.4517	2.66	22.5929	0.243		22.0117	0.021	22.0076	-0.077	22.0117	0.28
22.6222	2.137	22.4016	1.962	22.6791	-0.393		22.6244	0.204	22.6244	1.429	22.4016	1.962		21.4824	1.028	22.6244	0.161	22.0305	0.517		19.9849	1.733	20.5618	3.325	20.3648	0.457		22.6244	2.751	21.4833	2.64	22.6262	0.247		22.0441	0.022	22.04	-0.076	22.0441	0.278
22.6554	2.149	22.4345	1.971	22.7125	-0.387		22.6577	0.212	22.6577	1.441	22.4345	1.971		21.514	1.015	22.6577	0.166	22.0629	0.603		20.0142	1.733	20.5921	3.402	20.3947	0.455		22.6577	2.741	21.5149	2.617	22.6594	0.248		22.0765	0.023	22.0724	-0.074	22.0765	0.279
22.6887	2.17	22.4675	1.978	22.7458	-0.375		22.691	0.221	22.691	1.453	22.4675	1.978		21.5456	0.998	22.691	0.168	22.0953	0.678		20.0436	1.748	20.6223	3.486	20.4247	0.453		22.691	2.73	21.5465	2.592	22.6927	0.242		22.109	0.023	22.1048	-0.073	22.109	0.279
22.722	2.184	22.5004	1.986	22.7792	-0.368		22.7242	0.231	22.7242	1.467	22.5004	1.986		21.5771	0.982	22.7242	0.171	22.1277	0.733		20.073	1.748	20.6525	3.581	20.4546	0.44		22.7242	2.719	21.5781	2.566	22.726	0.24		22.1414	0.024	22.1372	-0.071	22.1414	0.278
22.7552	2.202	22.5333	1.995	22.8125	-0.368		22.7575	0.245	22.7575	1.478	22.5333	1.995		21.6087	0.966	22.7575	0.17	22.1601	0.766		20.1024	1.774	20.6828	3.681	20.4845	0.438		22.7575	2.711	21.6097	2.542	22.7593	0.241		22.1738	0.027	22.1697	-0.065	22.1738	0.277
22.7885	2.217	22.5663	1.999	22.8459	-0.371		22.7908	0.255	22.7908	1.487	22.5663	1.999		21.6403	0.954	22.7908	0.168	22.1925	0.784		20.1318	1.774	20.713	3.795	20.5145	0.434		22.7908	2.705	21.6412	2.518	22.7925	0.245		22.2062	0.029	22.2021	-0.061	22.2062	0.277
22.8218	2.232	22.5992	2.004	22.8792	-0.37		22.824	0.265	22.824	1.5	22.5992	2.004		21.6719	0.943	22.824	0.167	22.2249	0.785		20.1612	1.803	20.7432	3.92	20.5445	0.433		22.824	2.696	21.6728	2.499	22.8258	0.249		22.2386	0.029	22.2345	-0.059	22.2386	0.277
22.855	2.241	22.6322	2.002	22.9126	-0.365		22.8573	0.276	22.8573	1.516	22.6322	2.002		21.7035	0.928	22.8573	0.168	22.2573	0.767		20.1906	1.803	20.7735	4.039	20.5744	0.424		22.8573	2.694	21.7044	2.477	22.8591	0.251		22.271	0.03	22.2669	-0.057	22.271	0.279
22.8883	2.251	22.6651	2.001	22.9459	-0.362		22.8906	0.287	22.8906	1.534	22.6651	2.001		21.7351	0.908	22.8906	0.168	22.2897	0.733		20.22	1.833	20.8037	4.151	20.6043	0.418		22.8906	2.692	21.736	2.458	22.8924	0.251		22.3035	0.031	22.2993	-0.057	22.3035	0.278
22.9216	2.264	22.6981	1.999	22.9793	-0.363		22.9239	0.306	22.9239	1.548	22.6981	1.999		21.7667	0.887	22.9239	0.17	22.3221	0.69		20.2493	1.833	20.834	4.249	20.6343	0.419		22.9239	2.691	21.7676	2.435	22.9256	0.252		22.3359	0.034	22.3317	-0.056	22.3359	0.276
22.9548	2.275	22.731	1.997	23.0127	-0.365		22.9571	0.32	22.9571	1.561	22.731	1.997		21.7983	0.872	22.9571	0.177	22.3545	0.64		20.2787	1.866	20.8642	4.327	20.6642	0.414		22.9571	2.686	21.7992	2.416	22.9589	0.25		22.3683	0.037	22.3641	-0.052	22.3683	0.272
22.9881	2.285	22.764	1.996	23.046	-0.37		22.9904	0.339	22.9904	1.58	22.764	1.996		21.8299	0.87	22.9904	0.181	22.3869	0.585		20.3081	1.866	20.8944	4.371	20.6942	0.415		22.9904	2.681	21.8308	2.398	22.9922	0.247		22.4007	0.036	22.3965	-0.051	22.4007	0.273
23.0214	2.289	22.7969	1.987	23.0794	-0.378		23.0237	0.359	23.0237	1.601	22.7969	1.987		21.8615	0.877	23.0237	0.189	22.4193	0.525		20.3375	1.889	20.9247	4.387	20.7241	0.413		23.0237	2.672	21.8624	2.377	23.0254	0.248		22.4331	0.037	22.4289	-0.048	22.4331	0.273
23.0546	2.291	22.8299	1.983	23.1127	-0.385		23.0569	0.378	23.0569	1.624	22.8299	1.983		21.8931	0.892	23.0569	0.193	22.4517	0.462		20.3669	1.889	20.9549	4.36	20.7541	0.416		23.0569	2.666	21.894	2.353	23.0587	0.251		22.4656	0.038	22.4614	-0.047	22.4656	0.274
23.0879	2.286	22.8628	1.979	23.146	-0.387		23.0902	0.393	23.0902	1.647	22.8628	1.979		21.9247	0.909	23.0902	0.197	22.4841	0.399		20.3963	1.918	20.9852	4.292	20.784	0.413		23.0902	2.662	21.9256	2.329	23.092	0.253		22.498	0.038	22.4938	-0.042	22.498	0.277
23.1212	2.281	22.8957	1.974	23.1794	-0.392		23.1235	0.405	23.1235	1.666	22.8957	1.974		21.9563	0.932	23.1235	0.204	22.5165	0.341		20.4257	1.918	21.0154	4.177	20.814	0.409		23.1235	2.657	21.9572	2.307	23.1253	0.25		22.5304	0.043	22.5262	-0.04	22.5304	0.274
23.1545	2.27	22.9287	1.971	23.2128	-0.398		23.1567	0.421	23.1567	1.686	22.9287	1.971		21.9878	0.954	23.1567	0.216	22.5489	0.284		20.4551	1.959	21.0456	4.027	20.8439	0.405		23.1567	2.656	21.9888	2.287	23.1585	0.243		22.5628	0.047	22.5586	-0.036	22.5628	0.272
23.1877	2.259	22.9616	1.977	23.2461	-0.403		23.19	0.439	23.19	1.707	22.9616	1.977		22.0194	0.98	23.19	0.226	22.5813	0.235		20.4845	1.959	21.0759	3.849	20.8739	0.404		23.19	2.651	22.0204	2.268	23.1918	0.246		22.5952	0.047	22.591	-0.032	22.5952	0.272
23.221	2.25	22.9946	1.98	23.2795	-0.408		23.2233	0.456	23.2233	1.731	22.9946	1.98		22.051	1.002	23.2233	0.236	22.6137	0.19		20.5139	2.004	21.1061	3.628	20.9038	0.407		23.2233	2.646	22.052	2.248	23.2251	0.235		22.6276	0.049	22.6234	-0.026	22.6276	0.273
23.2542	2.24	23.0275	1.976	23.3128	-0.416		23.2566	0.472	23.2566	1.751	23.0275	1.976		22.0826	1.021	23.2566	0.244	22.6461	0.155		20.5433	2.004	21.1363	3.4	20.9338	0.41		23.2566	2.643	22.0835	2.223	23.2584	0.228		22.66	0.048	22.6558	-0.025	22.66	0.274
23.2875	2.231	23.0604	1.972	23.3462	-0.424		23.2898	0.49	23.2898	1.771	23.0604	1.972		22.1142	1.03	23.2898	0.251	22.6785	0.128		20.5726	2.07	21.1666	3.15	20.9637	0.415		23.2898	2.64	22.1151	2.204	23.2916	0.211		22.6925	0.048	22.6882	-0.022	22.6925	0.274
23.3208	2.215	23.0934	1.968	23.3795	-0.43		23.3231	0.51	23.3231	1.788	23.0934	1.968		22.1458	1.034	23.3231	0.253	22.7109	0.109		20.602	2.07	21.1968	2.874	20.9937	0.422		23.3231	2.636	22.1467	2.178	23.3249	0.208		22.7249	0.049	22.7206	-0.022	22.7249	0.276
23.3541	2.199	23.1263	1.959	23.4129	-0.43		23.3564	0.526	23.3564	1.81	23.1263	1.959		22.1774	1.03	23.3564	0.261	22.7433	0.103		20.6314	2.136	21.227	2.614	21.0236	0.428		23.3564	2.634	22.1783	2.154	23.3582	0.204		22.7573	0.049	22.7531	-0.022	22.7573	0.277
23.3873	2.185	23.1593	1.945	23.4462	-0.435		23.3896	0.541	23.3896	1.83	23.1593	1.945		22.209	1.02	23.3896	0.266	22.7757	0.106		20.6608	2.136	21.2573	2.349	21.0536	0.432		23.3896	2.631	22.2099	2.123	23.3915	0.203		22.7897	0.051	22.7855	-0.022	22.7897	0.277
23.4206	2.181	23.1922	1.932	23.4796	-0.436		23.4229	0.558	23.4229	1.848	23.1922	1.932		22.2406	1.012	23.4229	0.269	22.8081	0.115		20.6902	2.21	21.2875	2.104	21.0835	0.434		23.4229	2.627	22.2415	2.098	23.4247	0.197		22.8221	0.051	22.8179	-0.021	22.8221	0.277
23.4539	2.174	23.2252	1.923	23.5129	-0.437		23.4562	0.573	23.4562	1.866	23.2252	1.923		22.2722	1.006	23.4562	0.27	22.8405	0.133		20.7196	2.21	21.3178	1.851	21.1135	0.433		23.4562	2.622	22.2731	2.074	23.458	0.191		22.8546	0.052	22.8503	-0.021	22.8546	0.278
23.4871	2.17	23.2581	1.914	23.5463	-0.436		23.4895	0.588	23.4895	1.886	23.2581	1.914		22.3038	1.002	23.4895	0.279	22.8729	0.149		20.749	2.267	21.348	1.611	21.1434	0.427		23.4895	2.618	22.3047	2.05	23.4913	0.187		22.887	0.053	22.8827	-0.018	22.887	0.278
23.5204	2.166	23.291	1.91	23.5796	-0.426		23.5227	0.601	23.5227	1.906	23.291	1.91		22.3353	0.991	23.5227	0.286	22.9053	0.165		20.7784	2.267	21.3782	1.388	21.1734	0.42		23.5227	2.615	22.3363	2.022	23.5246	0.187		22.9194	0.054	22.9151	-0.018	22.9194	0.277
23.5537	2.167	23.324	1.897	23.613	-0.422		23.556	0.618	23.556	1.92	23.324	1.897		22.3669	0.979	23.556	0.289	22.9377	0.183		20.8077	2.303	21.4085	1.176	21.2033	0.413		23.556	2.61	22.3679	1.998	23.5578	0.185		22.9518	0.054	22.9475	-0.017	22.9518	0.277
23.5869	2.173	23.3569	1.886	23.6463	-0.419		23.5893	0.63	23.5893	1.934	23.3569	1.886		22.3985	0.967	23.5893	0.291	22.9701	0.195		20.8371	2.303	21.4387	0.976	21.2333	0.413		23.5893	2.609	22.3995	1.97	23.5911	0.184		22.9842	0.056	22.9799	-0.016	22.9842	0.275
23.6202	2.177	23.3899	1.877	23.6797	-0.418		23.6226	0.643	23.6226	1.945	23.3899	1.877		22.4301	0.965	23.6226	0.294	23.0024	0.204		20.8665	2.324	21.4689	0.821	21.2632	0.413		23.6226	2.608	22.4311	1.947	23.6244	0.181		23.0166	0.059	23.0124	-0.014	23.0166	0.277
23.6535	2.186	23.4228	1.865	23.713	-0.413		23.6558	0.655	23.6558	1.961	23.4228	1.865		22.4617	0.961	23.6558	0.297	23.0348	0.204		20.8959	2.324	21.4992	0.662	21.2932	0.414		23.6558	2.603	22.4627	1.917	23.6577	0.183		23.0491	0.064	23.0448	-0.013	23.0491	0.278
23.6867	2.194	23.4558	1.853	23.7464	-0.403		23.6891	0.672	23.6891	1.978	23.4558	1.853		22.4933	0.953	23.6891	0.293	23.0673	0.191		20.9253	2.319	21.5294	0.522	21.3231	0.416		23.6891	2.602	22.4943	1.892	23.6909	0.182		23.0815	0.069	23.0772	-0.012	23.0815	0.277
23.72	2.207	23.4887	1.84	23.7797	-0.391		23.7224	0.684	23.7224	1.987	23.4887	1.84		22.5249	0.941	23.7224	0.297	23.0996	0.164		20.9547	2.319	21.5597	0.407	21.353	0.419		23.7224	2.602	22.5259	1.866	23.7242	0.184		23.1139	0.074	23.1096	-0.01	23.1139	0.28
23.7533	2.222	23.5217	1.828	23.8131	-0.38		23.7556	0.697	23.7556	1.996	23.5217	1.828		22.5565	0.931	23.7556	0.302	23.132	0.118		20.9841	2.276	21.5899	0.314	21.383	0.419		23.7556	2.607	22.5574	1.843	23.7575	0.182		23.1463	0.074	23.142	-0.006	23.1463	0.28
23.7865	2.236	23.5546	1.819	23.8464	-0.369		23.7889	0.707	23.7889	2.003	23.5546	1.819		22.5881	0.925	23.7889	0.31	23.1644	0.057		21.0135	2.276	21.6201	0.236	21.4129	0.415		23.7889	2.611	22.589	1.818	23.7907	0.183		23.1787	0.079	23.1744	-0.004	23.1787	0.279
23.8198	2.249	23.5876	1.808	23.8798	-0.367		23.8222	0.72	23.8222	2.014	23.5876	1.808		22.6197	0.92	23.8222	0.315	23.1968	-0.017		21.0429	2.194	21.6504	0.174	21.4429	0.414		23.8222	2.613	22.6206	1.791	23.824	0.183		23.2112	0.084	23.2068	-0.002	23.2112	0.278
23.8531	2.264	23.6205	1.797	23.9131	-0.36		23.8554	0.732	23.8554	2.023	23.6205	1.797		22.6513	0.918	23.8554	0.317	23.2292	-0.104		21.0723	2.194	21.6806	0.132	21.4728	0.412		23.8554	2.619	22.6522	1.766	23.8573	0.183		23.2436	0.088	23.2392	0.002	23.2436	0.277
23.8863	2.279	23.6534	1.787	23.9465	-0.356		23.8887	0.74	23.8887	2.028	23.6534	1.787		22.6829	0.916	23.8887	0.318	23.2616	-0.198		21.1016	2.087	21.7109	0.095	21.5028	0.416		23.8887	2.619	22.6838	1.742	23.8906	0.185		23.276	0.091	23.2717	0.003	23.276	0.278
23.9196	2.294	23.6864	1.772	23.9798	-0.345		23.922	0.744	23.922	2.032	23.6864	1.772		22.7144	0.915	23.922	0.318	23.294	-0.289		21.131	2.087	21.7411	0.076	21.5327	0.419		23.922	2.616	22.7154	1.718	23.9238	0.185		23.3084	0.096	23.3041	0.006	23.3084	0.278
23.9529	2.308	23.7193	1.764	24.0132	-0.337		23.9553	0.741	23.9553	2.034	23.7193	1.764		22.746	0.914	23.9553	0.321	23.3264	-0.391		21.1604	1.956	21.7713	0.065	21.5627	0.423		23.9553	2.615	22.747	1.693	23.9571	0.188		23.3408	0.101	23.3365	0.012	23.3408	0.281
23.9861	2.33	23.7523	1.753	24.0465	-0.33		23.9885	0.738	23.9885	2.036	23.7523	1.753		22.7776	0.91	23.9885	0.321	23.3588	-0.491		21.1898	1.956	21.8016	0.07	21.5926	0.425		23.9885	2.615	22.7786	1.668	23.9904	0.192		23.3732	0.107	23.3689	0.015	23.3732	0.283
24.0194	2.351	23.7852	1.74	24.0799	-0.325		24.0218	0.734	24.0218	2.035	23.7852	1.74		22.8092	0.908	24.0218	0.321	23.3912	-0.58		21.2192	1.82	21.8318	0.092	21.6226	0.426		24.0218	2.62	22.8102	1.649	24.0237	0.19		23.4057	0.112	23.4013	0.019	23.4057	0.285
24.0527	2.373	23.8181	1.73	24.1133	-0.318		24.0551	0.727	24.0551	2.028	23.8181	1.73		22.8408	0.908	24.0551	0.319	23.4236	-0.661		21.2486	1.82	21.862	0.12	21.6525	0.424		24.0551	2.616	22.8418	1.628	24.0569	0.189		23.4381	0.117	23.4337	0.024	23.4381	0.283
24.086	2.394	23.8511	1.718	24.1466	-0.312		24.0883	0.718	24.0883	2.022	23.8511	1.718		22.8724	0.91	24.0883	0.314	23.456	-0.735		21.278	1.686	21.8923	0.163	21.6825	0.433		24.0883	2.619	22.8734	1.605	24.0902	0.187		23.4705	0.121	23.4661	0.027	23.4705	0.283
24.1192	2.407	23.884	1.704	24.18	-0.309		24.1216	0.705	24.1216	2.014	23.884	1.704		22.904	0.912	24.1216	0.307	23.4884	-0.792		21.3074	1.686	21.9225	0.221	21.7124	0.438		24.1216	2.622	22.905	1.583	24.1235	0.19		23.5029	0.126	23.4985	0.033	23.5029	0.282
24.1525	2.421	23.917	1.691	24.2133	-0.303		24.1549	0.694	24.1549	2	23.917	1.691		22.9356	0.916	24.1549	0.306	23.5208	-0.834		21.3368	1.561	21.9528	0.292	21.7424	0.441		24.1549	2.623	22.9366	1.56	24.1567	0.195		23.5353	0.13	23.5309	0.039	23.5353	0.28
24.1857	2.433	23.9499	1.676	24.2467	-0.3		24.1882	0.684	24.1882	1.982	23.9499	1.676		22.9672	0.918	24.1882	0.308	23.5532	-0.854		21.3662	1.561	21.983	0.374	21.7723	0.439		24.1882	2.624	22.9682	1.54	24.19	0.195		23.5678	0.135	23.5634	0.046	23.5678	0.279
24.219	2.446	23.9829	1.667	24.28	-0.295		24.2214	0.665	24.2214	1.968	23.9829	1.667		22.9988	0.926	24.2214	0.314	23.5856	-0.854		21.3955	1.452	22.0132	0.466	21.8023	0.438		24.2214	2.625	22.9997	1.519	24.2233	0.197		23.6002	0.142	23.5958	0.052	23.6002	0.281
24.2523	2.459	24.0158	1.659	24.3134	-0.286		24.2547	0.645	24.2547	1.952	24.0158	1.659		23.0304	0.931	24.2547	0.315	23.618	-0.831		21.4249	1.452	22.0435	0.554	21.8322	0.444		24.2547	2.629	23.0313	1.499	24.2566	0.2		23.6326	0.146	23.6282	0.059	23.6326	0.283
24.2856	2.471	24.0488	1.651	24.3467	-0.281		24.288	0.62	24.288	1.936	24.0488	1.651		23.062	0.94	24.288	0.309	23.6504	-0.786		21.4543	1.364	22.0737	0.629	21.8622	0.442		24.288	2.627	23.0629	1.481	24.2899	0.206		23.665	0.149	23.6606	0.065	23.665	0.285
24.3188	2.483	24.0817	1.636	24.3801	-0.277		24.3212	0.598	24.3212	1.916	24.0817	1.636		23.0936	0.951	24.3212	0.304	23.6828	-0.723		21.4837	1.364	22.104	0.695	21.8921	0.444		24.3212	2.627	23.0945	1.458	24.3231	0.215		23.6974	0.153	23.693	0.067	23.6974	0.286
24.3521	2.489	24.1146	1.626	24.4134	-0.276		24.3545	0.571	24.3545	1.9	24.1146	1.626		23.1251	0.961	24.3545	0.298	23.7152	-0.637		21.5131	1.299	22.1342	0.741	21.9221	0.446		24.3545	2.627	23.1261	1.44	24.3564	0.219		23.7298	0.156	23.7254	0.071	23.7298	0.285
24.3854	2.497	24.1476	1.621	24.4468	-0.271		24.3878	0.543	24.3878	1.888	24.1476	1.621		23.1567	0.973	24.3878	0.297	23.7476	-0.534		21.5425	1.299	22.1644	0.77	21.952	0.449		24.3878	2.627	23.1577	1.422	24.3897	0.229		23.7623	0.155	23.7578	0.073	23.7623	0.285
24.4186	2.507	24.1805	1.606	24.4801	-0.267		24.4211	0.512	24.4211	1.87	24.1805	1.606		23.1883	0.985	24.4211	0.297	23.78	-0.411		21.5719	1.255	22.1947	0.784	21.982	0.448		24.4211	2.624	23.1893	1.409	24.4229	0.235		23.7947	0.158	23.7902	0.075	23.7947	0.288
24.4519	2.518	24.2135	1.599	24.5135	-0.263		24.4543	0.489	24.4543	1.847	24.2135	1.599		23.2199	0.999	24.4543	0.29	23.8124	-0.281		21.6013	1.255	22.2249	0.785	22.0119	0.448		24.4543	2.628	23.2209	1.397	24.4562	0.244		23.8271	0.161	23.8226	0.072	23.8271	0.29
24.4852	2.526	24.2464	1.595	24.5468	-0.253		24.4876	0.468	24.4876	1.825	24.2464	1.595		23.2515	1.01	24.4876	0.291	23.8448	-0.129		21.6307	1.23	22.2551	0.768	22.0419	0.45		24.4876	2.629	23.2525	1.38	24.4895	0.252		23.8595	0.161	23.8551	0.074	23.8595	0.292
24.5184	2.537	24.2794	1.59	24.5802	-0.235		24.5209	0.448	24.5209	1.807	24.2794	1.59		23.2831	1.02	24.5209	0.287	23.8772	0.033		21.66	1.23	22.2854	0.739	22.0718	0.453		24.5209	2.631	23.2841	1.363	24.5228	0.269		23.8919	0.161	23.8875	0.077	23.8919	0.292
24.5517	2.551	24.3123	1.584	24.6135	-0.211		24.5541	0.429	24.5541	1.791	24.3123	1.584		23.3147	1.029	24.5541	0.294	23.9096	0.203		21.6894	1.222	22.3156	0.7	22.1017	0.451		24.5541	2.627	23.3157	1.34	24.556	0.288		23.9244	0.163	23.9199	0.075	23.9244	0.289
24.585	2.572	24.3453	1.574	24.6469	-0.184		24.5874	0.411	24.5874	1.769	24.3453	1.574		23.3463	1.039	24.5874	0.291	23.942	0.362		21.7188	1.222	22.3459	0.653	22.1317	0.454		24.5874	2.62	23.3473	1.323	24.5893	0.309		23.9568	0.162	23.9523	0.073	23.9568	0.288
24.6182	2.595	24.3782	1.558	24.6802	-0.146		24.6207	0.397	24.6207	1.751	24.3782	1.558		23.3779	1.045	24.6207	0.287	23.9744	0.527		21.7482	1.221	22.3761	0.605	22.1617	0.456		24.6207	2.612	23.3789	1.304	24.6226	0.331		23.9892	0.163	23.9847	0.072	23.9892	0.287
24.6515	2.635	24.4111	1.547	24.7136	-0.093		24.6539	0.387	24.6539	1.728	24.4111	1.547		23.4095	1.053	24.6539	0.286	24.0068	0.7		21.7776	1.221	22.4063	0.55	22.1916	0.455		24.6539	2.602	23.4105	1.286	24.6559	0.354		24.0216	0.164	24.0171	0.067	24.0216	0.287
24.6848	2.693	24.4441	1.544	24.7469	-0.023		24.6872	0.381	24.6872	1.707	24.4441	1.544		23.4411	1.055	24.6872	0.288	24.0392	0.865		21.807	1.24	22.4366	0.491	22.2216	0.454		24.6872	2.594	23.4421	1.267	24.6891	0.376		24.054	0.16	24.0495	0.063	24.054	0.288
24.718	2.766	24.477	1.54	24.7803	0.063		24.7205	0.384	24.7205	1.683	24.477	1.54		23.4727	1.062	24.7205	0.294	24.0716	1.01		21.8364	1.24	22.4668	0.433	22.2515	0.452		24.7205	2.579	23.4736	1.253	24.7224	0.402		24.0864	0.156	24.0819	0.062	24.0864	0.289
24.7513	2.861	24.51	1.53	24.8136	0.17		24.7538	0.393	24.7538	1.663	24.51	1.53		23.5042	1.068	24.7538	0.298	24.104	1.169		21.8658	1.278	22.497	0.375	22.2814	0.453		24.7538	2.56	23.5052	1.238	24.7557	0.427		24.1188	0.149	24.1144	0.063	24.1188	0.29
24.7846	2.976	24.5429	1.519	24.847	0.302		24.787	0.409	24.787	1.639	24.5429	1.519		23.5358	1.078	24.787	0.307	24.1364	1.325		21.8952	1.278	22.5273	0.32	22.3114	0.455		24.787	2.536	23.5368	1.222	24.789	0.448		24.1513	0.147	24.1468	0.065	24.1513	0.287
24.8178	3.116	24.5758	1.508	24.8803	0.459		24.8203	0.438	24.8203	1.616	24.5758	1.508		23.5674	1.083	24.8203	0.314	24.1688	1.471		21.9245	1.331	22.5575	0.268	22.3413	0.459		24.8203	2.507	23.5684	1.206	24.8222	0.474		24.1837	0.148	24.1792	0.064	24.1837	0.288
24.8511	3.283	24.6088	1.497	24.9137	0.65		24.8536	0.48	24.8536	1.595	24.6088	1.497		23.599	1.094	24.8536	0.32	24.2012	1.602		21.9539	1.331	22.5878	0.227	22.3713	0.456		24.8536	2.474	23.6	1.193	24.8555	0.495		24.2161	0.147	24.2116	0.063	24.2161	0.291
24.8844	3.474	24.6417	1.49	24.947	0.871		24.8868	0.53	24.8868	1.57	24.6417	1.49		23.6306	1.104	24.8868	0.328	24.2336	1.737		21.9833	1.389	22.618	0.185	22.4012	0.455		24.8868	2.434	23.6316	1.178	24.8888	0.516		24.2485	0.143	24.244	0.061	24.2485	0.291
24.9176	3.689	24.6747	1.481	24.9804	1.11		24.9201	0.594	24.9201	1.547	24.6747	1.481		23.6622	1.122	24.9201	0.339	24.266	1.869		22.0127	1.389	22.6482	0.153	22.4312	0.457		24.9201	2.382	23.6632	1.163	24.922	0.522		24.2809	0.139	24.2764	0.053	24.2809	0.294
24.9509	3.935	24.7076	1.47	25.0138	1.4		24.9534	0.672	24.9534	1.519	24.7076	1.47		23.6938	1.135	24.9534	0.353	24.2984	2		22.0421	1.441	22.6785	0.128	22.4611	0.454		24.9534	2.323	23.6948	1.144	24.9553	0.528		24.3134	0.131	24.3088	0.048	24.3134	0.294
24.9842	4.195	24.7406	1.465	25.0471	1.715		24.9867	0.766	24.9867	1.493	24.7406	1.465		23.7254	1.157	24.9867	0.366	24.3308	2.123		22.0715	1.441	22.7087	0.109	22.4911	0.453		24.9867	2.251	23.7264	1.125	24.9886	0.522		24.3458	0.123	24.3412	0.044	24.3458	0.295
25.0175	4.483	24.7735	1.454	25.0804	2.064		25.0199	0.869	25.0199	1.46	24.7735	1.454		23.757	1.176	25.0199	0.384	24.3632	2.252		22.1009	1.493	22.7389	0.103	22.521	0.449		25.0199	2.168	23.758	1.108	25.0219	0.509		24.3782	0.115	24.3737	0.038	24.3782	0.296
25.0507	4.776	24.8065	1.434	25.1138	2.444		25.0532	0.985	25.0532	1.435	24.8065	1.434		23.7886	1.199	25.0532	0.407	24.3956	2.38		22.1303	1.493	22.7692	0.105	22.551	0.443		25.0532	2.072	23.7896	1.095	25.0552	0.483		24.4106	0.109	24.4061	0.035	24.4106	0.296
25.084	5.096	24.8394	1.415	25.1471	2.859		25.0865	1.113	25.0865	1.403	24.8394	1.415		23.8202	1.22	25.0865	0.438	24.4279	2.508		22.1597	1.54	22.7994	0.111	22.5809	0.439		25.0865	1.969	23.8212	1.081	25.0884	0.451		24.443	0.103	24.4385	0.03	24.443	0.298
25.1172	5.413	24.8723	1.405	25.1805	3.309		25.1197	1.251	25.1197	1.374	24.8723	1.405		23.8517	1.25	25.1197	0.467	24.4603	2.633		22.1891	1.54	22.8297	0.125	22.6109	0.435		25.1197	1.858	23.8528	1.067	25.1217	0.407		24.4754	0.098	24.4709	0.025	24.4754	0.3
25.1505	5.746	24.9053	1.391	25.2139	3.79		25.153	1.394	25.153	1.339	24.9053	1.391		23.8833	1.281	25.153	0.5	24.4928	2.76		22.2185	1.569	22.8599	0.141	22.6408	0.435		25.153	1.725	23.8844	1.054	25.155	0.351		24.5079	0.09	24.5033	0.02	24.5079	0.301
25.1838	6.074	24.9382	1.379	25.2472	4.277		25.1863	1.561	25.1863	1.311	24.9382	1.379		23.9149	1.313	25.1863	0.535	24.5252	2.891		22.2478	1.569	22.8901	0.157	22.6708	0.435		25.1863	1.58	23.9159	1.044	25.1882	0.282		24.5403	0.083	24.5357	0.015	24.5403	0.3
25.2171	6.39	24.9712	1.364	25.2806	4.79		25.2196	1.726	25.2196	1.286	24.9712	1.364		23.9465	1.347	25.2196	0.573	24.5575	3.019		22.2772	1.573	22.9204	0.176	22.7007	0.432		25.2196	1.43	23.9475	1.034	25.2215	0.206		24.5727	0.078	24.5681	0.011	24.5727	0.3
25.2503	6.712	25.0041	1.353	25.3139	5.287		25.2528	1.9	25.2528	1.258	25.0041	1.353		23.9781	1.384	25.2528	0.613	24.5899	3.141		22.3066	1.573	22.9506	0.188	22.7307	0.434		25.2528	1.272	23.9791	1.022	25.2548	0.12		24.6051	0.071	24.6005	0.01	24.6051	0.301
25.2836	7.015	25.0371	1.336	25.3473	5.8		25.2861	2.075	25.2861	1.233	25.0371	1.336		24.0097	1.432	25.2861	0.661	24.6223	3.265		22.336	1.567	22.9809	0.199	22.7606	0.433		25.2861	1.112	24.0107	1.01	25.2881	0.022		24.6375	0.064	24.633	0.005	24.6375	0.3
25.3169	7.298	25.07	1.319	25.3806	6.293		25.3194	2.255	25.3194	1.211	25.07	1.319		24.0413	1.487	25.3194	0.712	24.6547	3.387		22.3654	1.567	23.0111	0.205	22.7906	0.437		25.3194	0.936	24.0423	0.994	25.3213	-0.086		24.67	0.051	24.6654	0	24.67	0.3
25.3501	7.562	25.1029	1.297	25.414	6.772		25.3527	2.44	25.3527	1.194	25.1029	1.297		24.0729	1.549	25.3527	0.76	24.6871	3.515		22.3948	1.56	23.0413	0.202	22.8205	0.433		25.3527	0.761	24.0739	0.977	25.3546	-0.198		24.7024	0.034	24.6978	-0.006	24.7024	0.299
25.3834	7.801	25.1359	1.28	25.4473	7.224		25.3859	2.616	25.3859	1.179	25.1359	1.28		24.1045	1.619	25.3859	0.801	24.7195	3.626		22.4242	1.56	23.0716	0.188	22.8505	0.431		25.3859	0.584	24.1055	0.963	25.3879	-0.315		24.7348	0.013	24.7302	-0.016	24.7348	0.299
25.4167	8.003	25.1688	1.261	25.4807	7.637		25.4192	2.787	25.4192	1.165	25.1688	1.261		24.1361	1.7	25.4192	0.838	24.7519	3.738		22.4536	1.56	23.1018	0.161	22.8804	0.43		25.4192	0.412	24.1371	0.955	25.4212	-0.428		24.7672	-0.016	24.7626	-0.031	24.7672	0.294
25.4499	8.182	25.2018	1.242	25.514	7.998		25.4525	2.953	25.4525	1.156	25.2018	1.242		24.1677	1.801	25.4525	0.878	24.7843	3.85		22.4829	1.56	23.132	0.118	22.9104	0.424		25.4525	0.251	24.1687	0.945	25.4544	-0.544		24.7996	-0.058	24.795	-0.048	24.7996	0.288
25.4832	8.323	25.2347	1.222	25.5474	8.309		25.4857	3.101	25.4857	1.158	25.2347	1.222		24.1993	1.906	25.4857	0.916	24.8167	3.962		22.5123	1.561	23.1623	0.063	22.9403	0.421		25.4857	0.094	24.2003	0.936	25.4877	-0.658		24.832	-0.11	24.8274	-0.076	24.832	0.279
25.5165	8.444	25.2677	1.2	25.5807	8.556		25.519	3.237	25.519	1.164	25.2677	1.2		24.2309	2.025	25.519	0.954	24.8491	4.069		22.5417	1.561	23.1925	-0.007	22.9703	0.421		25.519	-0.046	24.2319	0.927	25.521	-0.764		24.8645	-0.186	24.8598	-0.117	24.8645	0.265
25.5497	8.527	25.3006	1.182	25.6141	8.747		25.5523	3.345	25.5523	1.177	25.3006	1.182		24.2624	2.157	25.5523	0.983	24.8815	4.19		22.5711	1.577	23.2228	-0.086	23.0002	0.422		25.5523	-0.172	24.2635	0.917	25.5542	-0.855		24.8969	-0.287	24.8922	-0.171	24.8969	0.244
25.583	8.584	25.3335	1.164	25.6474	8.858		25.5856	3.438	25.5856	1.188	25.3335	1.164		24.294	2.307	25.5856	1.008	24.9139	4.327		22.6005	1.577	23.253	-0.173	23.0301	0.42		25.5856	-0.277	24.2951	0.903	25.5875	-0.941		24.9293	-0.412	24.9246	-0.243	24.9293	0.217
25.6163	8.613	25.3665	1.153	25.6808	8.898		25.6188	3.508	25.6188	1.21	25.3665	1.153		24.3256	2.475	25.6188	1.022	24.9463	4.485		22.6299	1.604	23.2832	-0.258	23.0601	0.419		25.6188	-0.356	24.3267	0.891	25.6208	-1.01		24.9617	-0.581	24.9571	-0.336	24.9617	0.178
25.6495	8.612	25.3994	1.143	25.7141	8.869		25.6521	3.556	25.6521	1.24	25.3994	1.143		24.3572	2.654	25.6521	1.028	24.9787	4.655		22.6593	1.604	23.3135	-0.348	23.09	0.416		25.6521	-0.42	24.3583	0.874	25.6541	-1.069		24.9941	-0.786	24.9895	-0.458	24.9941	0.13
25.6828	8.59	25.4324	1.132	25.7475	8.776		25.6854	3.576	25.6854	1.27	25.4324	1.132		24.3888	2.843	25.6854	1.032	25.0111	4.869		22.6887	1.635	23.3437	-0.445	23.12	0.414		25.6854	-0.455	24.3898	0.862	25.6873	-1.112		25.0266	-1.026	25.0219	-0.603	25.0266	0.069
25.7161	8.539	25.4653	1.118	25.7808	8.61		25.7186	3.577	25.7186	1.304	25.4653	1.118		24.4204	3.041	25.7186	1.028	25.0435	5.127		22.7181	1.635	23.374	-0.532	23.1499	0.408		25.7186	-0.471	24.4214	0.847	25.7206	-1.142		25.059	-1.321	25.0543	-0.777	25.059	-0.005
25.7493	8.474	25.4983	1.102	25.8142	8.383		25.7519	3.551	25.7519	1.344	25.4983	1.102		24.452	3.233	25.7519	1.015	25.0759	5.412		22.7475	1.685	23.4042	-0.612	23.1799	0.405		25.7519	-0.457	24.453	0.838	25.7539	-1.153		25.0914	-1.651	25.0867	-0.986	25.0914	-0.089
25.7826	8.386	25.5312	1.087	25.8475	8.105		25.7852	3.505	25.7852	1.387	25.5312	1.087		24.4836	3.436	25.7852	0.993	25.1083	5.739		22.7768	1.685	23.4344	-0.689	23.2098	0.403		25.7852	-0.422	24.4846	0.827	25.7872	-1.143		25.1238	-2.021	25.1191	-1.223	25.1238	-0.192
25.8159	8.29	25.5642	1.08	25.8809	7.775		25.8184	3.436	25.8184	1.431	25.5642	1.08		24.5152	3.62	25.8184	0.971	25.1407	6.145		22.8062	1.754	23.4647	-0.754	23.2398	0.405		25.8184	-0.361	24.5162	0.815	25.8204	-1.122		25.1562	-2.444	25.1515	-1.471	25.1562	-0.306
25.8492	8.178	25.5971	1.074	25.9142	7.397		25.8517	3.344	25.8517	1.471	25.5971	1.074		24.5468	3.808	25.8517	0.941	25.1731	6.589		22.8356	1.754	23.4949	-0.801	23.2697	0.404		25.8517	-0.276	24.5478	0.8	25.8537	-1.08		25.1886	-2.892	25.1839	-1.765	25.1886	-0.43
25.8824	8.061	25.63	1.065	25.9476	6.988		25.885	3.224	25.885	1.512	25.63	1.065		24.5784	3.936	25.885	0.907	25.2055	7.1		22.865	1.823	23.5251	-0.838	23.2997	0.401		25.885	-0.172	24.5794	0.779	25.887	-1.026		25.2211	-3.367	25.2164	-2.073	25.2211	-0.568
25.9157	7.934	25.663	1.061	25.9809	6.536		25.9183	3.096	25.9183	1.544	25.663	1.061				25.9183	0.865	25.2379	7.623		22.8944	1.823	23.5554	-0.855	23.3296	0.398		25.9183	-0.044	24.611	0.759	25.9203	-0.953		25.2535	-3.865	25.2488	-2.382	25.2535	-0.707
25.9489	7.806	25.6959	1.059	26.0143	6.096		25.9515	2.945	25.9515	1.577	25.6959	1.059				25.9515	0.821	25.2703	8.222		22.9238	1.889	23.5856	-0.854	23.3596	0.393		25.9515	0.089	24.6426	0.738	25.9535	-0.871		25.2859	-4.383	25.2812	-2.723	25.2859	-0.854
25.9822	7.677	25.7289	1.06	26.0477	5.615		25.9848	2.787	25.9848	1.606	25.7289	1.06				25.9848	0.781	25.3027	8.866		22.9532	1.889	23.6158	-0.834	23.3895	0.39		25.9848	0.232	24.6742	0.71	25.9868	-0.784		25.3183	-4.876	25.3136	-3.073	25.3183	-1.01
26.0155	7.556	25.7618	1.061	26.081	5.151		26.0181	2.616	26.0181	1.629	25.7618	1.061				26.0181	0.744	25.3351	9.516		22.9826	1.96	23.6461	-0.794	23.4195	0.384		26.0181	0.388	24.7058	0.678	26.0201	-0.689		25.3507	-5.397	25.346	-3.403	25.3507	-1.163
26.0487	7.435	25.7948	1.071	26.1144	4.679		26.0513	2.442	26.0513	1.645	25.7948	1.071				26.0513	0.71	25.3675	10.182		23.012	1.96	23.6763	-0.738	23.4494	0.383		26.0513	0.55	24.7374	0.636	26.0534	-0.589		25.3832	-5.913	25.3784	-3.762	25.3832	-1.315
26.082	7.318	25.8277	1.081	26.1477	4.224		26.0846	2.264	26.0846	1.661	25.8277	1.081				26.0846	0.67	25.3999	10.867		23.0414	2.025	23.7066	-0.662	23.4794	0.385		26.0846	0.715	24.769	0.59	26.0866	-0.49		25.4156	-6.413	25.4108	-4.112	25.4156	-1.471
26.1153	7.205	25.8606	1.086	26.181	3.782		26.1179	2.086	26.1179	1.675	25.8606	1.086				26.1179	0.63	25.4323	11.528		23.0707	2.025	23.7368	-0.572	23.5093	0.382		26.1179	0.881	24.8006	0.54	26.1199	-0.397		25.448	-6.922	25.4432	-4.401	25.448	-1.606
26.1486	7.107	25.8936	1.089	26.2144	3.359		26.1512	1.908	26.1512	1.684	25.8936	1.089				26.1512	0.592	25.4647	12.182		23.1001	2.081	23.767	-0.465	23.5393	0.383		26.1512	1.036	24.8321	0.478	26.1532	-0.298		25.4804	-7.404	25.4757	-4.726	25.4804	-1.75
26.1818	7.019	25.9265	1.098	26.2478	2.953		26.1844	1.753	26.1844	1.686	25.9265	1.098				26.1844	0.559	25.4971	12.758		23.1295	2.081	23.7973	-0.337	23.5692	0.384		26.1844	1.192	24.8637	0.412	26.1865	-0.198		25.5128	-7.82	25.5081	-5.027	25.5128	-1.888
26.2151	6.943	25.9595	1.109	26.2811	2.584		26.2177	1.619	26.2177	1.685	25.9595	1.109				26.2177	0.524	25.5295	13.317		23.1589	2.12	23.8275	-0.207	23.5992	0.387		26.2177	1.34	24.8953	0.333	26.2197	-0.105		25.5452	-8.222	25.5405	-5.283	25.5452	-2.018
26.2484	6.877	25.9924	1.117	26.3145	2.226		26.251	1.497	26.251	1.686	25.9924	1.117				26.251	0.493	25.5619	13.81		23.1883	2.12	23.8577	-0.061	23.6291	0.386		26.251	1.484	24.9269	0.245	26.253	-0.018		25.5777	-8.567	25.5729	-5.531	25.5777	-2.13
26.2816	6.824	26.0254	1.129	26.3478	1.913		26.2842	1.345	26.2842	1.683	26.0254	1.129				26.2842	0.46	25.5943	14.227		23.2177	2.132	23.888	0.081	23.6591	0.386		26.2842	1.616	24.9585	0.145	26.2863	0.065		25.6101	-8.843	25.6053	-5.74	25.6101	-2.233
26.3149	6.784	26.0583	1.14	26.3812	1.62		26.3175	1.188	26.3175	1.679	26.0583	1.14				26.3175	0.432	25.6267	14.535		23.2471	2.132	23.9182	0.241	23.689	0.383		26.3175	1.733	24.9901	0.034	26.3195	0.143		25.6425	-9.078	25.6377	-5.896	25.6425	-2.313
26.3482	6.758	26.0912	1.149	26.4145	1.353		26.3508	1.043	26.3508	1.679	26.0912	1.149				26.3508	0.405	25.6591	14.749		23.2765	2.139	23.9485	0.399	23.7189	0.38		26.3508	1.846	25.0217	-0.091	26.3528	0.215		25.6749	-9.241	25.6701	-6.021	25.6749	-2.373
26.3814	6.742	26.1242	1.156	26.4479	1.114		26.3841	0.917	26.3841	1.676	26.1242	1.156				26.3841	0.384	25.6915	14.871		23.3059	2.139	23.9787	0.55	23.7489	0.379		26.3841	1.952			26.3861	0.275		25.7073	-9.33	25.7025	-6.105	25.7073	-2.419
26.4147	6.741	26.1571	1.162	26.4812	0.903		26.4173	0.805	26.4173	1.669	26.1571	1.162				26.4173	0.368	25.7239	14.876		23.3352	2.125	24.0089	0.713	23.7788	0.383		26.4173	2.049			26.4194	0.337		25.7398	-9.355	25.735	-6.146	25.7398	-2.441
26.448	6.743	26.1901	1.167	26.5146	0.715		26.4506	0.706	26.4506	1.662	26.1901	1.167				26.4506	0.354	25.7563	14.777		23.3646	2.125	24.0392	0.865	23.8088	0.388		26.4506	2.128			26.4526	0.388		25.7722	-9.305	25.7674	-6.143	25.7722	-2.444
26.4812	6.754	26.223	1.175	26.5479	0.546		26.4839	0.613	26.4839	1.657	26.223	1.175				26.4839	0.341	25.7887	14.566		23.394	2.101	24.0694	0.999	23.8388	0.388		26.4839	2.197			26.4859	0.436		25.8046	-9.18	25.7998	-6.092	25.8046	-2.426
26.5145	6.771	26.256	1.177	26.5813	0.4		26.5171	0.53	26.5171	1.655	26.256	1.177				26.5171	0.329	25.8211	14.25		23.4234	2.101	24.0997	1.146	23.8687	0.387		26.5171	2.26			26.5192	0.476		25.837	-8.983	25.8322	-5.996	25.837	-2.387
26.5478	6.801	26.2889	1.181	26.6146	0.277		26.5504	0.457	26.5504	1.645	26.2889	1.181				26.5504	0.319	25.8535	13.833		23.4528	2.075	24.1299	1.297	23.8986	0.384		26.5504	2.314			26.5525	0.512		25.8694	-8.719	25.8646	-5.856	25.8694	-2.33
26.581	6.826	26.3219	1.183	26.648	0.168		26.5837	0.399	26.5837	1.634	26.3219	1.183				26.5837	0.306	25.8859	13.357		23.4822	2.075	24.1601	1.43	23.9286	0.387		26.5837	2.359			26.5857	0.546		25.9018	-8.414	25.897	-5.671	25.9018	-2.252
26.6143	6.856	26.3548	1.189	26.6813	0.071		26.6169	0.347	26.6169	1.627	26.3548	1.189				26.6169	0.3	25.9183	12.802		23.5116	2.044	24.1904	1.561	23.9585	0.391		26.6169	2.404			26.619	0.574		25.9342	-8.036	25.9294	-5.462	25.9342	-2.161
26.6476	6.888	26.3877	1.193	26.7147	-0.008		26.6502	0.305	26.6502	1.625	26.3877	1.193				26.6502	0.294	25.9506	12.165		23.541	2.044	24.2206	1.688	23.9885	0.391		26.6502	2.443			26.6523	0.602		25.9667	-7.607	25.9618	-5.215	25.9667	-2.055
26.6808	6.926	26.4207	1.19	26.748	-0.08		26.6835	0.258	26.6835	1.626	26.4207	1.19				26.6835	0.296	25.983	11.484		23.5704	2.023	24.2508	1.811	24.0184	0.391		26.6835	2.481			26.6856	0.625		25.9991	-7.166	25.9942	-4.937	25.9991	-1.935
26.7141	6.96	26.4536	1.188	26.7814	-0.138		26.7168	0.223	26.7168	1.62	26.4536	1.188				26.7168	0.295	26.0155	10.79		23.5998	2.023	24.2811	1.924	24.0484	0.391		26.7168	2.511			26.7188	0.647		26.0315	-6.68	26.0267	-4.646	26.0315	-1.802
26.7474	6.99	26.4866	1.19	26.8147	-0.193		26.75	0.193	26.75	1.611	26.4866	1.19				26.75	0.294	26.0479	10.047		23.6291	2.008	24.3113	2.043	24.0783	0.395		26.75	2.534			26.7521	0.665		26.0639	-6.175	26.0591	-4.333	26.0639	-1.67
26.7807	7.02	26.5195	1.192	26.8481	-0.238		26.7833	0.172	26.7833	1.608	26.5195	1.192				26.7833	0.29	26.0802	9.325		23.6585	2.008	24.3416	2.169	24.1083	0.397		26.7833	2.553			26.7854	0.686		26.0963	-5.673	26.0915	-4	26.0963	-1.525
26.8139	7.046	26.5525	1.191	26.8814	-0.271		26.8166	0.15	26.8166	1.604	26.5525	1.191				26.8166	0.292	26.1126	8.571		23.6879	2.014	24.3718	2.29	24.1382	0.396		26.8166	2.567			26.8187	0.701		26.1288	-5.16	26.1239	-3.678	26.1288	-1.374
26.8472	7.063	26.5854	1.192	26.9148	-0.302		26.8498	0.136	26.8498	1.602	26.5854	1.192				26.8498	0.298	26.145	7.854		23.7173	2.014	24.402	2.403	24.1682	0.393		26.8498	2.579			26.8519	0.713		26.1612	-4.648	26.1563	-3.351	26.1612	-1.234
26.8804	7.075	26.6183	1.191	26.9481	-0.327		26.8831	0.124	26.8831	1.6	26.6183	1.191				26.8831	0.292	26.1774	7.169		23.7467	2.034	24.4323	2.523	24.1981	0.396		26.8831	2.59			26.8852	0.721		26.1936	-4.167	26.1887	-3.018	26.1936	-1.083
26.9137	7.082	26.6513	1.192	26.9815	-0.35		26.9164	0.112	26.9164	1.596	26.6513	1.192				26.9164	0.292	26.2098	6.493		23.7761	2.034	24.4625	2.642	24.2281	0.402		26.9164	2.601			26.9185	0.729		26.226	-3.699	26.2211	-2.711	26.226	-0.937
26.947	7.09	26.6842	1.192	27.0148	-0.371		26.9497	0.103	26.9497	1.589	26.6842	1.192				26.9497	0.29	26.2422	5.878		23.8055	2.085	24.4928	2.76	24.258	0.405		26.9497	2.611			26.9518	0.739		26.2584	-3.249	26.2535	-2.411	26.2584	-0.807
26.9803	7.092	26.7172	1.191	27.0482	-0.388		26.9829	0.095	26.9829	1.585	26.7172	1.191				26.9829	0.297	26.2746	5.288		23.8349	2.085	24.523	2.881	24.288	0.407		26.9829	2.619			26.985	0.747		26.2908	-2.843	26.2859	-2.123	26.2908	-0.677
27.0135	7.088	26.7501	1.186	27.0816	-0.403		27.0162	0.091	27.0162	1.578	26.7501	1.186				27.0162	0.297	26.307	4.749		23.8643	2.199	24.5532	3.002	24.3179	0.415		27.0162	2.624			27.0183	0.755		26.3233	-2.465	26.3184	-1.863	26.3233	-0.551
27.0468	7.078	26.7831	1.177	27.1149	-0.408		27.0495	0.083	27.0495	1.572	26.7831	1.177				27.0495	0.301	26.3394	4.271		23.8937	2.199	24.5835	3.119	24.3479	0.427		27.0495	2.632			27.0516	0.763		26.3557	-2.109	26.3508	-1.622	26.3557	-0.443
27.0801	7.058	26.816	1.17	27.1483	-0.416		27.0828	0.077	27.0828	1.563	26.816	1.17				27.0828	0.304	26.3718	3.802		23.923	2.402	24.6137	3.235	24.3778	0.437		27.0828	2.638			27.0848	0.772		26.3881	-1.804	26.3832	-1.41	26.3881	-0.34
	--	26.8489	1.164	27.1816	-0.422		27.116	0.073	27.116	1.558	26.8489	1.164				27.116	0.312	26.4042	3.417		23.9524	2.402	24.6439	3.349	24.4078	0.447		27.116	2.641			27.1181	0.777		26.4205	-1.528	26.4156	-1.214	26.4205	-0.25
	--	26.8819	1.163	27.215	-0.433		27.1493	0.067	27.1493	1.554	26.8819	1.163				27.1493	0.315	26.4366	3.067		23.9818	2.735	24.6742	3.462	24.4377	0.455		27.1493	2.648			27.1514	0.785		26.4529	-1.288	26.448	-1.035	26.4529	-0.171
	--	26.9148	1.163	27.2483	-0.438		27.1826	0.062	27.1826	1.548	26.9148	1.163				27.1826	0.317	26.469	2.752		24.0112	2.735	24.7044	3.575	24.4677	0.467		27.1826	2.653			27.1847	0.793		26.4854	-1.073	26.4804	-0.875	26.4854	-0.099
	--	26.9478	1.16	27.2817	-0.445		27.2158	0.062	27.2158	1.535	26.9478	1.16				27.2158	0.317	26.5014	2.475		24.0406	3.206	24.7346	3.68	24.4976	0.485		27.2158	2.656			27.2179	0.805		26.5178	-0.893	26.5128	-0.74	26.5178	-0.032
	--	26.9807	1.155	27.315	-0.455		27.2491	0.064	27.2491	1.527	26.9807	1.155				27.2491	0.325	26.5338	2.241		24.07	3.206	24.7649	3.787	24.5276	0.505		27.2491	2.659			27.2512	0.817		26.5502	-0.736	26.5452	-0.62	26.5502	0.022
	--	27.0137	1.148	27.3484	-0.463		27.2824	0.065	27.2824	1.52	27.0137	1.148				27.2824	0.332	26.5662	2.039		24.0994	3.795	24.7951	3.886	24.5575	0.527		27.2824	2.664			27.2845	0.828		26.5826	-0.6	26.5776	-0.516	26.5826	0.068
	--	27.0466	1.146	27.3817	-0.469		27.3157	0.064	27.3157	1.514	27.0466	1.146				27.3157	0.338	26.5986	1.864		24.1288	3.795	24.8254	3.988	24.5875	0.548		27.3157	2.67			27.3178	0.838		26.615	-0.487	26.6101	-0.426	26.615	0.108
	--	27.0796	1.144	27.4151	-0.469		27.3489	0.059	27.3489	1.505	27.0796	1.144				27.3489	0.343	26.631	1.715		24.1581	4.447	24.8556	4.095	24.6174	0.572		27.3489	2.668			27.351	0.847		26.6474	-0.391	26.6425	-0.35	26.6474	0.141
	--	27.1125	1.143	27.4484	-0.471		27.3822	0.054	27.3822	1.494	27.1125	1.143				27.3822	0.345	26.6634	1.594		24.1875	4.447	24.8858	4.209	24.6473	0.6		27.3822	2.667			27.3843	0.854		26.6799	-0.31	26.6749	-0.287	26.6799	0.165
	--	27.1454	1.142	27.4818	-0.472		27.4155	0.053	27.4155	1.484	27.1454	1.142				27.4155	0.347	26.6958	1.482		24.2169	5.076	24.9161	4.337	24.6773	0.635		27.4155	2.667			27.4176	0.864		26.7123	-0.242	26.7073	-0.234	26.7123	0.187
	--	27.1784	1.143	27.5151	-0.478		27.4487	0.051	27.4487	1.472	27.1784	1.143				27.4487	0.353	26.7282	1.393		24.2463	5.076	24.9463	4.485	24.7072	0.675		27.4487	2.664			27.4509	0.875		26.7447	-0.186	26.7397	-0.189	26.7447	0.207
	--	27.2113	1.139	27.5485	-0.475		27.482	0.056	27.482	1.457	27.2113	1.139				27.482	0.359	26.7606	1.319		24.2757	5.59	24.9766	4.644	24.7372	0.718		27.482	2.668			27.4841	0.889		26.7771	-0.141	26.7721	-0.152	26.7771	0.22
	--	27.2443	1.136	27.5818	-0.475		27.5153	0.055	27.5153	1.444	27.2443	1.136				27.5153	0.366	26.793	1.253		24.3051	5.59	25.0068	4.839	24.7671	0.764		27.5153	2.67			27.5174	0.899		26.8095	-0.101	26.8045	-0.123	26.8095	0.231
	--	27.2772	1.136	27.6152	-0.48		27.5485	0.061	27.5485	1.433	27.2772	1.136				27.5485	0.365	26.8254	1.206		24.3345	5.894	25.037	5.073	24.7971	0.81		27.5485	2.675			27.5507	0.907		26.842	-0.07	26.837	-0.101	26.842	0.239
		27.3102	1.14	27.6485	-0.485		27.5818	0.054	27.5818	1.418	27.3102	1.14				27.5818	0.363	26.8578	1.161		24.3639	5.894	25.0673	5.325	24.827	0.849		27.5818	2.677			27.584	0.918		26.8744	-0.044	26.8694	-0.081	26.8744	0.248
		27.3431	1.143	27.6819	-0.488		27.6151	0.052	27.6151	1.407	27.3431	1.143				27.6151	0.367	26.8902	1.124		24.3933	5.956	25.0975	5.632	24.857	0.895		27.6151	2.682			27.6172	0.926		26.9068	-0.022	26.9018	-0.063	26.9068	0.251
		27.376	1.144	27.7152	-0.486		27.6484	0.05	27.6484	1.405	27.376	1.144				27.6484	0.372	26.9226	1.096		24.4227	5.956	25.1277	5.988	24.8869	0.944		27.6484	2.683			27.6505	0.934		26.9392	-0.007	26.9342	-0.049	26.9392	0.256
		27.409	1.141	27.7486	-0.49		27.6816	0.052	27.6816	1.401	27.409	1.141				27.6816	0.374	26.955	1.064		24.452	5.832	25.158	6.385	24.9169	1		27.6816	2.687			27.6838	0.943		26.9716	0.002	26.9666	-0.038	26.9716	0.259
		27.4419	1.143	27.7819	-0.493		27.7149	0.05	27.7149	1.391	27.4419	1.143				27.7149	0.382	26.9874	1.041		24.4814	5.832	25.1882	6.804	24.9468	1.054		27.7149	2.687			27.7171	0.951		27.004	0.014	26.999	-0.03	27.004	0.258
		27.4749	1.144	27.8153	-0.496		27.7482	0.048	27.7482	1.379	27.4749	1.144				27.7482	0.38	27.0198	1.024				25.2185	7.297	24.9768	1.115		27.7482	2.69			27.7503	0.957		27.0365	0.022	27.0314	-0.024	27.0365	0.262
		27.5078	1.14	27.8486	-0.497		27.7814	0.049	27.7814	1.373	27.5078	1.14				27.7814	0.378	27.0522	1.005				25.2487	7.828	25.0067	1.175		27.7814	2.689			27.7836	0.96		27.0689	0.03	27.0638	-0.02	27.0689	0.262
		27.5408	1.138	27.882	-0.495		27.8147	0.054	27.8147	1.371	27.5408	1.138				27.8147	0.38	27.0846	0.993				25.2789	8.402	25.0367	1.238		27.8147	2.693			27.8169	0.97		27.1013	0.04	27.0962	-0.016	27.1013	0.261
		27.5737	1.138	27.9153	-0.491		27.848	0.054	27.848	1.364	27.5737	1.138				27.848	0.386	27.117	0.982				25.3092	9.007	25.0666	1.294		27.848	2.694			27.8501	0.979		27.1337	0.042	27.1287	-0.014	27.1337	0.26
		27.6066	1.134	27.9487	-0.492		27.8813	0.057	27.8813	1.359	27.6066	1.134				27.8813	0.387	27.1494	0.967				25.3394	9.613	25.0966	1.35		27.8813	2.693			27.8834	0.982		27.1661	0.047	27.1611	-0.01	27.1661	0.256
		27.6396	1.13	27.982	-0.493		27.9145	0.057	27.9145	1.353	27.6396	1.13				27.9145	0.389	27.1818	0.96				25.3697	10.222	25.1265	1.406		27.9145	2.687			27.9167	0.988		27.1986	0.051	27.1935	-0.006	27.1986	0.255
		27.6725	1.13	28.0154	-0.494		27.9478	0.055	27.9478	1.35	27.6725	1.13				27.9478	0.393	27.2142	0.951				25.3999	10.867	25.1565	1.465		27.9478	2.691						27.231	0.053	27.2259	0	27.231	0.255
		27.7055	1.137	28.0487	-0.496		27.9811	0.054	27.9811	1.348	27.7055	1.137				27.9811	0.394	27.2466	0.941				25.4301	11.48	25.1864	1.522		27.9811	2.692						27.2634	0.054	27.2583	0.002	27.2634	0.253
		27.7384	1.143	28.0821	-0.499		28.0143	0.057	28.0143	1.345	27.7384	1.143				28.0143	0.397	27.279	0.932				25.4604	12.091	25.2164	1.574		28.0143	2.692						27.2958	0.057			27.2958	0.258
		27.7714	1.149	28.1154	-0.498		28.0476	0.065	28.0476	1.343	27.7714	1.149				28.0476	0.396						25.4906	12.658	25.2463	1.622		28.0476	2.691						27.3282	0.056			27.3282	0.258
		27.8043	1.15	28.1488	-0.501		28.0809	0.071	28.0809	1.344	27.8043	1.15				28.0809	0.395						25.5208	13.195	25.2763	1.664		28.0809	2.694						27.3606	0.06			27.3606	0.256
		27.8373	1.146	28.1822	-0.501		28.1142	0.07	28.1142	1.341	27.8373	1.146				28.1142	0.398						25.5511	13.672	25.3062	1.702		28.1142	2.699						27.393	0.063			27.393	0.256
		27.8702	1.147	28.2155	-0.502		28.1474	0.067	28.1474	1.338	27.8702	1.147				28.1474	0.401						25.5813	14.059	25.3362	1.738		28.1474	2.703						27.4255	0.061			27.4255	0.255
		27.9032	1.153	28.2489	-0.498		28.1807	0.066	28.1807	1.335	27.9032	1.153				28.1807	0.402						25.6116	14.402	25.3661	1.769		28.1807	2.711						27.4579	0.063			27.4579	0.253
		27.9361	1.159	28.2822	-0.496		28.214	0.068	28.214	1.33	27.9361	1.159				28.214	0.397						25.6418	14.654	25.396	1.79		28.214	2.71						27.4903	0.064			27.4903	0.255
		27.969	1.163	28.3156	-0.499		28.2472	0.071	28.2472	1.326	27.969	1.163				28.2472	0.397						25.672	14.814	25.426	1.802		28.2472	2.705						27.5227	0.063			27.5227	0.253
		28.002	1.162	28.3489	-0.502		28.2805	0.076	28.2805	1.323	28.002	1.162				28.2805	0.4						25.7023	14.887	25.456	1.807		28.2805	2.701						27.5551	0.065			27.5551	0.254
		28.0349	1.163	28.3823	-0.505		28.3138	0.078	28.3138	1.324	28.0349	1.163				28.3138	0.405						25.7325	14.86	25.4859	1.805		28.3138	2.7						27.5876	0.066			27.5876	0.256
		28.0679	1.163	28.4156	-0.508		28.3471	0.079	28.3471	1.325	28.0679	1.163				28.3471	0.404						25.7627	14.744	25.5159	1.805		28.3471	2.703						27.62	0.066			27.62	0.254
		28.1008	1.166	28.449	-0.512		28.3803	0.08	28.3803	1.321	28.1008	1.166				28.3803	0.405						25.793	14.526	25.5458	1.796		28.3803	2.706						27.6524	0.066			27.6524	0.253
		28.1337	1.172	28.4823	-0.515		28.4136	0.083	28.4136	1.323	28.1337	1.172				28.4136	0.4						25.8232	14.223	25.5757	1.783		28.4136	2.706						27.6848	0.066			27.6848	0.252
		28.1667	1.17	28.5157	-0.519		28.4469	0.088	28.4469	1.324	28.1667	1.17				28.4469	0.403						25.8535	13.833	25.6057	1.764		28.4469	2.711						27.7172	0.063			27.7172	0.249
		28.1996	1.173	28.549	-0.521		28.4801	0.093	28.4801	1.33	28.1996	1.173				28.4801	0.398						25.8837	13.388	25.6356	1.738		28.4801	2.711						27.7496	0.064			27.7496	0.249
		28.2326	1.176	28.5824	-0.521		28.5134	0.092	28.5134	1.333	28.2326	1.176				28.5134	0.398						25.9139	12.877	25.6656	1.705		28.5134	2.71						27.7821	0.065			27.7821	0.249
		28.2655	1.183	28.6157	-0.529		28.5467	0.095	28.5467	1.335	28.2655	1.183				28.5467	0.396						25.9442	12.282	25.6955	1.664		28.5467	2.71						27.8145	0.065			27.8145	0.249
		28.2985	1.189	28.6491	-0.53		28.58	0.098	28.58	1.338	28.2985	1.189				28.58	0.397						25.9744	11.676	25.7255	1.618		28.58	2.71						27.8469	0.066			27.8469	0.249
		28.3314	1.192	28.6824	-0.536		28.6132	0.101	28.6132	1.336	28.3314	1.192				28.6132	0.396						26.0047	11.034	25.7554	1.569		28.6132	2.712						27.8793	0.067			27.8793	0.249
		28.3644	1.192	28.7158	-0.537		28.6465	0.104	28.6465	1.335	28.3644	1.192				28.6465	0.394						26.0349	10.321	25.7854	1.52		28.6465	2.709						27.9117	0.067			27.9117	0.252
		28.3973	1.189	28.7491	-0.543		28.6798	0.109	28.6798	1.338	28.3973	1.189				28.6798	0.392						26.0651	9.638	25.8153	1.468		28.6798	2.71						27.9442	0.066			27.9442	0.25
		28.4302	1.197	28.7825	-0.545		28.713	0.112	28.713	1.342	28.4302	1.197				28.713	0.391						26.0954	8.979	25.8453	1.417		28.713	2.709						27.9766	0.066			27.9766	0.251
		28.4632	1.203	28.8158	-0.55		28.7463	0.118	28.7463	1.345	28.4632	1.203				28.7463	0.394						26.1256	8.288	25.8752	1.367		28.7463	2.71						28.009	0.065			28.009	0.249
		28.4961	1.208	28.8492	-0.553		28.7796	0.125	28.7796	1.349	28.4961	1.208				28.7796	0.395						26.1558	7.626	25.9052	1.314		28.7796	2.712						28.0414	0.063			28.0414	0.248
		28.5291	1.209	28.8825	-0.558		28.8129	0.134	28.8129	1.355	28.5291	1.209				28.8129	0.398						26.1861	6.98	25.9351	1.26		28.8129	2.715						28.0738	0.062			28.0738	0.247
		28.562	1.21	28.9159	-0.562		28.8461	0.139	28.8461	1.36	28.562	1.21				28.8461							26.2163	6.353	25.9651	1.209		28.8461	2.714						28.1062	0.06			28.1062	0.249
		28.595	1.211	28.9492	-0.57		28.8794	0.15	28.8794	1.368	28.595	1.211				28.8794							26.2465	5.79	25.995	1.156		28.8794	2.714						28.1387	0.059			28.1387	0.248
		28.6279	1.218	28.9826	-0.576		28.9127	0.157	28.9127	1.375	28.6279	1.218				28.9127							26.2768	5.256	26.025	1.103		28.9127	2.716						28.1711	0.056			28.1711	0.247
		28.6608	1.223	29.0159	-0.582		28.9459	0.166	28.9459	1.386	28.6608	1.223				28.9459							26.307	4.749	26.0549	1.051		28.9459	2.719						28.2035	0.055			28.2035	0.248
		28.6938	1.219	29.0493	-0.589		28.9792	0.18	28.9792	1.398	28.6938	1.219				28.9792							26.3373	4.299	26.0849	1.006		28.9792	2.719						28.2359	0.052			28.2359	0.245
		28.7267	1.218	29.0827	-0.6		29.0125	0.194	29.0125	1.41	28.7267	1.218				29.0125							26.3675	3.865	26.1148	0.96		29.0125	2.72						28.2683	0.052			28.2683	0.245
		28.7597	1.226	29.116	-0.613		29.0458	0.207	29.0458	1.421	28.7597	1.226				29.0458							26.3977	3.478	26.1448	0.917		29.0458	2.719						28.3008	0.051			28.3008	0.244
		28.7926	1.23	29.1493	-0.627		29.079	0.216	29.079	1.439	28.7926	1.23				29.079							26.428	3.147	26.1747	0.872		29.079	2.717						28.3332	0.05			28.3332	0.243
		28.8256	1.229	29.1827	-0.638		29.1123	0.227	29.1123	1.457	28.8256	1.229				29.1123							26.4582	2.84	26.2047	0.828		29.1123	2.716						28.3656	0.05			28.3656	0.244
		28.8585	1.233	29.216	-0.644		29.1456	0.239	29.1456	1.473	28.8585	1.233				29.1456							26.4885	2.588	26.2346	0.786		29.1456	2.716						28.398	0.048			28.398	0.244
		28.8914	1.234	29.2494	-0.656		29.1788	0.252	29.1788	1.485	28.8914	1.234				29.1788	-3.102						26.5187	2.349	26.2645	0.754		29.1788	2.712						28.4304	0.046			28.4304	0.246
		28.9244	1.236	29.2828	-0.672		29.2121	0.263	29.2121	1.495	28.9244	1.236				29.2121	-3.104						26.5489	2.142	26.2945	0.726		29.2121	2.71						28.4628	0.047			28.4628	0.247
		28.9573	1.239	29.3161	-0.687		29.2454	0.28	29.2454	1.511	28.9573	1.239				29.2454	-3.105						26.5792	1.97	26.3244	0.698		29.2454	2.708						28.4953	0.045			28.4953	0.248
		28.9903	1.24	29.3495	-0.696		29.2786	0.296	29.2786	1.528	28.9903	1.24				29.2786	-3.105						26.6094	1.806	26.3544	0.672		29.2786	2.709						28.5277	0.044			28.5277	0.25
		29.0232	1.245	29.3828	-0.704		29.3119	0.309	29.3119	1.55	29.0232	1.245				29.3119	-3.105						26.6396	1.676	26.3843	0.647		29.3119	2.708						28.5601	0.042			28.5601	0.254
		29.0562	1.247	29.4162	-0.717		29.3452	0.318	29.3452	1.568	29.0562	1.247				29.3452	-3.1						26.6699	1.573	26.4143	0.623		29.3452	2.707						28.5925	0.045			28.5925	0.253
		29.0891	1.248	29.4495	-0.728		29.3785	0.33	29.3785	1.586	29.0891	1.248				29.3785	-3.095						26.7001	1.469	26.4442	0.602		29.3785	2.708						28.6249	0.046			28.6249	0.254
		29.1221	1.252	29.4829	-0.741		29.4117	0.343	29.4117	1.6	29.1221	1.252				29.4117	-3.093						26.7304	1.388	26.4742	0.586		29.4117	2.708						28.6574	0.044			28.6574	0.257
		29.155	1.26	29.5162	-0.75		29.445	0.353	29.445	1.611	29.155	1.26				29.445	-3.09						26.7606	1.319	26.5041	0.566		29.445	2.714						28.6898	0.043			28.6898	0.255
		29.1879	1.271	29.5496	-0.759		29.4783	0.364	29.4783	1.618	29.1879	1.271				29.4783	-3.09						26.7908	1.257	26.5341	0.553		29.4783	2.719						28.7222	0.043			28.7222	0.254
		29.2209	1.276	29.5829	-0.765		29.5115	0.367	29.5115	1.626	29.2209	1.276				29.5115	-3.089						26.8211	1.211	26.564	0.54		29.5115	2.721						28.7546	0.044			28.7546	0.253
		29.2538	1.28	29.6163	-0.774		29.5448	0.369	29.5448	1.629	29.2538	1.28				29.5448	-3.088						26.8513	1.168	26.594	0.527		29.5448	2.717						28.787	0.042			28.787	0.252
		29.2868	1.279	29.6496	-0.782		29.5781	0.374	29.5781	1.637	29.2868	1.279				29.5781	-3.088						26.8816	1.134	26.6239	0.516		29.5781	2.718						28.8194	0.043			28.8194	0.254
		29.3197	1.284	29.683	-0.793		29.6114	0.382	29.6114	1.639	29.3197	1.284				29.6114	-3.089						26.9118	1.106	26.6539	0.503		29.6114	2.716						28.8519	0.045			28.8519	0.256
		29.3527	1.286	29.7163	-0.802		29.6446	0.384	29.6446	1.645	29.3527	1.286				29.6446	-3.097						26.942	1.075	26.6838	0.492		29.6446	2.72						28.8843	0.044			28.8843	0.257
		29.3856	1.289	29.7497	-0.814		29.6779	0.379	29.6779	1.645	29.3856	1.289				29.6779	-3.098						26.9723	1.051	26.7138	0.48		29.6779	2.719						28.9167	0.046			28.9167	0.259
		29.4185	1.295	29.783	-0.825		29.7112	0.371	29.7112	1.643	29.4185	1.295				29.7112	-3.095						27.0025	1.032	26.7437	0.471		29.7112	2.718						28.9491	0.045			28.9491	0.259
		29.4515	1.301	29.8164	-0.83		29.7445	0.366	29.7445	1.641	29.4515	1.301				29.7445	-3.093						27.0327	1.016	26.7737	0.471		29.7445	2.717						28.9815	0.046			28.9815	0.258
		29.4844	1.311	29.8497	-0.836		29.7777	0.36	29.7777	1.635	29.4844	1.311				29.7777	-3.095						27.063	1	26.8036	0.464		29.7777	2.712						29.0139	0.048			29.0139	0.259
		29.5174	1.312	29.8831	-0.841		29.811	0.354	29.811	1.633	29.5174	1.312				29.811	-3.098						27.0932	0.99	26.8336	0.463		29.811	2.708						29.0464	0.05			29.0464	0.258
		29.5503	1.312	29.9164	-0.85		29.8443	0.343	29.8443	1.62	29.5503	1.312				29.8443	-3.099						27.1234	0.979	26.8635	0.458		29.8443	2.702						29.0788	0.053			29.0788	0.257
		29.5833	1.312	29.9498	-0.861		29.8775	0.333	29.8775	1.61	29.5833	1.312				29.8775	-3.097						27.1537	0.966	26.8935	0.451		29.8775	2.702						29.1112	0.054			29.1112	0.258
		29.6162	1.319	29.9831	-0.873		29.9108	0.322	29.9108	1.595	29.6162	1.319				29.9108	-3.096						27.1839	0.959	26.9234	0.444		29.9108	2.699						29.1436	0.052			29.1436	0.26
		29.6491	1.324	30.0165	-0.886		29.9441	0.307	29.9441	1.584	29.6491	1.324				29.9441	-3.095						27.2142	0.951	26.9534	0.439		29.9441	2.701						29.176	0.051			29.176	0.264
		29.6821	1.336	30.0498	-0.894		29.9773	0.292	29.9773	1.569	29.6821	1.336				29.9773	-3.099						27.2444	0.942	26.9833	0.434		29.9773	2.702						29.2084	0.048			29.2084	0.266
		29.715	1.345	30.0832	-0.896		30.0106	0.281	30.0106	1.553	29.715	1.345				30.0106	-3.092						27.2746	0.933	27.0132	0.433		30.0106	2.71						29.2409	0.048			29.2409	0.266
		29.748	1.35	30.1166	-0.9		30.0439	0.269	30.0439	1.533	29.748	1.35				30.0439	-3.089						27.3049	0.927	27.0432	0.435		30.0439	2.715						29.2733	0.047			29.2733	0.264
		29.7809	1.351	30.1499	-0.903		30.0772	0.255	30.0772	1.516	29.7809	1.351				30.0772	-3.091								27.0731	0.439		30.0772	2.713						29.3057	0.047			29.3057	0.263
		29.8139	1.356	30.1833	-0.909		30.1104	0.243	30.1104	1.498	29.8139	1.356				30.1104	-3.093								27.1031	0.442		30.1104	2.706						29.3381	0.05			29.3381	0.262
		29.8468	1.36	30.2166	-0.913		30.1437	0.236	30.1437	1.482	29.8468	1.36				30.1437	-3.094								27.1331	0.442		30.1437	2.702
		29.8798	1.362	30.25	-0.917		30.177	0.225	30.177	1.465	29.8798	1.362				30.177	-3.089											30.177	2.702
		29.9127	1.363	30.2833	-0.922		30.2102	0.211	30.2102	1.447	29.9127	1.363				30.2102	-3.086											30.2102	2.705
		29.9456	1.364	30.3167	-0.927		30.2435	0.196	30.2435	1.434	29.9456	1.364				30.2435	-3.082											30.2435	2.706
		29.9786	1.37				30.2768	0.186	30.2768	1.423	29.9786	1.37				30.2768	-3.082											30.2768	2.71
		30.0115	1.37				30.3101	0.178	30.3101	1.412	30.0115	1.37				30.3101	-3.085											30.3101	2.707
		30.0445	1.366								30.0445	1.366
		30.0774	1.365								30.0774	1.365
		30.1104	1.369								30.1104	1.369
		30.1433	1.372								30.1433	1.372
		30.1762	1.375								30.1762	1.375
		30.2092	1.371								30.2092	1.371
		30.2421	1.367								30.2421	1.367
		30.2751	1.363								30.2751	1.363
		30.308	1.362								30.308	1.362

## Sheet: Supplementary Figure3a-g
Supplementary Figure 3a							Supplementary Figure 3b					Supplementary Figure 3c							Supplementary Figure 3d							Supplementary Figure 3e				Supplementary Figure 3f						Supplementary Figure 3g
DP_X	DP_Y	Fit_X	Fit_Y	NDH_X	NDH_Y		DP_X	DP_Y	NDH_X	NDH_Y		DP_X	DP_Y	Fit_X	Fit_Y	NDH_X	NDH_Y		DP_X	DP_Y	Fit_X	Fit_Y	NDH_X	NDH_Y		DP_X	DP_Y	NDH_X	NDH_Y	0	0	0	0	0	0	sedimentation coefficient (S)	c(s)	sedimentation coefficient (S)	c(s)	sedimentation coefficient (S)	c(s)
0.083333	-0.000919	0.033651	-7.96091	0.169079	-7.98068		0.083333	-0.001808	0.091199	-0.861183		0.083333	-0.000231	0.039535	-11.0109	0.198651	-11.0437		0.083333	-0.003503	0.032958	-12.5722	0.165595	-12.4569		0.083333	-0.000396	0.166615	0.005099	0.035	-0.002	0.032	0	0.035	-0.001	Trx TOM1(437 463)		myo6(1157 1285)		Trx TOM1(437 463) with myo6(1157 1285)2
0.1	-0.000455	0.169079	-7.92261	0.305816	-7.92912		0.1	-0.001738	0.164952	-0.904456		0.166667	0.001234	0.198651	-10.9733	0.359327	-10.9365		0.1	-0.001373	0.165595	-12.4702	0.299514	-12.1404		0.1	-4.8e-05	0.301358	0.068444	0.07	-0.002	0.065	-0.001	0.07	-0.001	0	0.00947	0	0.00857	0	0.00771
0.116667	6.9e-05	0.305816	-7.84661	0.44386	-7.75915		0.116667	-0.001628	0.23941	-0.88286		0.25	-0.001191	0.359327	-10.8863	0.521561	-10.7378		0.116667	-0.001212	0.299514	-12.2291	0.434714	-11.797		0.116667	-0.000111	0.43739	0.061643	0.105	-0.003	0.097	-0.005	0.105	-0.005	0.07538	0.54281	0.07538	0.59202	0.07538	0.47186
0.133333	0.000274	0.44386	-7.74404	0.583212	-7.47354		0.133333	-0.001449	0.314575	-0.83992		0.333333	0.003274	0.521561	-10.737	0.685355	-10.3172		0.133333	-0.000892	0.434714	-11.8044	0.571194	-11.2356		0.133333	-0.000104	0.574711	-0.123775	0.14	-0.004	0.13	-0.006	0.139	-0.007	0.15075	0.00719	0.15075	0.03985	0.15075	0.0109
0.15	0.000218	0.583212	-7.60281	0.723872	-7.39299		0.15	-0.001309	0.390444	-1.02157		0.416667	0.003189	0.685355	-10.4553	0.850708	-9.7713		0.15	-0.000352	0.571194	-11.0041	0.708956	-9.38936		0.15	-6.7e-05	0.71332	0.059328	0.174	-0.005	0.162	-0.009	0.174	-0.007	0.22613	2.29074e-05	0.22613	0.00252	0.22613	0.000128706
0.166667	0.000502	0.723872	-7.40424	0.86584	-7.09451		0.166667	-0.001249	0.467019	-0.875486		0.5	-0.001687	0.850708	-9.8612	1.01762	-8.66363		0.166667	0.000158	0.708956	-9.47552	0.847998	-6.84909		0.166667	-0.000129	0.853219	0.130532	0.209	-0.005	0.195	-0.007	0.209	-0.01	0.30151	3.23022e-08	0.30151	0.000176956	0.30151	1.37669e-06
0.183333	0.000486	0.86584	-7.11993	1.00912	-6.61779		0.183333	-0.0011	0.5443	-0.926807		0.583333	-0.001887	1.01762	-8.5303	1.18609	-6.15135		0.183333	0.000348	0.847998	-7.00386	0.988322	-4.5576		0.183333	-0.000162	0.994406	0.037575	0.244	-0.004	0.227	-0.007	0.244	-0.008	0.37688	4.12125e-11	0.37688	1.51675e-05	0.37688	2.14479e-08
0.2	3.1e-05	1.00912	-6.70984	1.1537	-6.20886		0.2	-0.000697	0.622286	-0.969177		0.666667	-0.00098	1.18609	-6.12876	1.35612	-3.64945		0.2	0.00053	0.988322	-4.36235	1.12993	-2.61604		0.2	3.6e-05	1.13688	0.102928	0.279	-0.005	0.259	-0.004	0.279	-0.009	0.45226	9.80986e-14	0.45226	1.70122e-06	0.45226	7.11276e-10
0.216667	-0.000175	1.1537	-6.12842	1.29959	-5.4032		0.216667	-0.000404	0.700977	-0.757598		0.75	0.000782	1.35612	-3.77307	1.52771	-2.44455		0.216667	0.000441	1.12993	-2.57881	1.27281	-1.48269		0.216667	-7.7e-05	1.28065	-0.013828	0.314	-0.003	0.292	-0.007	0.314	-0.01	0.52764	5.96174e-14	0.52764	2.61964e-07	0.52764	6.47343e-11
0.233333	-0.00032	1.29959	-5.35309	1.44679	-4.41613		0.233333	9e-06	0.780374	-0.86365		0.833333	0.000848	1.52771	-2.50429	1.70086	-2.05595		0.233333	0.000103	1.27281	-1.63376	1.41698	-1.09976		0.233333	-0.0003	1.4257	0.090536	0.349	-0.004	0.324	-0.009	0.349	-0.007	0.60301	2.31247e-14	0.60301	5.69129e-08	0.60301	1.80814e-11
0.25	-0.000546	1.44679	-4.43536	1.5953	-3.56067		0.25	0.000642	0.860477	-1.03619		0.916667	0.000858	1.70086	-1.94578	1.87557	-1.81164		0.25	-0.000416	1.41698	-1.1447	1.56242	-0.933547		0.25	-0.000602	1.57204	0.092309	0.384	-0.005	0.357	-0.01	0.384	-0.006	0.67839	6.43427e-14	0.67839	1.75811e-08	0.67839	1.5119e-11
0.266667	-0.000622	1.5953	-3.51432	1.74511	-2.66342		0.266667	0.001245	0.941285	-1.03764		1	1e-05	1.87557	-1.68348	2.05184	-1.65703		0.266667	-0.000164	1.56242	-0.875437	1.70915	-0.675325		0.266667	-0.000505	1.71968	0.049476	0.419	-0.007	0.389	-0.01	0.418	-0.006	0.75377	1.7241e-14	0.75377	7.65754e-09	0.75377	3.30187e-11
0.283333	-0.000527	1.74511	-2.73279	1.89624	-2.12085		0.283333	0.001738	1.0228	-0.973888		1.08333	0.000725	2.05184	-1.54552	2.22966	-1.55069		0.283333	6.7e-05	1.70915	-0.715827	1.85716	-0.565751		0.283333	-0.000357	1.8686	0.053998	0.453	-0.01	0.421	-0.009	0.453	-0.007	0.82915	2.32798e-14	0.82915	4.61071e-09	0.82915	1.52704e-10
0.3	-0.000502	1.89624	-2.14785	2.04867	-1.71921		0.3	0.001938	1.10502	-0.968046		1.16667	-0.000301	2.22966	-1.46549	2.40905	-1.51621		0.3	0.000412	1.85716	-0.614832	2.00645	-0.537341		0.3	-0.000289	2.01881	-0.046268	0.488	-0.012	0.454	-0.01	0.488	-0.009	0.90452	6.09785e-14	0.90452	3.73977e-09	0.90452	1.1747e-09
[truncated: 3,042 more rows]

## Sheet: Supplementary Figure5a-d
Supplementary Figure 5a					Supplementary Figure 5b					Supplementary Figure 5c					Supplementary Figure 5d
[truncated: 3,059 more rows]

[truncated: 7 more sheets: Supplementary Figure7b, Supplementary Figure8a and 8b, Supplementary Figure9b,9d,9f, Supplementary Figure10a-c, Supplementary Figure12b, Supplementary Figure13a-f, Supplementary Figure 13a-f]
